# Supplementary material for: Development of models and a tool (DBPCytoGenoTOX Predictor) for predicting the cytotoxicity and genotoxicity of disinfection byproducts
Source: Royal Society of Chemistry journal article supplement (doi:10.1039/d5em00552c), 2025-11-25
Supplement: d5em00552c1.xlsx [file d5em00552c1.xlsx]

## Sheet: Table S2 - S3
Table S2 Parameters Comparison Between Previous and Our Optimal Cytotoxicity Prediction Models
Model	Test cell	n	R2	R2YS	Q2LOO	Q2LMO	Q2BOOT	Q2CV	Q2YS	RMSE	MAE	s	CCC	r2m	Δr2m	VIF	F	p	Reference
Acceptable threshold		--	> 0.7	--	> 0.6	> 0.6	> 0.6	> 0.6	--	--	--	--	> 0.850	> 0.5	< 0.2	< 10	> 5	< 0.0005
MLR	only CHO	74	0.763–0.799	--	0.718–0.745	--	--	--	--	0.634	--	--	0.806–0.848	0.57	0.153	--	--	--	Qin, L.-T. et al. 2019
ES-SWR	only CHO	15	0.844	0.271	0.719	--	--	--	-0.277	0.212	0.137	--	--	--	--	--	19.8	< 0.0001	Zhang, Z. et al. 2020
ES-SWR	only CHO	10	0.933	0.23	0.617	--	--	--	-0.678	0.19	0.128	--	--	--	--	1.19	48.6	< 0.0001	Wei, X. et al. 2020
NGBoost-RF	multiple cell	722	0.62	--	--	--	--	--	--	0.63	--	--	--	--	--	--	--	--	Sikder, R. et al. 2024
MLR	only CHO	10	0.877	≤ 0.685	0.634	--	--	--	≤ 0.333	0.278	0.242	--	--	--	--	1.352	24.977	< 0.0005	Zhang, Z. et al. 2024
GBDT	only CHO	184	1	--	0.752	0.654	0.633	0.677	-	0.00139/0.511	0.00112/0.379	0.00144/0.569	0.888	0.714	0.148	--	--	--	This paper
Table S3 Parameters Comparison Between Previous and Our Optimal Genotoxicity Prediction Models
Model Type	Model group	Test type	Model	n	R2	R2YS	Q2LOO	Q2YS	RMSE	MAE	VIF	F	P	Prediction	True Prediction	accuracy (Q)	Precision	Sensitivity (Sn=Recall)	Specificity (Sp)	F1-Score	Balanced_Accuracy	MCC	Reference
Acceptable threshold				-	> 0.7	-	> 0.6	-	-	-	< 10	> 5	< 0.0005	--	--	--	--	--	--	--	--	--	--
QSAR	-		ES-SWR	10	0.887	0.221	0.714	-0.465	0.261	0.209	1.19	27.6	< 0.001	--	--	--	--	--	--	--	--	--	Wei, X. et al. 2020
SAR	Chromosome Aberrations in Chinese Hamster Ovary (CHO) Cells	in Vitro Mammalian Chromosome Aberration Test	DB battery	--	--	--	--	--	--	--	--	--	--	1	1	1	1	1	--	1	--	--	QSAR Toolbox
			DB CASE Ultra	--	--	--	--	--	--	--	--	--	--	3	1	0.333333	1	0.333333	--	0.5	--	--	QSAR Toolbox
			DB Leadscope	--	--	--	--	--	--	--	--	--	--	5	1	0.2	1	0.2	--	0.333333	--	--	QSAR Toolbox
			DB SciQSAR	--	--	--	--	--	--	--	--	--	--	10	3	0.3	1	0.3	--	0.461538	--	--	QSAR Toolbox
	Mutations in HGPRT (Hypoxanthine-guanine phosphoribosyltransferase) Locus in Chinese Hamster Ovary (CHO) Cells	Mammalian Cell Gene Mutation Assay	DB battery	--	--	--	--	--	--	--	--	--	--	2	1	0.5	1	0.5	--	0.666667	--	--	QSAR Toolbox
			DB CASE Ultra	--	--	--	--	--	--	--	--	--	--	7	1	0.142857	1	0.142857	--	0.25	--	--	QSAR Toolbox
			DB Leadscope	--	--	--	--	--	--	--	--	--	--	9	3	0.333333	1	0.142857	1	0.25	0.571429	0.188982	QSAR Toolbox
			DB SciQSAR	--	--	--	--	--	--	--	--	--	--	13	3	0.230769	0.5	0.2	0.333333	0.285714	0.266667	-0.426006	QSAR Toolbox
	--	Single Cell Gel Electrophoresis (comet) Assay	RF	--	--	--	--	--	--	--	--	--	--	24	24	1	1	1	1	1	1	1	This Paper
n is the number of predictive variables; R2 is squared correlation coefficient of observed and predicted values; R2YS and Q2YS are Y-scrambling technique parameters; Q2LOO, Q2LMO, Q2BOOT and Q2CV are leave-one out cross validation Q2, leave-many out cross validation Q2, cross validation Q2 and bootstrapping coefficient Q2, respectively; CCC is concordance correlation coefficient; r2m is external …
Reference articles		Full name
Qin, L.-T. et al. 2019		Qin, L.-T.; Zhang, X.; Chen, Y.-H.; Mo, L.-Y.; Zeng, H.-H.; Liang, Y.-P.; Lin, H.; Wang, D.-Q. Predicting the cytotoxicity of disinfection by-products to Chinese hamster ovary by using linear quantitative structure-activity relationship models. Environ. Sci. Pollut. Res. 2019, 26 (16), 16606–16615. DOI: 10.1007/s11356-019-04947-z.
Zhang, Z. et al. 2020		Zhang, Z.; Zhu, Q.; Huang, C.; Yang, M.; Li, J.; Chen, Y.; Yang, B.; Zhao, X. Comparative cytotoxicity of halogenated aromatic DBPs and implications of the corresponding developed QSAR model to toxicity mechanisms of those DBPs: binding interactions between aromatic DBPs and catalase play an important role. Water Res. 2020, 170, 115283. DOI: 10.1016/j.watres.2019.115283.
Wei, X. et al. 2020		Wei, X.; Yang, M.; Zhu, Q.; Wagner, E. D.; Plewa, M. J. Comparative quantitative toxicology and QSAR modeling of the haloacetonitriles: forcing agents of water disinfection byproduct toxicity. Environ. Sci. Technol. 2020, 54 (14), 8909–8918. DOI: 10.1021/acs.est.0c02035.
Sikder, R. et al. 2024		Sikder, R.; Zhang, H.; Gao, P.; Ye, T. Machine learning framework for predicting cytotoxicity and identifying toxicity drivers of disinfection byproducts. J. Hazard. Mater. 2024, 469, 133989. DOI: 10.1016/j.jhazmat.2024.133989.
Zhang, Z. et al. 2024		Zhang, Z.; Hu, S.; Sun, G.; Wang, W. Target analysis, occurrence and cytotoxicity of halogenated polyhydroxyphenols as emerging disinfection byproducts in drinking water. Water Res. 2024, 248, 120883. DOI: 10.1016/j.watres.2023.120883.
QSAR Toolbox		Dimitrov, S. D.; Diderich, R.; Sobanski, T.; Pavlov, T. S.; Chankov, G. V.; Chapkanov, A. S.; Karakolev, Y. H.; Temelkov, S. G.; Vasilev, R. A.; Gerova, K. D.; Kuseva, C. D.; Todorova, N. D.; Mehmed, A. M.; Rasenberg, M.; Mekenyan, O. G. QSAR toolbox - workflow and major functionalities. SAR QSAR Environ. Res. 2016, 27 (3), 203–219. DOI: 10.1080/1062936X.2015.1136680.
Nicola C. et al. 2012		Chirico, N.; Gramatica, P. Real external predictivity of QSAR models. Part 2. New intercomparable thresholds for different validation criteria and the need for scatter plot inspection. J. Chem. Inf. Model. 2012, 52 (8), 2044–2058. DOI: 10.1021/ci300084j.

## Sheet: Table S4
Table S4 Cytotoxicity Data Set of DBP Toward CHO Cell
No.	Name	CAS NO	SMILES	LC50(μM)	Molecular Weight	LC50(mg/L)	Reference articles
214	Bromoacetic Acid	79-08-3	C(C(=O)O)Br	9.47	138.95	1.31586	Plewa et al. 2002
217	Dibromoacetic Acid	631-64-1	C(C(=O)O)(Br)Br	560	217.84	121.99	Plewa et al. 2002
223	Tribromoacetic Acid	75-96-7	OC(=O)C(Br)(Br)Br	542.5	296.74	160.981	Plewa et al. 2002
215	Chloroacetic Acid	79-11-8	OC(=O)CCl	876.83	94.5	82.8604	Plewa et al. 2002
218	Dichloroacetic Acid	79-43-6	OC(=O)C(Cl)Cl	7470	128.94	963.182	Plewa et al. 2002
224	Trichloroacetic Acid	76-03-9	OC(=O)C(Cl)(Cl)Cl	5424	163.38	886.173	Plewa et al. 2002
1118	3-Chloro-4-(Dichloromethyl)-5-Hydroxy2[5H]-Furanone	77439-76-0	OC1OC(=O)C(Cl)=C1C(Cl)Cl	275	217.43	59.7933	Plewa et al. 2002
1787	Potassium Bromate	7758-01-2	[O-]Br(=O)=O.[K+]	963	167	160.821	Plewa et al. 2002
611	Ethylmethanesulfonate	62-50-0	CCOS(C)(=O)=O	4250	124.16	527.68	Plewa et al. 2002
41	Bromonitromethane	563-70-2	[O-][N+](=O)CBr	7.06	139.94	0.987976	Plewa et al. 2004a
43	Dibromonitromethane	598-91-4	[O-][N+](=O)C(Br)Br	6.09	218.83	1.33267	Plewa et al. 2004a
46	Tribromonitromethane	464-10-8	[O-][N+](=O)C(Br)(Br)Br	8.57	297.73	2.55155	Plewa et al. 2004a
42	Chloronitromethane	1794-84-9	[O-][N+](=O)CCl	529	95.48	50.5089	Plewa et al. 2004a
44	Dichloronitromethane	7119-89-3	[O-][N+](=O)C(Cl)Cl	373	129.93	48.4639	Plewa et al. 2004a
47	Trichloronitromethane	76-06-2	[O-][N+](=O)C(Cl)(Cl)Cl	536	164.37	88.1023	Plewa et al. 2004a
45	Bromochloronitromethane	135531-25-8	C([N+](=O)[O-])(Cl)Br	40.5	174.38	7.06239	Plewa et al. 2004a
48	Bromodichloronitromethane	918-01-4	[O-][N+](=O)C(Cl)(Cl)Br	13.2	208.82	2.75642	Plewa et al. 2004a
49	Dibromochloronitromethane	1184-89-0	[O-][N+](=O)C(Cl)(Br)Br	6.88	253.28	1.74257	Plewa et al. 2004a
216	Iodoacetic Acid	64-69-7	OC(=O)CI	2.95	185.95	0.548552	Plewa et al. 2004b
53	Iodoacetamide	144-48-9	NC(=O)CI	1.42	184.96	0.262643	Plewa et al. 2008
56	Diiodoacetamide	5875-23-0	C(C(=O)N)(I)I	0.528	310.86	0.164134	Plewa et al. 2008
57	Bromoiodoacetamide	62872-36-0	C(C(=O)N)(Br)I	3.81	263.86	1.00531	Plewa et al. 2008
58	Chloroiodoacetamide	62872-35-9	C(C(=O)N)(Cl)I	5.97	219.41	1.30988	Plewa et al. 2008
52	Bromoacetamide	683-57-8	NC(=O)CBr	1.89	137.96	0.260744	Plewa et al. 2008
54	Dibromoacetamide	598-70-9	NC(=O)C(Br)Br	9.72	216.86	2.10788	Plewa et al. 2008
59	Tribromoacetamide	594-47-8	NC(=O)C(Br)(Br)Br	3.14	295.76	0.928686	Plewa et al. 2008
60	Bromochloroacetamide	62872-34-8	C(C(=O)N)(Cl)Br	17.1	172.41	2.94821	Plewa et al. 2008
64	Dibromochloroacetamide	855878-13-6	C(=O)(C(Cl)(Br)Br)N	4.75	251.3	1.19368	Plewa et al. 2008
61	Bromodichloroacetamide	98137-00-9	C(=O)(C(Cl)(Cl)Br)N	8.68	206.85	1.79546	Plewa et al. 2008
51	Chloroacetamide	79-07-2	NC(=O)CCl	148	93.51	13.8395	Plewa et al. 2008
55	Dichloroacetamide	683-72-7	NC(=O)C(Cl)Cl	1920	127.95	245.664	Plewa et al. 2008
62	Trichloroacetamide	594-65-0	NC(=O)C(Cl)(Cl)Cl	2050	162.4	332.92	Plewa et al. 2008
220	Bromochloroacetic Acid	5589-96-8	OC(=O)C(Cl)Br	778.67	173.39	135.014	Plewa et al. 2010
225	Chlorodibromoacetic Acid	5278-95-5	OC(=O)C(Cl)(Br)Br	201	252.29	50.7103	Plewa et al. 2010
226	Bromodichloroacetic Acid	71133-14-7	OC(=O)C(Cl)(Cl)Br	686.25	207.83	142.623	Plewa et al. 2010
1193	3-Chlorotyrosine	7423-93-0	N[C@@H](Cc1ccc(O)c(Cl)c1)C(O)=O	3169.4	215.63	683.418	Plewa et al. 2018
1194	3,5-Dichlorotyrosine	15106-62-4	NC(Cc1cc(Cl)c(O)c(Cl)c1)C(O)=O	708.8	250.08	177.257	Plewa et al. 2018
1798	N,2,2-Trichloroacetamide	35077-09-9	O=C(NCl)C(Cl)Cl	389.86	162.4	63.3133	Plewa et al. 2018
229	3,3-Dibromopropenoic acid	1578-21-8	OC(=O)C=C(Br)Br	295	229.85	67.8057	Plewa and Wagner. 2009
235	3,3-Dibromo-4-oxopentanoic acid	199744-31-5	O=C(O)CC(Br)(Br)C(=O)C	16.4	273.91	4.49212	Plewa and Wagner. 2009
236	3-Bromo-3-chloro-4-oxopentanoic acid	907200-89-9	O=C(O)CC(Cl)(Br)C(=O)C	28.9	229.45	6.6311	Plewa and Wagner. 2009
227	(2Z)-3-Bromo-3-iodo-propenoic acid	39121-33-0	C(=C(/Br)\I)\C(=O)O	198.5	276.86	54.9567	Plewa and Wagner. 2009
231	2,3,3-Tribromopropenoic acid	71815-46-8	OC(=O)C(Br)=C(Br)Br	1640	308.75	506.35	Plewa and Wagner. 2009
237	2-Bromobutenedioic acid	644-80-4	OC(=O)C=C(Br)C(O)=O	2060	194.97	401.638	Plewa and Wagner. 2009
232	2,3-Dibromopropenoic acid	24767-86-0	C(=C(/C(=O)O)\Br)\Br	2200	229.85	505.67	Plewa and Wagner. 2009
238	2-Bromo-3-methyl-butenedioic acid	23366-89-4	C/C(=C(\C(=O)O)/Br)/C(=O)O	5270	208.99	1101.38	Plewa and Wagner. 2009
111	Chlorodiiodomethane	638-73-3	ClC(I)I	2406.67	302.28	727.488	Plewa and Wagner. 2009
112	Triiodomethane	75-47-8	IC(I)I	66	393.732	25.9863	Plewa and Wagner. 2009
113	Dibromoiodomethane	593-94-2	BrC(Br)I	1906.67	299.73	571.486	Plewa and Wagner. 2009
114	Bromochloroiodomethane	34970-00-8	ClC(Br)I	2413.33	255.28	616.075	Plewa and Wagner. 2009
115	Tribromomethane	75-25-2	BrC(Br)Br	3960	252.73	1000.81	Plewa and Wagner. 2009
116	Chlorodibromomethane	124-48-1	ClC(Br)Br	5360	208.28	1116.38	Plewa and Wagner. 2009
117	Trichloromethane	67-66-3	ClC(Cl)Cl	9440	119.37	1126.85	Plewa and Wagner. 2009
118	Bromodichloromethane	75-27-4	ClC(Cl)Br	11500	163.83	1884.05	Plewa and Wagner. 2009
119	Dichloroiodomethane	594-04-7	ClC(Cl)I	4130	210.83	870.728	Plewa and Wagner. 2009
120	Bromodiiodomethane	557-95-9	BrC(I)I	1400	346.73	485.422	Plewa and Wagner. 2009
827	2-Iodophenol	533-58-4	Oc1ccccc1I	601	220.01	132.226	Plewa and Wagner. 2017
828	4-Iodophenol	540-38-5	Oc1ccc(I)cc1	216	220.01	47.5222	Plewa and Wagner. 2017
845	2,4,6-Triiodophenol	609-23-4	Oc1c(I)cc(I)cc1I	56.9	471.8	26.8454	Plewa and Wagner. 2017
829	4-Iodo-2-Methylphenol	60577-30-2	Cc1cc(I)ccc1O	163	234.03	38.1469	Plewa and Wagner. 2017
1073	N-Nitrosomorpholine	59-89-2	O=NN1CCOCC1	11100	116.12	1288.93	Wagner et al. 2014
1074	N-Nitromorpholine	4164-32-3	[O-][N+](=O)N1CCOCC1	84600	132.12	11177.4	Wagner et al. 2014
16	N-Nitrodiethanolamine	4185-47-1	[O-][N+](=O)OCCN(CCO[N+]([O-])=O)[N+]([O-])=O	12600	240.13	3025.64	Wagner et al. 2014
1151	1-Nitrosopiperazine	5632-47-3	O=NN1CCNCC1	9510	115.13	1094.89	Wagner et al. 2014
1152	1-Nitropiperazine	42499-41-2	C1CN(CCN1)[N+](=O)[O-]	8890	131.13	1165.75	Wagner et al. 2014
1150	1,4-Dinitrosopiperazine	140-79-4	O=NN1CCN(CC1)N=O	12800	144.13	1844.86	Wagner et al. 2014
1153	1,4-Dinitropiperazine	4164-37-8	[O-][N+](=O)N1CCN(CC1)[N+]([O-])=O	2850	176.13	501.971	Wagner et al. 2014
1178	2,3,5-Tribromopyrrole	77124-07-3	C1=C(NC(=C1Br)Br)Br	61	303.78	18.5306	Richardson et al. 2003
219	Diiodoacetic Acid	598-89-0	OC(=O)C(I)I	332	311.84	103.531	Richardson et al. 2008
221	Bromoiodoacetic Acid	71815-43-5	C(C(=O)O)(Br)I	897	264.84	237.561	Richardson et al. 2008
228	(E)-3-Bromo-3-Iodopropenoic Acid	59110-12-2	C(=C(\Br)/I)\C(=O)O	145	276.86	40.1447	Richardson et al. 2008
1788	(E)-3-Bromo-2-Iodopropenoic Acid	39121-35-2	C(=C(C(=O)O)I)Br	43.6	276.86	12.0711	Richardson et al. 2008
230	(E)-2-Iodo-3-Methylbutenedioic Acid	769146-63-6	C/C(=C(/C(=O)O)\I)/C(=O)O	944	255.99	241.655	Richardson et al. 2008
257	Chloroacetaldehyde	107-20-0	ClCC=O	3.51	78.5	0.275535	Jeong et al. 2015
256	Bromoacetaldehyde	17157-48-1	BrCC=O	17.28	122.95	2.12458	Jeong et al. 2015
258	Iodoacetaldehyde	55782-51-9	C(C=O)I	6	169.95	1.0197	Jeong et al. 2015
260	Dichloroacetaldehyde	79-02-7	ClC(Cl)C=O	29.25	112.94	3.3035	Jeong et al. 2015
259	Dibromoacetaldehyde	3039-13-2	BrC(Br)C=O	4.7	201.84	0.948648	Jeong et al. 2015
261	Bromochloroacetaldehyde	98136-99-3	CC(=O)OC(Cl)Br	5.34	157.39	0.840463	Jeong et al. 2015
263	Trichloroacetaldehyde	75-87-6	ClC(Cl)(Cl)C=O	1161.5	147.38	171.182	Jeong et al. 2015
262	Tribromoacetaldehyde	115-17-3	BrC(Br)(Br)C=O	3.58	280.74	1.00505	Jeong et al. 2015
265	Bromodichloroacetaldehyde	34619-29-9	ClC(Cl)(Br)C=O	20.35	191.84	3.90394	Jeong et al. 2015
264	Dibromochloroacetaldehyde	64316-11-6	C(=O)C(Cl)(Br)Br	5.15	236.29	1.21689	Jeong et al. 2015
280	Iodoacetonitrile	624-75-9	ICC#N	3.29	166.95	0.549265	Muellner et al.2007
278	Bromoacetonitrile	590-17-0	BrCC#N	3.17	119.95	0.380242	Muellner et al.2007
281	Dibromoacetonitrile	3252-43-5	BrC(Br)C#N	2.84	198.84	0.564706	Muellner et al.2007
283	Bromochloroacetonitrile	83463-62-1	ClC(Br)C#N	8.37	154.39	1.29224	Muellner et al.2007
279	Chloroacetonitrile	107-14-2	ClCC#N	159.67	75.5	12.0551	Muellner et al.2007
282	Dichloroacetonitrile	3018-12-0	ClC(Cl)C#N	97.39	109.94	10.7071	Muellner et al.2007
287	Trichloroacetonitrile	545-06-2	ClC(Cl)(Cl)C#N	159.64	144.38	23.0488	Muellner et al.2007
289	Cyanogen Bromide	506-68-3	BrC#N	20.9	105.92	2.21373	Pals et al. 2009
290	Cyanogen Chloride	506-77-4	ClC#N	3250	61.47	199.778	Pals et al. 2009
291	Cyanogen Iodide	506-78-5	IC#N	90.1	152.922	13.7783	Pals et al. 2009
690	4-Hydroxy-3,5-Diiodo-1-Nitrobenzine	305-85-1	Oc1c(I)cc(cc1I)[N+]([O-])=O	33.5	390.9	13.0952	Wagner et al. 2017
842	4-Hydroxy-3,5-Diiodo-1-Phenyl	28177-54-0	C1=CC(=C(C(=C1)I)O)I	33.2	345.9	11.4839	Wagner et al. 2017
739	4-Hydroxy-3-Iodo-1-Phenolic Acid	37470-46-5	C1=CC(=C(C=C1C(=O)O)I)O	318	264.02	83.9584	Wagner et al. 2017
744	4-Hydroxy-3,5-Diiodo-1-Phenolic Acid	618-76-8	OC(=O)c1cc(I)c(O)c(I)c1	288	389.91	112.294	Wagner et al. 2017
1799	4-Hydroxy-3-Iodophenyl	6893-02-3	C1=CC(=C(C=C1OC2=C(C=C(C=C2I)C[C@@H](C(=O)O)N)I)I)O	408	650.97	265.596	Wagner et al. 2017
678	5-Amino-N1,N3-Bis(1,3-Dihydroxypropan-2-Yl)-2,4,6-Triiodoisophthalamide	60166-98-5	C(C(CO)NC(=O)C1=C(C(=C(C(=C1I)N)I)C(=O)NC(CO)CO)I)O	1440.7	705.02	1015.72	Wendel et al. 2016
679	N1,N3-Bis(1,3-Dihydroxy-Propan-2-Yl)-2,4,6-Triiodo-5-Nitroisophthalamide	1877263-84-7	O=C(NC(CO)CO)C=1C(I)=C(C(=O)NC(CO)CO)C(I)=C(C1I)N(=O)=O	933.7	735.01	686.279	Wendel et al. 2016
677	4-Chloro-N1,N3-Bis(1,3-Dihydroxypropan-2-Yl)-2,6-Diiodo-5-Nitroiso-Phthalamide	1877263-85-8	O=C(NC(CO)CO)C=1C(Cl)=C(C(I)=C(C(=O)NC(CO)CO)C1I)N(=O)=O	1296.2	643.55	834.17	Wendel et al. 2016
676	4,6-Dichloro-N1,N3-Bis(1,3-Dihydroxypropan-2-Yl)-2-Iodo-5-Nitroisophthalamide	1877263-86-9	O=C(NC(CO)CO)C=1C(Cl)=C(C(Cl)=C(C(=O)NC(CO)CO)C1I)N(=O)=O	832.3	552.1	459.513	Wendel et al. 2016
1018	2,6-Dichloro-P-Benzoquinone	697-91-6	ClC1=CC(=O)C=C(Cl)C1=O	27.04	176.98	4.78554	Prochazka et al. 2015
1019	2,6-Dibromo-P-Benzoquinone	19643-45-9	BrC1=CC(=O)C=C(Br)C1=O	16.7	265.89	4.44036	Prochazka et al. 2015
839	2,4,6-Tribromophenol	118-79-6	Oc1c(Br)cc(Br)cc1Br	99.9	330.8	33.0469	Zhang ZX et al. 2019
837	2,6-Dibromo-4-Chlorophenol	5324-13-0	Oc1c(Br)cc(Cl)cc1Br	133	286.35	38.0846	Zhang ZX et al. 2019
831	2,6-Dichloro-4-Bromophenol	3217-15-0	Oc1c(Cl)cc(Br)cc1Cl	175	241.89	42.3308	Zhang ZX et al. 2019
826	2,4,6-Trichlorophenol	88-06-2	Oc1c(Cl)cc(Cl)cc1Cl	244	197.4	48.1656	Zhang ZX et al. 2019
688	2,6-Dibromo-4-Nitrophenol	99-28-5	Oc1c(Br)cc(cc1Br)[N+]([O-])=O	50.7	296.9	15.0528	Zhang ZX et al. 2019
1622	2-Bromo-4-Chloro-6-Nitrophenol	15969-10-5	C1=C(C=C(C(=C1[N+](=O)[O-])O)Br)Cl	80.1	252.45	20.2212	Zhang ZX et al. 2019
685	2,6-Dichloro-4-Nitrophenol	618-80-4	Oc1c(Cl)cc(cc1Cl)[N+]([O-])=O	67.3	208	13.9984	Zhang ZX et al. 2019
761	3,5-Dibromo-4-Hydroxybenzaldehyde	2973-77-5	Oc1c(Br)cc(C=O)cc1Br	130	279.91	36.3883	Zhang ZX et al. 2019
758	3-Bromo-5-Chloro-4-Hydroxybenzalde Hyde	1849-76-9	C1=C(C=C(C(=C1Cl)O)Br)C=O	204	235.46	48.0338	Zhang ZX et al. 2019
757	3,5-Dichloro-4-Hydroxybenzaldehyde	2314-36-5	C1=C(C=C(C(=C1Cl)O)Cl)C=O	320	191.01	61.1232	Zhang ZX et al. 2019
742	3,5-Dibromo-2-Hydroxybenzoic Acid	3147-55-5	C1=C(C=C(C(=C1C(=O)O)O)Br)Br	221	295.91	65.3961	Zhang ZX et al. 2019
738	3-Bromo-5-Chloro-2-Hydroxybenzoic Acid	4068-58-0	C1=C(C=C(C(=C1C(=O)O)O)Br)Cl	356	251.46	89.5198	Zhang ZX et al. 2019
733	3,5-Dichloro-2-Hydroxybenzoic Acid	320-72-9	OC(=O)c1cc(Cl)cc(Cl)c1O	477	207.01	98.7438	Zhang ZX et al. 2019
741	3,5-Dibromo-4-Hydroxybenzoic Acid	3337-62-0	OC(=O)c1cc(Br)c(O)c(Br)c1	1960	295.91	579.984	Zhang ZX et al. 2019
734	3,5-Dichloro-4-Hydroxybenzoic Acid	3336-41-2	OC(=O)c1cc(Cl)c(O)c(Cl)c1	2160	207.01	447.142	Zhang ZX et al. 2019
777	2-Chlorophenyl-Acetonitrile	2856-63-5	Clc1ccccc1CC#N	140.5	151.59	21.2984	Chu Wenhai et al. 2018
783	3,4-Dichlorophenyl-Acetonitrile	3218-49-3	Clc1ccc(CC#N)cc1Cl	83	186.03	15.4405	Chu Wenhai et al. 2018
222	Chloroiodoacetic acid	53715-09-6	C(C(=O)O)(Cl)I	304	220.39	66.9986	Wagner et al. 2017
1800	3-Iodo-L-tyrosine	70-78-0	NC(Cc1ccc(O)c(I)c1)C(O)=O	10600	307.08	3255.05	Dayong Tian et al.2020
1801	3,5-Dibromo-tyrosine	300-38-9	NC(Cc1cc(Br)c(O)c(Br)c1)C(O)=O	1900	338.98	644.062	Dayong Tian et al.2020
1802	3,5-Diiodo-tyrosine	66-02-4	NC(Cc1cc(I)c(O)c(I)c1)C(O)=O	550	432.98	238.139	Dayong Tian et al.2020
286	Tribromoacetonitrile	75519-19-6	BrC(Br)(Br)C#N	2.71	277.74	0.752675	Cristina Postigo et al.2018
284	Bromodichloroacetonitrile	60523-73-1	ClC(Cl)(Br)C#N	10.22	188.84	1.92994	Cristina Postigo et al.2018
285	Chlorodibromoacetonitrile	144772-39-4	ClC(Br)(Br)C#N	8.14	233.29	1.89898	Cristina Postigo et al.2018
1797	2,3-diiodo-1,4-benzoquinone	222417-90-5	O=C1C=CC(=O)C(I)=C1I	15.78	359.89	5.67906	Huan Wu et al.2021
1009	2,6-diiodo-1,4-benzoquinone	20389-01-9	IC1=CC(=O)C=C(I)C1=O	16.21	359.89	5.83382	Huan Wu et al.2021
1015	2,5-dibromo-1,4-benzoquinone	1633-14-3	C1=C(C(=O)C=C(C1=O)Br)Br	22.72	265.89	6.04102	Huan Wu et al.2021
1553	2-chloro-1,4-benzoquinone	695-99-8	ClC1=CC(=O)C=CC1=O	18.04	142.54	2.57142	Huan Wu et al.2021
1014	2,5-dichloro-1,4-benzoquinone	615-93-0	ClC1=CC(=O)C(Cl)=CC1=O	23.62	176.98	4.18027	Huan Wu et al.2021
1005	2,3,6-trichloro-1,4-benzoquinone	634-85-5	ClC1=CC(=O)C(Cl)=C(Cl)C1=O	34.42	211.4	7.27639	Huan Wu et al.2021
1007	2,3,5,6-tetrachloro-1,4-benzoquinone	118-75-2	ClC1=C(Cl)C(=O)C(Cl)=C(Cl)C1=O	33.26	245.9	8.17863	Huan Wu et al.2021
789	2-Bromostyrene	2039-88-5	Brc1ccccc1C=C	1530	183.04	280.051	Xin-Yang Zhang et al.2021
790	1-Bromo-1-phenylethylene	98-81-7	Brc1ccccc1C=C	517	183.04	94.6317	Xin-Yang Zhang et al.2021
756	2-Bromobenzaldehyde	6630-33-7	Brc1ccccc1C=O	1014	185.02	187.61	Xin-Yang Zhang et al.2021
764	3-Bromobenzaldehyde	3132-99-8	Brc1cccc(C=O)c1	1127	185.02	208.518	Xin-Yang Zhang et al.2021
765	4-Bromobenzaldehyde	1122-91-4	Brc1ccc(C=O)cc1	1573	185.02	291.036	Xin-Yang Zhang et al.2021
785	2-Bromophenylacetonitrile	19472-74-3	Brc1ccccc1CC#N	1648	196.04	323.074	Xin-Yang Zhang et al.2021
786	3-Bromophenylacetonitrile	31938-07-5	Brc1cccc(CC#N)c1	1327	196.04	260.145	Xin-Yang Zhang et al.2021
301	Chloral hydrate	302-17-0	OC(O)C(Cl)(Cl)Cl	1160	165.4	191.864	Zhechao Hua et al.2021
1533	2-(2-chlorophenyl)acetamide	10268-06-1	C1=CC=C(C(=C1)CC(=O)N)Cl	4970	169.61	842.962	Shaoyang Hu et al.2022
1534	2-(3-chlorophenyl)acetamide	58357-84-9	C1=CC(=CC(=C1)Cl)CC(=O)N	3070	169.61	520.703	Shaoyang Hu et al.2022
1535	2-(2,4-dichlorophenyl)acetamide	55954-27-3	C1=CC(=C(C=C1Cl)Cl)CC(=O)N	1400	204.05	285.67	Shaoyang Hu et al.2022
1536	2-(2,6-dichlorophenyl)acetamide	78433-88-2	C1=CC(=C(C(=C1)Cl)CC(=O)N)Cl	1140	204.05	232.617	Shaoyang Hu et al.2022
1537	2-(3,4-dichlorophenyl)acetamide	868697-78-3	C1=CC(=C(C=C1CC(=O)N)Cl)Cl	1420	204.05	289.751	Shaoyang Hu et al.2022
1539	2-(2-bromophenyl)acetamide	65999-53-3	C1=CC=C(C(=C1)CC(=O)N)Br	3690	214.06	789.881	Shaoyang Hu et al.2022
1538	2-(3-bromophenyl)acetamide	60312-83-6	C1=CC(=CC(=C1)Br)CC(=O)N	2800	214.06	599.368	Shaoyang Hu et al.2022
1803	2-(2,6-dibromophenyl)acetamide	1935918-32-3	O=C(N)CC=1C(Br)=CC=CC1Br	717	292.95	210.045	Shaoyang Hu et al.2022
1540	2-(2-iodophenyl)acetamide	195456-43-0	C1=CC=C(C(=C1)CC(=O)N)I	1980	261.06	516.899	Shaoyang Hu et al.2022
1804	2-(2-bromo-6-chlorophenyl)acetamide	2766856-31-7	O=C(N)CC=1C(Cl)=CC=CC1Br	1000	248.5	248.5	Shaoyang Hu et al.2022
1805	3-bromotyrosine	54788-30-6	C1=CC(=C(C=C1CC(C(=O)O)N)Br)O	11600	260.08	3016.93	Dayong Tian et al.2020
1806	3,5-dibromotyrosine	537-24-6	NC(Cc1cc(Br)c(O)c(Br)c1)C(O)=O	1900	338.98	644.062	Shaoyang Hu et al.2022
1807	3,5-diiodotyrosine	300-39-0	C1=C(C=C(C(=C1I)O)I)C[C@@H](C(=O)O)N	550	432.98	238.139	Shaoyang Hu et al.2022
703	3-iodotyrosylalanine	42934-94-1	O=C(O)C(NC(=O)C(N)CC1=CC=C(O)C(I)=C1)C	5000	378.16	1890.8	Dayong Tian et al.2020
709	3,5-diiodotyrosylalanine	42934-95-2	O=C(O)C(NC(=O)C(N)CC1=CC(I)=C(O)C(I)=C1)C	780	504.06	393.167	Dayong Tian et al.2020
1549	2-chloro-1,4-naphthoquinone	1010-60-2	ClC1=CC(=O)c2ccccc2C1=O	3.17	192.6	0.610542	Hangcheng Jiang et al.2022
1550	2-bromo-1,4-naphthoquinone	2065-37-4	BrC1=CC(=O)c2ccccc2C1=O	6.23	237.05	1.47682	Hangcheng Jiang et al.2022
1808	2-idodine-1,4-naphthoquinone	35079-24-4	C1=CC=C2C(=C1)C(=O)C=C(C2=O)I	4.41	284.05	1.25266	Hangcheng Jiang et al.2022
1551	2,3-dichloro-naphthoquinone	117-80-6	ClC1C(=O)c2ccccc2C(=O)C=1Cl	13.78	227.04	3.12861	Hangcheng Jiang et al.2022
1552	2,3-dibromo-1,4- naphthoquinone	13243-65-7	BrC1C(=O)c2ccccc2C(=O)C=1Br	4.27	315.94	1.34906	Hangcheng Jiang et al.2022
1809	1,4- naphthoquinone	130-15-4	O=C1C=CC(=O)c2ccccc12	1.08	158.15	0.170802	Hangcheng Jiang et al.2022
1810	1-Chloronaphthalene	90-13-1	C1=CC=C2C(=C1)C=CC=C2Cl	276.67	162.61	44.9893	Hangcheng Jiang et al.2022
1554	2-chloro-6-methyl-1,4-benzoquinone	1123-64-4	CC1=CC(=O)C=C(C1=O)Cl	8.1	156.56	1.26814	Jinxiu Lou et al.2022
1555	5-chloro-2,3-dimethyl-1,4-benzoquinone	40967-77-9	CC1=C(C(=O)C(=CC1=O)Cl)C	7.9	170.59	1.34766	Jinxiu Lou et al.2022
1006	2,6-Dichloro-3-methyl-1,4-benzoquinone	40100-98-9	CC1=C(C(=O)C(=CC1=O)Cl)Cl	24.6	191.01	4.69885	Jinxiu Lou et al.2022
1558	2,3-Dichloro-5,6-dimethyl-1,4-benzoquinone	15707-31-0	CC1=C(C(=O)C(=C(C1=O)Cl)Cl)C	18.8	205.03	3.85456	Jinxiu Lou et al.2022
1647	2-chloroadenine	1839-18-5	Nc1nc(Cl)nc2nc[nH]c12	9.4	169.57	1.59396	Guangrong Sun et al.2023
1648	6-chloroguanine	10310-21-1	Nc1nc(Cl)c2[nH]cnc2n1	1500	169.57	254.355	Guangrong Sun et al.2023
1811	5-bromocytosine	2240-25-7	NC1=NC(=O)NC=C1Br	160000	190	30400	Guangrong Sun et al.2023
1645	5-chlorouracil	1820-81-1	ClC1=CNC(=O)NC1=O	2800	146.53	410.284	Guangrong Sun et al.2023
1649	5-bromouracil	51-20-7	BrC1=CNC(=O)NC1=O	80000	190.98	15278.4	Guangrong Sun et al.2023
1646	6-chlorouracil	4270-27-3	ClC1NC(=O)NC(=O)C=1	120000	146.53	17583.6	Guangrong Sun et al.2023
1812	2-chloroadenosine	146-77-0	Nc1nc(Cl)nc2c1ncn2C1OC(CO)C(O)C1O	6.8	301.69	2.05149	Guangrong Sun et al.2023
1813	8-bromoadenosine	2946-39-6	Nc1ncnc2c1nc(Br)n2[C@@H]1O[C@H](CO)[C@@H](O)[C@H]1O	12	346.14	4.15368	Guangrong Sun et al.2023
1814	8-bromoguanosine	4016-63-1	Nc1nc(O)c2nc(Br)n([C@@H]3O[C@H](CO)[C@@H](O)[C@H]3O)c2n1	2400	362.14	869.136	Guangrong Sun et al.2023
1815	6-chloroguanosine	2004-07-1	C1=NC2=C(N1[C@H]3[C@@H]([C@@H]([C@H](O3)CO)O)O)N=C(N=C2Cl)N	94	301.69	28.3589	Guangrong Sun et al.2023
1816	5-bromocytidine	3066-86-2	C1=C(C(=NC(=O)N1[C@H]2[C@@H]([C@@H]([C@H](O2)CO)O)O)N)Br	13	322.11	4.18743	Guangrong Sun et al.2023
1789	5-bromouridine	957-75-5	OC[C@H]1O[C@H]([C@H](O)[C@@H]1O)N1C=C(Br)C(=O)NC1=O	87	323.1	28.1097	Guangrong Sun et al.2023
1784	3-hydroxyquinoline	580-18-7	C1=CC=C2C(=C1)C=C(C=N2)O	570	145.16	82.7412	Bao-Jun Xu et al.2024
1785	4-hydroxyquinoline	611-36-9	C1=CC=C2C(=C1)C(=O)C=CN2	530	145.16	76.9348	Bao-Jun Xu et al.2024
1786	benzopyridine	91-22-5	C1=CC=C2C(=C1)C=CC=N2	1900	129.16	245.404	Bao-Jun Xu et al.2024
Some substances have identical SMILES codes (because they are isomers) but different CAS numbers. We decided to consider them as different DBPs.
All "No." follows Table S6 "Updated DBPs Inventory"
Reference articles		Full name
Plewa et al. 2002		Plewa, M. J.; Kargalioglu, Y.; Vankerk, D.; Minear, R. A.; Wagner, E. D. Mammalian cell cytotoxicity and genotoxicity analysis of drinking water disinfection by‐products. Environ. Mol. Mutagen. 2002, 40 (2), 134–142. DOI: 10.1002/em.10092
Plewa et al. 2004a		Plewa, M. J.; Wagner, E. D.; Jazwierska, P.; Richardson, S. D.; Chen, P. H.; McKague, A. B. Halonitromethane Drinking Water Disinfection Byproducts: Chemical Characterization and Mammalian Cell Cytotoxicity and Genotoxicity. Environ. Sci. Technol. 2004, 38 (1), 62–68. DOI: 10.1021/es030477l.
Plewa et al. 2004b		Plewa, M. J.; Wagner, E. D.; Richardson, S. D.; Thruston, A. D.; Woo, Y.-T.; McKague, A. B. Chemical and biological characterization of newly discovered iodoacid drinking water disinfection byproducts. Environ. Sci. Technol. 2004, 38 (18), 4713–4722. DOI: 10.1021/es049971v.
Plewa et al. 2008		Plewa, M. J.; Muellner, M. G.; Richardson, S. D.; Fasano, F.; Buettner, K. M.; Woo, Y.-T.; McKague, A. B.; Wagner, E. D. Occurrence, Synthesis, and Mammalian Cell Cytotoxicity and Genotoxicity of Haloacetamides: An Emerging Class of Nitrogenous Drinking Water Disinfection Byproducts. Environ. Sci. Technol. 2008, 42 (3), 955–961. DOI: 10.1021/es071754h.
Plewa et al. 2010		Plewa, M. J.; Simmons, J. E.; Richardson, S. D.; Wagner, E. D. Mammalian cell cytotoxicity and genotoxicity of the haloacetic acids, a major class of drinking water disinfection by-products. Environ. Mol. Mutagen. 2010, 51 (8–9), 871–878. DOI: 10.1002/em.20585.
Plewa et al. 2018		Vu, T. N.; Kimura, S. Y.; Plewa, M. J.; Richardsond, S. D.; Marinas, B. J. Predominant N-haloacetamide and haloacetonitrile formation in drinking water via the aldehyde reaction pathway. Environ. Sci. Technol. 2019, 53 (2), 850–859. DOI: 10.1021/acs.est.8b02862.
Plewa and Wagner. 2009		Plewa, M. J. & Wagner, E. D. Mammalian Cell Cytotoxicity And Genotoxicity Of Disinfection By-Products. Water Research Foundation. 2009, https://repository.library.noaa.gov/view/noaa/42356 (accessed Mar.1, 2025)
Plewa and Wagner. 2017		Liberatore, H. K.; Plewa, M. J.; Wagner, E. D.; VanBriesen, J. M.; Burnett, D. B.; Cizmas, L. H.; Richardson, S. D. Identification and comparative mammalian cell cytotoxicity of new iodo-phenolic disinfection byproducts in chloraminated oil and gas wastewaters. Environ. Sci. Technol. Lett. 2017, 4 (11), 475–480. DOI: 10.1021/acs.estlett.7b00468.
Wagner et al. 2014		Wagner, E. D.; Osiol, J.; Mitch, W. A.; Plewa, M. J. Comparative in vitro toxicity of nitrosamines and nitramines associated with amine-based carbon capture and storage. Environ. Sci. Technol. 2014, 48 (14), 8203–8211. DOI: 10.1021/es5018009.
Richardson et al. 2003		Richardson, S. D. et al. Richardson, S. D.; Thruston, A. D.; Rav-Acha, C.; Groisman, L.; Popilevsky, I.; Juraev, O.; Glezer, V.; McKague, A. B.; Plewa, M. J.; Wagner, E. D. Tribromopyrrole, brominated acids, and other disinfection byproducts produced by disinfection of drinking water rich in bromide. Environ. Sci. Technol. 2003, 37 (17), 3782–3793. DOI: 10.1021/es030339w. by disinfection of drink…
Richardson et al. 2008		Richardson, S. D.; Fasano, F.; Ellington, J. J.; Crumley, F. G.; Buettner, K. M.; Evans, J. J.; Blount, B. C.; Silva, L. K.; Waite, T. J.; Luther, G. W.; McKague, A. B.; Miltner, R. J.; Wagner, E. D.; Plewa, M. J. Occurrence and mammalian cell toxicity of iodinated disinfection byproducts in drinking water. Environ. Sci. Technol. 2008, 42 (22), 8330–8338. DOI: 10.1021/es801169k.
Jeong et al. 2015		Jeong, C. H.; Postigo, C.; Richardson, S. D.; Simmons, J. E.; Kimura, S. Y.; Mariñas, B. J.; Barcelo, D.; Liang, P.; Wagner, E. D.; Plewa, M. J. Occurrence and Comparative Toxicity of Haloacetaldehyde Disinfection Byproducts in Drinking Water. Environ. Sci. Technol. 2015, 49 (23), 13749–13759. DOI: 10.1021/es506358x.
Muellner et al.2007		Muellner, M. G.; Wagner, E. D.; McCalla, K.; Richardson, S. D.; Woo, Y.-T.; Plewa, M. J. Haloacetonitriles vs. Regulated Haloacetic Acids: Are Nitrogen-Containing DBPs More Toxic? Environ. Sci. Technol. 2007, 41 (2), 645–651. DOI: 10.1021/es0617441.
Pals et al. 2009		Komaki, Y.; Pals, J.; Wagner, E. D.; Mariñas, B. J.; Plewa, M. J. Mammalian Cell DNA Damage and Repair Kinetics of Monohaloacetic Acid Drinking Water Disinfection By-Products. Environ. Sci. Technol. 2009, 43 (21), 8437–8442. DOI: 10.1021/es901852z.
Wagner et al. 2017		Wagner, E. D.; Plewa, M. J. CHO cell cytotoxicity and genotoxicity analyses of disinfection by-products: An updated review. J. Environ. Sci. 2017, 58, 64–76. DOI: 10.1016/j.jes.2017.04.021.
Wendel et al. 2016		Wendel, F. M.; Ternes, T. A.; Richardson, S. D.; Duirk, S. E.; Pals, J. A.; Wagner, E. D.; Plewa, M. J. Comparative toxicity of high-molecular weight iopamidol disinfection byproducts. Environ. Sci. Technol. Lett. 2016, 3 (3), 81–84. DOI: 10.1021/acs.estlett.6b00037.
Prochazka et al. 2015		Procházka, E.; Escher, B. I.; Plewa, M. J.; Leusch, F. D. L. In vitro cytotoxicity and adaptive stress responses to selected haloacetic acid and halobenzoquinone water disinfection byproducts. Chem. Res. Toxicol. 2015, 28 (10), 2059–2068. DOI: 10.1021/acs.chemrestox.5b00283.
Zhang ZX et al. 2019		Zhang, Z.; Zhu, Q.; Huang, C.; Yang, M.; Li, J.; Chen, Y.; Yang, B.; Zhao, X. Comparative cytotoxicity of halogenated aromatic DBPs and implications of the corresponding developed QSAR model to toxicity mechanisms of those DBPs: binding interactions between aromatic DBPs and catalase play an important role. Water Res. 2020, 170, 115283. DOI: 10.1016/j.watres.2019.115283.
Chu Wenhai et al. 2018		Zhang, D.; Chu, W.; Yu, Y.; Krasner, S. W.; Pan, Y.; Shi, J.; Yin, D.; Gao, N. Occurrence and Stability of Chlorophenylacetonitriles: A New Class of Nitrogenous Aromatic DBPs in Chlorinated and Chloraminated Drinking Waters. Environ. Sci. Technol. Lett. 2018, 5 (6), 394–399. DOI: 10.1021/acs.estlett.8b00220
Cristina Postigo et al.2018		Postigo, C.; Emiliano, P.; Barceló, D.; Valero, F. Chemical characterization and relative toxicity assessment of disinfection byproduct mixtures in a large drinking water supply network. J. Hazard. Mater. 2018, 359, 166–173. DOI: 10.1016/j.jhazmat.2018.07.022.
Huan Wu et al.2021		Wu, H.; Long, K.; Sha, Y.; Lu, D.; Xia, Y.; Mo, Y.; Yang, Q.; Zheng, W.; Yang, M.; Wei, X. Occurrence and toxicity of halobenzoquinones as drinking water disinfection byproducts. Sci. Total Environ. 2021, 770, 145277. DOI: 10.1016/j.scitotenv.2021.145277.
Xin-Yang Zhang et al.2021		Zhang, X.-Y.; Lu, Y.; Du, Y.; Wang, W.-L.; Yang, L.-L.; Wu, Q.-Y. Comprehensive GC×GC-qMS with a mass-to-charge ratio difference extraction method to identify new brominated byproducts during ozonation and their toxicity assessment. J. Hazard. Mater. 2021, 403, 124103. DOI: 10.1016/j.jhazmat.2020.124103.
Zhechao Hua et al.2021		Hua, Z.; Li, D.; Wu, Z.; Wang, D.; Cui, Y.; Huang, X.; Fang, J.; An, T. DBP formation and toxicity alteration during UV/chlorine treatment of wastewater and the effects of ammonia and bromide. Water Res. 2021, 188, 116549. DOI: 10.1016/j.watres.2020.116549.
Shaoyang Hu et al.2022		Hu, S.; Kaw, H. Y.; Zhu, L.; Wang, W. Formation and cytotoxicity of halophenylacetamides: a new group of nitrogenous aromatic halogenated disinfection byproducts in drinking water. Environ. Sci. Technol. 2022, 56 (5), 3181–3192. DOI: 10.1021/acs.est.1c08419.
Dayong Tian et al.2020		Tian, D.; Moe, B.; Huang, G.; Jiang, P.; Ling, Z.-C.; Li, X.-F. Cytotoxicity of halogenated tyrosyl compounds, an emerging class of disinfection byproducts. Chem. Res. Toxicol. 2020, 33 (4), 1028–1035. DOI: 10.1021/acs.chemrestox.0c00049.
Hangcheng Jiang et al.2022		Jiang, H.; Kaw, H. Y.; Zhu, L.; Wang, W. Halonaphthoquinones: a group of emerging disinfection byproducts of high toxicity in drinking water. Water Res. 2022, 217, 118421. DOI: 10.1016/j.watres.2022.118421
Jinxiu Lou et al.2022		Lou, J.; Lu, H.; Wang, W.; He, S.; Zhu, L. Quantitative identification of halo-methyl-benzoquinones as disinfection byproducts in drinking water using a pseudo-targeted LC-MS/MS method. Water Res. 2022, 218, 118466. DOI: 10.1016/j.watres.2022.118466.
Guangrong Sun et al.2023		Sun, G.; Guo, P.; Kaw, H. Y.; Zhou, M.; Wang, W. Uncovering an emerging group of halogenated nucleobase-derived disinfection byproducts in drinking water: prioritization of the highly cytotoxic 2-chloroadenine. Environ. Sci. Technol. 2023, 57 (23), 8768–8775. DOI: 10.1021/acs.est.3c01484
Bao-Jun Xu et al.2024		Xu, B.-J.; Lu, Y.; Liu, N.; Chen, Y.; Liu, M.; Wu, Q.-Y.; Du, Y. Increased Toxicity toward Mammalian Cells in the Periodate Oxidation Process of Wastewater: The Overlooked Formation of Noniodinated but Nitrogenous Byproducts. Environ. Sci. Technol. 2024, 58 (50), 22064–22075. DOI: 10.1021/acs.est.4c10187.

## Sheet: Table S5
Table S5 Genotoxicity Data Set of DBP Toward CHO Cell
No.	Name	CAS NO	SMILES	50%TDNA(μM)	Molecular Weight	50%TDNA(mg/L)	Reference articles
214	Bromoacetic Acid	79-08-3	C(C(=O)O)Br	17	138.95	2.36215	Plewa et al. 2002
217	Dibromoacetic Acid	631-64-1	C(C(=O)O)(Br)Br	1758	217.84	382.963	Plewa et al. 2002
223	Tribromoacetic Acid	75-96-7	OC(=O)C(Br)(Br)Br	2424	296.74	719.298	Plewa et al. 2002
215	Chloroacetic Acid	79-11-8	OC(=O)CCl	411	94.5	38.8395	Plewa et al. 2002
218	Dichloroacetic Acid	79-43-6	OC(=O)C(Cl)Cl	NS	128.94	Negative	Plewa et al. 2002
224	Trichloroacetic Acid	76-03-9	OC(=O)C(Cl)(Cl)Cl	NS	163.38	Negative	Plewa et al. 2002
1118	3-Chloro-4-(Dichloromethyl)-5-Hydroxy2[5H]-Furanone	77439-76-0	OC1OC(=O)C(Cl)=C1C(Cl)Cl	244	217.43	53.0529	Plewa et al. 2002
1787	Potassium Bromate	7758-01-2	[O-]Br(=O)=O.[K+]	7195	167	1201.57	Plewa et al. 2002
611	Ethylmethanesulfonate	62-50-0	CCOS(C)(=O)=O	6057	124.16	752.037	Plewa et al. 2002
41	Bromonitromethane	563-70-2	[O-][N+](=O)CBr	136	139.94	19.0318	Plewa et al. 2004a
43	Dibromonitromethane	598-91-4	[O-][N+](=O)C(Br)Br	26.2	218.83	5.73335	Plewa et al. 2004a
46	Tribromonitromethane	464-10-8	[O-][N+](=O)C(Br)(Br)Br	69.9	297.73	20.8113	Plewa et al. 2004a
42	Chloronitromethane	1794-84-9	[O-][N+](=O)CCl	2150	95.48	205.282	Plewa et al. 2004a
44	Dichloronitromethane	7119-89-3	[O-][N+](=O)C(Cl)Cl	421	129.93	54.7005	Plewa et al. 2004a
47	Trichloronitromethane	76-06-2	[O-][N+](=O)C(Cl)(Cl)Cl	93.4	164.37	15.3522	Plewa et al. 2004a
45	Bromochloronitromethane	135531-25-8	C([N+](=O)[O-])(Cl)Br	165	174.38	28.7727	Plewa et al. 2004a
48	Bromodichloronitromethane	918-01-4	[O-][N+](=O)C(Cl)(Cl)Br	63.2	208.82	13.1974	Plewa et al. 2004a
49	Dibromochloronitromethane	1184-89-0	[O-][N+](=O)C(Cl)(Br)Br	143	253.28	36.219	Plewa et al. 2004a
216	Iodoacetic Acid	64-69-7	OC(=O)CI	8.7	185.95	1.61776	Plewa et al. 2004b
53	Iodoacetamide	144-48-9	NC(=O)CI	34.1	184.96	6.30714	Plewa et al. 2008
56	Diiodoacetamide	5875-23-0	C(C(=O)N)(I)I	33.9	310.86	10.5382	Plewa et al. 2008
57	Bromoiodoacetamide	62872-36-0	C(C(=O)N)(Br)I	72.1	263.86	19.0243	Plewa et al. 2008
58	Chloroiodoacetamide	62872-35-9	C(C(=O)N)(Cl)I	302	219.41	66.2618	Plewa et al. 2008
52	Bromoacetamide	683-57-8	NC(=O)CBr	36.8	137.96	5.07693	Plewa et al. 2008
54	Dibromoacetamide	598-70-9	NC(=O)C(Br)Br	744	216.86	161.344	Plewa et al. 2008
59	Tribromoacetamide	594-47-8	NC(=O)C(Br)(Br)Br	32.5	295.76	9.6122	Plewa et al. 2008
60	Bromochloroacetamide	62872-34-8	C(C(=O)N)(Cl)Br	583	172.41	100.515	Plewa et al. 2008
64	Dibromochloroacetamide	855878-13-6	C(=O)(C(Cl)(Br)Br)N	69.4	251.3	17.4402	Plewa et al. 2008
61	Bromodichloroacetamide	98137-00-9	C(=O)(C(Cl)(Cl)Br)N	146	206.85	30.2001	Plewa et al. 2008
51	Chloroacetamide	79-07-2	NC(=O)CCl	1380	93.51	129.044	Plewa et al. 2008
55	Dichloroacetamide	683-72-7	NC(=O)C(Cl)Cl	NS＞10000	127.95	Negative	Plewa et al. 2008
62	Trichloroacetamide	594-65-0	NC(=O)C(Cl)(Cl)Cl	6540	162.4	1062.1	Plewa et al. 2008
220	Bromochloroacetic Acid	5589-96-8	OC(=O)C(Cl)Br	3426.67	173.39	594.15	Plewa et al. 2010
225	Chlorodibromoacetic Acid	5278-95-5	OC(=O)C(Cl)(Br)Br	13733.3	252.29	3464.78	Plewa et al. 2010
235	3,3-Dibromo-4-oxopentanoic acid	199744-31-5	O=C(O)CC(Br)(Br)C(=O)C	50	273.91	13.6955	Plewa and Wagner. 2009
236	3-Bromo-3-chloro-4-oxopentanoic acid	907200-89-9	O=C(O)CC(Cl)(Br)C(=O)C	358	229.45	82.1431	Plewa and Wagner. 2009
237	2-Bromobutenedioic acid	644-80-4	OC(=O)C=C(Br)C(O)=O	5900	194.97	1150.32	Plewa and Wagner. 2009
232	2,3-Dibromopropenoic acid	24767-86-0	C(=C(/C(=O)O)\Br)\Br	7850	229.85	1804.32	Plewa and Wagner. 2009
111	Chlorodiiodomethane	638-73-3	ClC(I)I	2950	302.28	891.726	Plewa and Wagner. 2009
13	N-Nitrosodimethylamine	62-75-9	CN(C)N=O	2390	74.08	177.051	Wagner et al. 2014
1073	N-Nitrosomorpholine	59-89-2	O=NN1CCOCC1	52200	116.12	6061.46	Wagner et al. 2014
1150	1,4-Dinitrosopiperazine	140-79-4	O=NN1CCN(CC1)N=O	63900	144.13	9209.91	Wagner et al. 2014
1178	2,3,5-Tribromopyrrole	77124-07-3	C1=C(NC(=C1Br)Br)Br	299	303.78	90.8302	Richardson et al. 2003
219	Diiodoacetic Acid	598-89-0	OC(=O)C(I)I	1980	311.84	617.443	Richardson et al. 2008
221	Bromoiodoacetic Acid	71815-43-5	C(C(=O)O)(Br)I	3160	264.84	836.894	Richardson et al. 2008
227	(Z)-3-Bromo-3-Iodopropenoic Acid	39121-33-0	OC(=O)C(I)=CBr	NS	276.86	Negative	Plewa and Wagner. 2009
228	(E)-3-Bromo-3-Iodopropenoic Acid	59110-12-2	C(=C(\Br)/I)\C(=O)O	6350	276.86	1758.06	Richardson et al. 2008
1788	(E)-3-Bromo-2-Iodopropenoic Acid	39121-35-2	C(=C(C(=O)O)I)Br	7580	276.86	2098.6	Richardson et al. 2008
230	(E)-2-Iodo-3-Methylbutenedioic Acid	769146-63-6	C/C(=C(/C(=O)O)\I)/C(=O)O	6000	255.99	1535.94	Richardson et al. 2008
112	Iodoform	75-47-8	IC(I)I	NS	393.732	Negative	Plewa and Wagner. 2009
113	Dibromoiodomethane	593-94-2	BrC(Br)I	NS	299.73	Negative	Plewa and Wagner. 2009
119	Dichloroiodomethane	594-04-7	ClC(Cl)I	NS	210.83	Negative	Plewa and Wagner. 2009
114	Bromochloroiodomethane	34970-00-8	ClC(Br)I	NS	255.28	Negative	Plewa and Wagner. 2009
120	Bromodiiodomethane	557-95-9	BrC(I)I	NS	346.73	Negative	Plewa and Wagner. 2009
257	Chloroacetaldehyde	107-20-0	ClCC=O	142.8	78.5	11.2098	Jeong et al. 2015
256	Bromoacetaldehyde	17157-48-1	BrCC=O	381.2	122.95	46.8685	Jeong et al. 2015
258	Iodoacetaldehyde	55782-51-9	C(C=O)I	1009	169.95	171.48	Jeong et al. 2015
260	Dichloroacetaldehyde	79-02-7	ClC(Cl)C=O	795	112.94	89.7873	Jeong et al. 2015
259	Dibromoacetaldehyde	3039-13-2	BrC(Br)C=O	111.3	201.84	22.4648	Jeong et al. 2015
261	Bromochloroacetaldehyde	98136-99-3	CC(=O)OC(Cl)Br	621.4	157.39	97.8021	Jeong et al. 2015
263	Trichloroacetaldehyde	75-87-6	ClC(Cl)(Cl)C=O	NS	147.38	Negative	Jeong et al. 2015
262	Tribromoacetaldehyde	115-17-3	BrC(Br)(Br)C=O	340.3	280.74	95.5358	Jeong et al. 2015
265	Bromodichloroacetaldehyde	34619-29-9	ClC(Cl)(Br)C=O	470.4	191.84	90.2415	Jeong et al. 2015
264	Dibromochloroacetaldehyde	64316-11-6	C(=O)C(Cl)(Br)Br	143.7	236.29	33.9549	Jeong et al. 2015
280	Iodoacetonitrile	624-75-9	ICC#N	36.15	166.95	6.03524	Muellner et al.2007
278	Bromoacetonitrile	590-17-0	BrCC#N	41.73	119.95	5.00551	Muellner et al.2007
281	Dibromoacetonitrile	3252-43-5	BrC(Br)C#N	44.2	198.84	8.78873	Muellner et al.2007
283	Bromochloroacetonitrile	83463-62-1	ClC(Br)C#N	299.37	154.39	46.2197	Muellner et al.2007
279	Chloroacetonitrile	107-14-2	ClCC#N	573.3	75.5	43.2841	Richardson et al. 2008
282	Dichloroacetonitrile	3018-12-0	ClC(Cl)C#N	2834.75	109.94	311.652	Richardson et al. 2008
287	Trichloroacetonitrile	545-06-2	ClC(Cl)(Cl)C#N	1054.25	144.38	152.213	Muellner et al.2007
289	Cyanogen Bromide	506-68-3	BrC#N	500	105.92	52.96	Pals et al. 2009
291	Cyanogen Iodide	506-78-5	IC#N	214	152.922	32.7253	Pals et al. 2009
678	5-Amino-N1,N3-Bis(1,3-Dihydroxypropan-2-Yl)-2,4,6-Triiodoisophthalamide	60166-98-5	C(C(CO)NC(=O)C1=C(C(=C(C(=C1I)N)I)C(=O)NC(CO)CO)I)O	NS	705.02	Negative	Wendel et al. 2016
680	2-(3,5-Bis((1,3-Dihydroxypropan-2-Yl)Carbamoyl)-2,4,6- Triiodophenoxy) Propanoic Acid	1877263-83-6	O=C(O)C(OC=1C(I)=C(C(=O)NC(CO)CO)C(I)=C(C(=O)NC(CO)CO)C1I)C	NS	778.1	Negative	Wendel et al. 2016
679	N1,N3-Bis(1,3-Dihydroxy-Propan-2-Yl)-2,4,6-Triiodo-5-Nitroisophthalamide	1877263-84-7	O=C(NC(CO)CO)C=1C(I)=C(C(=O)NC(CO)CO)C(I)=C(C1I)N(=O)=O	NS	735.01	Negative	Wendel et al. 2016
677	4-Chloro-N1,N3-Bis(1,3-Dihydroxypropan-2-Yl)-2,6-Diiodo-5-Nitroiso-Phthalamide	1877263-85-8	O=C(NC(CO)CO)C=1C(Cl)=C(C(I)=C(C(=O)NC(CO)CO)C1I)N(=O)=O	NS	643.55	Negative	Wendel et al. 2016
676	4,6-Dichloro-N1,N3-Bis(1,3-Dihydroxypropan-2-Yl)-2-Iodo-5-Nitroisophthalamide	1877263-86-9	O=C(NC(CO)CO)C=1C(Cl)=C(C(Cl)=C(C(=O)NC(CO)CO)C1I)N(=O)=O	NS	552.1	Negative	Wendel et al. 2016
286	Tribromoacetonitrile	75519-19-6	BrC(Br)(Br)C#N	37.76	277.74	10.4875	Cristina Postigo et al.2018
284	Bromodichloroacetonitrile	60523-73-1	ClC(Cl)(Br)C#N	163.29	188.84	30.8357	Cristina Postigo et al.2018
285	Chlorodibromoacetonitrile	144772-39-4	ClC(Br)(Br)C#N	139.73	233.29	32.5976	Cristina Postigo et al.2018
1647	2-chloroadenine	1839-18-5	Nc1nc(Cl)nc2nc[nH]c12	760	169.57	128.873	Guangrong Sun et al.2023
1645	5-chlorouracil	1820-81-1	ClC1=CNC(=O)NC1=O	490	146.53	71.7997	Guangrong Sun et al.2023
1649	5-bromouracil	51-20-7	BrC1=CNC(=O)NC1=O	720	190.98	137.506	Guangrong Sun et al.2023
1646	6-chlorouracil	4270-27-3	ClC1NC(=O)NC(=O)C=1	4300	146.53	630.079	Guangrong Sun et al.2023
1789	5-bromouridine	957-75-5	OC[C@H]1O[C@H]([C@H](O)[C@@H]1O)N1C=C(Br)C(=O)NC1=O	720	323.1	232.632	Guangrong Sun et al.2023
1790	1-Dimethoxyphosphorylsulfanyl-2-ethylsulfinylethane	301-12-2	CC[S+]([O-])CCSP(=O)(OC)OC	Positive	246.3	Positive	QSAR toolbox
1791	(2,4-dichloro-phenoxy)-acetic acid	94-75-7	C1=CC(=C(C=C1Cl)Cl)OCC(=O)O	Positive	221.03	Positive	QSAR toolbox
1792	2-Oxiranemethanol	556-52-5	OCC1CO1	Positive	74.08	Positive	QSAR toolbox
800	4-chlorophenol	106-48-9	C1=CC(=CC=C1O)Cl	Negative	128.55	Negative	Mengge Fan et al.2022
1793	3,6-dichloro-2-methoxybenzoic acid	1918-00-9	COC1=C(C=CC(=C1C(=O)O)Cl)Cl	Negative	221.03	Negative	QSAR toolbox
1794	3-Chloro-1,2-propanediol	96-24-2	OCC(O)CCl	Positive	110.54	Positive	QSAR toolbox
1795	Potassium iodide	7681-11-0	[K+].[I-]	Negative	166.003	Negative	QSAR toolbox
1796	Iodic acid	7758-05-6	[K+].[O-]I(=O)=O	Negative	214.001	Negative	QSAR toolbox
1553	2-chloro-1,4-benzoquinone	695-99-8	C1=CC(=O)C(=CC1=O)Cl	Positive	142.54	Positive	Moe. Et al. 2016
1005	2,3,6-trichloro-1,4-benzoquinone	634-85-5	C1=C(C(=O)C(=C(C1=O)Cl)Cl)Cl	Positive	211.4	Positive	Moe. Et al. 2016
1007	tetrachloro-1,4benzoquinone	118-75-2	C1(=C(C(=O)C(=C(C1=O)Cl)Cl)Cl)Cl	Positive	245.9	Positive	Moe. Et al. 2016
1014	2,5-dichloro-1,4-benzoquinone	615-93-0	C1=C(C(=O)C=C(C1=O)Cl)Cl	Positive	176.98	Positive	Moe. Et al. 2016
1018	2,6-dichloro-1,4-benzoquinone	697-91-6	C1=C(C(=O)C(=CC1=O)Cl)Cl	Positive	176.98	Positive	Moe. Et al. 2016
1015	2,5-dibromo-1,4-benzoquinone	1633-14-3	C1=C(C(=O)C=C(C1=O)Br)Br	Positive	265.89	Positive	Moe. Et al. 2016
1019	2,6-dibromo-1,4-benzoquinone	19643-45-9	C1=C(C(=O)C(=CC1=O)Br)Br	Positive	265.89	Positive	Moe. Et al. 2016
1797	2,3-diiodo-1,4-benzoquinone	222417-90-5	O=C1C=CC(=O)C(I)=C1I	Positive	359.89	Positive	Moe. Et al. 2016
1155	N-nitrosopiperidine	100-75-4	C1CCN(CC1)N=O	Positive	114.15	Positive	Wagner. Et al. 2012
1154	N-nitrosopyrrolidine	930-55-2	C1CCN(C1)N=O	Nagative	100.12	Negative	Wagner. Et al. 2012
647	N-nitrosodiphenylamine	86-30-6	C1=CC=C(C=C1)N(C2=CC=CC=C2)N=O	Positive	198.22	Positive	Wagner. Et al. 2012
Some substances have identical SMILES codes (because they are isomers) but different CAS numbers. We decided to consider them as different DBPs.
All "No." follows Table S6 "Updated DBPs Inventory"
Reference articles		Full name
Plewa et al. 2002		Plewa, M. J.; Kargalioglu, Y.; Vankerk, D.; Minear, R. A.; Wagner, E. D. Mammalian cell cytotoxicity and genotoxicity analysis of drinking water disinfection by‐products. Environ. Mol. Mutagen. 2002, 40 (2), 134–142. DOI: 10.1002/em.10092
Plewa et al. 2004a		Plewa, M. J.; Wagner, E. D.; Jazwierska, P.; Richardson, S. D.; Chen, P. H.; McKague, A. B. Halonitromethane Drinking Water Disinfection Byproducts: Chemical Characterization and Mammalian Cell Cytotoxicity and Genotoxicity. Environ. Sci. Technol. 2004, 38 (1), 62–68. DOI: 10.1021/es030477l.
Plewa et al. 2004b		Plewa, M. J.; Wagner, E. D.; Richardson, S. D.; Thruston, A. D.; Woo, Y.-T.; McKague, A. B. Chemical and biological characterization of newly discovered iodoacid drinking water disinfection byproducts. Environ. Sci. Technol. 2004, 38 (18), 4713–4722. DOI: 10.1021/es049971v.
Plewa et al. 2008		Plewa, M. J.; Muellner, M. G.; Richardson, S. D.; Fasano, F.; Buettner, K. M.; Woo, Y.-T.; McKague, A. B.; Wagner, E. D. Occurrence, Synthesis, and Mammalian Cell Cytotoxicity and Genotoxicity of Haloacetamides: An Emerging Class of Nitrogenous Drinking Water Disinfection Byproducts. Environ. Sci. Technol. 2008, 42 (3), 955–961. DOI: 10.1021/es071754h.
Plewa et al. 2010		Plewa, M. J.; Simmons, J. E.; Richardson, S. D.; Wagner, E. D. Mammalian cell cytotoxicity and genotoxicity of the haloacetic acids, a major class of drinking water disinfection by-products. Environ. Mol. Mutagen. 2010, 51 (8–9), 871–878. DOI: 10.1002/em.20585.
Plewa and Wagner. 2009		Plewa, M. J. & Wagner, E. D. Mammalian Cell Cytotoxicity And Genotoxicity Of Disinfection By-Products. Water Research Foundation. 2009, https://repository.library.noaa.gov/view/noaa/42356 (accessed Mar.1, 2025)
Wagner et al. 2014		Wagner, E. D.; Osiol, J.; Mitch, W. A.; Plewa, M. J. Comparative in vitro toxicity of nitrosamines and nitramines associated with amine-based carbon capture and storage. Environ. Sci. Technol. 2014, 48 (14), 8203–8211. DOI: 10.1021/es5018009.
Richardson et al. 2003		Richardson, S. D. et al. Richardson, S. D.; Thruston, A. D.; Rav-Acha, C.; Groisman, L.; Popilevsky, I.; Juraev, O.; Glezer, V.; McKague, A. B.; Plewa, M. J.; Wagner, E. D. Tribromopyrrole, brominated acids, and other disinfection byproducts produced by disinfection of drinking water rich in bromide. Environ. Sci. Technol. 2003, 37 (17), 3782–3793. DOI: 10.1021/es030339w. by disinfection of drink…
Richardson et al. 2008		Richardson, S. D.; Fasano, F.; Ellington, J. J.; Crumley, F. G.; Buettner, K. M.; Evans, J. J.; Blount, B. C.; Silva, L. K.; Waite, T. J.; Luther, G. W.; McKague, A. B.; Miltner, R. J.; Wagner, E. D.; Plewa, M. J. Occurrence and mammalian cell toxicity of iodinated disinfection byproducts in drinking water. Environ. Sci. Technol. 2008, 42 (22), 8330–8338. DOI: 10.1021/es801169k.
Jeong et al. 2015		Jeong, C. H.; Postigo, C.; Richardson, S. D.; Simmons, J. E.; Kimura, S. Y.; Mariñas, B. J.; Barcelo, D.; Liang, P.; Wagner, E. D.; Plewa, M. J. Occurrence and Comparative Toxicity of Haloacetaldehyde Disinfection Byproducts in Drinking Water. Environ. Sci. Technol. 2015, 49 (23), 13749–13759. DOI: 10.1021/es506358x.
Muellner et al.2007		Muellner, M. G.; Wagner, E. D.; McCalla, K.; Richardson, S. D.; Woo, Y.-T.; Plewa, M. J. Haloacetonitriles vs. Regulated Haloacetic Acids: Are Nitrogen-Containing DBPs More Toxic? Environ. Sci. Technol. 2007, 41 (2), 645–651. DOI: 10.1021/es0617441.
Pals et al. 2009		Komaki, Y.; Pals, J.; Wagner, E. D.; Mariñas, B. J.; Plewa, M. J. Mammalian Cell DNA Damage and Repair Kinetics of Monohaloacetic Acid Drinking Water Disinfection By-Products. Environ. Sci. Technol. 2009, 43 (21), 8437–8442. DOI: 10.1021/es901852z.
Wendel et al. 2016		Wendel, F. M.; Ternes, T. A.; Richardson, S. D.; Duirk, S. E.; Pals, J. A.; Wagner, E. D.; Plewa, M. J. Comparative toxicity of high-molecular weight iopamidol disinfection byproducts. Environ. Sci. Technol. Lett. 2016, 3 (3), 81–84. DOI: 10.1021/acs.estlett.6b00037.
Cristina Postigo et al.2018		Postigo, C.; Emiliano, P.; Barceló, D.; Valero, F. Chemical characterization and relative toxicity assessment of disinfection byproduct mixtures in a large drinking water supply network. J. Hazard. Mater. 2018, 359, 166–173. DOI: 10.1016/j.jhazmat.2018.07.022.
Guangrong Sun et al.2023		Sun, G.; Guo, P.; Kaw, H. Y.; Zhou, M.; Wang, W. Uncovering an emerging group of halogenated nucleobase-derived disinfection byproducts in drinking water: prioritization of the highly cytotoxic 2-chloroadenine. Environ. Sci. Technol. 2023, 57 (23), 8768–8775. DOI: 10.1021/acs.est.3c01484
QSAR toolbox		Dimitrov, S. D.; Diderich, R.; Sobanski, T.; Pavlov, T. S.; Chankov, G. V.; Chapkanov, A. S.; Karakolev, Y. H.; Temelkov, S. G.; Vasilev, R. A.; Gerova, K. D.; Kuseva, C. D.; Todorova, N. D.; Mehmed, A. M.; Rasenberg, M.; Mekenyan, O. G. QSAR toolbox - workflow and major functionalities. SAR QSAR Environ. Res. 2016, 27 (3), 203–219. DOI: 10.1080/1062936X.2015.1136680.
Mengge Fan et al.2022		Fan, M.; Shu, L.; Zhang, X.; Yu, M.; Du, Y.; Qiu, J.; Yang, X. Synergistic cytotoxicity of binary combinations of inorganic and organic disinfection byproducts assessed by real-time cell analysis. J. Environ. Sci. 2022, 117, 222–231. DOI: 10.1016/j.jes.2022.04.042
Moe. Et al. 2016		Li, J.; Moe, B.; Vemula, S.; Wang, W.; Li, X.-F. Emerging Disinfection Byproducts, Halobenzoquinones: Effects of Isomeric Structure and Halogen Substitution on Cytotoxicity, Formation of Reactive Oxygen Species, and Genotoxicity. Environ. Sci. Technol. 2016, 50 (13), 6744–6752. DOI: 10.1021/acs.est.5b05585.
Wagner. Et al. 2012		Wagner, E. D.; Hsu, K.-M.; Lagunas, A.; Mitch, W. A.; Plewa, M. J. Comparative genotoxicity of nitrosamine drinking water disinfection byproducts in salmonella and mammalian cells. Mutat. Res./genet. Toxicol. Environ. Mutagen. 2012, 741 (1–2), 109–115. DOI: 10.1016/j.mrgentox.2011.11.006.

## Sheet: Table S6
Table S6 Updated DBPs Inventory
Total:1816	No.	CAS NO	Name	SMILES	MolecularWeight	Reference articles
1-original	1	124-40-3	Dimethylamine	N(C)C	45.08	Shuxin Sui et al.2024
Number: 1187	2	594-72-9	1,1-Dichloor-1-nitroeithaan	C(N(=O)=O)(C)(Cl)Cl	143.95	Shuxin Sui et al.2024
	3	6145-42-2	N,N-Dimethyl-Guanidine	C(=N)(N(C)C)N	87.12	Shuxin Sui et al.2024
	4	89214-90-4	3-Heptanamine, N-​ethyl-​3-​methyl-	C(CCCC)(NCC)(CC)C	157.3	Shuxin Sui et al.2024
	5	51-75-2	Chlormethine	N(CCCl)(CCCl)C	156.05	Shuxin Sui et al.2024
	6	112-18-5	N,N-Dimethyldodecylamine	C(CCCCCCCCC)CCN(C)C	213.4	Shuxin Sui et al.2024
	7	7311-30-0	N-METHYLDODECYLAMINE	C(CCCCCNC)CCCCCC	199.38	Shuxin Sui et al.2024
	8	10595-95-6	N-nitrosomethy-lethylamine	N(CC)(N=O)C	88.11	Shuxin Sui et al.2024
	9	55-18-5	N-nitrosodiethylamine	N(CC)(CC)N=O	102.14	Shuxin Sui et al.2024
	10	64768-29-2	N-Nitrosomethanamine	N(N=O)C	60.056	Shuxin Sui et al.2024
	11	621-64-7	N-nitrosodi-n-propyl-amine	N(CCC)(CCC)N=O	130.19	Shuxin Sui et al.2024
	12	924-16-3	N-nitrosodi-n-butylamine	N(CCCC)(CCCC)N=O	158.24	Shuxin Sui et al.2024
	13	62-75-9	N-nitrosodimethylamine	N(N=O)(C)C	74.08	Shuxin Sui et al.2024
	14	1116-54-7	N-nitrosodiethanolamine	N(CCO)(CCO)N=O	134.13	Shuxin Sui et al.2024
	15	4164-28-7	N-nitrodimethylamine	N(N(=O)=O)(C)C	90.08	Shuxin Sui et al.2024
	16	4185-47-1	N-nitrodiethanolamine	N(CCON(=O)=O)(CCON(=O)=O)N(=O)=O	240.13	Shuxin Sui et al.2024
	17	72884-67-4	1-Pentanamine, N-nitro-	C(NN(=O)=O)CCCC	132.16	Shuxin Sui et al.2024
	18	97-72-3	Isobutyric anhydride	C(=O)(OC(=O)C(C)C)C(C)C	158.19	Shuxin Sui et al.2024
	19	1519-23-9	2-methylbutyric anhydride	C(=O)(OC(=O)C(CC)C)C(CC)C	186.25	Shuxin Sui et al.2024
	20	626-27-7	Heptanoyl anhydride	O(C(=O)CCCCCC)C(=O)CCCCCC	242.35	Shuxin Sui et al.2024
	21	2051-49-2	Hexanoic anhydride	O(C(=O)CCCCC)C(=O)CCCCC	214.3	Shuxin Sui et al.2024
	22	108-24-7	Acetic anhydride	O(C(=O)C)C(=O)C	102.09	Shuxin Sui et al.2024
	23	106-31-0	Butyric anhydride	C(=O)(OC(=O)CCC)CCC	158.19	Shuxin Sui et al.2024
	24	123-62-6	Propionic anhydride	O(C(=O)CC)C(=O)CC	130.14	Shuxin Sui et al.2024
	25	63169-61-9	2-Methylpentanoic anhydride	O(C(=O)C(CCC)C)C(=O)C(CCC)C	214.3	Shuxin Sui et al.2024
	26	2902-96-7	2-Nitro-1-propanol	C(N(=O)=O)(CO)C	105.09	Shuxin Sui et al.2024
	27	996-08-7	di-n-Butyldibrmotin	[Sn](CCCC)(CCCC)(Br)Br	392.75	Shuxin Sui et al.2024
	28	1461-23-0	Tributylbromostannane	[Sn](CCCC)(CCCC)(CCCC)Br	369.96	Shuxin Sui et al.2024
	29	78-51-3	Tris(2-butoxyethyl) phosphate	P(=O)(OCCOCCCC)(OCCOCCCC)OCCOCCCC	398.5	Shuxin Sui et al.2024
	30	2089238-10-6	-	C(=N\C#N)(/N(C)C)\Cl	131.56	Shuxin Sui et al.2024
	31	27126-22-3	4-Azidoheptane	C(CCC)(CCC)N=[N+]=[N-]	141.21	Shuxin Sui et al.2024
	32	48069-15-4	N-Hydroxy-N,N-dimethyl-1-dodecanaminium	C(CCCCCCCCC)CC[N+](C)(C)O	230.41	Shuxin Sui et al.2024
	33	19781-86-3	8-Hexadecyne	C(#CCCCCCCC)CCCCCCC	222.41	Shuxin Sui et al.2024
	34	13425-80-4	Dichloroacetate	C(C(=O)[O-])(Cl)Cl	127.93	Shuxin Sui et al.2024
	35	124-63-0	Methanesulfonyl chloride	S(=O)(=O)(C)Cl	114.55	Shuxin Sui et al.2024
	36	542-58-5	1-Acetoxy-2-chloroethane	O(C(=O)C)CCCl	122.55	Shuxin Sui et al.2024
	37	20428-74-4	Acetic acid, 2-bromo-​2-​chloro-​, methyl ester	C(=O)(C(Br)Cl)OC	187.42	Shuxin Sui et al.2024
	38	116-54-1	Dichloroacetic acid methyl ester	C(=O)(C(Cl)Cl)OC	142.97	Shuxin Sui et al.2024
	39	6482-26-4	Methyl 2,2-Dibromoacetate	C(=O)(C(Br)Br)OC	231.87	Shuxin Sui et al.2024
	40	54192-20-0	2-Butanol, 3-chloro-, acetate, (2R,3R)-rel- (9CI)	[C@H](OC(=O)C)([C@@H](C)Cl)C	150.6	Shuxin Sui et al.2024
	41	563-70-2	Bromonitromethane	N(=O)(=O)CBr	139.94	Shuxin Sui et al.2024
	42	1794-84-9	Chloronitromethane	N(=O)(=O)CCl	95.48	Shuxin Sui et al.2024
	43	598-91-4	Dibromonitromethane	C(N(=O)=O)(Br)Br	218.83	Shuxin Sui et al.2024
	44	7119-89-3	Dichloronitromethane	C(N(=O)=O)(Cl)Cl	129.93	Shuxin Sui et al.2024
	45	135531-25-8	Bromochloronitromethane	C(N(=O)=O)(Br)Cl	174.38	Shuxin Sui et al.2024
	46	464-10-8	Tribromonitromethane	C(N(=O)=O)(Br)(Br)Br	297.73	Shuxin Sui et al.2024
	47	76-06-2	Trichloronitromethane	C(N(=O)=O)(Cl)(Cl)Cl	164.37	Shuxin Sui et al.2024
	48	918-01-4	Bromodichloronitromethane	C(N(=O)=O)(Br)(Cl)Cl	208.82	Shuxin Sui et al.2024
	49	1184-89-0	Dibromochloronitromethane	C(N(=O)=O)(Br)(Br)Cl	253.28	Shuxin Sui et al.2024
	50	17756-81-9	2-chloro-n-(2-cyanoethyl)-acetamid	C(=O)(NCCC#N)CCl	146.57	Shuxin Sui et al.2024
	51	79-07-2	Chloroacetamide	C(=O)(CCl)N	93.51	Shuxin Sui et al.2024
	52	683-57-8	Bromoacetamide	C(=O)(CBr)N	137.96	Shuxin Sui et al.2024
	53	144-48-9	Iodoacetamide	C(=O)(CI)N	184.96	Shuxin Sui et al.2024
	54	598-70-9	Dibromoacetamide	C(C(=O)N)(Br)Br	216.86	Shuxin Sui et al.2024
	55	683-72-7	Dichloroacetamide	C(C(=O)N)(Cl)Cl	127.95	Shuxin Sui et al.2024
	56	5875-23-0	Diiodoacetamide	C(C(=O)N)(I)I	310.86	Shuxin Sui et al.2024
	57	62872-36-0	Bromoiodoacetamide	C(C(=O)N)(Br)I	263.86	Shuxin Sui et al.2024
	58	62872-35-9	Chloroiodoacetamide	C(C(=O)N)(Cl)I	219.41	Shuxin Sui et al.2024
	59	594-47-8	Tribromoacetamide	C(C(=O)N)(Br)(Br)Br	295.76	Shuxin Sui et al.2024
	60	62872-34-8	Bromochloroacetamide	C(C(=O)N)(Br)Cl	172.41	Shuxin Sui et al.2024
	61	98137-00-9	Bromodichloroacetamide	C(C(=O)N)(Br)(Cl)Cl	206.85	Shuxin Sui et al.2024
	62	594-65-0	Trichloroacetamide	C(C(=O)N)(Cl)(Cl)Cl	162.4	Shuxin Sui et al.2024
	63	19433-84-2	2,3-Dichloropropamide	C(C(=O)N)(CCl)Cl	141.98	Shuxin Sui et al.2024
	64	855878-13-6	Dibromochloroacetamide	C(C(=O)N)(Br)(Br)Cl	251.3	Shuxin Sui et al.2024
	65	127-18-4	Tetrachloroethylene	C(=C(Cl)Cl)(Cl)Cl	165.8	Shuxin Sui et al.2024
	66	79-01-6	Trichloroethylene	C(=CCl)(Cl)Cl	131.38	Shuxin Sui et al.2024
	67	75-35-4	1,1-dichloro-ethylen	C(=C)(Cl)Cl	96.94	Shuxin Sui et al.2024
	68	156-59-2	1,2-cis-Dichloroethylene	C(=C\Cl)\Cl	96.94	Shuxin Sui et al.2024
	69	75-01-4	Vinyl chloride	C(=C)Cl	62.5	Shuxin Sui et al.2024
	70	156-60-5	trans-1, 2-Dichloroethylene	C(=C\Cl)/Cl	96.94	Shuxin Sui et al.2024
	71	4749-27-3	3,3,3-Trichloro-2-methyl-1-propene	C(C(=C)C)(Cl)(Cl)Cl	159.44	Shuxin Sui et al.2024
	72	55030-57-4	2,4-Dibromo-1-butene	C(C(=C)Br)CBr	213.9	Shuxin Sui et al.2024
	73	74-97-5	Bromochloromethane	C(Br)Cl	129.38	Shuxin Sui et al.2024
	74	71-55-6	1,1,1-Trichloroethane	C(C)(Cl)(Cl)Cl	133.4	Shuxin Sui et al.2024
	75	594-15-0	Tribromochloromethane	C(Br)(Br)(Br)Cl	287.17	Shuxin Sui et al.2024
	76	74-95-3	Dibromomethane	C(Br)Br	173.83	Shuxin Sui et al.2024
	77	7789-89-1	1,1,1-Trichloropropane	C(CC)(Cl)(Cl)Cl	147.43	Shuxin Sui et al.2024
	78	106-93-4	1,2-Dibromoethane	C(CBr)Br	187.86	Shuxin Sui et al.2024
	79	593-71-5	Chloroiodomethane	C(Cl)I	176.38	Shuxin Sui et al.2024
	80	74-87-3	Methyl chloride	CCl	50.49	Shuxin Sui et al.2024
	81	75-34-3	1,1-Dichloroethane	C(C)(Cl)Cl	98.96	Shuxin Sui et al.2024
	82	96-18-4	1,2,3-Trichloropropane	C(CCl)(CCl)Cl	147.43	Shuxin Sui et al.2024
	83	96-12-8	1,2-Dibromo-3-chloropropane	C(CBr)(CCl)Br	236.33	Shuxin Sui et al.2024
	84	107-06-2	1,2-Dichloroethane	C(CCl)Cl	98.96	Shuxin Sui et al.2024
	85	7581-97-7	2,3-Dichlorobutane	C(C(C)Cl)(C)Cl	127.01	Shuxin Sui et al.2024
	86	75-11-6	Diiodomethane	C(I)I	267.835	Shuxin Sui et al.2024
	87	379226-03-6	Ethane, 1,1,1,2-tetrabromo-2-chloro-	C(C(Br)Cl)(Br)(Br)Br	380.1	Shuxin Sui et al.2024
	88	56-23-5	Carbon tetrachloride	C(Cl)(Cl)(Cl)Cl	153.8	Shuxin Sui et al.2024
	89	111-85-3	1-Chlorooctane	C(CCCC)CCCCl	148.67	Shuxin Sui et al.2024
	90	2425-54-9	1-Chlorotetradecane	C(CCCCCCC)CCCCCCCl	232.83	Shuxin Sui et al.2024
	91	2350-11-0	2-chlorododecane	C(CCCCCC)CCCC(C)Cl	204.78	Shuxin Sui et al.2024
	92	7735-39-9	Hexadecane, 1,16-dichloro-	C(CCCCCCCCCl)CCCCCCCCl	295.3	Shuxin Sui et al.2024
	93	79-00-5	1,1,2-Trichloroethane	C(CCl)(Cl)Cl	133.4	Shuxin Sui et al.2024
	94	76-13-1	1,1,2-Trichlorotrifluoroethane	C(C(Cl)(F)F)(Cl)(Cl)F	187.37	Shuxin Sui et al.2024
	95	598-17-4	1,1-dibromopropane	C(CC)(Br)Br	201.89	Shuxin Sui et al.2024
	96	598-20-9	Ethane, 1,2-dibromo-1-chloro-	C(CBr)(Br)Cl	222.3	Shuxin Sui et al.2024
	97	111-25-1	1-Bromohexane	C(CCBr)CCC	165.07	Shuxin Sui et al.2024
	98	112-52-7	1-Chlorododecane	C(CCCCCC)CCCCCCl	204.78	Shuxin Sui et al.2024
	99	78-76-2	2-Bromobutane	C(CC)(Br)C	137.02	Shuxin Sui et al.2024
	100	999-07-5	4-chloro-octan	C(CCCC)(CCC)Cl	148.67	Shuxin Sui et al.2024
	101	75-62-7	Bromotrichloromethane	C(Br)(Cl)(Cl)Cl	198.27	Shuxin Sui et al.2024
	102	594-18-3	Dibromodichloromethane	C(Br)(Br)(Cl)Cl	242.72	Shuxin Sui et al.2024
	103	3377-86-4	Hexane,2-bromo-	C(C(Br)C)CCC	165.07	Shuxin Sui et al.2024
	104	17655-64-0	Pentane,1,1,5,5-tetrachloro-	C(CC(Cl)Cl)CC(Cl)Cl	209.9	Shuxin Sui et al.2024
	105	23010-04-0	1,2-dichloro-2-methylbutane	C(CC)(CCl)(C)Cl	141.04	Shuxin Sui et al.2024
	106	67-72-1	Hexachloroethane	C(C(Cl)(Cl)Cl)(Cl)(Cl)Cl	236.7	Shuxin Sui et al.2024
	107	73105-67-6	Undecane, 1-iodo-2-methyl-	C(CCCCCCCC)C(CI)C	296.23	Shuxin Sui et al.2024
	108	3405-32-1	1,2,3,4-tetrachloro-butan	C(C(CCl)Cl)(CCl)Cl	195.9	Shuxin Sui et al.2024
	109	23010-05-1	Butane, 1,1-dichloro-2-methyl-	C(C(Cl)Cl)(CC)C	141.04	Shuxin Sui et al.2024
	110	128399-51-9	Octane, 3-chloro-	C(CCCCC)(CC)Cl	148.67	Shuxin Sui et al.2024
	111	638-73-3	Chlorodiiodomethane	C(Cl)(I)I	302.28	Shuxin Sui et al.2024
	112	75-47-8	Triiodomethane	C(I)(I)I	393.732	Shuxin Sui et al.2024
	113	593-94-2	Dibromoiodomethane	C(Br)(Br)I	299.73	Shuxin Sui et al.2024
	114	34970-00-8	Bromochloroiodomethane	C(Br)(Cl)I	255.28	Shuxin Sui et al.2024
	115	75-25-2	Tribromomethane	C(Br)(Br)Br	252.73	Shuxin Sui et al.2024
	116	124-48-1	Chlorodibromomethane	C(Br)(Br)Cl	208.28	Shuxin Sui et al.2024
	117	67-66-3	Trichloromethane	C(Cl)(Cl)Cl	119.37	Shuxin Sui et al.2024
	118	75-27-4	Bromodichloromethane	C(Br)(Cl)Cl	163.83	Shuxin Sui et al.2024
	119	594-04-7	Dichloroiodomethane	C(Cl)(Cl)I	210.83	Shuxin Sui et al.2024
	120	557-95-9	Bromodiiodomethane	C(Br)(I)I	346.73	Shuxin Sui et al.2024
	121	78-75-1	1,2dibromopropane	C(CBr)(Br)C	201.89	Shuxin Sui et al.2024
	122	75-09-2	Methylenechloride	C(Cl)Cl	84.93	Shuxin Sui et al.2024
	123	1751-16-2	1-BroMo-1,1-dichloro-2-propanone	C(C(=O)C)(Br)(Cl)Cl	205.86	Shuxin Sui et al.2024
	124	3475-39-6	1,1,3-Tribromoacetone	C(=O)(C(Br)Br)CBr	294.77	Shuxin Sui et al.2024
	125	78-95-5	Chloroacetone	C(=O)(CCl)C	92.52	Shuxin Sui et al.2024
	126	921-03-9	1,1,3-Trichloroacetone	C(=O)(C(Cl)Cl)CCl	161.41	Shuxin Sui et al.2024
	127	55716-01-3	1,1,3-Tribromo-3-chloroacetone	C(=O)(C(Br)Br)C(Br)Cl	329.21	Shuxin Sui et al.2024
	128	62874-83-3	1,1-Dibromo-3,3-dichloroacetone	C(=O)(C(Br)Br)C(Cl)Cl	284.76	Shuxin Sui et al.2024
	129	867-54-9	1,1-Dibromoacetone	C(C(=O)C)(Br)Br	215.87	Shuxin Sui et al.2024
	130	62874-84-4	1,3-Dibromo-1,3-dichloroacetone	C(=O)(C(Br)Cl)C(Br)Cl	284.76	Shuxin Sui et al.2024
	131	5559-62-6	1-chlorobutane-2,3-dione	C(=O)(C(=O)C)CCl	120.53	Shuxin Sui et al.2024
	132	815-01-0	2-Butanone, 1,1,1-trichloro-	C(=O)(C(Cl)(Cl)Cl)CC	175.44	Shuxin Sui et al.2024
	133	1768-31-6	pentachloroacetone	C(=O)(C(Cl)(Cl)Cl)C(Cl)Cl	230.3	Shuxin Sui et al.2024
	134	3770-98-7	2-Propanone, 1,1,1-tribromo-	C(C(=O)C)(Br)(Br)Br	294.77	Shuxin Sui et al.2024
	135	1578-18-3	2-Propanone, 1,1-dibromo-3-chloro-	C(=O)(C(Br)Br)CCl	250.31	Shuxin Sui et al.2024
	136	816-40-0	1-bromo-2-butanon	C(=O)(CBr)CC	151	Shuxin Sui et al.2024
	137	616-27-3	1-chlorobutan-2-one	C(=O)(CC)CCl	106.55	Shuxin Sui et al.2024
	138	16995-35-0	Tetrachloroacetone	C(=O)(C(Cl)(Cl)Cl)CCl	195.9	Shuxin Sui et al.2024
	139	2648-56-8	2-Butanone,1,1-dichloro-	C(=O)(C(Cl)Cl)CC	140.99	Shuxin Sui et al.2024
	140	2648-57-9	3,3-dichlorobutan-2-one	C(C(=O)C)(C)(Cl)Cl	140.99	Shuxin Sui et al.2024
	141	3884-71-7	2-Pentanone, 5-bromo-	C(C(=O)C)CCBr	165.03	Shuxin Sui et al.2024
	142	4091-39-8	3-Chloro-2-butanone	C(C(=O)C)(C)Cl	106.55	Shuxin Sui et al.2024
	143	23162-65-4	2-Propanone, 1,​1,​1,​3,​3-​pentabromo-​3-​chloro-	C(=O)(C(Br)(Br)Br)C(Br)(Br)Cl	487	Shuxin Sui et al.2024
	144	72007-33-1	2-Propanone, 1-bromo-1-chloro-	C(C(=O)C)(Br)Cl	171.42	Shuxin Sui et al.2024
	145	73651-50-0	3-Pentanone, 2,2-dichloro-	C(=O)(C(C)(Cl)Cl)CC	155.02	Shuxin Sui et al.2024
	146	247147-89-3	2-Propanone, 1,​1,​1,​3-​tetrabromo-​3-​chloro-	C(=O)(C(Br)(Br)Br)C(Br)Cl	408.11	Shuxin Sui et al.2024
	147	814-75-5	3-bromo-2-butanon	C(C(=O)C)(Br)C	151	Shuxin Sui et al.2024
	148	62874-82-2	2-Propanone, 1-bromo-1,3,3-trichloro-	C(=O)(C(Br)Cl)C(Cl)Cl	240.31	Shuxin Sui et al.2024
	149	16714-77-5	1,3-dichlorobutan-2-one	C(=O)(C(C)Cl)CCl	140.99	Shuxin Sui et al.2024
	150	52945-79-6	2-Butanone, 1,​1,​3-​trichloro-	C(=O)(C(C)Cl)C(Cl)Cl	175.44	Shuxin Sui et al.2024
	151	64697-38-7	1,3,3-trichlorobutan-2-one	C(=O)(C(C)(Cl)Cl)CCl	175.44	Shuxin Sui et al.2024
	152	74600-02-5	3-Pentanone, 2,​2,​4-​trichloro-	C(=O)(C(C)(Cl)Cl)C(C)Cl	189.46	Shuxin Sui et al.2024
	153	683-70-5	3-Buten-2-one, 3-chloro-	C(=C)(C(=O)C)Cl	104.53	Shuxin Sui et al.2024
	154	5682-80-4	3-Penten-2-one, 3-bromo-4-methyl-	C(=C(C)C)(C(=O)C)Br	177.04	Shuxin Sui et al.2024
	155	51116-72-4	3-Methylvaleric acid chloride	C(CC(=O)Cl)(CC)C	134.6	Shuxin Sui et al.2024
	156	116-16-5	Hexachloroacetone	C(=O)(C(Cl)(Cl)Cl)C(Cl)(Cl)Cl	264.7	Shuxin Sui et al.2024
	157	918-00-3	1,1,1-tricloroacetone	C(C(=O)C)(Cl)(Cl)Cl	161.41	Shuxin Sui et al.2024
	158	513-88-2	1-1-dichloropropanone	C(=O)(C(Cl)Cl)C	126.97	Shuxin Sui et al.2024
	159	598-31-2	Bromoacetone	C(=O)(CBr)C	136.98	Shuxin Sui et al.2024
	160	534-07-6	1,3-Dichloropropanone	C(=O)(CCl)CCl	126.97	Shuxin Sui et al.2024
	161	632-21-3	1,1,3,3-Tetrachloropropanone	C(=O)(C(Cl)Cl)C(Cl)Cl	195.9	Shuxin Sui et al.2024
	162	22612-89-1	1,1,3,3-Tetrabromopropanone	C(=O)(C(Br)Br)C(Br)Br	373.66	Shuxin Sui et al.2024
	163	1561-20-2	3,3-Dichloropropenoic acid	C(=C(Cl)Cl)C(=O)O	140.95	Shuxin Sui et al.2024
	164	594-68-3	Triiodoaceticacid	C(C(=O)O)(I)(I)I	437.74	Shuxin Sui et al.2024
	165	126572-80-3	(E)-2-Chloro-3-(dichloromethyl)butenedioic acid	C(=C(\C(=O)O)/Cl)(\C(Cl)Cl)/C(=O)O	233.43	Shuxin Sui et al.2024
	166	75-99-0	2,2-Dichloropropionic acid	C(C(=O)O)(C)(Cl)Cl	142.97	Shuxin Sui et al.2024
	167	115340-67-5	2-chloro-3-(dichloromethyl)-4-oxobutenoic acid	C(=C(\C(=O)O)/Cl)(\C(Cl)Cl)/C=O	217.43	Shuxin Sui et al.2024
	168	598-78-7	2-Chloropropionic acid	C(C(=O)O)(C)Cl	108.52	Shuxin Sui et al.2024
	169	608-42-4	2-Butenedioic acid, 2,3-dichloro-, (2Z)-	C(=C(\C(=O)O)/Cl)(\C(=O)O)/Cl	184.96	Shuxin Sui et al.2024
	170	107-94-8	3-Chloropropionic acid	C(C(=O)O)CCl	108.52	Shuxin Sui et al.2024
	171	594-48-9	Propanoic acid, 2,2-dibromo-	C(C(=O)O)(Br)(Br)C	231.87	Shuxin Sui et al.2024
	172	608-38-8	(2E)-2,3-dibromo-2-butenedioic acid	C(=C(\C(=O)O)/Br)(/C(=O)O)\Br	273.86	Shuxin Sui et al.2024
	173	600-05-5	2,3-Dibromopropionic acid	C(C(=O)O)(CBr)Br	231.87	Shuxin Sui et al.2024
	174	921-08-4	2-Chloro-3-methylbutanoic acid	C(C(C)C)(C(=O)O)Cl	136.58	Shuxin Sui et al.2024
	175	599-01-9	3,3,3-trichlorolactic acid	C(C(Cl)(Cl)Cl)(C(=O)O)O	193.41	Shuxin Sui et al.2024
	176	584-99-6	bromomaleic acid	C(=C\C(=O)O)(\C(=O)O)/Br	194.97	Shuxin Sui et al.2024
	177	15519-38-7	Butanedioic acid, 2,2-dichloro-	C(CC(=O)O)(C(=O)O)(Cl)Cl	186.97	Shuxin Sui et al.2024
	178	13023-00-2	2,2-Dichlorobutanoic acid	C(C(=O)O)(CC)(Cl)Cl	156.99	Shuxin Sui et al.2024
	179	2257-35-4	2-Propenoicacid,2,3,3-trichloro-	C(=C(Cl)Cl)(C(=O)O)Cl	175.39	Shuxin Sui et al.2024
	180	2903-43-7	Pentanoic acid,5,5,5-trichloro-4-oxo-	C(=O)(C(Cl)(Cl)Cl)CCC(=O)O	219.45	Shuxin Sui et al.2024
	181	25144-43-8	2-Butenedioic acid, 2,​3-​dichloro-​, (2E)​-	C(=C(\C(=O)O)/Cl)(/C(=O)O)\Cl	184.96	Shuxin Sui et al.2024
	182	77012-53-4	3-chlorolevulinic acid	C(CC(=O)O)(C(=O)C)Cl	150.56	Shuxin Sui et al.2024
	183	126572-79-0	2-Chloro-3-(dichloromethyl)-2-butenedioic acid	C(=C(\C(=O)O)/Cl)(/C(Cl)Cl)\C(=O)O	233.43	Shuxin Sui et al.2024
	184	158551-88-3	Pentanoic acid, 3,3-dichloro-4-oxo-	C(CC(=O)O)(C(=O)C)(Cl)Cl	185	Shuxin Sui et al.2024
	185	1050447-14-7	2-Propenoic acid, 2-​bromo-​3,​3-​dichloro-	C(=C(Cl)Cl)(C(=O)O)Br	219.85	Shuxin Sui et al.2024
	186	1050447-15-8	2-Propenoic acid, 3-​bromo-​2,​3-​dichloro-​, (2E)​-	C(=C(\Br)/Cl)(\C(=O)O)/Cl	219.85	Shuxin Sui et al.2024
	187	1050447-16-9	2-Propenoic acid, 3-​bromo-​2,​3-​dichloro-​, (2Z)​-	C(=C(\Br)/Cl)(/C(=O)O)\Cl	219.85	Shuxin Sui et al.2024
	188	4198-33-8	(S)-2-Chlorobutanedioic acid	[C@H](CC(=O)O)(C(=O)O)Cl	152.53	Shuxin Sui et al.2024
	189	565-64-0	2,3-Dichloropropionic acid	C(C(=O)O)(CCl)Cl	142.97	Shuxin Sui et al.2024
	190	598-72-1	2-Bromopropionic acid	C(C(=O)O)(Br)C	152.97	Shuxin Sui et al.2024
	191	1379403-76-5	2-Propenoic acid, 3-bromo-3-chloro-	C(=C(Br)Cl)C(=O)O	185.4	Shuxin Sui et al.2024
	192	1081832-96-3	2-Propenoic acid, 2-bromo-3-chloro-, (2E)-	C(=C\Cl)(\C(=O)O)/Br	185.4	Shuxin Sui et al.2024
	193	24557-10-6	(Z)-2,3-Dibromopropenoic acid	C(=C\Br)(/C(=O)O)\Br	229.85	Shuxin Sui et al.2024
	194	1578-72-9	(E)-2,3-Dibromopropenoic acid	C(=C\Br)(\C(=O)O)/Br	229.85	Shuxin Sui et al.2024
	195	88917-05-9	2-Propenoic acid, 3,​3-​dibromo-​2-​chloro-	C(=C(Br)Br)(C(=O)O)Cl	264.3	Shuxin Sui et al.2024
	196	1403267-32-2	2-Propenoic acid, 2,​3-​dibromo-​3-​chloro-​, (2E)​-	C(=C(\Br)/Cl)(\C(=O)O)/Br	264.3	Shuxin Sui et al.2024
	197	1403267-33-3	2-Propenoic acid, 2,​3-​dibromo-​3-​chloro-​, (2Z)​-	C(=C(\Br)/Cl)(/C(=O)O)\Br	264.3	Shuxin Sui et al.2024
	198	5405-34-5	(Z)-2-Bromo-2-butenoic acid	C(=C\C)(/C(=O)O)\Br	164.99	Shuxin Sui et al.2024
	199	36297-22-0	(E)-2-Bromo-2-butenoic acid	C(=C\C)(\C(=O)O)/Br	164.99	Shuxin Sui et al.2024
	200	24557-17-3	(2E)-2,3-Dibromo-2-butenoic acid	C(=C(\Br)/C)(\C(=O)O)/Br	243.88	Shuxin Sui et al.2024
	201	57697-64-0	(Z)-2,3-dichloro-4-oxo-but-2-enoic acid	C(=C(C=O)Cl)(C(=O)O)Cl	168.96	Shuxin Sui et al.2024
	202	135679-99-1	2-Butenoic acid, 2,​4,​4-​trichloro-​3-​formyl-	C(=C(C(=O)O)Cl)(C(Cl)Cl)C=O	217.43	Shuxin Sui et al.2024
	203	700365-45-3	2-Butenoic acid, 4-​bromo-​2,​4-​dichloro-​3-​formyl-	C(=C(C(=O)O)Cl)(C(Br)Cl)C=O	261.88	Shuxin Sui et al.2024
	204	700365-47-5	2-Butenoic acid, 4,​4-​dibromo-​2-​chloro-​3-​formyl-	C(=C(C(=O)O)Cl)(C(Br)Br)C=O	306.33	Shuxin Sui et al.2024
	205	700365-46-4	2-Butenoic acid, 2,​4,​4-​tribromo-​3-​formyl-	C(=C(C(=O)O)Br)(C(Br)Br)C=O	350.79	Shuxin Sui et al.2024
	206	412034-77-6	2-Pentenoic acid, 2,​3,​5-​trichloro-​4-​oxo-	C(=C(C(=O)O)Cl)(C(=O)CCl)Cl	217.43	Shuxin Sui et al.2024
	207	19359-89-8	2,5-​Cyclohexadiene-​1,​4-​dione, 3,​5-​dichloro-​2-​hydroxy-	C(=C(C(=O)O)Cl)(C(=O)C(Cl)(Cl)Cl)Cl	286.3	Shuxin Sui et al.2024
	208	158347-29-6	2-Pentenoic acid, 3,5,5,5-tetrachloro-2-methyl-4-oxo-	C(=C(C(=O)O)C)(C(=O)C(Cl)(Cl)Cl)Cl	265.9	Shuxin Sui et al.2024
	209	101205-16-7	3-Hexenoic acid, 2,2,3,4,6,6,6-heptachloro-5-oxo-	C(=C(C(=O)C(Cl)(Cl)Cl)Cl)(C(C(=O)O)(Cl)Cl)Cl	369.2	Shuxin Sui et al.2024
	210	101205-15-6	Propanedioic acid, 2-(1,3,3,3-tetrachloro-2-oxopropylidene)-	C(=C(C(=O)C(Cl)(Cl)Cl)Cl)(C(=O)O)C(=O)O	295.9	Shuxin Sui et al.2024
	211	80-58-0	2-Bromobutyric acid	C(C(=O)O)(CC)Br	167	Shuxin Sui et al.2024
	212	13991-36-1	4-Bromocrotonic acid	C(=C\CBr)/C(=O)O	164.99	Shuxin Sui et al.2024
	213	5469-80-7	Propanoic acid,3,3-dibromo-	C(C(Br)Br)C(=O)O	231.87	Shuxin Sui et al.2024
	214	79-08-3	Bromoaceticacid	C(=O)(CBr)O	138.95	Shuxin Sui et al.2024
	215	79-11-8	Chloroaceticacid	C(=O)(CCl)O	94.5	Shuxin Sui et al.2024
	216	64-69-7	Iodoaceticacid	C(=O)(CI)O	185.95	Shuxin Sui et al.2024
	217	631-64-1	Dibromoaceticacid	C(C(=O)O)(Br)Br	217.84	Shuxin Sui et al.2024
	218	79-43-6	Dichloroaceticacid	C(C(=O)O)(Cl)Cl	128.94	Shuxin Sui et al.2024
	219	598-89-0	Diiodoaceticacid	C(C(=O)O)(I)I	311.84	Shuxin Sui et al.2024
	220	5589-96-8	Bromochloroaceticacid	C(C(=O)O)(Br)Cl	173.39	Shuxin Sui et al.2024
	221	71815-43-5	Bromoiodoaceticacid	C(C(=O)O)(Br)I	264.84	Shuxin Sui et al.2024
	222	53715-09-6	Chloroiodoaceticacid	C(C(=O)O)(Cl)I	220.39	Shuxin Sui et al.2024
	223	75-96-7	Tribromoaceticacid	C(C(=O)O)(Br)(Br)Br	296.74	Shuxin Sui et al.2024
	224	76-03-9	Trichloroaceticacid	C(C(=O)O)(Cl)(Cl)Cl	163.38	Shuxin Sui et al.2024
	225	5278-95-5	Chlorodibromoaceticacid	C(C(=O)O)(Br)(Br)Cl	252.29	Shuxin Sui et al.2024
	226	71133-14-7	Bromodichloroaceticacid	C(C(=O)O)(Br)(Cl)Cl	207.83	Shuxin Sui et al.2024
	227	39121-33-0	(Z)-3-Bromo-3-iodopropenoicacid	C(=C(\Br)/I)/C(=O)O	276.86	Shuxin Sui et al.2024
	228	59110-12-2	(E)-3-Bromo-3-iodopropenoicacid	C(=C(\Br)/I)\C(=O)O	276.86	Shuxin Sui et al.2024
	229	1578-21-8	3,3-Dibromopropenoicacid	C(=C(Br)Br)C(=O)O	229.85	Shuxin Sui et al.2024
	230	769146-63-6	(E)-2-Iodo-3-methylbutenedioicacid	C(=C(\C(=O)O)/I)(\C(=O)O)/C	255.99	Shuxin Sui et al.2024
	231	71815-46-8	2,3,3-Tribromopropenoicacid	C(=C(Br)Br)(C(=O)O)Br	308.75	Shuxin Sui et al.2024
	232	24767-86-0	2,3-Dibromopropenoicacid	C(=CBr)(C(=O)O)Br	229.85	Shuxin Sui et al.2024
	233	87-56-9	MucochloricAcid	C(=C(\C=O)/Cl)(\C(=O)O)/Cl	168.96	Shuxin Sui et al.2024
	234	16045-92-4	ChlorosuccinicAcid	C(CC(=O)O)(C(=O)O)Cl	152.53	Shuxin Sui et al.2024
	235	199744-31-5	3,3-Dibromo-4-oxopentanoicacid	C(CC(=O)O)(C(=O)C)(Br)Br	273.91	Shuxin Sui et al.2024
	236	907200-89-9	3-Bromo-3-chloro-4-oxopentanoicacid	C(CC(=O)O)(C(=O)C)(Br)Cl	229.45	Shuxin Sui et al.2024
	237	644-80-4	2-Bromobutenedioicacid	C(=C\C(=O)O)(/C(=O)O)\Br	194.97	Shuxin Sui et al.2024
	238	23366-89-4	2-Bromo-3-methyl-butenedioicacid	C(=C(\C(=O)O)/C)(/C(=O)O)\Br	208.99	Shuxin Sui et al.2024
	239	26910-68-9	2-Propenal, 2,3-dichloro-	C(=CCl)(C=O)Cl	124.95	Shuxin Sui et al.2024
	240	13206-46-7	Propanal, 2-bromo-2-methyl-	C(C=O)(Br)(C)C	151	Shuxin Sui et al.2024
	241	917-93-1	2-chloro-2-methylpropionaldehyde	C(C=O)(C)(C)Cl	106.55	Shuxin Sui et al.2024
	242	683-51-2	2-chloroacrolein	C(=C)(C=O)Cl	90.51	Shuxin Sui et al.2024
	243	762-39-0	Hexanal, 2-chloro-	C(CCCC)(C=O)Cl	134.6	Shuxin Sui et al.2024
	244	232616-51-2	Butanal, 4-chloro-​3-​oxo-	C(=O)(CC=O)CCl	120.53	Shuxin Sui et al.2024
	245	27313-32-2	2,2-Dichloropropanal	C(C=O)(C)(Cl)Cl	126.97	Shuxin Sui et al.2024
	246	7789-90-4	2,2,3-Trichloropropanal	C(CCl)(C=O)(Cl)Cl	161.41	Shuxin Sui et al.2024
	247	76-36-8	2,2,3-trichlorobutyraldehyde	C(C(C)Cl)(C=O)(Cl)Cl	175.44	Shuxin Sui et al.2024
	248	24764-97-4	2-bromo-butyraldehyde	C(CC)(C=O)Br	151	Shuxin Sui et al.2024
	249	20175-17-1	Butanal, 2-iodo-	C(CC)(C=O)I	198	Shuxin Sui et al.2024
	250	3787-28-8	2-Propenal, 2,3,3-trichloro-	C(=C(Cl)Cl)(C=O)Cl	159.39	Shuxin Sui et al.2024
	251	876498-64-5	2-Butenal, 2,3-​dichloro-	C(=C(C)Cl)(C=O)Cl	138.98	Shuxin Sui et al.2024
	252	24247-53-8	2-Butenal, 2-bromo-	C(=CC)(C=O)Br	148.99	Shuxin Sui et al.2024
	253	72473-88-2	2,4-​Pentadienal, 2-​bromo-	C(=CC=C)(C=O)Br	161	Shuxin Sui et al.2024
	254	24443-10-5	2-Butenal, 4-​chloro-	C(=CC=O)CCl	104.53	Shuxin Sui et al.2024
	255	2408402-65-1	2-Butenedial, 2-​chloro-​3-​methyl-	C(=C(C=O)Cl)(C=O)C	132.55	Shuxin Sui et al.2024
	256	17157-48-1	Bromoacetaldehyde	C(C=O)Br	122.95	Shuxin Sui et al.2024
	257	107-20-0	Chloroacetaldehyde	C(C=O)Cl	78.5	Shuxin Sui et al.2024
	258	55782-51-9	Iodoacetaldehyde	C(C=O)I	169.95	Shuxin Sui et al.2024
	259	3039-13-2	Dibromoacetaldehyde	C(C=O)(Br)Br	201.84	Shuxin Sui et al.2024
	260	79-02-7	Dichloroacetaldehyde	C(C=O)(Cl)Cl	112.94	Shuxin Sui et al.2024
	261	98136-99-3	Bromochloroacetaldehyde	C(C=O)(Br)Cl	157.39	Shuxin Sui et al.2024
	262	115-17-3	Tribromoacetaldehyde	C(C=O)(Br)(Br)Br	280.74	Shuxin Sui et al.2024
	263	75-87-6	Trichloroacetaldehyde	C(C=O)(Cl)(Cl)Cl	147.38	Shuxin Sui et al.2024
	264	64316-11-6	Dibromochloroacetaldehyde	C(C=O)(Br)(Br)Cl	236.29	Shuxin Sui et al.2024
	265	34619-29-9	Bromodichloroacetaldehyde	C(C=O)(Br)(Cl)Cl	191.84	Shuxin Sui et al.2024
	266	54314-83-9	Propane, 1-bromo-3-(chloromethoxy)-	C(CCBr)OCCl	187.46	Shuxin Sui et al.2024
	267	64362-62-5	Ethane, 2-chloro-1-ethoxy-1-methoxy-	C(OCC)(CCl)OC	138.59	Shuxin Sui et al.2024
	268	153343-41-0	1-Propene, 1,1-​dichloro-​3-​(dichloromethoxy)​-​2-​methyl-	C(=C(Cl)Cl)(COC(Cl)Cl)C	223.9	Shuxin Sui et al.2024
	269	542-88-1	Chloro(chloromethoxy) methane	O(CCl)CCl	114.96	Shuxin Sui et al.2024
	270	20524-86-1	Bis(dichloromethyl) ether	O(C(Cl)Cl)C(Cl)Cl	183.8	Shuxin Sui et al.2024
	271	594-40-1	2,2-Dichloropropanenitrile	C(C#N)(C)(Cl)Cl	123.97	Shuxin Sui et al.2024
	272	34362-21-5	3,4-Dichlorobutyronitrile	C(CC#N)(CCl)Cl	137.99	Shuxin Sui et al.2024
	273	181529-82-8	Propanenitrile, 3-bromo-​2,​3-​dichloro-	C(C(Br)Cl)(C#N)Cl	202.86	Shuxin Sui et al.2024
	274	6280-87-1	5-Chlorovaleronitrile	C(CCCl)CC#N	117.58	Shuxin Sui et al.2024
	275	1360686-37-8	Butanenitrile, 2,2-​dibromo-	C(CC)(C#N)(Br)Br	226.9	Shuxin Sui et al.2024
	276	408538-05-6	Propanenitrile, 2,2-​dibromo-	C(C#N)(Br)(Br)C	212.87	Shuxin Sui et al.2024
	277	959961-04-7	Diiodoacetonitrile	C(C#N)(I)I	292.84	Shuxin Sui et al.2024
	278	590-17-0	Bromoacetonitrile	C(C#N)Br	119.95	Shuxin Sui et al.2024
	279	107-14-2	Chloroacetonitrile	C(C#N)Cl	75.5	Shuxin Sui et al.2024
	280	624-75-9	Iodoacetonitrile	C(C#N)I	166.95	Shuxin Sui et al.2024
	281	3252-43-5	Dibromoacetonitrile	C(C#N)(Br)Br	198.84	Shuxin Sui et al.2024
	282	3018-12-0	Dichloroacetonitrile	C(C#N)(Cl)Cl	109.94	Shuxin Sui et al.2024
	283	83463-62-1	Bromochloroacetonitrile	C(C#N)(Br)Cl	154.39	Shuxin Sui et al.2024
	284	60523-73-1	Bromodichloroacetonitrile	C(C#N)(Br)(Cl)Cl	188.84	Shuxin Sui et al.2024
	285	144772-39-4	Dibromochloroacetonitrile	C(C#N)(Br)(Br)Cl	233.29	Shuxin Sui et al.2024
	286	75519-19-6	Tribromoacetonitrile	C(C#N)(Br)(Br)Br	277.74	Shuxin Sui et al.2024
	287	545-06-2	Trichloroacetonitrile	C(C#N)(Cl)(Cl)Cl	144.38	Shuxin Sui et al.2024
	288	4554-16-9	2,3-Dibromopropionitrile	C(CBr)(C#N)Br	212.87	Shuxin Sui et al.2024
	289	506-68-3	Cyanogenbromide	C(#N)Br	105.92	Shuxin Sui et al.2024
	290	506-77-4	Cyanogenchloride	C(#N)Cl	61.47	Shuxin Sui et al.2024
	291	506-78-5	Cyanogeniodide	C(#N)I	152.922	Shuxin Sui et al.2024
	292	2417-90-5	3-Bromopropionitrile	C(CBr)C#N	133.97	Shuxin Sui et al.2024
	293	594-44-5	Ethanesulfonyl chloride	S(=O)(=O)(CC)Cl	128.58	Shuxin Sui et al.2024
	294	3518-65-8	Chloromethanesulfonyl chloride	S(=O)(=O)(CCl)Cl	149	Shuxin Sui et al.2024
	295	563-84-8	3-chlorobutan-2-ol	C(C(C)O)(C)Cl	108.57	Shuxin Sui et al.2024
	296	540-51-2	2-Bromoethanol	C(CO)Br	124.96	Shuxin Sui et al.2024
	297	115-20-8	Trichloroethanol	C(CO)(Cl)(Cl)Cl	149.4	Shuxin Sui et al.2024
	298	507-42-6	2,2,2-tribromoethane-1,1-diol	C(C(O)O)(Br)(Br)Br	298.76	Shuxin Sui et al.2024
	299	232616-52-3	2-Pentanol, 4,​5-​dichloro-	C(CC(C)O)(CCl)Cl	157.04	Shuxin Sui et al.2024
	300	21326-62-5	2-Butanol, 3-chloro-2-methyl-	C(C(C)Cl)(C)(C)O	122.59	Shuxin Sui et al.2024
	301	302-17-0	ChloralHydrate	C(C(O)O)(Cl)(Cl)Cl	165.4	Shuxin Sui et al.2024
	302	13401-56-4	3-chloro-2,2-dimethyl-1-propanol	C(CCl)(CO)(C)C	122.59	Shuxin Sui et al.2024
	303	16212-28-5	2,3,3-trichloro-2-propenenitrile	C(=C(Cl)Cl)(C#N)Cl	156.39	Shuxin Sui et al.2024
	304	181529-83-9	2-Butenenitrile, 2,​3,​4-​trichloro-​, (2E)​-	C(=C(\C#N)/Cl)(/CCl)\Cl	170.42	Shuxin Sui et al.2024
	305	181529-84-0	2-Butenenitrile, 2,​3,​4-​trichloro-​, (2Z)​-	C(=C(\C#N)/Cl)(\CCl)/Cl	170.42	Shuxin Sui et al.2024
	306	103-09-3	2-Ethylhexyl acetate	C(COC(=O)C)(CCCC)CC	172.26	Shuxin Sui et al.2024
	307	2156-97-0	Dodecyl acrylate	C(COC(=O)C=C)CCCCCCCCCC	240.38	Shuxin Sui et al.2024
	308	105-76-0	Dibutyl maleate	C(=O)(/C=C\C(=O)OCCCC)OCCCC	228.28	Shuxin Sui et al.2024
	309	14234-82-3	Diisobutyl maleate	C(=O)(/C=C\C(=O)OCC(C)C)OCC(C)C	228.28	Shuxin Sui et al.2024
	310	106-79-6	Dimethyl sebacate	C(=O)(CCCCCCCCC(=O)OC)OC	230.3	Shuxin Sui et al.2024
	311	123-79-5	Dioctyl adipate	C(CCCC(=O)OCCCCCCCC)C(=O)OCCCCCCCC	370.6	Shuxin Sui et al.2024
	312	7452-79-1	Ethyl 2-methylbutyrate	C(=O)(C(CC)C)OCC	130.18	Shuxin Sui et al.2024
	313	6026-86-4	methyl 5-oxopentanoate	C(=O)(CCCC=O)OC	130.14	Shuxin Sui et al.2024
	314	2046-21-1	methyl 6-oxoheptanoate	C(CCCC(=O)C)C(=O)OC	158.19	Shuxin Sui et al.2024
	315	106-73-0	Methyl heptanoate	C(=O)(CCCCCC)OC	144.21	Shuxin Sui et al.2024
	316	1694-31-1	tert-Butyl acetoacetate	O(C(C)(C)C)C(=O)CC(=O)C	158.19	Shuxin Sui et al.2024
	317	2777-66-4	10-Undecynoic acid, methyl ester	C(CCC(=O)OC)CCCCCC#C	196.29	Shuxin Sui et al.2024
	318	1191-02-2	4-Decenoic acid methyl ester	C(CC=CCCCCC)C(=O)OC	184.27	Shuxin Sui et al.2024
	319	7011-82-7	4-Oxodecanoic acid methyl ester	C(=O)(CCC(=O)OC)CCCCCC	200.27	Shuxin Sui et al.2024
	320	2575-07-7	9-Ketocapric acid methyl ester	C(=O)(CCCCCCCC(=O)C)OC	200.27	Shuxin Sui et al.2024
	321	1931-63-1	9-Ketononanoic acid methyl ester	C(CCCCCCC=O)C(=O)OC	186.25	Shuxin Sui et al.2024
	322	2835-39-4	Allyl 3-methylbutanoate	C(C(=O)OCC=C)C(C)C	142.2	Shuxin Sui et al.2024
	323	111-11-5	Caprylic acid methyl ester	C(CC(=O)OC)CCCCC	158.24	Shuxin Sui et al.2024
	324	1732-10-1	Dimethyl azelate	C(=O)(CCCCCCCC(=O)OC)OC	216.27	Shuxin Sui et al.2024
	325	105-54-4	Ethyl butyrate	C(=O)(CCC)OCC	116.16	Shuxin Sui et al.2024
	326	539-82-2	Ethyl valerate	C(=O)(CCCC)OCC	130.18	Shuxin Sui et al.2024
	327	4567-98-0	Hendecanedioic acid dimethyl ester	C(=O)(CCCCCCCCCC(=O)OC)OC	244.33	Shuxin Sui et al.2024
	328	5434-57-1	hexyl pivalate	C(=O)(OCCCCCC)C(C)(C)C	186.29	Shuxin Sui et al.2024
	329	3884-92-2	methyl 8-oxooctanoate	C(CCC(=O)OC)CCCC=O	172.22	Shuxin Sui et al.2024
	330	624-24-8	Methyl valerianate	C(=O)(CCCC)OC	116.16	Shuxin Sui et al.2024
	331	16493-42-8	Methyl-7-oxooctanoate	C(CCC(=O)OC)CCC(=O)C	172.22	Shuxin Sui et al.2024
	332	5129-35-1	Propanoic acid, 2,2-dimethyl-, propyl ester_x000D_	C(=O)(C(C)(C)C)OCCC	144.21	Shuxin Sui et al.2024
	333	77-94-1	Tributyl citrate	C(CC(=O)OCCCC)(CC(=O)OCCCC)(C(=O)OCCCC)O	360.4	Shuxin Sui et al.2024
	334	3377-92-2	Vinyl Pivalate	C(=O)(C(C)(C)C)OC=C	128.17	Shuxin Sui et al.2024
	335	13467-82-8	tert-butyl octaneperoxoate	C(=O)(OOC(C)(C)C)CCCCCCC	216.32	Shuxin Sui et al.2024
	336	5921-82-4	1-methylhexyl acetate	C(C(OC(=O)C)C)CCCC	158.24	Shuxin Sui et al.2024
	337	81426-68-8	Butanedioic acid, 2-hydroxy-​2-​methyl-​, 1,​4-​dimethyl ester, (2R)​-	[C@@](CC(=O)OC)(C(=O)OC)(C)O	176.17	Shuxin Sui et al.2024
	338	6380-71-8	Dodecyl 3-sulfanylpropanoate	C(CCCCCCCCCCC)OC(=O)CCS	274.5	Shuxin Sui et al.2024
	339	5454-19-3	n-Decyl propanoate	C(COC(=O)CC)CCCCCCCC	214.34	Shuxin Sui et al.2024
	340	762-75-4	tert-Butyl forMate	O(C(C)(C)C)C=O	102.13	Shuxin Sui et al.2024
	341	104986-28-9	hexanoicacid,6-(acetyloxy)-,ethyl	C(CCCCOC(=O)C)C(=O)OCC	202.25	Shuxin Sui et al.2024
	342	105-37-3	Ethyl propionate	C(=O)(OCC)CC	102.13	Shuxin Sui et al.2024
	343	29972-79-0	11-Dodecenoic acid, methyl ester	C(CCC(=O)OC)CCCCCCC=C	212.33	Shuxin Sui et al.2024
	344	55682-83-2	3-Hydroxy Myristic Acid Methyl Ester	C(CCCCCCCCCCC)(CC(=O)OC)O	258.4	Shuxin Sui et al.2024
	345	111-81-9	Methyl undecylenate	C(CCC(=O)OC)CCCCCC=C	198.3	Shuxin Sui et al.2024
	346	58185-66-3	3-Pentenoic acid, 5-methoxy-, methyl ester	C(=O)(CC=CCOC)OC	144.17	Shuxin Sui et al.2024
	347	20731-22-0	7-Nonenoic acid methyl ester	C(CCC(=O)OC)CCC=CC	170.25	Shuxin Sui et al.2024
	348	20731-23-1	8-Nonenoic acid methyl ester	C(CCC(=O)OC)CCCC=C	170.25	Shuxin Sui et al.2024
	349	82302-70-3	4-Octenoic acid, 8-oxo-, methyl ester, (Z)-	C(=C\CCC=O)\CCC(=O)OC	170.21	Shuxin Sui et al.2024
	350	21063-71-8	methyl (Z)-oct-4-enoate	C(CC(=O)OC)/C=C\CCC	156.22	Shuxin Sui et al.2024
	351	7367-85-3	methyl (E)-2-decenoate	C(=C\CCCCCCC)/C(=O)OC	184.27	Shuxin Sui et al.2024
	352	56909-03-6	13-Tetradecynoic acid methyl ester	C(CCC(=O)OC)CCCCCCCCC#C	238.37	Shuxin Sui et al.2024
	353	20257-95-8	8-Hydroxyoctanoic acid methyl ester	C(CCC(=O)OC)CCCCO	174.24	Shuxin Sui et al.2024
	354	69668-85-5	(Z)-3-Octenoic acid methyl ester	C(=C\CCCC)\CC(=O)OC	156.22	Shuxin Sui et al.2024
	355	68950-90-3	17-Octadecynoic acid, methyl ester	C(CCCCCCCCCCC#C)CCCCC(=O)OC	294.5	Shuxin Sui et al.2024
	356	61597-96-4	Propanoic acid, 2-hydroxy-​, 2-​methylpropyl ester, (2R)​-	C(=O)(OCC(C)C)[C@@H](C)O	146.18	Shuxin Sui et al.2024
	357	98560-79-3	Butanoic acid, 3-methyl-​, 2-​methoxyethyl ester	O(C(=O)CC(C)C)CCOC	160.21	Shuxin Sui et al.2024
	358	1199263-93-8	Dodecanoic acid, 2-hexen-​1-​yl ester	C(=O)(CCCCCCCCCCC)OCC=CCCC	282.5	Shuxin Sui et al.2024
	359	361149-11-3	Acetic acid, 2-methoxy-​, 1-​ethylundecyl ester	C(OC(=O)COC)(CCCCCCCCCC)CC	272.42	Shuxin Sui et al.2024
	360	123-92-2	Isoamyl acetate	C(CC(C)C)OC(=O)C	130.18	Shuxin Sui et al.2024
	361	84213-57-0	N-(1-Cyano-1-methylethyl)isobutyramide	C(NC(=O)C(C)C)(C#N)(C)C	154.21	Shuxin Sui et al.2024
	362	626-97-1	Pentanamide	C(C(=O)N)CCC	101.15	Shuxin Sui et al.2024
	363	761-65-9	N,N-Dibutylformamide	N(CCCC)(CCCC)C=O	157.25	Shuxin Sui et al.2024
	364	617-84-5	N,N-Diethylformamide	N(CC)(CC)C=O	101.15	Shuxin Sui et al.2024
	365	871-71-6	N-Butylformamide	C(CCC)NC=O	101.15	Shuxin Sui et al.2024
	366	627-45-2	n-ethyl-formamid	N(CC)C=O	73.09	Shuxin Sui et al.2024
	367	10264-17-2	N-Hexylbutyramide	C(=O)(NCCCCCC)CCC	171.28	Shuxin Sui et al.2024
	368	6719-21-7	2-Amino-2-cyanoacetamide	C(C(=O)N)(C#N)N	99.09	Shuxin Sui et al.2024
	369	79-05-0	Propionamide	C(=O)(CC)N	73.09	Shuxin Sui et al.2024
	370	38291-82-6	Valeric Acid Hydrazine	C(=O)(CCCC)NN	116.16	Shuxin Sui et al.2024
	371	7206-13-5	(E)-2-Dodecene	C(CCC/C=C/C)CCCCC	168.32	Shuxin Sui et al.2024
	372	10374-74-0	(7E)-7-Tetradecene	C(=CCCCCCC)CCCCCC	196.37	Shuxin Sui et al.2024
	373	7423-69-0	1-Hexene, 3,5-dimethyl-	C(CC(C)C)(C=C)C	112.21	Shuxin Sui et al.2024
	374	4161-65-3	2,4-Dimethyl-1,4-pentadiene	C(C(=C)C)C(=C)C	96.17	Shuxin Sui et al.2024
	375	2213-32-3	2,4-Dimethyl-1-pentene	C(C(C)C)C(=C)C	98.19	Shuxin Sui et al.2024
	376	3404-55-5	2-Hexene, 4-methyl-	C(C=CC)(CC)C	98.19	Shuxin Sui et al.2024
	377	124-11-8	_x000D_ 1-Nonene	C(CCCC)CCC=C	126.24	Shuxin Sui et al.2024
	378	2437-56-1	1-Tidecene	C(CCCCCC)CCCCC=C	182.35	Shuxin Sui et al.2024
	379	762-62-9	4,4-Dimethyl-1-pentene	C(C(C)(C)C)C=C	98.19	Shuxin Sui et al.2024
	380	13151-29-6	4-Methyl-1-decene	C(CCCCCC)(CC=C)C	154.29	Shuxin Sui et al.2024
	381	7206-21-5	5-Octadecene, (5E)-	C(CCC/C=C/CCCC)CCCCCCCC	252.5	Shuxin Sui et al.2024
	382	56671-76-2	Undecane, 6-(2,2-dimethylpropylidene)-4,8-dimethyl-	C(=CC(C)(C)C)(CC(CCC)C)CC(CCC)C	252.5	Shuxin Sui et al.2024
	383	55499-02-0	(E)-2,2-Dimethyl-3-decene	C(=C\CCCCCC)/C(C)(C)C	168.32	Shuxin Sui et al.2024
	384	41446-60-0	(7Z)-7-Tetradecene	C(=C\CCCCCC)\CCCCCC	196.37	Shuxin Sui et al.2024
	385	63830-69-3	(Z)-3-Methyl-4-nonene	C(/C=C\CCCC)(CC)C	140.27	Shuxin Sui et al.2024
	386	1150663-02-7	4-Undecene, 9-​methyl-	C(CCC(CC)C)C=CCCC	168.32	Shuxin Sui et al.2024
	387	13475-81-5	2,2,3,3-tetramethylhexane	C(C(C)(C)C)(CCC)(C)C	142.28	Shuxin Sui et al.2024
	388	2801-84-5	2,4-dimethyldecane	C(C(CC(C)C)C)CCCCC	170.33	Shuxin Sui et al.2024
	389	17302-27-1	2,5-DimethylNonane	C(CCC(C)C)(CCCC)C	156.31	Shuxin Sui et al.2024
	390	17301-23-4	2,6-Dimethylundecene	C(CCCC(C)C)(CCCCC)C	184.36	Shuxin Sui et al.2024
	391	17302-01-1	3-methyl-3-ethylheptane	C(CCCC)(CC)(CC)C	142.28	Shuxin Sui et al.2024
	392	16747-38-9	pentane,2,3,3,4-tetramethyl-	C(C(C)C)(C(C)C)(C)C	128.25	Shuxin Sui et al.2024
	393	16747-28-7	Hexane, 2,3,3-trimethyl-	C(CCC)(C(C)C)(C)C	128.25	Shuxin Sui et al.2024
	394	20278-85-7	2,3,5-Trimethylheptane.	C(C(C(C)C)C)C(CC)C	142.28	Shuxin Sui et al.2024
	395	18344-37-1	Heptadecane, 2,6,​10,​14-​tetramethyl-	C(CCCC(CCCC(C)C)C)(CCCC(CCC)C)C	296.6	Shuxin Sui et al.2024
	396	17301-25-6	2,8-Dimethylundecane	C(CC(CCC)C)CCCC(C)C	184.36	Shuxin Sui et al.2024
	397	871-83-0	2-Methylnonane	C(CCCCC)CC(C)C	142.28	Shuxin Sui et al.2024
	398	4110-44-5	3,3-Dimethyloctane	C(CCCCC)(CC)(C)C	142.28	Shuxin Sui et al.2024
	399	922-28-1	3,4-Dimethylheptane	C(C(CC)C)(CCC)C	128.25	Shuxin Sui et al.2024
	400	1068-87-7	3-Ethyl-2,4-dimethylpentane	C(C(C)C)(C(C)C)CC	128.25	Shuxin Sui et al.2024
	401	2216-33-3	3-Methyloctane	C(CCCCC)(CC)C	128.25	Shuxin Sui et al.2024
	402	6117-97-1	4-Methyldodecane	C(CCCCCCCC)(CCC)C	184.36	Shuxin Sui et al.2024
	403	17312-75-3	5-Methyl-5-propylnonane	C(CCCC)(CCCC)(CCC)C	184.36	Shuxin Sui et al.2024
	404	17302-33-9	6-methylundecane	C(C(CCCCC)C)CCCC	170.33	Shuxin Sui et al.2024
	405	13150-81-7	decane,2,6-dimethyl-_x000D_	C(CCCC(C)C)(CCCC)C	170.33	Shuxin Sui et al.2024
	406	142-82-5	Heptane	C(CCC)CCC	100.2	Shuxin Sui et al.2024
	407	1120-21-4	n-Hendecane	C(CCCCC)CCCCC	156.31	Shuxin Sui et al.2024
	408	629-92-5	n-Nonadecane	C(CCCCCCCCC)CCCCCCCCC	268.5	Shuxin Sui et al.2024
	409	1560-86-7	nonadecane,2-methyl-	C(CCCCCCCCCCC)CCCCCC(C)C	282.5	Shuxin Sui et al.2024
	410	1070-87-7	Pentane, 2,2,4,4-tetramethyl-	C(C(C)(C)C)C(C)(C)C	128.25	Shuxin Sui et al.2024
	411	1067-20-5	Tetraethylmethane	C(CC)(CC)(CC)CC	128.25	Shuxin Sui et al.2024
	412	17312-64-0	2,2-dimethylundecane	C(CCCCCCCC)C(C)(C)C	184.36	Shuxin Sui et al.2024
	413	2216-30-0	2,5-Dimethylheptane	C(CCC(C)C)(CC)C	128.25	Shuxin Sui et al.2024
	414	62108-31-0	4-Ethyl-2,2,6,6-tetramethylheptane	C(C(CC(C)(C)C)CC)C(C)(C)C	184.36	Shuxin Sui et al.2024
	415	62108-21-8	6-ethyl-2-methyl-decane	C(CCCC(C)C)(CCCC)CC	184.36	Shuxin Sui et al.2024
	416	13287-21-3	6-Methyltridecane	C(CCCCCCC)(CCCCC)C	198.39	Shuxin Sui et al.2024
	417	17312-57-1	Dodecane, 3-methyl-	C(CCCCCCCC)C(CC)C	184.36	Shuxin Sui et al.2024
	418	54105-67-8	Heptadecane, 2,6-dimethyl-	C(CCCCCCCCCCC)(CCCC(C)C)C	268.5	Shuxin Sui et al.2024
	419	504-44-9	Hexadecane,2,6,11,15-tetrymethyl-	C(C(CCCCC(CCCC(C)C)C)C)CCC(C)C	282.5	Shuxin Sui et al.2024
	420	1069-53-0	Hexane,2,3,5-Trimethyl-	C(CC(C)C)(C(C)C)C	128.25	Shuxin Sui et al.2024
	421	52670-34-5	Octane, 2,3,6,7-tetramethyl-	C(C(C)C)(CCC(C(C)C)C)C	170.33	Shuxin Sui et al.2024
	422	61868-26-6	Heptane, 5-ethyl-2,4-dimethyl-	C(C(CC(C)C)C)(CC)CC	156.31	Shuxin Sui et al.2024
	423	25117-26-4	Hexadecane, 4-methyl-	C(CCCCCCCCCC)CC(CCC)C	240.5	Shuxin Sui et al.2024
	424	62199-06-8	Heptane, 5-ethyl-2,2,3-trimethyl-	C(CC(C(C)(C)C)C)(CC)CC	170.33	Shuxin Sui et al.2024
	425	62108-27-4	Decane, 2,4,6-trimethyl-	C(CC(CCCC)C)(CC(C)C)C	184.36	Shuxin Sui et al.2024
	426	56862-62-5	Nonadecane, 10-methyl-	C(C(CCCCCCCCC)C)CCCCCCCC	282.5	Shuxin Sui et al.2024
	427	54833-48-6	Heptadecane,2,6,10,15-tetr	C(CCC(CCCCC(CC)C)C)C(CCCC(C)C)C	296.6	Shuxin Sui et al.2024
	428	55124-79-3	9-Hexylheptadecane	C(CCCCCCCC)(CCCCCCCC)CCCCCC	324.6	Shuxin Sui et al.2024
	429	112-40-3	Dodecane	C(CCCCCC)CCCCC	170.33	Shuxin Sui et al.2024
	430	78-93-3	2-Butanone	C(=O)(CC)C	72.11	Shuxin Sui et al.2024
	431	431-03-8	2,3-Butanedione	C(=O)(C(=O)C)C	86.09	Shuxin Sui et al.2024
	432	67-64-1	Acetone	C(=O)(C)C	58.08	Shuxin Sui et al.2024
	433	21856-89-3	6-hydroxyhexan-2-one	C(CCCO)C(=O)C	116.16	Shuxin Sui et al.2024
	434	591-78-6	2-Hexanone	C(C(=O)C)CCC	100.16	Shuxin Sui et al.2024
	435	107-87-9	2-Pentanone	C(C(=O)C)CC	86.13	Shuxin Sui et al.2024
	436	513-86-0	Acetoin	C(C(=O)C)(C)O	88.11	Shuxin Sui et al.2024
	437	96-26-4	1,3-Dihydroxyacetone	C(=O)(CO)CO	90.08	Shuxin Sui et al.2024
	438	1071-73-4	3-Acetyl-1-propanol	C(C(=O)C)CCO	102.13	Shuxin Sui et al.2024
	439	589-38-8	3-Hexanone	C(=O)(CCC)CC	100.16	Shuxin Sui et al.2024
	440	110-93-0	6-Methyl-5-hepten-2-one	C(C=C(C)C)CC(=O)C	126.2	Shuxin Sui et al.2024
	441	123-42-2	Diacetone Alcohol	C(C(C)(C)O)C(=O)C	116.16	Shuxin Sui et al.2024
	442	116-09-6	Hydroxyacetone	C(=O)(CO)C	74.08	Shuxin Sui et al.2024
	443	115-22-0	1-Hydroxy-1-methylethyl methyl ketone	C(C(=O)C)(C)(C)O	102.13	Shuxin Sui et al.2024
	444	3393-64-4	1-Hydroxy-2-methyl-3-butanone	C(C(=O)C)(CO)C	102.13	Shuxin Sui et al.2024
	445	821-55-6	2-Nonanone	C(CCCCC)CC(=O)C	142.24	Shuxin Sui et al.2024
	446	111-13-7	2-Octanone	C(CC(=O)C)CCCC	128.21	Shuxin Sui et al.2024
	447	5709-95-5	2,2,8,8-Tetramethylnonane-5-one	C(=O)(CCC(C)(C)C)CCC(C)(C)C	198.34	Shuxin Sui et al.2024
	448	2922-51-2	2-Heptadecanone	C(CCCCCCCCCC)CCCCC(=O)C	254.5	Shuxin Sui et al.2024
	449	110-43-0	2-Heptanone	C(CCCC)C(=O)C	114.19	Shuxin Sui et al.2024
	450	106-35-4	3-Heptanone	C(=O)(CCCC)CC	114.19	Shuxin Sui et al.2024
	451	689-67-8	6,10-Dimethyl-5,9-undecadien-2-one	C(=CCCC(=O)C)(CCC=C(C)C)C	194.31	Shuxin Sui et al.2024
	452	13833-96-0	(5E,9E)-6,10-Dimethyl-5,9-dodecadien-2-one	C(=C\CCC(=O)C)(/CC/C=C(/CC)\C)\C	208.34	Shuxin Sui et al.2024
	453	96-04-8	2,3-Heptanedione	C(=O)(C(=O)C)CCCC	128.17	Shuxin Sui et al.2024
	454	504-20-1	2,5-Heptadien-4-one,2,6-dimethyl-	C(=C(C)C)C(=O)C=C(C)C	138.21	Shuxin Sui et al.2024
	455	693-54-9	2-Decanone	C(CCCCC)CCC(=O)C	156.26	Shuxin Sui et al.2024
	456	928-68-7	2-Heptanone,6-methyl-	C(CC(C)C)CC(=O)C	128.21	Shuxin Sui et al.2024
	457	565-61-7	2-Pentanone,3-methyl-	C(C(=O)C)(CC)C	100.16	Shuxin Sui et al.2024
	458	1119-44-4	3-Hepten-2-one	C(=CCCC)C(=O)C	112.17	Shuxin Sui et al.2024
	459	563-80-4	3-Methyl-2-butanone	C(C(=O)C)(C)C	86.13	Shuxin Sui et al.2024
	460	19549-80-5	4,6-dimethyl-2-heptanon	C(C(CC(=O)C)C)C(C)C	142.24	Shuxin Sui et al.2024
	461	123-19-3	4-Heptanone	C(=O)(CCC)CCC	114.19	Shuxin Sui et al.2024
	462	590-90-9	4-Hydroxy-2-butanone	C(C(=O)C)CO	88.11	Shuxin Sui et al.2024
	463	108-10-1	4-Methyl-2-pentanone	C(C(C)C)C(=O)C	100.16	Shuxin Sui et al.2024
	464	818-23-5	8-Oxopentadecane	C(=O)(CCCCCCC)CCCCCCC	226.4	Shuxin Sui et al.2024
	465	110-13-4	Acetonylacetone	C(CC(=O)C)C(=O)C	114.14	Shuxin Sui et al.2024
	466	3796-70-1	Geranylacetone	C(=C\CCC(=O)C)(/CCC=C(C)C)\C	194.31	Shuxin Sui et al.2024
	467	1703-51-1	Heptan-2,5-dione	C(=O)(CCC(=O)C)CC	128.17	Shuxin Sui et al.2024
	468	141-79-7	Mesity oxide	C(=C(C)C)C(=O)C	98.14	Shuxin Sui et al.2024
	469	7373-13-9	octadecan-2-one	C(CCCCCCCCCCC)CCCCC(=O)C	268.5	Shuxin Sui et al.2024
	470	18787-66-1	Pentadecan-3-one	C(CCC(=O)CC)CCCCCCCCC	226.4	Shuxin Sui et al.2024
	471	4220-52-4	3-methylhexane-2,4-dione	C(C(=O)CC)(C(=O)C)C	128.17	Shuxin Sui et al.2024
	472	26118-38-7	3,3-dimethyl-2-hexanone	C(CCC)(C(=O)C)(C)C	128.21	Shuxin Sui et al.2024
	473	40238-74-2	4-Tridecanone, 5-​ethyl-	C(CCCCCCCC)(C(=O)CCC)CC	226.4	Shuxin Sui et al.2024
	474	4161-60-8	4-hydroxypentan-2-one	C(C(C)O)C(=O)C	102.13	Shuxin Sui et al.2024
	475	18394-00-8	9-Octadecanone	C(C(=O)CCCCCCCC)CCCCCCCC	268.5	Shuxin Sui et al.2024
	476	4436-75-3	1,2-Diacetylethene	C(=CC(=O)C)C(=O)C	112.13	Shuxin Sui et al.2024
	477	64-19-7	Acetic acid	C(=O)(C)O	60.05	Shuxin Sui et al.2024
	478	112-05-0	Nonanoic acid	C(CCCCC)CCC(=O)O	158.24	Shuxin Sui et al.2024
	479	124-07-2	Octanoic acid	C(CCCCC)CC(=O)O	144.21	Shuxin Sui et al.2024
	480	334-48-5	Decanoic acid	C(CCCCCC)CCC(=O)O	172.26	Shuxin Sui et al.2024
	481	298-12-4	Glyoxylic acid	C(=O)(C=O)O	74.04	Shuxin Sui et al.2024
	482	112-37-8	Hendecanoic acid	C(CCCCCC)CCCC(=O)O	186.29	Shuxin Sui et al.2024
	483	473-90-5	Ketomalonic acid	C(=O)(C(=O)O)C(=O)O	118.04	Shuxin Sui et al.2024
	484	144-62-7	Oxalic acid	C(=O)(C(=O)O)O	90.03	Shuxin Sui et al.2024
	485	41654-09-5	2-Butenedioic acid, 2-ethyl-3-methyl-, (2Z)-	C(=C(\C(=O)O)/C)(\C(=O)O)/CC	158.15	Shuxin Sui et al.2024
	486	123-99-9	Azelaic acid	C(CC(=O)O)CCCCCC(=O)O	188.22	Shuxin Sui et al.2024
	487	79-14-1	Glycolic acid	C(=O)(CO)O	76.05	Shuxin Sui et al.2024
	488	24323-23-7	Decanoicacid,2-methyl-	C(C(C(=O)O)C)CCCCCCC	186.29	Shuxin Sui et al.2024
	489	143-07-7	Lauricacid	C(CCCCCCCC)CCC(=O)O	200.32	Shuxin Sui et al.2024
	490	110-16-7	maleicacid((E)-3-carboxyacrylate)	C(=C\C(=O)O)\C(=O)O	116.07	Shuxin Sui et al.2024
	491	64-18-6	Formic acid	C(=O)O	46.025	Shuxin Sui et al.2024
	492	110-17-8	Fumaric acid	C(=C\C(=O)O)/C(=O)O	116.07	Shuxin Sui et al.2024
	493	328-42-7	Oxobutanedioic acid	C(=O)(CC(=O)O)C(=O)O	132.07	Shuxin Sui et al.2024
	494	1002-84-2	PentadecanoicAcid	C(CCCCCCCC)CCCCCC(=O)O	242.4	Shuxin Sui et al.2024
	495	127-17-3	Pyruvic acid	C(=O)(C(=O)O)C	88.06	Shuxin Sui et al.2024
	496	638-53-9	TridecanoicAcid	C(CCCCCCCCC)CCC(=O)O	214.34	Shuxin Sui et al.2024
	497	505-52-2	1,11-Undecanedicarboxylic acid	C(CC(=O)O)CCCCCCCCCC(=O)O	244.33	Shuxin Sui et al.2024
	498	3128-06-1	5-Oxohexanoate	C(CC(=O)C)CC(=O)O	130.14	Shuxin Sui et al.2024
	499	110-94-1	Glutaric acid	C(CC(=O)O)CC(=O)O	132.11	Shuxin Sui et al.2024
	500	79-31-2	Isobutyric acid	C(C(=O)O)(C)C	88.11	Shuxin Sui et al.2024
	501	141-82-2	Malonic acid	C(C(=O)O)C(=O)O	104.06	Shuxin Sui et al.2024
	502	506-12-7	n-Heptadecoic acid	C(CCCCCCCCCCC)CCCCC(=O)O	270.5	Shuxin Sui et al.2024
	503	111-16-0	Pimelic acid	C(CC(=O)O)CCCC(=O)O	160.17	Shuxin Sui et al.2024
	504	505-48-6	Suberic acid	C(CC(=O)O)CCCCC(=O)O	174.19	Shuxin Sui et al.2024
	505	595-37-9	2,2-Dimethylbutyric acid	C(C(=O)O)(CC)(C)C	116.16	Shuxin Sui et al.2024
	506	597-43-3	2,2-Dimethylsuccinic acid	C(CC(=O)O)(C(=O)O)(C)C	146.14	Shuxin Sui et al.2024
	507	116-53-0	2-Methyl butyric acid	C(C(=O)O)(CC)C	102.13	Shuxin Sui et al.2024
	508	1821-02-9	2-Oxovaleric acid	C(=O)(CCC)C(=O)O	116.11	Shuxin Sui et al.2024
	509	109-52-4	Valeric acid	C(C(=O)O)CCC	102.13	Shuxin Sui et al.2024
	510	616-62-6	1,1-Butanedicarboxylic acid	C(CCC)(C(=O)O)C(=O)O	146.14	Shuxin Sui et al.2024
	511	693-55-0	10-ethoxy-10-keto-capric acid	C(CCCCCC(=O)O)CCC(=O)OCC	230.3	Shuxin Sui et al.2024
	512	681-57-2	2,2-Dimethylglutaric acid	C(CCC(=O)O)(C(=O)O)(C)C	160.17	Shuxin Sui et al.2024
	513	149-57-5	2-Ethylhexanoic acid	C(CCCC)(C(=O)O)CC	144.21	Shuxin Sui et al.2024
	514	97-61-0	2-Methylvaleric acid	C(CCC)(C(=O)O)C	116.16	Shuxin Sui et al.2024
	515	14292-26-3	3-Hydroxydecanoic acid	C(C(CC(=O)O)O)CCCCCC	188.26	Shuxin Sui et al.2024
	516	759-05-7	3-methyl-2-ketobutanoic acid	C(=O)(C(C)C)C(=O)O	116.11	Shuxin Sui et al.2024
	517	504-85-8	4-Methyl-3-penten-1-oic acid	C(=C(C)C)CC(=O)O	114.14	Shuxin Sui et al.2024
	518	541-50-4	Acetoacetic Acid	C(C(=O)C)C(=O)O	102.09	Shuxin Sui et al.2024
	519	124-04-9	Adipic acid	C(CCC(=O)O)CC(=O)O	146.14	Shuxin Sui et al.2024
	520	2104-19-0	Azelaic acid monomethyl ester	C(=O)(CCCCCCCC(=O)O)OC	202.25	Shuxin Sui et al.2024
	521	107-92-6	Butyric Acid	C(C(=O)O)CC	88.11	Shuxin Sui et al.2024
	522	111-14-8	Heptanoic acid	C(CC(=O)O)CCCC	130.18	Shuxin Sui et al.2024
	523	142-62-1	Hexanoic acid	C(CCCC)C(=O)O	116.16	Shuxin Sui et al.2024
	524	503-74-2	Isovaleric acid	C(C(C)C)C(=O)O	102.13	Shuxin Sui et al.2024
	525	123-76-2	Levulinic acid	C(CC(=O)O)C(=O)C	116.11	Shuxin Sui et al.2024
	526	544-63-8	Myristic acid	C(CCCCCCCC)CCCCC(=O)O	228.37	Shuxin Sui et al.2024
	527	3946-32-5	Octanedioic acid 1-methyl ester	C(=O)(CCCCCCC(=O)O)OC	188.22	Shuxin Sui et al.2024
	528	57-10-3	Palmitic acid	C(CCCCCCCCCC)CCCCC(=O)O	256.42	Shuxin Sui et al.2024
	529	111-20-6	Sebacic acid	C(CC(=O)O)CCCCCCC(=O)O	202.25	Shuxin Sui et al.2024
	530	57-11-4	Stearic acid	C(CCCCCCCCCCC)CCCCCC(=O)O	284.5	Shuxin Sui et al.2024
	531	110-15-6	Succinic acid	C(CC(=O)O)C(=O)O	118.09	Shuxin Sui et al.2024
	532	557-59-5	Tetracosanoic Acid	C(CCCCCCCCCCCCCCCC)CCCCCCC(=O)O	368.6	Shuxin Sui et al.2024
	533	1852-04-6	Undecanedioic acid	C(CC(=O)O)CCCCCCCC(=O)O	216.27	Shuxin Sui et al.2024
	534	2363-71-5	Heneicosylic Acid	C(CCCCCCCCCCCCC)CCCCCCC(=O)O	326.6	Shuxin Sui et al.2024
	535	10030-73-6	9-Hexadecenoic acid, (9E)-	C(CC/C=C/CCCCCC)CCCCC(=O)O	254.41	Shuxin Sui et al.2024
	536	149-63-3	2-oxobutanedioic acid	C(=O)(CC(=O)[O-])C(=O)[O-]	130.06	Shuxin Sui et al.2024
	537	583-93-7	2,6-Diaminopimelic acid	C(C(=O)O)(CCCC(C(=O)O)N)N	190.2	Shuxin Sui et al.2024
	538	144-90-1	2-Methyl-3-aminopropanoic acid	C(C(=O)O)(CN)C	103.12	Shuxin Sui et al.2024
	539	328-51-8	2-Oxooctanoic acid	C(=O)(CCCCCC)C(=O)O	158.19	Shuxin Sui et al.2024
	540	18069-17-5	Pentanedioic acid, 2-methyl-	C(CCC(=O)O)(C(=O)O)C	146.14	Shuxin Sui et al.2024
	541	4374-46-3	Butanoic acid, 2,3-dioxo- (9CI)	C(=O)(C(=O)C)C(=O)O	116.07	Shuxin Sui et al.2024
	542	74581-94-5	Hexanoic acid, 2-ethyl-3-methyl-	C(C(CCC)C)(C(=O)O)CC	158.24	Shuxin Sui et al.2024
	543	112-31-2	Decyl aldehyde	C(CCCCC)CCCC=O	156.26	Shuxin Sui et al.2024
	544	124-13-0	Octanal	C(CCCC)CCC=O	128.21	Shuxin Sui et al.2024
	545	107-22-2	Glyoxal	C(=O)C=O	58.04	Shuxin Sui et al.2024
	546	78-98-8	Methylglyoxal	C(=O)(C=O)C	72.06	Shuxin Sui et al.2024
	547	590-86-3	Isovaleraldehyde	C(C(C)C)C=O	86.13	Shuxin Sui et al.2024
	548	78-84-2	Isobutyraldehyde	C(C=O)(C)C	72.11	Shuxin Sui et al.2024
	549	6728-26-3	trans-2-Hexenal	C(=C\C=O)/CCC	98.14	Shuxin Sui et al.2024
	550	123-72-8	Butyraldehyde	C(CC)C=O	72.11	Shuxin Sui et al.2024
	551	112-54-9	Dodecyl aldehyde	C(CCCCCC)CCCCC=O	184.32	Shuxin Sui et al.2024
	552	123-38-6	Propionaldehyde	C(C=O)C	58.08	Shuxin Sui et al.2024
	553	112-44-7	Undecanal	C(CCCCC=O)CCCCC	170.29	Shuxin Sui et al.2024
	554	110-62-3	Valeraldehyde	C(CC=O)CC	86.13	Shuxin Sui et al.2024
	555	597-31-9	3-Hydroxy-2,2-dimethylpropanal	C(CO)(C=O)(C)C	102.13	Shuxin Sui et al.2024
	556	107-89-1	3-hydroxy-butana	C(C(C)O)C=O	88.11	Shuxin Sui et al.2024
	557	25714-71-0	4-hydroxybutyraldehyde	C(CC=O)CO	88.11	Shuxin Sui et al.2024
	558	37428-67-4	Butanal, 2-hydroxy-	C(CC)(C=O)O	88.11	Shuxin Sui et al.2024
	559	4170-30-3	Crotonaldehyde	C(=CC)C=O	70.09	Shuxin Sui et al.2024
	560	66-25-1	Hexanal	C(CCC)CC=O	100.16	Shuxin Sui et al.2024
	561	638-37-9	Succindialdehyde	C(CC=O)C=O	86.09	Shuxin Sui et al.2024
	562	18829-56-6	Trans-2-Nonenal	C(C/C=C/C=O)CCCC	140.22	Shuxin Sui et al.2024
	563	10486-19-8	Tridecanal	C(CCCCCC=O)CCCCCC	198.34	Shuxin Sui et al.2024
	564	75-07-0	Acetaldehyde	C(=O)C	44.05	Shuxin Sui et al.2024
	565	50-00-0	Formaldehyde	C=O	30.026	Shuxin Sui et al.2024
	566	2548-87-0	(E)-2-Octenal	C(CCCC)/C=C/C=O	126.2	Shuxin Sui et al.2024
	567	15877-57-3	Pentanal,3-methyl-	C(CC=O)(CC)C	100.16	Shuxin Sui et al.2024
	568	78-85-3	Methacrolein	C(=C)(C=O)C	70.09	Shuxin Sui et al.2024
	569	1115-11-3	Tiglic aldehyde	C(=CC)(C=O)C	84.12	Shuxin Sui et al.2024
	570	124-25-4	1-tetradecylaldehyde	C(CCCCCCC)CCCCCC=O	212.37	Shuxin Sui et al.2024
	571	96-17-3	2-Methylbutyraldehyde	C(CC)(C=O)C	86.13	Shuxin Sui et al.2024
	572	141-46-8	Glycoaldehyde	C(C=O)O	60.05	Shuxin Sui et al.2024
	573	111-71-7	Heptaldehyde	C(CCC=O)CCC	114.19	Shuxin Sui et al.2024
	574	505-57-7	hex-2-enal	C(=CC=O)CCC	98.14	Shuxin Sui et al.2024
	575	123-15-9	Methyl valeraldehyde	C(CCC)(C=O)C	100.16	Shuxin Sui et al.2024
	576	4417-81-6	2-oxobutanal	C(=O)(CC)C=O	86.09	Shuxin Sui et al.2024
	577	19009-56-4	2-methyl-decana	C(CCC(C=O)C)CCCCC	170.29	Shuxin Sui et al.2024
	578	629-80-1	hexadecanal	C(CCCCCCCC)CCCCCCC=O	240.42	Shuxin Sui et al.2024
	579	58594-45-9	(Z)-13-octadecenal	C(CCC/C=C\CCCC)CCCCCCCC=O	266.5	Shuxin Sui et al.2024
	580	26254-89-7	Butanal, 2,2-diethyl-	C(CC)(CC)(CC)C=O	128.21	Shuxin Sui et al.2024
	581	74327-29-0	4-oxononan-1-al	C(C(=O)CCC=O)CCCC	156.22	Shuxin Sui et al.2024
	582	32749-94-3	2,3-Dimethylpentaldehyde	C(C(C=O)C)(CC)C	114.19	Shuxin Sui et al.2024
	583	3675-13-6	2-​Butenedial, (2Z)​-	C(=C\C=O)\C=O	84.07	Shuxin Sui et al.2024
	584	1094239-48-1	2-Butenedial, 2,​3-​dimethyl-	C(=C(C=O)C)(C=O)C	112.13	Shuxin Sui et al.2024
	585	21973-20-6	2-Butenedial,2-methyl-, (2Z)-	C(=C\C=O)(\C=O)/C	98.1	Shuxin Sui et al.2024
	586	124-19-6	nonanal	C(CCCC=O)CCCC	142.24	Shuxin Sui et al.2024
	587	123-05-7	2-ethyl-1-hexanal	C(CCCC)(CC)C=O	128.21	Shuxin Sui et al.2024
	588	1634-04-4	tert-Butyl methyl ether	C(OC)(C)(C)C	88.15	Shuxin Sui et al.2024
	589	112-36-7	2-Ethoxyethyl ether	O(CCOCC)CCOCC	162.23	Shuxin Sui et al.2024
	590	534-15-6	1,1-Dimethoxyethane	C(OC)(OC)C	90.12	Shuxin Sui et al.2024
	591	111-96-6	Diethylene Glycol Dimethyl Ether	O(CCOC)CCOC	134.17	Shuxin Sui et al.2024
	592	74630-91-4	3-Methoxy-3-methylhexane	C(CCC)(CC)(OC)C	130.23	Shuxin Sui et al.2024
	593	55702-60-8	1-Ethoxy-4,4-dimethyl-2-pentene	C(=CC(C)(C)C)COCC	142.24	Shuxin Sui et al.2024
	594	134777-62-1	1-Pentene, 3-​methoxy-​3-​methyl-	C(CC)(C=C)(OC)C	114.19	Shuxin Sui et al.2024
	595	23186-70-1	Pentane, 1-(2-propen-1-yloxy)-_x000D_	C(CCCC)OCC=C	128.21	Shuxin Sui et al.2024
	596	4471-47-0	Acetonitrile, oxo- (9CI)	C(#N)C=O	55.04	Shuxin Sui et al.2024
	597	625-28-5	3-Methylbutanenitrile	C(C(C)C)C#N	83.13	Shuxin Sui et al.2024
	598	78-82-0	Isobutyronitrile	C(C#N)(C)C	69.11	Shuxin Sui et al.2024
	599	629-08-3	1-Heptanonitrile	C(CCC#N)CCC	111.18	Shuxin Sui et al.2024
	600	629-79-8	hexadecanenitrile	C(CCCCCCCC)CCCCCCC#N	237.42	Shuxin Sui et al.2024
	601	107-12-0	Propionitrile	C(C#N)C	55.08	Shuxin Sui et al.2024
	602	628-73-9	Hexanenitrile	C(CCC)CC#N	97.16	Shuxin Sui et al.2024
	603	78-97-7	Lactonitrile	C(C#N)(C)O	71.08	Shuxin Sui et al.2024
	604	124-12-9	Octanenitrile	C(CCCC)CCC#N	125.21	Shuxin Sui et al.2024
	605	544-13-8	Glutaronitrile	C(CC#N)CC#N	94.11	Shuxin Sui et al.2024
	606	78-67-1	2,2-dimethyl-2,2-azodipropiononitrile	C(/N=N/C(C#N)(C)C)(C#N)(C)C	164.21	Shuxin Sui et al.2024
	607	2243-27-8	n-Nonanenitrile	C(CCCC#N)CCCC	139.24	Shuxin Sui et al.2024
	608	110-61-2	Succinonitrile	C(CC#N)C#N	80.09	Shuxin Sui et al.2024
	609	2244-07-7	Undecanoic acid nitrile	C(CCCCC#N)CCCCC	167.29	Shuxin Sui et al.2024
	610	109-77-3	Malononitrile	C(C#N)C#N	66.06	Shuxin Sui et al.2024
	611	62-50-0	Ethyl methanesulfonate	O(S(=O)(=O)C)CC	124.16	Shuxin Sui et al.2024
	612	104-76-7	2-Ethylhexanol	C(CCCC)(CC)CO	130.23	Shuxin Sui et al.2024
	613	4328-94-3	1,3,5-Pentanetriol	C(CCO)(CCO)O	120.15	Shuxin Sui et al.2024
	614	126-30-7	2,2-Dimethyl-1,3-propanediol	C(CO)(CO)(C)C	104.15	Shuxin Sui et al.2024
	615	2935-44-6	2,5-Hexanediol	C(CC(C)O)C(C)O	118.17	Shuxin Sui et al.2024
	616	111-76-2	2-Butoxyethanol	C(OCCO)CCC	118.17	Shuxin Sui et al.2024
	617	111-42-2	Diethanolamine	N(CCO)CCO	105.14	Shuxin Sui et al.2024
	618	18409-18-2	trans-2-Decenol	C(CCCCC)C/C=C/CO	156.26	Shuxin Sui et al.2024
	619	71-36-3	1-Butanol	C(CC)CO	74.12	Shuxin Sui et al.2024
	620	3391-86-4	1-Octen-3-ol	C(CCCCC)(C=C)O	128.21	Shuxin Sui et al.2024
	621	126-86-3	2,4,7,9-Tetramethyl-5-decyne-4,7-diol	C(C#CC(CC(C)C)(C)O)(CC(C)C)(C)O	226.35	Shuxin Sui et al.2024
	622	19549-73-6	2,6-dimethyl-heptan-3-ol	C(CCC(C)C)(C(C)C)O	144.25	Shuxin Sui et al.2024
	623	106-67-2	2-ethyl-4-methylpentan-1-ol	C(CC(C)C)(CC)CO	130.23	Shuxin Sui et al.2024
	624	1610-29-3	2-methylpent-2-en-1-ol	C(=CCC)(CO)C	100.16	Shuxin Sui et al.2024
	625	5333-42-6	2-Octyl-1-dodecanol	C(CCCCCCCCCC)(CCCCCCCC)CO	298.5	Shuxin Sui et al.2024
	626	1559-34-8	3,6,9,12-tetraoxahexadecan-1-ol	C(COCCOCCO)OCCOCCCC	250.33	Shuxin Sui et al.2024
	627	565-60-6	3-Methyl-2-pentanol	C(C(C)O)(CC)C	102.17	Shuxin Sui et al.2024
	628	1569-59-1	4-Penten-2-ol, 3-methyl-	C(C(C)O)(C=C)C	100.16	Shuxin Sui et al.2024
	629	112-34-5	Butyldiglycol	C(COCCO)OCCCC	162.23	Shuxin Sui et al.2024
	630	143-22-6	Triethylene glycol monobutyl ethe	C(OCCOCCO)COCCCC	206.28	Shuxin Sui et al.2024
	631	77-99-6	Trimethylolpropane	C(CC)(CO)(CO)CO	134.17	Shuxin Sui et al.2024
	632	20324-33-8	Triisopropylene glycol monomethyl ether	C(COC(COC)C)(OCC(C)O)C	206.28	Shuxin Sui et al.2024
	633	19780-33-7	1-Dodecanol, 2-ethyl-	C(CCCCCCCCCC)(CC)CO	214.39	Shuxin Sui et al.2024
	634	3521-91-3	1-Hepten-4-ol	C(CCC)(CC=C)O	114.19	Shuxin Sui et al.2024
	635	36653-82-4	1-Hexadecanol	C(CCCCCCCC)CCCCCCCO	242.44	Shuxin Sui et al.2024
	636	112-42-5	1-Undecanol	C(CCCCCO)CCCCC	172.31	Shuxin Sui et al.2024
	637	3730-60-7	2-Hexanol, 2,5-dimethyl-	C(C(C)(C)O)CC(C)C	130.23	Shuxin Sui et al.2024
	638	1569-45-5	3,4-Dimethyl-5-hexen-3-ol	C(C(C=C)C)(CC)(C)O	128.21	Shuxin Sui et al.2024
	639	6750-34-1	3,7,11-trimethyldodecyl alcohol	C(CCCC(CCO)C)(CCCC(C)C)C	228.41	Shuxin Sui et al.2024
	640	75-85-4	2-Methyl-2-butanol	C(CC)(C)(C)O	88.15	Shuxin Sui et al.2024
	641	57803-73-3	1-Heptanol,5-methyl-,(S)-	[C@@H](CCCCO)(CC)C	130.23	Shuxin Sui et al.2024
	642	54630-50-1	5-methyl-2-heptanol	C(CCC(C)O)(CC)C	130.23	Shuxin Sui et al.2024
	643	76649-14-4	3-Octen-2-ol	C(=CC(C)O)CCCC	128.21	Shuxin Sui et al.2024
	644	23708-56-7	6-Undecanol	C(C(CCCCC)O)CCCC	172.31	Shuxin Sui et al.2024
	645	50639-00-4	2-ethylhex-2-enol	C(=CCCC)(CC)CO	128.21	Shuxin Sui et al.2024
	646	612-64-6	N-ethyl-N-phenylnitrous amide	N(CC)(N=O)c1ccccc1	150.18	Shuxin Sui et al.2024
	647	86-30-6	N-nitrosodiphenylamine	N(N=O)(c1ccccc1)c1ccccc1	198.22	Shuxin Sui et al.2024
	648	19788-34-2	N-Nitroso-N-propylbenzenamine	N(CCC)(N=O)c1ccccc1	164.2	Shuxin Sui et al.2024
	649	22459-81-0	N-Acetyl 4-bromo-3-chloroaniline	N(C(=O)C)c1cc(Cl)c(cc1)Br	248.5	Shuxin Sui et al.2024
	650	17194-82-0	4-Hydroxyphenylacetamide	C(C(=O)N)c1ccc(cc1)O	151.16	Shuxin Sui et al.2024
	651	700-63-0	2-amino-2-phenylacetamide	C(C(=O)N)(N)c1ccccc1	150.18	Shuxin Sui et al.2024
	652	4410-31-5	2-Phenyl-2-hydroxyacetamide	C(C(=O)N)(O)c1ccccc1	151.16	Shuxin Sui et al.2024
	653	103-81-1	2-Phenylacetamide	C(C(=O)N)c1ccccc1	135.16	Shuxin Sui et al.2024
	654	55-21-0	Benzamide	C(=O)(N)c1ccccc1	121.14	Shuxin Sui et al.2024
	655	98966-14-4	N,N'-(6,6'-dihydroxy-[1,1'-biphenyl]-3,3'-diyl)diacetamide	Oc1c(cc(cc1)NC(=O)C)c1cc(NC(=O)C)ccc1O	300.31	Shuxin Sui et al.2024
	656	613-94-5	Benzoyl hydrazine	C(=O)(NN)c1ccccc1	136.15	Shuxin Sui et al.2024
	657	617-94-7	1-Phenyl-1-methylethanol	C(C)(C)(O)c1ccccc1	136.19	Shuxin Sui et al.2024
	658	538-43-2	3-Phenoxy-1,2-propanediol	O(CC(CO)O)c1ccccc1	168.19	Shuxin Sui et al.2024
	659	536-60-7	4-(1-methylethyl)-benzenemethano	C(C)(C)c1ccc(cc1)CO	150.22	Shuxin Sui et al.2024
	660	256-81-5	5H-dibenzo[a,d]cycloheptene	c12c(C=Cc3c(C1)cccc3)cccc2	192.25	Shuxin Sui et al.2024
	661	84-65-1	Anthraquinone	O=C1c2c(C(=O)c3c1cccc3)cccc2	208.21	Shuxin Sui et al.2024
	662	694-87-1	Benzocyclobutene	c12c(CC1)cccc2	104.15	Shuxin Sui et al.2024
	663	144742-38-1	Benzeneethanimine, N-chloro- (9CI)	C(/C=N/Cl)c1ccccc1	153.61	Shuxin Sui et al.2024
	664	107535-11-5	1H-Inden-5-ol, 2,3-dihydro-1-(3-hydroxy-4-methylphenyl)-1,3,3,6-tetramethyl-	CC1(c2c(C(C1)(C)C)cc(c(c2)C)O)c1cc(O)c(cc1)C	296.4	Shuxin Sui et al.2024
	665	49773-40-2	Benzeneethanimidamide, N-​chloro-	C(C(=N)NCl)c1ccccc1	168.62	Shuxin Sui et al.2024
	666	29443-41-2	Phenylethylidenehydrazine	C(/C=N/N)c1ccccc1	134.18	Shuxin Sui et al.2024
	667	2553-71-1	Bromochlorophenol Blue	O=S1(=O)OC(c2c1cccc2)(c1cc(Br)c(c(c1)Cl)O)c1cc(Br)c(c(c1)Cl)O	581.1	Shuxin Sui et al.2024
	668	21581-45-3	3,4-Dichlorophenethylamine	C(CN)c1cc(Cl)c(cc1)Cl	190.07	Shuxin Sui et al.2024
	669	83-33-0	1-Indanone	O=C1c2c(CC1)cccc2	132.16	Shuxin Sui et al.2024
	670	486-25-9	9-Fluorenone	O=C1c2c(c3c1cccc3)cccc2	180.2	Shuxin Sui et al.2024
	671	6344-60-1	1-Hydroxy-9-fluorenone	O=C1c2c(c3c1cccc3)cccc2O	196.2	Shuxin Sui et al.2024
	672	71-43-2	Benzene	c1ccccc1	78.11	Shuxin Sui et al.2024
	673	32378-82-8	1,2-Propanediol, 2-methyl-3-(phenylmethoxy)-	C(OCC(CO)(C)O)c1ccccc1	196.24	Shuxin Sui et al.2024
	674	500764-31-8	6H-Cyclobuta[jk]​phenanthrene	c12c3c4=CC=CCc4cc1cc2ccc3	200.32	Shuxin Sui et al.2024
	675	68397-57-9	Benzenemethanamine, N-dodecyl-N-methyl-	C(N(CCCCCCCCCCCC)C)c1ccccc1	289.5	Shuxin Sui et al.2024
	676	1877263-86-9	4,6-dichloro-N1,N3-bis(1,3-dihydroxypropan-2-yl)-2-iodo-5-nitroisophthalamide	C(=O)(NC(CO)CO)c1c(I)c(C(=O)NC(CO)CO)c(c(c1Cl)N(=O)=O)Cl	552.1	Shuxin Sui et al.2024
	677	1877263-85-8	4-chloro-N1,N3-bis(1,3-dihydroxypropan-2-yl)-2,6-diiodo-5-nitroisophthalamide	C(=O)(NC(CO)CO)c1c(I)c(C(=O)NC(CO)CO)c(c(c1Cl)N(=O)=O)I	643.55	Shuxin Sui et al.2024
	678	60166-98-5	5-amino-N1,N3-bis(1,3-dihydroxypropan-2-yl)-2,4,6-triiodoisophthalamide	C(=O)(NC(CO)CO)c1c(I)c(C(=O)NC(CO)CO)c(c(c1I)N)I	705.02	Shuxin Sui et al.2024
	679	1877263-84-7	N1,N3-bis(1,3-dihydroxypropan-2-yl)-2,4,6-triiodo-5-nitroisophthalamide	C(=O)(NC(CO)CO)c1c(I)c(C(=O)NC(CO)CO)c(c(c1I)N(=O)=O)I	735.01	Shuxin Sui et al.2024
	680	1877263-83-6	2-(3,5-bis((1,3-dihydroxypropan-2-yl)carbamoyl)-2,4,6-triiodophenoxy)propanoicacid	C(=O)(NC(CO)CO)c1c(I)c(C(=O)NC(CO)CO)c(c(c1I)OC(C(=O)O)C)I	778.1	Shuxin Sui et al.2024
	681	90-12-0	1-Methylnaphthalene	Cc1c2c(ccc1)cccc2	142.2	Shuxin Sui et al.2024
	682	91-57-6	2-Methylnaphthalene	Cc1cc2c(cc1)cccc2	142.2	Shuxin Sui et al.2024
	683	91-20-3	Naphthalene	c12c(cccc2)cccc1	128.17	Shuxin Sui et al.2024
	684	575-37-1	1,7-Dimethylnaphthalene_x000D_	Cc1c2c(ccc(c2)C)ccc1	156.22	Shuxin Sui et al.2024
	685	618-80-4	2,6-dichloro-4-nitrophenol	N(=O)(=O)c1cc(Cl)c(c(c1)Cl)O	208	Shuxin Sui et al.2024
	686	5847-59-6	2-bromo-4-nitrophenol	N(=O)(=O)c1cc(Br)c(cc1)O	218	Shuxin Sui et al.2024
	687	20294-55-7	2-bromo-6-chloro-4-nitrophenol	N(=O)(=O)c1cc(Br)c(c(c1)Cl)O	252.45	Shuxin Sui et al.2024
	688	99-28-5	2,6-dibromo-4-nitro-phenol	N(=O)(=O)c1cc(Br)c(c(c1)Br)O	296.9	Shuxin Sui et al.2024
	689	20294-48-8	2,4-diiodo-6-nitrophenol	N(=O)(=O)c1c(O)c(I)cc(c1)I	390.9	Shuxin Sui et al.2024
	690	305-85-1	2,6-diiodo-4-nitrophenol	N(=O)(=O)c1cc(I)c(c(c1)I)O	390.9	Shuxin Sui et al.2024
	691	484653-20-5	2,4-dibromo-6-nitrobenzenediol	N(=O)(=O)c1c(O)c(Br)c(c(c1)Br)O	312.9	Shuxin Sui et al.2024
	692	201216-27-5	chlorophenylalanylglycine	C([C@@H](C(=O)NCC(=O)O)NCl)c1ccccc1	256.69	Shuxin Sui et al.2024
	693	2095513-62-3	chlorotyrosylglycine	C([C@@H](C(=O)NCC(=O)O)NCl)c1ccc(cc1)O	272.69	Shuxin Sui et al.2024
	694	2095513-65-6	chlorotyrosylalanine	C([C@@H](C(=O)N[C@H](C(=O)O)C)NCl)c1ccc(cc1)O	286.71	Shuxin Sui et al.2024
	695	2095513-64-5	dichlorophenylalanylglycine	C([C@@H](C(=O)NCC(=O)O)N(Cl)Cl)c1ccccc1	291.13	Shuxin Sui et al.2024
	696	2095513-63-4	dichlorotyrosylglycine	[C@H](Cc1ccc(cc1)O)(C(=O)NCC(=O)O)N(Cl)Cl	307.13	Shuxin Sui et al.2024
	697	2415934-48-2	bromotyrosylglycine	C([C@@H](C(=O)NCC(=O)O)NBr)c1ccc(cc1)O	317.14	Shuxin Sui et al.2024
	698	2095513-66-7	dichlorotyrosylalanine	C([C@@H](C(=O)N[C@H](C(=O)O)C)N(Cl)Cl)c1ccc(cc1)O	321.16	Shuxin Sui et al.2024
	699	2415934-44-8	bromotyrosylalanine	C([C@@H](C(=O)N[C@H](C(=O)O)C)NBr)c1ccc(cc1)O	331.16	Shuxin Sui et al.2024
	700	2415934-51-7	N-bromo-N-chlorotyrosylglycine	[C@H](Cc1ccc(cc1)O)(C(=O)NCC(=O)O)N(Br)Cl	351.58	Shuxin Sui et al.2024
	701	2415934-45-9	N-bromo-N-chlorotyrosylalanine	C([C@@H](C(=O)N[C@H](C(=O)O)C)N(Br)Cl)c1ccc(cc1)O	365.61	Shuxin Sui et al.2024
	702	71400-72-1	(2-amino-3-(4-hydroxy-3-iodophenyl)propanoyl)glycine	C([C@@H](C(=O)NCC(=O)O)N)c1cc(I)c(cc1)O	364.14	Shuxin Sui et al.2024
	703	42934-94-1	(2-amino-3-(4-hydroxy-3-iodophenyl)propanoyl)alanine	C([C@@H](C(=O)N[C@H](C(=O)O)C)N)c1cc(I)c(cc1)O	378.16	Shuxin Sui et al.2024
	704	2415934-49-3	dibromotyrosylglycine	[C@H](Cc1ccc(cc1)O)(C(=O)NCC(=O)O)N(Br)Br	396.03	Shuxin Sui et al.2024
	705	2415934-46-0	dibromotyrosylalanine	C([C@@H](C(=O)N[C@H](C(=O)O)C)N(Br)Br)c1ccc(cc1)O	410.06	Shuxin Sui et al.2024
	706	2415934-50-6	(2-(bromoamino)-3-(4-hydroxy-3-iodophenyl)propanoyl)glycine	C([C@@H](C(=O)NCC(=O)O)NBr)c1cc(I)c(cc1)O	443.03	Shuxin Sui et al.2024
	707	2415934-47-1	(2-(bromoamino)-3-(4-hydroxy-3-iodophenyl)propanoyl)alanine	C([C@@H](C(=O)N[C@H](C(=O)O)C)NBr)c1cc(I)c(cc1)O	457.06	Shuxin Sui et al.2024
	708	1030-59-7	(2-amino-3-(4-hydroxy-3,5-diiodophenyl)propanoyl)glycine	C([C@@H](C(=O)NCC(=O)O)N)c1cc(I)c(c(c1)I)O	490.03	Shuxin Sui et al.2024
	709	42934-95-2	(2-amino-3-(4-hydroxy-3,5-diiodophenyl)propanoyl)alanine	C([C@@H](C(=O)N[C@H](C(=O)O)C)N)c1cc(I)c(c(c1)I)O	504.06	Shuxin Sui et al.2024
	710	2074608-47-0	Benzoic acid, 3-chloro-4-(dimethylamino)-, 2-ethylhexyl ester	C(=O)(OCC(CCCC)CC)c1cc(Cl)c(cc1)N(C)C	311.8	Shuxin Sui et al.2024
	711	2075745-69-4	Benzoic acid, 3-bromo-​4-​(dimethylamino)​-​, 2-​ethylhexyl ester	C(=O)(OCC(CCCC)CC)c1cc(Br)c(cc1)N(C)C	356.3	Shuxin Sui et al.2024
	712	2074606-88-3	Benzoic acid, 3-bromo-​5-​chloro-​4-​(dimethylamino)​-​, 2-​ethylhexyl ester	C(=O)(OCC(CCCC)CC)c1cc(Br)c(c(c1)Cl)N(C)C	390.7	Shuxin Sui et al.2024
	713	2075745-70-7	Benzoic acid, 3,5-​dibromo-​4-​(dimethylamino)​-​, 2-​ethylhexyl ester	C(=O)(OCC(CCCC)CC)c1cc(Br)c(c(c1)Br)N(C)C	435.2	Shuxin Sui et al.2024
	714	140-18-1	Benzyl 2-chloroacetate	C(OC(=O)CCl)c1ccccc1	184.62	Shuxin Sui et al.2024
	715	959313-38-3	Propanoic acid, 3-chloro-​, 4-​formylphenyl ester	O(C(=O)CCCl)c1ccc(cc1)C=O	212.63	Shuxin Sui et al.2024
	716	1106305-60-5	Benzoic acid, 3-chloro-​2-​hydroxy-​, phenylmethyl ester	C(=O)(OCc1ccccc1)c1c(O)c(Cl)ccc1	262.69	Shuxin Sui et al.2024
	717	860000-69-7	Benzoic acid, 3,5-​dichloro-​2-​hydroxy-​, phenylmethyl ester	C(=O)(OCc1ccccc1)c1c(O)c(Cl)cc(c1)Cl	297.1	Shuxin Sui et al.2024
	718	56529-66-9	Benzoic acid, 5-chloro-​2-​hydroxy-​, phenylmethyl ester	C(=O)(OCc1ccccc1)c1c(O)ccc(c1)Cl	262.69	Shuxin Sui et al.2024
	719	2648-61-5	2,2-dichloro-acetophenon	C(=O)(C(Cl)Cl)c1ccccc1	189.04	Shuxin Sui et al.2024
	720	532-27-4	2-Chloroacetophenone	C(=O)(CCl)c1ccccc1	154.59	Shuxin Sui et al.2024
	721	3286-91-7	(5-Chloro-2-hydroxy-4-methoxyphenyl)phenylmethanone	C(=O)(c1c(O)cc(c(c1)Cl)OC)c1ccccc1	262.69	Shuxin Sui et al.2024
	722	158547-83-2	Methanone, (3,5-dichloro-2-hydroxy-4-methoxyphenyl)phenyl-	C(=O)(c1c(O)c(Cl)c(c(c1)Cl)OC)c1ccccc1	297.1	Shuxin Sui et al.2024
	723	1087738-33-7	4-Hydroxy-3,5-diiodo-1-phenyl	C(=O)(CC(C(C(C)I)O)I)c1ccccc1	444.05	Shuxin Sui et al.2024
	724	50-84-0	2,4-Dichlorobenzoic acid	C(=O)(O)c1c(Cl)cc(cc1)Cl	191.01	Shuxin Sui et al.2024
	725	618-58-6	3,5-Dibromobenzoic acid	C(=O)(O)c1cc(Br)cc(c1)Br	279.91	Shuxin Sui et al.2024
	726	2444-36-2	2-Chlorophenylacetic acid	C(C(=O)O)c1c(Cl)cccc1	170.59	Shuxin Sui et al.2024
	727	19719-28-9	2,4-Dichlorophenylacetic acid	C(C(=O)O)c1c(Cl)cc(cc1)Cl	205.03	Shuxin Sui et al.2024
	728	14348-41-5	3-BroMo-4-hydroxybenzoic Acid	C(=O)(O)c1cc(Br)c(cc1)O	217.02	Shuxin Sui et al.2024
	729	3964-58-7	3-Chloro-4-hydroxybenzoic Acid	C(=O)(O)c1cc(Cl)c(cc1)O	172.56	Shuxin Sui et al.2024
	730	1829-32-9	3-Chlorosalicylic acid	C(=O)(O)c1c(O)c(Cl)ccc1	172.56	Shuxin Sui et al.2024
	731	52316-76-4	Phenylalanine, N-chloro-	C(C(C(=O)O)NCl)c1ccccc1	199.63	Shuxin Sui et al.2024
	732	321-14-2	5-chlorosalicylicacid	C(=O)(O)c1c(O)ccc(c1)Cl	172.56	Shuxin Sui et al.2024
	733	320-72-9	3,5-dichlorosalicylicacid	C(=O)(O)c1c(O)c(Cl)cc(c1)Cl	207.01	Shuxin Sui et al.2024
	734	3336-41-2	3,5-dichloro-4-hydroxybenzoicacid	C(=O)(O)c1cc(Cl)c(c(c1)Cl)O	207.01	Shuxin Sui et al.2024
	735	89-55-4	5-bromosalicylicacid	C(=O)(O)c1c(O)ccc(c1)Br	217.02	Shuxin Sui et al.2024
	736	36194-82-8	5-bromo-3-methyl-salicylicacid	C(=O)(O)c1c(O)c(C)cc(c1)Br	231.04	Shuxin Sui et al.2024
	737	118276-15-6	3-bromo-5-chloro-4-hydroxybenzoicacid	C(=O)(O)c1cc(Br)c(c(c1)Cl)O	251.46	Shuxin Sui et al.2024
	738	4068-58-0	3-bromo-5-chlorosalicylicacid	C(=O)(O)c1c(O)c(Br)cc(c1)Cl	251.46	Shuxin Sui et al.2024
	739	37470-46-5	3-iodo-4-hydroxybenzoicacid	C(=O)(O)c1cc(I)c(cc1)O	264.02	Shuxin Sui et al.2024
	740	1195666-68-2	3-iodo-4-hydroxy-5-methylbenzoicacid	C(=O)(O)c1cc(C)c(c(c1)I)O	278.04	Shuxin Sui et al.2024
	741	3337-62-0	3,5-dibromo-4-hydroxybenzoicacid	C(=O)(O)c1cc(Br)c(c(c1)Br)O	295.91	Shuxin Sui et al.2024
	742	3147-55-5	3,5-dibromosalicylicacid	C(=O)(O)c1c(O)c(Br)cc(c1)Br	295.91	Shuxin Sui et al.2024
	743	440111-52-4	4-hydroxy-5-iodo-1,3-benzenedicarboxylicacid	C(=O)(O)c1cc(C(=O)O)cc(c1O)I	308.03	Shuxin Sui et al.2024
	744	618-76-8	4-hydroxy-3,5-diiodobenzoicacid	C(=O)(O)c1cc(I)c(c(c1)I)O	389.91	Shuxin Sui et al.2024
	745	133-91-5	3,5-diiodosalicylicacid	C(=O)(O)c1c(O)c(I)cc(c1)I	389.91	Shuxin Sui et al.2024
	746	33257-38-4	3-formyl-4-hydroxy-5-iodo-benzoicacid	C(=O)c1cc(C(=O)O)cc(c1O)I	292.03	Shuxin Sui et al.2024
	747	6937-34-4	1,​2-​Benzenedicarboxylicacid	C(=O)(O)c1c(C(=O)O)cccc1I	292.03	Shuxin Sui et al.2024
	748	2973-76-4	5-Bromovanillin	O(C)c1c(O)c(Br)cc(c1)C=O	231.04	Shuxin Sui et al.2024
	749	2973-78-6	3-Bromo-4-hydroxybenzaldehyde,	C(=O)c1cc(Br)c(cc1)O	201.02	Shuxin Sui et al.2024
	750	2420-16-8	3-Chloro-4-hydroxybenzaldehyde	C(=O)c1cc(Cl)c(cc1)O	156.56	Shuxin Sui et al.2024
	751	952007-90-8	5-bromo-4-hydroxyisophthalaldehyde	C(=O)c1c(O)c(Br)cc(c1)C=O	229.03	Shuxin Sui et al.2024
	752	50735-77-8	Benzeneacetaldehyde, α,α-​dichloro-	C(C=O)(Cl)(Cl)c1ccccc1	189.04	Shuxin Sui et al.2024
	753	123689-69-0	Benzeneacetaldehyde, 2-chloro-​4-​hydroxy-	C(C=O)c1c(Cl)cc(cc1)O	170.59	Shuxin Sui et al.2024
	754	56962-11-9	2-Chloro-4-hydroxybenzaldehyde	C(=O)c1c(Cl)cc(cc1)O	156.56	Shuxin Sui et al.2024
	755	34841-06-0	3-Bromo-4-methoxybenzaldehyde	C(=O)c1cc(Br)c(cc1)OC	215.04	Shuxin Sui et al.2024
	756	6630-33-7	2-bromobenzaldehyde	C(=O)c1c(Br)cccc1	185.02	Shuxin Sui et al.2024
	757	2314-36-5	3,5-dichloro-4-hydroxy-benzaldehyde	C(=O)c1cc(Cl)c(c(c1)Cl)O	191.01	Shuxin Sui et al.2024
	758	1849-76-9	3-bromo-5-chloro-4-hydroxy-benzaldehyde	C(=O)c1cc(Br)c(c(c1)Cl)O	235.46	Shuxin Sui et al.2024
	759	60032-63-5	4-hydroxy-3-iodobenzaldehyde	C(=O)c1cc(I)c(cc1)O	248.02	Shuxin Sui et al.2024
	760	856767-00-5	2,6-dibromo-4-hydroxybenzaldehyde	C(=O)c1c(Br)cc(cc1Br)O	279.91	Shuxin Sui et al.2024
	761	2973-77-5	3,5-dibromo-4-hydroxybenzaldehyde	C(=O)c1cc(Br)c(c(c1)Br)O	279.91	Shuxin Sui et al.2024
	762	1948-40-9	4-hydroxy-3,5-diiodobenzaldehyde	C(=O)c1cc(I)c(c(c1)I)O	373.91	Shuxin Sui et al.2024
	763	2631-77-8	2-hydroxy-3,5-diiodobenzaldehyde	C(=O)c1c(O)c(I)cc(c1)I	373.91	Shuxin Sui et al.2024
	764	3132-99-8	3-bromobenzaldehyde	C(=O)c1cc(Br)ccc1	185.02	Shuxin Sui et al.2024
	765	1122-91-4	4-bromobenzaldehyde	C(=O)c1ccc(cc1)Br	185.02	Shuxin Sui et al.2024
	766	21702-84-1	2,4-Dibromoanisole	O(C)c1c(Br)cc(cc1)Br	265.93	Shuxin Sui et al.2024
	767	578-57-4	2-Bromoanisole	O(C)c1c(Br)cccc1	187.03	Shuxin Sui et al.2024
	768	104-92-7	4-Bromoanisole	O(C)c1ccc(cc1)Br	187.03	Shuxin Sui et al.2024
	769	607-99-8	2,4,6-Tribromoanisole	O(C)c1c(Br)cc(cc1Br)Br	344.83	Shuxin Sui et al.2024
	770	87-40-1	2,4,6-trichloro-1-methoxybenzene	O(C)c1c(Cl)cc(cc1Cl)Cl	211.5	Shuxin Sui et al.2024
	771	553-82-2	2,4-Dichloro-1-methoxy-benzene	O(C)c1c(Cl)cc(cc1)Cl	177.02	Shuxin Sui et al.2024
	772	1984-65-2	2,6-Dichloroanisole	O(C)c1c(Cl)cccc1Cl	177.02	Shuxin Sui et al.2024
	773	54135-80-7	2,3,4-Trichloroanisole	O(C)c1c(Cl)c(Cl)c(cc1)Cl	211.5	Shuxin Sui et al.2024
	774	50375-10-5	Benzene, 1,2,​4-​trichloro-​3-​methoxy-	O(C)c1c(Cl)c(Cl)ccc1Cl	211.5	Shuxin Sui et al.2024
	775	60633-25-2	2-Bromo-4-chloroanisole	O(C)c1c(Br)cc(cc1)Cl	221.48	Shuxin Sui et al.2024
	776	6575-05-9	2,4,6-Trichlorobenzonitrile	C(#N)c1c(Cl)cc(cc1Cl)Cl	206.5	Shuxin Sui et al.2024
	777	2856-63-5	2-chlorophenylacetonitrile	C(C#N)c1c(Cl)cccc1	151.59	Shuxin Sui et al.2024
	778	1529-41-5	3-chlorophenylacetonitrile	C(C#N)c1cc(Cl)ccc1	151.59	Shuxin Sui et al.2024
	779	140-53-4	4-chlorophenylacetonitrile	C(C#N)c1ccc(cc1)Cl	151.59	Shuxin Sui et al.2024
	780	6306-60-1	2,4-dichlorophenylacetonitrile	C(C#N)c1c(Cl)cc(cc1)Cl	186.03	Shuxin Sui et al.2024
	781	3218-50-6	2,5-dichlorophenylacetonitrile	C(C#N)c1c(Cl)ccc(c1)Cl	186.03	Shuxin Sui et al.2024
	782	3215-64-3	2,6-dichlorophenylacetonitrile	C(C#N)c1c(Cl)cccc1Cl	186.03	Shuxin Sui et al.2024
	783	3218-49-3	3,4-dichlorophenylacetonitrile	C(C#N)c1cc(Cl)c(cc1)Cl	186.03	Shuxin Sui et al.2024
	784	3218-45-9	2,3-dichlorophenylacetonitrile	C(C#N)c1c(Cl)c(Cl)ccc1	186.03	Shuxin Sui et al.2024
	785	19472-74-3	2-bromophenylacetonitrile	C(C#N)c1c(Br)cccc1	196.04	Shuxin Sui et al.2024
	786	31938-07-5	3-bromophenylacetonitrile	C(C#N)c1cc(Br)ccc1	196.04	Shuxin Sui et al.2024
	787	16532-79-9	4-bromophenylacetonitrile	C(C#N)c1ccc(cc1)Br	196.04	Shuxin Sui et al.2024
	788	622-25-3	1-Chloro-2-phenylethene	C(=CCl)c1ccccc1	138.59	Shuxin Sui et al.2024
	789	2039-88-5	2-bromostyrene	C(=C)c1c(Br)cccc1	183.04	Shuxin Sui et al.2024
	790	98-81-7	1-bromo-1-phenylethylene	C(=C)(Br)c1ccccc1	183.04	Shuxin Sui et al.2024
	791	100-44-7	Benzyl chloride	C(Cl)c1ccccc1	126.58	Shuxin Sui et al.2024
	792	59138-96-4	Benzene, 1-(bromomethyl)-4-(chloromethyl)-	C(Br)c1ccc(cc1)CCl	219.5	Shuxin Sui et al.2024
	793	73789-86-3	4-Isopropylbenzyl bromide	C(C)(C)c1ccc(cc1)CBr	213.11	Shuxin Sui et al.2024
	794	1808014-02-9	2-iodo-3,4,5-trihydroxy-benzenesulfonicacid	S(=O)(=O)(O)c1c(I)c(O)c(c(c1)O)O	332.07	Shuxin Sui et al.2024
	795	1808014-00-7	2-chloro-6-iodo-3,4,5-trihydroxybenzenesulfonicacid	S(=O)(=O)(O)c1c(Cl)c(O)c(c(c1I)O)O	366.52	Shuxin Sui et al.2024
	796	18777-56-5	3,5-dichloro-4-dodecylbenzenesulfonicacid	S(=O)(=O)([O-])c1ccc(cc1)CCCCCCCCCCCC	325.5	Shuxin Sui et al.2024
	797	1808014-01-8	2-bromo-6-iodo-3,4,5-trihydroxy-benzenesulfonicacid	S(=O)(=O)(O)c1c(Br)c(O)c(c(c1I)O)O	410.97	Shuxin Sui et al.2024
	798	2375197-93-4	2,6-diiodo-3,4,5-trihydroxy-benzenesulfonicacid	S(=O)(=O)(O)c1c(I)c(O)c(c(c1I)O)O	457.97	Shuxin Sui et al.2024
	799	2170110-18-4	2,6-dichloro-3,5-dihydroxy-4-dodecylbenzenesulfonicacid	C(CCCCCCCCCCC)c1c(O)c(Cl)c(c(c1O)Cl)S(=O)(=O)O	427.4	Shuxin Sui et al.2024
	800	106-48-9	4-Chlorophenol	Clc1ccc(cc1)O	128.55	Shuxin Sui et al.2024
	801	1139-52-2	4-Bromo-2,6-di-tert-butylphenol	C(C)(C)(C)c1c(O)c(C(C)(C)C)cc(c1)Br	285.22	Shuxin Sui et al.2024
	802	87-86-5	Pentachlorophenol	Clc1c(Cl)c(Cl)c(c(c1Cl)Cl)O	266.3	Shuxin Sui et al.2024
	803	695-96-5	2-Bromo-4-chlorophenol	Brc1c(O)ccc(c1)Cl	207.45	Shuxin Sui et al.2024
	804	2432-12-4	2,6-Dichloro-4-methylphenol	Oc1c(Cl)cc(cc1Cl)C	177.02	Shuxin Sui et al.2024
	805	4524-77-0	2-bromo-4,6-dichlorophenol	Oc1c(Br)cc(cc1Cl)Cl	241.89	Shuxin Sui et al.2024
	806	95-95-4	2,4,5-Trichlorophenol	Clc1c(Cl)cc(c(c1)Cl)O	197.4	Shuxin Sui et al.2024
	807	608-33-3	2,6-Dibromophenol	Oc1c(Br)cccc1Br	251.9	Shuxin Sui et al.2024
	808	4096-72-4	2,6-di-tert-butyl-4-chlorophenol	C(C)(C)(C)c1c(O)c(C(C)(C)C)cc(c1)Cl	240.77	Shuxin Sui et al.2024
	809	4018-65-9	3-Chlorocatechol	Oc1c(Cl)cccc1O	144.55	Shuxin Sui et al.2024
	810	137-19-9	4,6-Dichloro-1,3-benzenediol	Clc1c(O)cc(c(c1)Cl)O	179	Shuxin Sui et al.2024
	811	58-90-2	Phenol, 2,3,4,6-tetrachloro-	Clc1c(Cl)c(O)c(cc1Cl)Cl	231.9	Shuxin Sui et al.2024
	812	87-87-6	Tetrachlorohydroquinone	Clc1c(Cl)c(O)c(c(c1O)Cl)Cl	247.9	Shuxin Sui et al.2024
	813	2432-14-6	2,6-Dibromo-4-methylphenol	Oc1c(Br)cc(cc1Br)C	265.93	Shuxin Sui et al.2024
	814	14753-51-6	1,4-Benzenediol,2,5-dibromo-	Brc1c(O)cc(c(c1)O)Br	267.9	Shuxin Sui et al.2024
	815	87-65-0	2,6-Dichlorophenol	Oc1c(Cl)cccc1Cl	163	Shuxin Sui et al.2024
	816	26378-18-7	Phenol, 2,4,6-trichloro-3-methoxy-	O(C)c1c(Cl)c(O)c(cc1Cl)Cl	227.5	Shuxin Sui et al.2024
	817	57383-80-9	Phenol, 2,3-dibromo-	Brc1c(Br)cccc1O	251.9	Shuxin Sui et al.2024
	818	54852-68-5	2-Methyl-4-chloro-6-bromophenol	Oc1c(Br)cc(cc1C)Cl	221.48	Shuxin Sui et al.2024
	819	3964-56-5	4-Bromo-2-chlorophenol	Clc1c(O)ccc(c1)Br	207.45	Shuxin Sui et al.2024
	820	71643-66-8	4-Chloro-2-iodophenol	Ic1c(O)ccc(c1)Cl	254.45	Shuxin Sui et al.2024
	821	24967-79-1	Phenol, 2,4,6-tribromo-3-methoxy-	O(C)c1c(Br)c(O)c(cc1Br)Br	360.82	Shuxin Sui et al.2024
	822	120-83-2	2,4-dichlorophenol	Clc1c(O)ccc(c1)Cl	163	Shuxin Sui et al.2024
	823	95-57-8	2-Chlorophenol	Clc1c(O)cccc1	128.55	Shuxin Sui et al.2024
	824	95-56-7	2-bromophenol	Brc1c(O)cccc1	173.01	Shuxin Sui et al.2024
	825	106-41-2	4-bromophenol	Brc1ccc(cc1)O	173.01	Shuxin Sui et al.2024
	826	88-06-2	2,4,6-trichlorophenol	Oc1c(Cl)cc(cc1Cl)Cl	197.4	Shuxin Sui et al.2024
	827	533-58-4	2-iodophenol	Ic1c(O)cccc1	220.01	Shuxin Sui et al.2024
	828	540-38-5	4-iodophenol	Ic1ccc(cc1)O	220.01	Shuxin Sui et al.2024
	829	60577-30-2	4-iodo-2-methylphenol	Cc1c(O)ccc(c1)I	234.03	Shuxin Sui et al.2024
	830	16188-57-1	2-iodo-24-methylphenol	Ic1c(O)ccc(c1)C	234.03	Shuxin Sui et al.2024
	831	3217-15-0	2,6-dichloro-4-bromophenol	Oc1c(Cl)cc(cc1Cl)Br	241.89	Shuxin Sui et al.2024
	832	106362-66-7	2-iodo-4,5-dimethylphenol	Cc1c(C)cc(c(c1)I)O	248.06	Shuxin Sui et al.2024
	833	114971-53-8	4-iodo-2,5-dimethylphenol	Cc1c(I)cc(c(c1)O)C	248.06	Shuxin Sui et al.2024
	834	10570-67-9	4-iodo-2,6-dimethylphenol	Oc1c(C)cc(cc1C)I	248.06	Shuxin Sui et al.2024
	835	615-58-7	2,4-dibromophenol	Brc1c(O)ccc(c1)Br	251.9	Shuxin Sui et al.2024
	836	1335094-09-1	2-chloro-6-iodo-4-methyl-phenol	Oc1c(Cl)cc(cc1I)C	268.48	Shuxin Sui et al.2024
	837	5324-13-0	2,6-dibromo-4-chlorophenol	Oc1c(Br)cc(cc1Br)Cl	286.35	Shuxin Sui et al.2024
	838	34074-22-1	2,6-dichloro-4-iodophenol	Oc1c(Cl)cc(cc1Cl)I	288.89	Shuxin Sui et al.2024
	839	118-79-6	2,4,6-tribromophenol	Oc1c(Br)cc(cc1Br)Br	330.8	Shuxin Sui et al.2024
	840	2437-49-2	2,4,6-tribromoresorcinol	Oc1c(Br)c(O)c(cc1Br)Br	346.8	Shuxin Sui et al.2024
	841	2012-29-5	2,4-diiodophenol	Ic1c(O)ccc(c1)I	345.9	Shuxin Sui et al.2024
	842	28177-54-0	2,6-diiodophenol	Oc1c(I)cccc1I	345.9	Shuxin Sui et al.2024
	843	17938-68-0	4,6-diiodo-2,3-dimethyphenol	Cc1c(C)c(O)c(cc1I)I	373.96	Shuxin Sui et al.2024
	844	15459-49-1	2-chloro-4,6-diiodophenol	Oc1c(Cl)cc(cc1I)I	380.35	Shuxin Sui et al.2024
	845	609-23-4	2,4,6-triiodophenol	Oc1c(I)cc(cc1I)I	471.8	Shuxin Sui et al.2024
	846	57730-42-4	2,4,6-triiodo-1,3,5-benzenetriol	Ic1c(O)c(I)c(c(c1O)I)O	503.8	Shuxin Sui et al.2024
	847	40992-09-4	4-bromo-2-methoxy-5-methylphenol	O(C)c1c(O)cc(c(c1)Br)C	217.06	Shuxin Sui et al.2024
	848	2423-74-7	2,6-dibromo-4-methoxyphenol	O(C)c1cc(Br)c(c(c1)Br)O	281.93	Shuxin Sui et al.2024
	849	1213001-54-7	2,4,6-Triiodo-1-phenol	[C@H](NC)(C)c1c(I)c(O)c(cc1I)I	528.89	Shuxin Sui et al.2024
	850	591-35-5	3,5-dichlorophenol	Clc1cc(Cl)cc(c1)O	163	Shuxin Sui et al.2024
	851	14151-65-6	2,6-dichloro-bisphenolA	C(C)(C)(c1cc(Cl)c(c(c1)Cl)O)c1ccc(cc1)O	297.2	Shuxin Sui et al.2024
	852	79-98-1	2,2’-dichloro-bisphenolA	C(C)(C)(c1cc(Cl)c(cc1)O)c1cc(Cl)c(cc1)O	297.2	Shuxin Sui et al.2024
	853	74192-35-1	2-chloro-bisphenolA	C(C)(C)(c1cc(Cl)c(cc1)O)c1ccc(cc1)O	262.73	Shuxin Sui et al.2024
	854	40346-55-2	trichloro-bisphenolA	C(C)(C)(c1cc(Cl)c(c(c1)Cl)O)c1cc(Cl)c(cc1)O	331.6	Shuxin Sui et al.2024
	855	79-95-8	Tetrachloro-bisphenolA	C(C)(C)(c1cc(Cl)c(c(c1)Cl)O)c1cc(Cl)c(c(c1)Cl)O	366.1	Shuxin Sui et al.2024
	856	60044-33-9	2-chloro-4-nonylphenol	C(CCCCCCCC)c1cc(Cl)c(cc1)O	254.79	Shuxin Sui et al.2024
	857	102127-41-3	2,6-dichloro-4-nonylphenol	C(CCCCCCCC)c1cc(Cl)c(c(c1)Cl)O	289.2	Shuxin Sui et al.2024
	858	6073-11-6	Phenol, 2-​bromo-​4-​[1-​(4-​hydroxyphenyl)​-​1-​methylethyl]​-	C(C)(C)(c1cc(Br)c(cc1)O)c1ccc(cc1)O	307.18	Shuxin Sui et al.2024
	859	6073-08-1	Phenol, 2,​6-​dibromo-​4-​[1-​(4-​hydroxyphenyl)​-​1-​methylethyl]​-	C(C)(C)(c1cc(Br)c(c(c1)Br)O)c1ccc(cc1)O	365.2	Shuxin Sui et al.2024
	860	6386-73-8	Phenol, 2,​6-​dibromo-​4-​[1-​(3-​bromo-​4-​hydroxyphenyl)​-​1-​methylethyl]​-	C(C)(C)(c1cc(Br)c(c(c1)Br)O)c1cc(Br)c(cc1)O	465	Shuxin Sui et al.2024
	861	88953-17-7	Phenol, 4-​[1-​(4-​hydroxyphenyl)​-​1-​methylethyl]​-​2-​iodo-	C(C)(C)(c1cc(I)c(cc1)O)c1ccc(cc1)O	354.18	Shuxin Sui et al.2024
	862	1429896-33-2	Phenol, 2-​chloro-​4-​[1-​(4-​hydroxyphenyl)​-​1-​methylethyl]​-​6-​iodo-	C(C)(C)(c1cc(Cl)c(c(c1)I)O)c1ccc(cc1)O	388.63	Shuxin Sui et al.2024
	863	88953-19-9	Phenol, 4-​[1-​(4-​hydroxyphenyl)​-​1-​methylethyl]​-​2,​6-​diiodo-	C(C)(C)(c1cc(I)c(c(c1)I)O)c1ccc(cc1)O	480.08	Shuxin Sui et al.2024
	864	2606256-64-6	Phenol, 2-​bromo-​6-​chloro-​4-​[1-​(4-​hydroxyphenyl)​-​1-​methylethyl]​-	C(C)(C)(c1cc(Br)c(c(c1)Cl)O)c1ccc(cc1)O	341.62	Shuxin Sui et al.2024
	865	79-94-7	2,2-Bis(3,5-dibromo-4-hydroxyphenyl)propane	C(C)(C)(c1cc(Br)c(c(c1)Br)O)c1cc(Br)c(c(c1)Br)O	543.9	Shuxin Sui et al.2024
	866	443694-31-3	Benzenemethanol, α-​butyl-​3,​5-​dichloro-​4-​hydroxy-​α-​methyl-	C(CCCC)(C)(O)c1cc(Cl)c(c(c1)Cl)O	263.16	Shuxin Sui et al.2024
	867	443694-32-4	Benzenemethanol, 3,​5-​dichloro-​4-​hydroxy-​α-​methyl-​α-​propyl-	C(CCC)(C)(O)c1cc(Cl)c(c(c1)Cl)O	249.13	Shuxin Sui et al.2024
	868	443694-33-5	Benzenemethanol, 3,​5-​dichloro-​α-​ethyl-​4-​hydroxy-​α-​methyl-	C(CC)(C)(O)c1cc(Cl)c(c(c1)Cl)O	235.11	Shuxin Sui et al.2024
	869	443142-26-5	Benzenemethanol, 3,​5-​dichloro-​4-​hydroxy-​α,​α-​dimethyl-	C(C)(C)(O)c1cc(Cl)c(c(c1)Cl)O	221.08	Shuxin Sui et al.2024
	870	108-90-7	Chlorobenzene	Clc1ccccc1	112.55	Shuxin Sui et al.2024
	871	95-50-1	1,2-Dichlorobenzene	Clc1c(Cl)cccc1	147	Shuxin Sui et al.2024
	872	541-73-1	1,3-Dichlorobenzene	Clc1cc(Cl)ccc1	147	Shuxin Sui et al.2024
	873	106-46-7	1,4-Dichlorobenzene	Clc1ccc(cc1)Cl	147	Shuxin Sui et al.2024
	874	87-61-6	1,2,3-Trichlorobenzene	Clc1c(Cl)cccc1Cl	181.4	Shuxin Sui et al.2024
	875	120-82-1	1,2,4-Trichlorobenzene	Clc1c(Cl)ccc(c1)Cl	181.4	Shuxin Sui et al.2024
	876	51-28-5	2,4-Dinitrophenol	N(=O)(=O)c1cc(N(=O)=O)ccc1O	184.11	Shuxin Sui et al.2024
	877	100-02-7	4-Nitrophenol	N(=O)(=O)c1ccc(cc1)O	139.11	Shuxin Sui et al.2024
	878	3163-07-3	4-nitroresorcinol	N(=O)(=O)c1c(O)cc(cc1)O	155.11	Shuxin Sui et al.2024
	879	16090-33-8	2-Nitro-4-hydroxyphenol	N(=O)(=O)c1c(O)ccc(c1)O	155.11	Shuxin Sui et al.2024
	880	3316-09-4	4-Nitrocatechol	N(=O)(=O)c1cc(O)c(cc1)O	155.11	Shuxin Sui et al.2024
	881	4097-63-6	6-Methoxy-2,4-dinitrophenol	N(=O)(=O)c1c(O)c(OC)cc(c1)N(=O)=O	214.13	Shuxin Sui et al.2024
	882	1420-07-1	dinoterb	C(C)(C)(C)c1c(O)c(N(=O)=O)cc(c1)N(=O)=O	240.21	Shuxin Sui et al.2024
	883	728-40-5	4-Nitro-2,6-di-tert-butylphenol	C(C)(C)(C)c1c(O)c(C(C)(C)C)cc(c1)N(=O)=O	251.32	Shuxin Sui et al.2024
	884	104037-85-6	Benzoic acid, 2-[[3-​(1,​3-​benzodioxol-​5-​yl)​-​2-​methyl-​1-​propen-​1-​yl]​amino]​-​, methyl ester	C(C(=CNc1c(C(=O)OC)cccc1)C)c1cc2c(cc1)OCO2	325.4	Shuxin Sui et al.2024
	885	93-58-3	Methyl benzoate	C(=O)(OC)c1ccccc1	136.15	Shuxin Sui et al.2024
	886	131-11-3	Dimethyl phthalate	C(=O)(OC)c1c(C(=O)OC)cccc1	194.18	Shuxin Sui et al.2024
	887	85-68-7	Benzyl butyl phthalate	C(=O)(OCc1ccccc1)c1c(C(=O)OCCCC)cccc1	312.4	Shuxin Sui et al.2024
	888	120-50-3	Benzoic acid isobutyl	C(=O)(OCC(C)C)c1ccccc1	178.23	Shuxin Sui et al.2024
	889	117-81-7	Bis(2-ethylhexyl) phthalate	C(=O)(OCC(CCCC)CC)c1c(C(=O)OCC(CCCC)CC)cccc1	390.6	Shuxin Sui et al.2024
	890	84-74-2	Dibutyl phthalate	C(=O)(OCCCC)c1c(C(=O)OCCCC)cccc1	278.34	Shuxin Sui et al.2024
	891	84-66-2	Diethyl phthalate	C(=O)(OCC)c1c(C(=O)OCC)cccc1	222.24	Shuxin Sui et al.2024
	892	56131-48-7	Benzoic acid, 4-ethyl-, 4-cyanophenyl ester	C(=O)(Oc1ccc(cc1)C#N)c1ccc(cc1)CC	251.28	Shuxin Sui et al.2024
	893	126082-70-0	Phenyl 10-undecen-1-yl carbonate	O(C(=O)OCCCCCCCCCC=C)c1ccccc1	290.4	Shuxin Sui et al.2024
	894	23676-09-7	Ethyl 4-etoxybenzoate	C(=O)(OCC)c1ccc(cc1)OCC	194.23	Shuxin Sui et al.2024
	895	120-51-4	Benzylbenzoate	C(=O)(OCc1ccccc1)c1ccccc1	212.24	Shuxin Sui et al.2024
	896	119-61-9	Benzophenone	C(=O)(c1ccccc1)c1ccccc1	182.22	Shuxin Sui et al.2024
	897	3637-01-2	3',4'-Dimethylacetophenone	C(=O)(C)c1cc(C)c(cc1)C	148.2	Shuxin Sui et al.2024
	898	1009-61-6	1,4-Diacetylbenzene	C(=O)(C)c1ccc(cc1)C(=O)C	162.18	Shuxin Sui et al.2024
	899	703-23-1	2'-Hydroxy-6'-methoxyacetophenone	C(=O)(C)c1c(OC)cccc1O	166.17	Shuxin Sui et al.2024
	900	98-86-2	Acetophenone	C(=O)(C)c1ccccc1	120.15	Shuxin Sui et al.2024
	901	5359-04-6	Ethanone, 1-[4-(1-methylethenyl)phenyl]- (9CI)	C(=C)(C)c1ccc(cc1)C(=O)C	160.21	Shuxin Sui et al.2024
	902	54549-72-3	1-[4-(2-hydroxypropan-2-yl)phenyl]ethanone	C(C)(C)(O)c1ccc(cc1)C(=O)C	178.23	Shuxin Sui et al.2024
	903	22699-70-3	3-Ethylacetophenone	C(=O)(C)c1cc(CC)ccc1	148.2	Shuxin Sui et al.2024
	904	5337-93-9	4'-Methylpropiophenone	C(=O)(CC)c1ccc(cc1)C	148.2	Shuxin Sui et al.2024
	905	577-16-2	2'-Methylacetophenone	C(=O)(C)c1c(C)cccc1	134.17	Shuxin Sui et al.2024
	906	3152-68-9	1-phenylpent-1-en-3-one	C(=CC(=O)CC)c1ccccc1	160.21	Shuxin Sui et al.2024
	907	65-85-0	Benzoic acid	C(=O)(O)c1ccccc1	122.12	Shuxin Sui et al.2024
	908	99-06-9	3-Hydroxybenzoic acid	C(=O)(O)c1cc(O)ccc1	138.12	Shuxin Sui et al.2024
	909	528-44-9	1,2,4-Benzenetricarboxylic acid	C(=O)(O)c1c(C(=O)O)ccc(c1)C(=O)O	210.14	Shuxin Sui et al.2024
	910	99-50-3	3,4-Dihydroxybenzoic acid	C(=O)(O)c1cc(O)c(cc1)O	154.12	Shuxin Sui et al.2024
	911	121-91-5	Isophthalic acid	C(=O)(O)c1cc(C(=O)O)ccc1	166.13	Shuxin Sui et al.2024
	912	103-82-2	Phenylacetic acid	C(C(=O)O)c1ccccc1	136.15	Shuxin Sui et al.2024
	913	88-99-3	Phthalic acid	C(=O)(O)c1c(C(=O)O)cccc1	166.13	Shuxin Sui et al.2024
	914	554-95-0	Trimesic acid	C(=O)(O)c1cc(C(=O)O)cc(c1)C(=O)O	210.14	Shuxin Sui et al.2024
	915	569-51-7	1,2,3-Benzenetricarboxylic acid	C(=O)(O)c1c(C(=O)O)cccc1C(=O)O	210.14	Shuxin Sui et al.2024
	916	609-99-4	3,5-Dinitrosalicylic acid	C(=O)(O)c1c(O)c(N(=O)=O)cc(c1)N(=O)=O	228.12	Shuxin Sui et al.2024
	917	616-82-0	4-Hydroxy-3-nitrobenzoic acid	N(=O)(=O)c1cc(C(=O)O)ccc1O	183.12	Shuxin Sui et al.2024
	918	96-97-9	5-Nitrosalicylic acid	C(=O)(O)c1cc(N(=O)=O)ccc1O	183.12	Shuxin Sui et al.2024
	919	476-73-3	benzene-1,2,3,4-tetracarboxylic acid	C(=O)(O)c1c(C(=O)O)c(C(=O)O)ccc1C(=O)O	254.15	Shuxin Sui et al.2024
	920	99-04-7	m-Toluic acid	C(=O)(O)c1cc(C)ccc1	136.15	Shuxin Sui et al.2024
	921	99-94-5	p-Toluic acid	C(=O)(O)c1ccc(cc1)C	136.15	Shuxin Sui et al.2024
	922	89-05-4	Pyromellitic acid	C(=O)(O)c1c(C(=O)O)cc(c(c1)C(=O)O)C(=O)O	254.15	Shuxin Sui et al.2024
	923	69-72-7	Salicylic acid	C(=O)(O)c1c(O)cccc1	138.12	Shuxin Sui et al.2024
	924	479-47-0	1,2,3,5-Benzenetetracarboxylic acid	C(=O)(O)c1c(C(=O)O)cc(cc1C(=O)O)C(=O)O	254.15	Shuxin Sui et al.2024
	925	85-38-1	3-Nitrosalicylic acid	C(=O)(O)c1c(O)c(N(=O)=O)ccc1	183.12	Shuxin Sui et al.2024
	926	610-27-5	4-Nitrophthalic acid	C(=O)(O)c1c(C(=O)O)ccc(c1)N(=O)=O	211.13	Shuxin Sui et al.2024
	927	100-21-0	Terephthalic acid	C(=O)(O)c1ccc(cc1)C(=O)O	166.13	Shuxin Sui et al.2024
	928	1421-34-7	2-Hydrazinyl-3-phenylpropanoic acid	C(C(C(=O)O)NN)c1ccccc1	180.2	Shuxin Sui et al.2024
	929	7330-46-3	6,6'-Diamino-3,3'-methanediyl-di-benzoic acid	C(c1cc(C(=O)O)c(cc1)N)c1cc(C(=O)O)c(cc1)N	286.28	Shuxin Sui et al.2024
	930	552-16-9	2-Nitrobenzoic acid	C(=O)(O)c1c(N(=O)=O)cccc1	167.12	Shuxin Sui et al.2024
	931	118-90-1	o-Toluic acid	C(=O)(O)c1c(C)cccc1	136.15	Shuxin Sui et al.2024
	932	62-23-7	p-Nitrobenzoic acid	C(=O)(O)c1ccc(cc1)N(=O)=O	167.12	Shuxin Sui et al.2024
	933	619-64-7	4-Ethylbenzoic acid	C(=O)(O)c1ccc(cc1)CC	150.17	Shuxin Sui et al.2024
	934	100-52-7	Benzaldehyde	C(=O)c1ccccc1	106.12	Shuxin Sui et al.2024
	935	1194-98-5	2,5-Dihydroxybenzaldehyde	C(=O)c1c(O)ccc(c1)O	138.12	Shuxin Sui et al.2024
	936	620-23-5	m-Tolualdehyde	C(=O)c1cc(C)ccc1	120.15	Shuxin Sui et al.2024
	937	6635-20-7	5-Nitrovanillin	N(=O)(=O)c1c(O)c(OC)cc(c1)C=O	197.14	Shuxin Sui et al.2024
	938	104-55-2	Cinnamaldehyde	C(=CC=O)c1ccccc1	132.16	Shuxin Sui et al.2024
	939	626-19-7	m-Phthalaldehyde	C(=O)c1cc(C=O)ccc1	134.13	Shuxin Sui et al.2024
	940	122-78-1	Phenylacetaldehyde	C(C=O)c1ccccc1	120.15	Shuxin Sui et al.2024
	941	123-11-5	p-Anisaldehyde	C(=O)c1ccc(cc1)OC	136.15	Shuxin Sui et al.2024
	942	104-87-0	p-Tolualdehyde	C(=O)c1ccc(cc1)C	120.15	Shuxin Sui et al.2024
	943	4748-78-1	4-Ethylbenzaldehyde	C(C)c1ccc(cc1)C=O	134.17	Shuxin Sui et al.2024
	944	18278-34-7	4-Hydroxy-2-methoxybenzaldehyde	C(=O)c1c(OC)cc(cc1)O	152.15	Shuxin Sui et al.2024
	945	100-47-0	Benzonitrile	C(#N)c1ccccc1	103.12	Shuxin Sui et al.2024
	946	1885-38-7	Cinnamonitrile	C(=C\C#N)/c1ccccc1	129.16	Shuxin Sui et al.2024
	947	529-19-1	o-Tolunitrile	C(#N)c1c(C)cccc1	117.15	Shuxin Sui et al.2024
	948	140-29-4	phenylacetonitrile	C(C#N)c1ccccc1	117.15	Shuxin Sui et al.2024
	949	849065-42-5	Benzene, 4-methyl-​1,​2-​bis(1-​methylethenyl)​-	C(=C)(C)c1c(C(=C)C)cc(cc1)C	172.27	Shuxin Sui et al.2024
	950	3454-07-7	1-Ethenyl-4-ethylbenzene	C(C)c1ccc(cc1)C=C	132.2	Shuxin Sui et al.2024
	951	100-42-5	Styrene	C(=C)c1ccccc1	104.15	Shuxin Sui et al.2024
	952	7525-62-4	3-ethylstyrene	C(C)c1cc(C=C)ccc1	132.2	Shuxin Sui et al.2024
	953	95-63-6	1,2,4-Trimethylbenzene	Cc1c(C)ccc(c1)C	120.19	Shuxin Sui et al.2024
	954	874-41-9	4-ethyl-1,3-dimethylbenzene	C(C)c1c(C)cc(cc1)C	134.22	Shuxin Sui et al.2024
	955	138-42-1	4-Nitrobenzenesulfonic acid	S(=O)(=O)(O)c1ccc(cc1)N(=O)=O	203.17	Shuxin Sui et al.2024
	956	106-44-5	p-Cresol	Cc1ccc(cc1)O	108.14	Shuxin Sui et al.2024
	957	4130-42-1	2,6-Ditert-butyl-4-ethylphenol	C(C)(C)(C)c1c(O)c(C(C)(C)C)cc(c1)CC	234.38	Shuxin Sui et al.2024
	958	108-39-4	m-Cresol	Cc1cc(O)ccc1	108.14	Shuxin Sui et al.2024
	959	534-82-7	3-Methoxy-4-hydroxyphenethylene glycol	C(CO)(O)c1cc(OC)c(cc1)O	184.19	Shuxin Sui et al.2024
	960	95-48-7	o-Cresol	Cc1c(O)cccc1	108.14	Shuxin Sui et al.2024
	961	93995-38-1	2-chloro-estrone	C[C@@]12[C@H]([C@H]3[C@H](CC1)c1c(CC3)cc(c(c1)Cl)O)CCC2=O	304.8	Shuxin Sui et al.2024
	962	14984-44-2	4-chloro-estrone	C[C@@]12[C@H]([C@H]3[C@H](CC1)c1c(CC3)c(Cl)c(cc1)O)CCC2=O	304.8	Shuxin Sui et al.2024
	963	93947-11-6	2,4-dichloro-estrone	C[C@@]12[C@H]([C@H]3[C@H](CC1)c1c(CC3)c(Cl)c(c(c1)Cl)O)CCC2=O	339.3	Shuxin Sui et al.2024
	964	88847-88-5	4-chloro-17β-estradiol	C[C@@]12[C@H]([C@H]3[C@H](CC1)c1c(CC3)c(Cl)c(cc1)O)CC[C@@H]2O	306.8	Shuxin Sui et al.2024
	965	25940-39-0	2,4-dichloro-17β-estradiol	C[C@@]12[C@H]([C@H]3[C@H](CC1)c1c(CC3)c(Cl)c(c(c1)Cl)O)CC[C@@H]2O	341.3	Shuxin Sui et al.2024
	966	571-92-6	Estra-​1,​3,​5(10)​-​trien-​6-​one, 3,​17-​dihydroxy-​, (17β)​-	C[C@@]12[C@H]([C@H]3[C@H](CC1)c1c(C(=O)C3)cc(cc1)O)CC[C@@H]2O	286.4	Shuxin Sui et al.2024
	967	1229-24-9	Estra-​1,​3,​5(10)​-​triene-​3,​6,​17-​triol, (6α,​17β)​-	C[C@@]12[C@H]([C@H]3[C@H](CC1)c1c([C@H](C3)O)cc(cc1)O)CC[C@@H]2O	288.4	Shuxin Sui et al.2024
	968	362-05-0	Estra-​1,​3,​5(10)​-​triene-​2,​3,​17-​triol, (17β)​-	C[C@@]12[C@H]([C@H]3[C@H](CC1)c1c(CC3)cc(c(c1)O)O)CC[C@@H]2O	288.4	Shuxin Sui et al.2024
	969	53-16-7	Estra-​1,​3,​5(10)​-​trien-​17-​one, 3-​hydroxy-	C[C@@]12[C@H]([C@H]3[C@H](CC1)c1c(CC3)cc(cc1)O)CCC2=O	270.4	Shuxin Sui et al.2024
	970	1150-90-9	Estra-​1,​3,​5(10)​,​16-​tetraen-​3-​ol	C[C@@]12[C@H]([C@H]3[C@H](CC1)c1c(CC3)cc(cc1)O)CC=C2	254.4	Shuxin Sui et al.2024
	971	1158651-82-1	17,​18-​Cycloestra-​1,​3,​5(10)​-​trien-​3-​ol, (17β)​-	Oc1cc2c(cc1)[C@@H]1[C@@H](CC2)[C@H]2[C@]3(CC1)[C@@H](C3)CC2	254.37	Shuxin Sui et al.2024
	972	791-69-5	Estra-​1,​3,​5(10)​,​9(11)​-​tetraene-​3,​17-​diol, (17β)​-	C[C@@]12[C@H]([C@H]3C(=CC1)c1c(CC3)cc(cc1)O)CC[C@@H]2O	270.4	Shuxin Sui et al.2024
	973	50-27-1	Estra-​1,​3,​5(10)​-​triene-​3,​16,​17-​triol, (16α,​17β)​-	C[C@]12[C@H]([C@H]3[C@H](CC2)c2c(CC3)cc(cc2)O)C[C@H]([C@@H]1O)O	288.4	Shuxin Sui et al.2024
	974	7291-41-0	Estra-​1,​3,​5(10)​,​6-​tetraene-​3,​17-​diol, (17β)​-	C[C@@]12[C@H]([C@H]3[C@H](CC1)c1c(C=C3)cc(cc1)O)CC[C@@H]2O	270.4	Shuxin Sui et al.2024
	975	637780-38-2	5H-​Inden-​5-​one, 4-​[2-​(2,​4-​dichloro-​5-​hydroxyphenyl)​ethyl]​octahydro-​1-​hydroxy-​7a-​methyl-	CC12C(C(CCc3c(Cl)cc(c(c3)O)Cl)C(=O)CC2)CCC1O	357.27	Shuxin Sui et al.2024
	976	137576-16-0	19-​Norpregna-​1,​3,​5(10)​-​trien-​20-​yne-​3,​17-​diol, 4-​chloro-​, (17α)​-	C[C@]12[C@H]([C@H]3[C@H](CC2)c2c(CC3)c(Cl)c(cc2)O)CC[C@]1(C#C)O	330.8	Shuxin Sui et al.2024
	977	147-82-0	2,4,6-Tribromoaniline	Nc1c(Br)cc(cc1Br)Br	329.81	Shuxin Sui et al.2024
	978	51218-45-2	Metolachlor	N(C(COC)C)(C(=O)CCl)c1c(CC)cccc1C	283.79	Shuxin Sui et al.2024
	979	21402-26-6	3-Chloro-4-Bromoaniline	Clc1c(Br)ccc(c1)N	206.47	Shuxin Sui et al.2024
	980	62-53-3	Aniline	Nc1ccccc1	93.13	Shuxin Sui et al.2024
	981	118205-63-3	Bicyclo[2.2.1]heptane, 5-​methoxy-​2,​3-​bis(methylene)​-​, (1R-​endo)​- (9CI)	O(C)[C@H]1[C@H]2C(=C)C(=C)[C@@H](C1)C2	150.22	Shuxin Sui et al.2024
	982	42261-16-5	Estra-​1(10)​,​4-​diene-​2,​3-​dione, 17-​hydroxy-​, (17β)​-	C[C@@]12[C@H]([C@H]3[C@H](CC1)C1=CC(=O)C(=O)C=C1CC3)CC[C@@H]2O	286.4	Shuxin Sui et al.2024
	983	549-02-0	Estra-​1,​4-​dien-​3-​one, 10,​17-​dihydroxy-​, (17β)​-	O[C@@]12[C@@H]3[C@H]([C@H]4[C@@](CC3)(C)[C@H](CC4)O)CCC1=CC(=O)C=C2	288.4	Shuxin Sui et al.2024
	984	58-22-0	Androst-​4-​en-​3-​one, 17-​hydroxy-​, (17β)​-	C[C@@]12[C@@H]3[C@H]([C@H]4[C@@](CC3)(C)[C@H](CC4)O)CCC1=CC(=O)CC2	288.4	Shuxin Sui et al.2024
	985	2162-39-2	Estr-​4-​en-​3-​one, 10,​17-​dihydroxy-​, (17β)​-	O[C@@]12[C@@H]3[C@H]([C@H]4[C@@](CC3)(C)[C@H](CC4)O)CCC1=CC(=O)CC2	290.4	Shuxin Sui et al.2024
	986	2133-53-1	Estr-​4-​en-​3-​one, 11,​17-​dihydroxy-​, (11α,​17β)​-	O[C@H]1[C@H]2[C@H]([C@H]3[C@@](C1)(C)[C@@H](O)CC3)CCC1=CC(=O)CC[C@H]21	290.4	Shuxin Sui et al.2024
	987	1035121-28-8	7H-​Benz[e]​inden-​7-​one, 1,​2,​3,​3a,​4,​5,​5a,​6,​9a,​9b-​decahydro-​3-​hydroxy-​3a-​methyl-​, (3S,​3aS,​5aR,​9aS,​9bS)​-	C[C@@]12[C@H]([C@H]3[C@H](CC1)CC(=O)C=C3)CC[C@@H]2O	220.31	Shuxin Sui et al.2024
	988	873662-36-3	Acetic acid, 2-​[6-​(carboxymethylene)​dodecahydro-​3-​hydroxy-​3a-​methyl-​7H-​benz[e]​inden-​7-​ylidene]​-	C(=C1C2C(C3C(CC2)(C)C(CC3)O)CCC1=CC(=O)O)C(=O)O	320.38	Shuxin Sui et al.2024
	989	873662-34-1	1H-​Benz[e]​indene-​7-​carboxylic acid, 6-​(2-​carboxyethenyl)​-​2,​3,​3a,​4,​5,​5a,​8,​9,​9a,​9b-​decahydro-​3-​hydroxy-​3a-​methyl-	C(=CC(=O)O)C1=C(C(=O)O)CCC2C1CCC1(C2CCC1O)C	320.38	Shuxin Sui et al.2024
	990	2455-32-0	1H-​Indene-​4-​propanoic acid, 5-​carboxyoctahydro-​7a-​methyl-​1-​oxo-	C(CC(=O)O)C1C2C(C)(CCC1C(=O)O)C(=O)CC2	268.1	Shuxin Sui et al.2024
	991	944703-52-0	1H-​Indene-​1,​5-​dicarboxylic acid, 4-​(2-​carboxyethyl)​octahydro-​1-​hydroxy-​7a-​methyl-	CC12C(C(=O)O)(O)CCC1C(CCC(=O)O)C(CC2)C(=O)O	314.33	Shuxin Sui et al.2024
	992	86846-55-1	Estra-​1,​4-​dien-​3-​one, 10-​hydroperoxy-​17-​hydroxy-​, (17β)​- (9CI)	O(O)[C@@]12[C@@H]3[C@H]([C@H]4[C@@](CC3)(C)[C@H](CC4)O)CCC1=CC(=O)C=C2	304.38	Shuxin Sui et al.2024
	993	73567-91-6	2,5-Cyclohexadien-1-one, 2,3,6-trichloro-4-(chloroimino)-	N(=C\1/C(=C(Cl)C(=O)C(=C1)Cl)Cl)\Cl	244.89	Shuxin Sui et al.2024
	994	88552-47-0	4-Cyclopentene-1,3-dione, 2,2,4-trichloro-	ClC1(Cl)C(=O)C(=CC1=O)Cl	199.41	Shuxin Sui et al.2024
	995	822-87-7	2-Chlorocyclohexanone	ClC1C(=O)CCCC1	132.59	Shuxin Sui et al.2024
	996	89281-35-6	2-Cyclopentene-​1-​carboxylic acid, 3,​5-​dichloro-​1-​hydroxy-​4-​oxo-	C(=O)(O)C1(O)C(Cl)C(=O)C(=C1)Cl	211	Shuxin Sui et al.2024
	997	938165-22-1	4-Cyclohexene-​1,​2,​3-​trione, 4,​5,​6,​6-​tetrachloro-	ClC1=C(Cl)C(=O)C(=O)C(=O)C1(Cl)Cl	261.87	Shuxin Sui et al.2024
	998	24963-41-5	4-Cyclopentene-1,3-dione, 2,2,4-trichloro-5-hydroxy-	ClC1(Cl)C(=O)C(=C(C1=O)O)Cl	215.41	Shuxin Sui et al.2024
	999	89284-89-9	4-Cyclopentene-​1,​3-​dione, 2,​2,​4-​trichloro-​5-​methoxy-	O(C)C1=C(Cl)C(=O)C(C1=O)(Cl)Cl	229.4	Shuxin Sui et al.2024
	1000	861573-86-6	4-Cyclopentene-​1,​3-​dione, 2,​2-​dibromo-​4-​chloro-​5-​hydroxy-	BrC1(Br)C(=O)C(=C(C1=O)O)Cl	304.32	Shuxin Sui et al.2024
	1001	412281-18-6	4-Cyclopentene-​1,​3-​dione, 2,​2,​4-​tribromo-​5-​hydroxy-	BrC1(Br)C(=O)C(=C(C1=O)O)Br	348.77	Shuxin Sui et al.2024
	1002	1948261-72-0	4-Cyclopentene-​1,​3-​dione, 2-​bromo-​2,​4-​dichloro-​5-​hydroxy-	BrC1(Cl)C(=O)C(=C(C1=O)O)Cl	259.87	Shuxin Sui et al.2024
	1003	77-47-4	Hexachlorocyclopentadiene	ClC1(Cl)C(=C(C(=C1Cl)Cl)Cl)Cl	272.8	Shuxin Sui et al.2024
	1004	6262-42-6	Tetrachlorocyclopropene	ClC1(Cl)C(=C1Cl)Cl	177.8	Shuxin Sui et al.2024
	1005	634-85-5	2,3,5-Trichloro-p-benzoquinone	ClC1=C(Cl)C(=O)C(=CC1=O)Cl	211.4	Shuxin Sui et al.2024
	1006	40100-98-9	3,5-Dichloro-2-methyl-1,4-benzoquinone	CC1=C(Cl)C(=O)C(=CC1=O)Cl	191.01	Shuxin Sui et al.2024
	1007	118-75-2	Chloranil	ClC1=C(Cl)C(=O)C(=C(C1=O)Cl)Cl	245.9	Shuxin Sui et al.2024
	1008	38969-08-3	2,5-Cyclohexadiene-1,4-dione, 2,3-dibromo-5,6-dimethyl-	BrC1=C(Br)C(=O)C(=C(C1=O)C)C	293.94	Shuxin Sui et al.2024
	1009	20389-01-9	2,6-Diiodo-4-benzoquinone	O=C1C(=CC(=O)C=C1I)I	359.89	Shuxin Sui et al.2024
	1010	89465-84-9	2,5-​Cyclohexadiene-​1,​4-​dione, 3,​5-​dichloro-​2-​hydroxy-	O=C1C(=C(O)C(=O)C=C1Cl)Cl	192.98	Shuxin Sui et al.2024
	1011	877-13-4	2,5-Cyclohexadiene-1,4-dione, 2,3,5-trichloro-6-hydroxy-	ClC1=C(Cl)C(=O)C(=C(C1=O)Cl)O	227.4	Shuxin Sui et al.2024
	1012	88207-74-3	2,5-Cyclohexadiene-1,4-dione, 2,6-dichloro-3-hydroxy-5-methyl-	CC1=C(Cl)C(=O)C(=C(C1=O)O)Cl	207.01	Shuxin Sui et al.2024
	1013	1430850-54-6	2,5-​Cyclohexadiene-​1,​4-​dione, 3,​5-​dibromo-​2-​hydroxy-	O=C1C(=C(O)C(=O)C=C1Br)Br	281.89	Shuxin Sui et al.2024
	1014	615-93-0	2,5-Dichlorobenzo-1,4-quinone	ClC1=CC(=O)C(=CC1=O)Cl	176.98	Shuxin Sui et al.2024
	1015	1633-14-3	2,5-Dibromo-1,4-benzoquinone	BrC1=CC(=O)C(=CC1=O)Br	265.89	Shuxin Sui et al.2024
	1016	488-48-2	p-Bromanil	BrC1=C(Br)C(=O)C(=C(C1=O)Br)Br	423.68	Shuxin Sui et al.2024
	1017	2435-54-3	o-Bromanil	BrC1=C(Br)C(=O)C(=O)C(=C1Br)Br	423.68	Shuxin Sui et al.2024
	1018	697-91-6	2,6-Dichloro-p-benzoquinone（DCBQ）	O=C1C(=CC(=O)C=C1Cl)Cl	176.98	Shuxin Sui et al.2024
	1019	19643-45-9	2,6-Dibromo-p-benzoquinone（DBBQ）	O=C1C(=CC(=O)C=C1Br)Br	265.89	Shuxin Sui et al.2024
	1020	2435-53-2	3,4,5,6-Tetrachloro-1,2-benzoquinone	ClC1=C(Cl)C(=O)C(=O)C(=C1Cl)Cl	245.9	Shuxin Sui et al.2024
	1021	10152-61-1	Cyclopropaneoctanoic acid, 2-hexyl-​, methyl ester	C(CCCCCCC(=O)OC)C1C(C1)CCCCCC	282.5	Shuxin Sui et al.2024
	1022	5452-75-5	Ethyl 2-cyclohexylacetate	C(C(=O)OCC)C1CCCCC1	170.25	Shuxin Sui et al.2024
	1023	77142-84-8	1-Propanone, 1-​(3-​acetyl-​2,​2-​dimethylcyclopropyl)​-​2-​methyl-	C(=O)(C(C)C)C1C(C1(C)C)C(=O)C	182.26	Shuxin Sui et al.2024
	1024	1125-21-9	2,6,6-Trimethyl-2-cyclohexene-1,4-dione	O=C1C(C)(C)CC(=O)C=C1C	152.19	Shuxin Sui et al.2024
	1025	10407-33-7	methyl 3-(2-oxocyclohexyl)propanoate	C(CC(=O)OC)C1C(=O)CCCC1	184.23	Shuxin Sui et al.2024
	1026	6672-30-6	(3R)-3-Methylcyclopentanone	C[C@H]1CC(=O)CC1	98.14	Shuxin Sui et al.2024
	1027	1128-08-1	2-Pentyl-3-methyl-2-cyclopenten-1-one	C(CCCC)C1=C(C)CCC1=O	166.26	Shuxin Sui et al.2024
	1028	1757-42-2	3-Methylcyclopentanone	CC1CC(=O)CC1	98.14	Shuxin Sui et al.2024
	1029	108-94-1	Cyclohexanone	O=C1CCCCC1	98.14	Shuxin Sui et al.2024
	1030	4041-09-2	2,5-dimethylcyclopentan-1-one	O=C1C(C)CCC1C	112.17	Shuxin Sui et al.2024
	1031	4505-54-8	5-Methylcyclopentane-1,2,4-trione	CC1C(=O)C(=O)CC1=O	126.11	Shuxin Sui et al.2024
	1032	28790-86-5	2,3,4-trimethylcyclopent-2-en-1-one	CC1=C(C)C(=O)CC1C	124.18	Shuxin Sui et al.2024
	1033	766-93-8	N-Cyclohexylformamide	N(C=O)C1CCCCC1	127.18	Shuxin Sui et al.2024
	1034	13151-81-0	(1-Pentylhexyl)cyclohexane	C(CCCCC)(CCCCC)C1CCCCC1	238.5	Shuxin Sui et al.2024
	1035	5729-54-4	Cyclohexane, 4-penten-1-yl-	C(CCC=C)C1CCCCC1	152.28	Shuxin Sui et al.2024
	1036	3726-46-3	Cyclopentane, 1-ethyl-2-methyl-	C(C)C1C(C)CCC1	112.21	Shuxin Sui et al.2024
	1037	6165-44-2	1,1'-(1,4-Butanediyl)biscyclohexane	C(CCCC1CCCCC1)C1CCCCC1	222.41	Shuxin Sui et al.2024
	1038	13151-82-1	2-Cyclohexyldodecane	C(CCCCCCCCCC)(C)C1CCCCC1	252.5	Shuxin Sui et al.2024
	1039	293-96-9	Cyclodecane	C1CCCCCCCCC1	140.27	Shuxin Sui et al.2024
	1040	294-62-2	Cyclododecan	C1CCCCCCCCCCC1	168.32	Shuxin Sui et al.2024
	1041	2207-01-4	1,2-cis-DimethyIcyclohexane	C[C@H]1[C@@H](C)CCCC1	112.21	Shuxin Sui et al.2024
	1042	638-04-0	Cyclohexane, 1,3-​dimethyl-​, (1R,​3S)​-​rel-	C[C@H]1C[C@@H](C)CCC1	112.21	Shuxin Sui et al.2024
	1043	498-81-7	Dihydro-alpha-terpineol1-Methyl-4-isopropylcyclohexane-8-ol	C(C)(C)(O)C1CCC(CC1)C	156.26	Shuxin Sui et al.2024
	1044	5617-41-4	Heptylcyclohexane	C(CCCCCC)C1CCCCC1	182.35	Shuxin Sui et al.2024
	1045	2883-02-5	Nonylcylohexane	C(CCCCCCCC)C1CCCCC1	210.4	Shuxin Sui et al.2024
	1046	1472-09-9	Octylcyclopropane	C(CCCCCCC)C1CC1	154.29	Shuxin Sui et al.2024
	1047	55030-20-1	1,1'-Hexylidenedicyclohexane	C(CCCCC)(C1CCCCC1)C1CCCCC1	250.5	Shuxin Sui et al.2024
	1048	41977-45-1	7-Pentylbicyclo[4.1.0]heptane	C(CCCC)C1C2C1CCCC2	166.3	Shuxin Sui et al.2024
	1049	61142-06-1	Benzocyclodecene, tetradecahydro-	C12C(CCCC1)CCCCCCCC2	194.36	Shuxin Sui et al.2024
	1050	54549-80-3	2-Ethyl-1,1-dimethylcyclopentane	C(C)C1C(C)(C)CCC1	126.24	Shuxin Sui et al.2024
	1051	645-10-3	germacrane	C(C)(C)[C@H]1CC[C@@H](C)CCC[C@H](CC1)C	210.4	Shuxin Sui et al.2024
	1052	53366-38-4	2-Methylbutylcyclopentane	C(C(CC)C)C1CCCC1	140.27	Shuxin Sui et al.2024
	1053	13151-99-0	Cyclooctane, 1,4-dimethyl-, (1R,4S)-rel-	C[C@H]1CC[C@@H](C)CCCC1	140.27	Shuxin Sui et al.2024
	1054	54889-87-1	Cyclohexane, 1,1'-​(1,​2-​dimethyl-​1,​2-​ethanediyl)​bis-​, (R*,​R*)​- (9CI)	[C@H]([C@@H](C)C1CCCCC1)(C)C1CCCCC1	222.41	Shuxin Sui et al.2024
	1055	719-22-2	2,6-Di-tert-butyl-p-benzoquinone	C(C)(C)(C)C1=CC(=O)C=C(C1=O)C(C)(C)C	220.31	Shuxin Sui et al.2024
	1056	106-51-4	1,4-Benzoquinone	O=C1C=CC(=O)C=C1	108.09	Shuxin Sui et al.2024
	1057	938165-32-3	2-Cyclopentene-​1-​carboxylic acid, 1,​3,​5,​5-​tetrachloro-​4-​hydroxy-	C(=O)(O)C1(Cl)C(Cl)(Cl)C(C(=C1)Cl)O	265.91	Shuxin Sui et al.2024
	1058	5631-24-3	Cyclopentanol, 3-methyl-, cis-	C[C@H]1C[C@H](CC1)O	100.16	Shuxin Sui et al.2024
	1059	89794-28-5	Cyclopentanol, 2,4-dimethyl-	CC1C(O)CC(C1)C	114.19	Shuxin Sui et al.2024
	1060	60-27-5	Creatinine	NC1=NC(=O)CN1C	113.12	Shuxin Sui et al.2024
	1061	108-31-6	Maleic anhydride	O=C1OC(=O)C=C1	98.06	Shuxin Sui et al.2024
	1062	616-02-4	Citraconic anhydride	CC1=CC(=O)OC1=O	112.08	Shuxin Sui et al.2024
	1063	766-39-2	2,3-Dimethylmaleic anhydride	CC1=C(C)C(=O)OC1=O	126.11	Shuxin Sui et al.2024
	1064	3552-33-8	3-ethyl-4-methyl-furan-2,5-dione	C(C)C1=C(C)C(=O)OC1=O	140.14	Shuxin Sui et al.2024
	1065	57547-55-4	3-chloro-4-methyl-furan-2,5-dione	CC1=C(Cl)C(=O)OC1=O	146.53	Shuxin Sui et al.2024
	1066	1122-17-4	Dichloromaleic anhydride	ClC1=C(Cl)C(=O)OC1=O	166.94	Shuxin Sui et al.2024
	1067	5926-51-2	2,5-Furandione, 3-bromo-	BrC1=CC(=O)OC1=O	176.95	Shuxin Sui et al.2024
	1068	85-44-9	Phthalic anhydride	O=C1c2c(C(=O)O1)cccc2	148.11	Shuxin Sui et al.2024
	1069	46324-06-5	2,5-Furandione,dihydro-3-(phenylmethylene)-	C(=C1C(=O)OC(=O)C1)c1ccccc1	188.18	Shuxin Sui et al.2024
	1070	615-20-3	2-Chlorobenzothiazole	Clc1nc2c(s1)cccc2	169.63	Shuxin Sui et al.2024
	1071	2516-40-7	2-Bromo-1,3-benzothiazole	Brc1nc2c(s1)cccc2	214.08	Shuxin Sui et al.2024
	1072	19432-68-9	Methyl 2-thienylacetate	C(C(=O)OC)c1cccs1	156.2	Shuxin Sui et al.2024
	1073	59-89-2	N-nitrosomorpholine	N(=O)N1CCOCC1	116.12	Shuxin Sui et al.2024
	1074	4164-32-3	N-nitromorpholine	N(=O)(=O)N1CCOCC1	132.12	Shuxin Sui et al.2024
	1075	1072-67-9	3-Amino-5-methylisoxazole	Nc1cc(on1)C	98.1	Shuxin Sui et al.2024
	1076	3301-94-8	delta-Nonalactone	C(CCC)C1OC(=O)CCC1	156.22	Shuxin Sui et al.2024
	1077	5336-08-3	D(+)-Ribonic acid gamma-lactone	C(O)[C@@H]1[C@@H](O)[C@H](C(=O)O1)O	148.11	Shuxin Sui et al.2024
	1078	104-61-0	gamma-Nonanolactone	C(CCCC)C1OC(=O)CC1	156.22	Shuxin Sui et al.2024
	1079	104-50-7	gamma-Octanoic lactone	C(CCC)C1OC(=O)CC1	142.2	Shuxin Sui et al.2024
	1080	502-26-1	5-tetradecyloxolan-2-one	C(CCCCCCCCCCCCC)C1CCC(=O)O1	282.5	Shuxin Sui et al.2024
	1081	823-22-3	delta-Hexalactone	CC1OC(=O)CCC1	114.14	Shuxin Sui et al.2024
	1082	706-14-9	gamma-Decalactone	C(CCCCC)C1OC(=O)CC1	170.25	Shuxin Sui et al.2024
	1083	730-46-1	Hexadeca-1,4-Lactone	C(CCCCCCCCCCC)C1OC(=O)CC1	254.41	Shuxin Sui et al.2024
	1084	3301-90-4	6-ethyltetrahydro-2H-pyran-2-one	C(C)C1OC(=O)CCC1	128.17	Shuxin Sui et al.2024
	1085	105-21-5	4-Heptanolide	C(CC)C1OC(=O)CC1	128.17	Shuxin Sui et al.2024
	1086	2305-05-7	4-Dodecanolide	C(CCCCCCC)C1OC(=O)CC1	198.3	Shuxin Sui et al.2024
	1087	2610-98-2	2(3H)-Furanone, 5-ethyldihydro-3-methyl-	C(C)C1CC(C(=O)O1)C	128.17	Shuxin Sui et al.2024
	1088	104-67-6	Undecan-4-olide	C(CCCCCC)C1OC(=O)CC1	184.27	Shuxin Sui et al.2024
	1089	695-06-7	4-Hexanolide	C(C)C1OC(=O)CC1	114.14	Shuxin Sui et al.2024
	1090	17092-92-1	(2,6,6-Trimethyl-2-hydroxycyclohexylidene)acetic acid lactone	C[C@@]12C(=CC(=O)O1)C(C)(C)CCC2	180.24	Shuxin Sui et al.2024
	1091	4879-95-2	beta-Isovalerolactam	CC1(C)CC(=O)N1	99.13	Shuxin Sui et al.2024
	1092	932-17-2	1-Acetyl-2-pyrrolidinone	C(=O)(C)N1C(=O)CCC1	127.14	Shuxin Sui et al.2024
	1093	616-45-5	2-Pyrrolidinone	O=C1CCCN1	85.1	Shuxin Sui et al.2024
	1094	7486-91-1	3,3-Dimethylazetidinone	CC1(C)C(=O)NC1	99.13	Shuxin Sui et al.2024
	1095	6837-24-7	N-Cyclohexyl-2-pyrrolidone	O=C1N(CCC1)C1CCCCC1	167.25	Shuxin Sui et al.2024
	1096	2556-73-2	N-Methylcaprolactam	O=C1N(C)CCCCC1	127.18	Shuxin Sui et al.2024
	1097	88-12-0	N-Vinyl-2-pyrrolidone	C(=C)N1C(=O)CCC1	111.14	Shuxin Sui et al.2024
	1098	872-50-4	1-Methyl-2-pyrrolidinone	O=C1N(C)CCC1	99.13	Shuxin Sui et al.2024
	1099	50-71-5	Alloxan	O=C1C(=O)NC(=O)NC1=O	142.07	Shuxin Sui et al.2024
	1100	1121-07-9	N-Methylsuccinimide	CN1C(=O)CCC1=O	113.11	Shuxin Sui et al.2024
	1101	123-56-8	Succinimide	O=C1NC(=O)CC1	99.09	Shuxin Sui et al.2024
	1102	170660-62-5	2,5-​Pyrrolidinedione, 3-​(dichloromethylene)​-	C(=C1CC(=O)NC1=O)(Cl)Cl	179.99	Shuxin Sui et al.2024
	1103	170660-63-6	3-Chloro-4-(dichloromethylidene)pyrrolidine-2,5-dione	C(=C1C(Cl)C(=O)NC1=O)(Cl)Cl	214.43	Shuxin Sui et al.2024
	1104	165606-93-9	2,5-Pyrrolidinedione, 3,3-dichloro-4-(dichloromethylene)-	C(=C1C(Cl)(Cl)C(=O)NC1=O)(Cl)Cl	248.9	Shuxin Sui et al.2024
	1105	85-41-6	Phthalimide	O=C1c2c(C(=O)N1)cccc2	147.13	Shuxin Sui et al.2024
	1106	28567-83-1	5-Chloro-4,6-diphenylpyrimidin-2(1H)-one	O=C2N=C(c1ccccc1)C(=C(N2)c3ccccc3)Cl	282.72	Shuxin Sui et al.2024
	1107	2034-22-2	2,4,5-Tribromoimidazole	Brc1c(Br)[nH]c(n1)Br	304.77	Shuxin Sui et al.2024
	1108	132059-52-0	2(5H)-Furanone,3-chloro-4-(dibromomethyl)-5-hydroxy-	C(Br)(Br)C1=C(Cl)C(=O)OC1O	306.33	Shuxin Sui et al.2024
	1109	122551-89-7	3-Chloro-4-dichloromethylfuran-2(5H)-one	C(Cl)(Cl)C1=C(Cl)C(=O)OC1	201.43	Shuxin Sui et al.2024
	1110	132059-51-9	4-(Bromochloromethyl)-3-chloro-5-hydroxy-2(5H)-furanone	C(Br)(Cl)C1=C(Cl)C(=O)OC1O	261.88	Shuxin Sui et al.2024
	1111	132059-53-1	2(5H)-Furanone, 3-bromo-4-(dibromomethyl)-5-hydroxy-	C(Br)(Br)C1=C(Br)C(=O)OC1O	350.79	Shuxin Sui et al.2024
	1112	766-40-5	3,4-dichloro-5-hydroxyfuran-2(5H)-one	ClC1=C(Cl)C(=O)OC1O	168.96	Shuxin Sui et al.2024
	1113	134705-35-4	3-chloro-4-methyl-5H-furan-2-one	ClC1=C(C)COC1=O	132.54	Shuxin Sui et al.2024
	1114	158347-32-1	2(5H)-​Furanone, 3,​5-​dichloro-​4-​methyl-	CC1=C(Cl)C(=O)OC1Cl	166.99	Shuxin Sui et al.2024
	1115	112309-61-2	3-chloro-5-hydroxy-4-methylfuran-2(5H)-one	CC1=C(Cl)C(=O)OC1O	148.54	Shuxin Sui et al.2024
	1116	125974-08-5	3-chloro-4-(chloromethyl)-5-hydroxyfuran-2(5H)-one	C(Cl)C1=C(Cl)C(=O)OC1O	182.99	Shuxin Sui et al.2024
	1117	154180-04-8	3-chloro-5-(dichloromethyl)-5-hydroxyfuran-2(5H)-one	C(Cl)(Cl)C1(O)C=C(C(=O)O1)Cl	217.43	Shuxin Sui et al.2024
	1118	77439-76-0	3-chloro-4-(dichloromethyl)-5-hydroxyfuran-2(5H)-one	C(Cl)(Cl)C1=C(Cl)C(=O)OC1O	217.43	Shuxin Sui et al.2024
	1119	2902-72-9	5-Hydroxy-5-(trichloromethyl)-2(5H)-furanone	C(Cl)(Cl)(Cl)C1(O)OC(=O)C=C1	217.43	Shuxin Sui et al.2024
	1120	108082-06-0	3,4-dichloro-5-(dichloromethyl)-5-hydroxyfuran-2(5H)-one	C(Cl)(Cl)C1(O)C(=C(C(=O)O1)Cl)Cl	251.9	Shuxin Sui et al.2024
	1121	154180-06-0	3-chloro-5-hydroxy-5-(trichloromethyl)furan-2(5H)-one	C(Cl)(Cl)(Cl)C1(O)C=C(C(=O)O1)Cl	251.9	Shuxin Sui et al.2024
	1122	1592-95-6	3-Bromo-9H-carbazole	Brc1cc2c3c([nH]c2cc1)cccc3	246.1	Shuxin Sui et al.2024
	1123	6825-20-3	3,6-Dibromocarbazole	Brc1cc2c3c([nH]c2cc1)ccc(c3)Br	325	Shuxin Sui et al.2024
	1124	5599-71-3	3,6-Dichlorocarbazole	Clc1cc2c3c([nH]c2cc1)ccc(c3)Cl	236.09	Shuxin Sui et al.2024
	1125	17257-80-6	1-(3-Butyloxiranyl)ethanone	C(CCC)C1C(O1)C(=O)C	142.2	Shuxin Sui et al.2024
	1126	123-91-1	1,4-Dioxane	C1COCCO1	88.11	Shuxin Sui et al.2024
	1127	17612-35-0	2,3-Epoxy-2-methylhexane	C(CC)C1C(O1)(C)C	114.19	Shuxin Sui et al.2024
	1128	2461-15-6	2-Ethylhexyl glycidyl ether	C(OCC(CCCC)CC)C1CO1	186.29	Shuxin Sui et al.2024
	1129	4468-64-8	2-Propyloxetane	C(CC)C1CCO1	100.16	Shuxin Sui et al.2024
	1130	6921-35-3	3,3-Dimethyltrimethylene oxide	CC1(C)COC1	86.13	Shuxin Sui et al.2024
	1131	17257-81-7	3,4-Epoxy-2-hexanone	C(=O)(C)C1C(O1)CC	114.14	Shuxin Sui et al.2024
	1132	6126-49-4	tetrahydro-5-methylfuran-2-methanol	C(O)C1OC(CC1)C	116.16	Shuxin Sui et al.2024
	1133	16686-11-6	1,3-Dioxolane,2-(3-chloropropyl)-	C(CCCl)C1OCCO1	150.6	Shuxin Sui et al.2024
	1134	33978-70-0	2,2-Dimethyl-5-(1-methylpropyl)tetrahydrofuran	C(CC)(C)C1OC(CC1)(C)C	156.26	Shuxin Sui et al.2024
	1135	2568-30-1	2-Chloromethyl-1,3-dioxolane	C(Cl)C1OCCO1	122.55	Shuxin Sui et al.2024
	1136	123416-83-1	2H-Pyran, 2-​[(5-​cyclopropylidenepent​yl)​oxy]​tetrahydro-	C(=C1CC1)CCCCOC1CCCCO1	210.31	Shuxin Sui et al.2024
	1137	624-57-7	2-Iodomethyloxirane	C(I)C1CO1	183.98	Shuxin Sui et al.2024
	1138	3857-17-8	2-propyltetrahydropyran	C(CC)C1CCCCO1	128.21	Shuxin Sui et al.2024
	1139	85267-96-5	Oxirane, 2-nonyl-3-octyl-, trans-	C(CCCCCCCC)[C@H]1[C@@H](O1)CCCCCCCC	282.5	Shuxin Sui et al.2024
	1140	56599-78-1	4-Ethyl-4-methyl-2-pentadecyl-1,3-dioxolane	C(CCCCCCCCCCCCCC)C1OC(CO1)(CC)C	326.6	Shuxin Sui et al.2024
	1141	53907-75-8	2-Pentyl-2-methyloxirane	C(CCCC)C1(C)CO1	128.21	Shuxin Sui et al.2024
	1142	53778-62-4	2-ethyl-3-methyl-oxetane	C(C)C1C(C)CO1	100.16	Shuxin Sui et al.2024
	1143	34723-82-5	2-(Bromomethyl)tetrahydro-2H-pyran	C(Br)C1CCCCO1	179.05	Shuxin Sui et al.2024
	1144	255-37-8	1,4-Benzodioxin	c12c(OC=CO2)cccc1	134.13	Shuxin Sui et al.2024
	1145	72744-44-6	1,3-Benzodioxole, 4-chloro-	Clc1c2c(ccc1)OCO2	156.56	Shuxin Sui et al.2024
	1146	109-07-9	2-Methylpiperazine	CC1CNCCN1	100.16	Shuxin Sui et al.2024
	1147	6154-04-7	5-Amino-2-methyl-2H-tetrazole	Nc1nn(nn1)C	99.1	Shuxin Sui et al.2024
	1148	6190-65-4	4-deethylatrazine	N(C(C)C)c1nc(Cl)nc(n1)N	187.63	Shuxin Sui et al.2024
	1149	2089238-09-3	3H-1,​2,​4-​Triazol-​5-​amine, 3-​(chloroimino)​-​N,​N-​dimethyl-​, (3E)​-	N(C)(C)C1=N/C(=N\Cl)/N=N1	159.58	Shuxin Sui et al.2024
	1150	140-79-4	1,4-Dinitrosopiperazine	N(=O)N1CCN(CC1)N=O	144.13	Shuxin Sui et al.2024
	1151	5632-47-3	1-Nitrosopiperazine	N(=O)N1CCNCC1	115.13	Shuxin Sui et al.2024
	1152	42499-41-2	1-Nitropiperazine	N(=O)(=O)N1CCNCC1	131.13	Shuxin Sui et al.2024
	1153	4164-37-8	1,4-Dinitropiperazine	N(=O)(=O)N1CCN(CC1)N(=O)=O	176.13	Shuxin Sui et al.2024
	1154	930-55-2	N-nitrosopyrrolidine	N(=O)N1CCCC1	100.12	Shuxin Sui et al.2024
	1155	100-75-4	N-nitrosopiperidine	N(=O)N1CCCCC1	114.15	Shuxin Sui et al.2024
	1156	3777-69-3	2-Pentylfuran	C(CCCC)c1ccco1	138.21	Shuxin Sui et al.2024
	1157	1917-15-3	5-Methyl-2-furoic acid	C(=O)(O)c1oc(cc1)C	126.11	Shuxin Sui et al.2024
	1158	20907-03-3	1-(2-Furyl)-2-pentanone	C(C(=O)CCC)c1ccco1	152.19	Shuxin Sui et al.2024
	1159	38199-50-7	2-Furanoctanoic acid, methyl ester	C(CCCCCCC(=O)OC)c1ccco1	224.3	Shuxin Sui et al.2024
	1160	31681-26-2	α-Propyl-2-furanacetaldehyde	C(CCC)(C=O)c1ccco1	152.19	Shuxin Sui et al.2024
	1161	64186-22-7	(E)-3-(5-iodofuran-2-yl)acrylate	C(=CC(=O)O)c1oc(cc1)I	264.02	Shuxin Sui et al.2024
	1162	4265-25-2	2-Methyl-1-benzofuran	Cc1cc2c(o1)cccc2	132.16	Shuxin Sui et al.2024
	1163	132-64-9	Dibenzofuran	c12c3c(oc1cccc2)cccc3	168.19	Shuxin Sui et al.2024
	1164	138370-63-5	5-(Hydroxymethyl)-3(2H)-furanone	C(O)C1=CC(=O)CO1	114.1	Shuxin Sui et al.2024
	1165	153343-42-1	2(5H)-​Furanone, 4-​dodecyl-​5-​ethyl-	C(CCCCCCCCCCC)C1=CC(=O)OC1CC	280.4	Shuxin Sui et al.2024
	1166	87-41-2	Phthalide	O=C1c2c(CO1)cccc2	134.13	Shuxin Sui et al.2024
	1167	7477-77-2	2(5H)-​Furanone, 5,​5-​diphenyl-	O=C1OC(C=C1)(c1ccccc1)c1ccccc1	236.26	Shuxin Sui et al.2024
	1168	17635-44-8	3,4,5-Tribromopyrazole	Brc1c(Br)n[nH]c1Br	304.77	Shuxin Sui et al.2024
	1169	92-82-0	Phenazine	c12c(nc3c(n1)cccc3)cccc2	180.2	Shuxin Sui et al.2024
	1170	2101472-60-8	5-Phenyl-5H,9H-quinoxalino[3,2,1-de]phenazine	c12n3c4c(n(c1cccc2[nH]c1c3cccc1)c1ccccc1)cccc4	347.41	Shuxin Sui et al.2024
	1171	7251-61-8	2-Methylquinoxaline	Cc1nc2c(nc1)cccc2	144.17	Shuxin Sui et al.2024
	1172	1192773-67-3	5-Chloro-5,10-dihydrophenazine	Cln1c2c([nH]c3c1cccc3)cccc2	216.67	Shuxin Sui et al.2024
	1173	855589-46-7	5,10-Dichloro-5,10-dihydrophenazine	Cln1c2c(n(c3c1cccc3)Cl)cccc2	251.11	Shuxin Sui et al.2024
	1174	1193-54-0	3,4-dichloromaleimide	ClC1=C(Cl)C(=O)NC1=O	165.96	Shuxin Sui et al.2024
	1175	1629991-95-2	1H-Pyrrole, 2,​3,​4-​tribromo-​5-​chloro-	Brc1c(Br)c([nH]c1Br)Cl	338.22	Shuxin Sui et al.2024
	1176	1629991-96-3	1H-Pyrrole, 2,​3,​4-​tribromo-​5-​iodo-	Brc1c(Br)c([nH]c1Br)I	429.67	Shuxin Sui et al.2024
	1177	96-02-6	3-chloro-2,5-furandione	ClC1=CC(=O)OC1=O	132.5	Shuxin Sui et al.2024
	1178	77124-07-3	2,3,5-tribromopyrrole	Brc1c(Br)[nH]c(c1)Br	303.78	Shuxin Sui et al.2024
	1179	1079349-88-4	Tribromopyrrole	C(=O)(OC(C)(C)C)n1c(Br)c(c(c1)Br)Br	403.89	Shuxin Sui et al.2024
	1180	54705-14-5	2,3,4,5-Tetrabromo-1H-pyrrole	Brc1c(Br)c([nH]c1Br)Br	382.67	Shuxin Sui et al.2024
	1181	1122-69-6	2-Methyl-6-ethylpyridine	C(C)c1nc(C)ccc1	121.18	Shuxin Sui et al.2024
	1182	6515-38-4	2-hydroxy-3,5,6-trichloropyridine	ClC1=CC(Cl)=C(Cl)NC1=O	198.43	Shuxin Sui et al.2024
	1183	16543-55-8	N-nitrosonornicotine	N(=O)N1[C@@H](CCC1)c1cccnc1	177.2	Shuxin Sui et al.2024
	1184	887407-16-1	N-nitrosoanatabine	N(=O)N1C(CC=CC1)c1cccnc1	189.21	Shuxin Sui et al.2024
	1185	1133-64-8	N-nitrosoanabasine	N(=O)N1[C@@H](CCCC1)c1cccnc1	191.23	Shuxin Sui et al.2024
	1186	64091-91-4	4-(methylnitrosamino)-1-(3-pyridyl)-1-butanone	C(=O)(CCCN(N=O)C)c1cccnc1	207.23	Shuxin Sui et al.2024
	1187	56-57-5	4-nitroquinoline-N-oxide	N(=O)(=O)c1c2c(n(=O)cc1)cccc2	190.16	Shuxin Sui et al.2024
2-New from HJU	1188	108-41-8	1-chloro-3-methylbenzene	CC1=CC(=CC=C1)Cl	126.58	Hechao Chen et al.2024
Number：580	1189	108-88-3	toluene	CC1=CC=CC=C1	92.14	Hechao Chen et al.2024
	1190	25735-29-9	1,1,1-trichloropropane	CCC(Cl)(Cl)Cl	147.43	Hechao Chen et al.2024
	1191	55632-13-8	1,1,1,2,2-pentachloropropane	CC(C(Cl)(Cl)Cl)(Cl)Cl	216.3	Hechao Chen et al.2024
	1192	4412-39-9	2,2-dichloroethylbenzene	C1=CC=C(C=C1)CC(Cl)Cl	175.05	Hechao Chen et al.2024
	1193	7423-93-0	(2S)-2-amino-3-(3-chloro-4-hydroxyphenyl)propanoic acid	C1=CC(=C(C=C1CC(C(=O)O)N)Cl)O	215.63	Hechao Chen et al.2024
	1194	15106-62-4	(2S)-2-amino-3-(3,5-dichloro-4-hydroxyphenyl)propanoic acid	C1=C(C=C(C(=C1Cl)O)Cl)CC(C(=O)O)N	250.08	Hechao Chen et al.2024
	1195	108-70-3	1,3,5-trichlorobenzene	C1=C(C=C(C=C1Cl)Cl)Cl	181.4	Hechao Chen et al.2024
	1196	50-43-1	2,4,6-trichlorobenzoic acid	C1=C(C=C(C(=C1Cl)C(=O)O)Cl)Cl	225.5	Hechao Chen et al.2024
	1197	14866-68-3	chlorate	[O-]Cl(=O)=O	83.45	Hechao Chen et al.2024
	1198	591-20-8	3-bromophenol	C1=CC(=CC(=C1)Br)O	173.01	Hechao Chen et al.2024
	1199	51-36-5	3,5-dichlorobenzoic acid	C1=C(C=C(C=C1Cl)Cl)C(=O)O	191.01	Hechao Chen et al.2024
	1200	118-91-2	2-chlorobenzoic acid	C1=CC=C(C(=C1)C(=O)O)Cl	156.56	Hechao Chen et al.2024
	1201	1585-40-6	benzene-1,2,3,4,5-pentacarboxylic acid	C1=C(C(=C(C(=C1C(=O)O)C(=O)O)C(=O)O)C(=O)O)C(=O)O	298.16	Hechao Chen et al.2024
	1202	19922-87-3	2,3-dichlorobutanedioic acid	C(C(C(=O)O)Cl)(C(=O)O)Cl	186.97	Hechao Chen et al.2024
	1203	2896-60-8	4-ethylbenzene-1,3-diol	CCC1=C(C=C(C=C1)O)O	138.16	Hechao Chen et al.2024
	1204	873-94-9	3,3,5-trimethylcyclohexan-1-one	CC1CC(=O)CC(C1)(C)C	140.22	Hechao Chen et al.2024
	1205	933-40-4	1,1-dimethoxycyclohexane	COC1(CCCCC1)OC	144.21	Hechao Chen et al.2024
	1206	533-18-6	(2-methylphenyl) acetate	CC1=CC=CC=C1OC(=O)C	150.17	Hechao Chen et al.2024
	1207	84-61-7	dicyclohexyl benzene-1,2-dicarboxylate	C1CCC(CC1)OC(=O)C2=CC=CC=C2C(=O)OC3CCCCC3	330.4	Hechao Chen et al.2024
	1208	100-54-9	pyridine-3-carbonitrile	C1=CC(=CN=C1)C#N	104.11	Hechao Chen et al.2024
	1209	565-69-5	2-methylpentan-3-one	CCC(=O)C(C)C	100.16	Hechao Chen et al.2024
	1210	108-87-2	methylcyclohexane	CC1CCCCC1	98.19	Hechao Chen et al.2024
	1211	4437-06-3	(E)-4-oxobut-2-enoic acid	C(=C/C(=O)O)\C=O	100.07	Hechao Chen et al.2024
	1212	3586-58-1	2-methylidenebutanoic acid	CCC(=C)C(=O)O	100.12	Hechao Chen et al.2024
	1213	32970-37-9	3,4-dimethyloxolane	CC1COCC1C	100.16	Hechao Chen et al.2024
	1214	95-47-6	1,2-xylene	CC1=CC=CC=C1C	106.16	Hechao Chen et al.2024
	1215	10166-08-2	2-(2-methylphenyl)acetaldehyde	CC1=CC=CC=C1CC=O	134.17	Hechao Chen et al.2024
	1216	4013-34-7	1-methoxyethylbenzene	CC(C1=CC=CC=C1)OC	136.19	Hechao Chen et al.2024
	1217	672-89-9	4-methoxy-6-methylpyran-2-one	CC1=CC(=CC(=O)O1)OC	140.14	Hechao Chen et al.2024
	1218	2550-26-7	4-phenylbutan-2-one	CC(=O)CCC1=CC=CC=C1	148.2	Hechao Chen et al.2024
	1219	499-06-9	3,5-dimethylbenzoic acid	CC1=CC(=CC(=C1)C(=O)O)C	150.17	Hechao Chen et al.2024
	1220	4419-57-2	1-pyrrolidin-1-ylpentan-1-one	CCCCC(=O)N1CCCC1	155.24	Hechao Chen et al.2024
	1221	498-21-5	2-methylbutanedioic acid	CC(CC(=O)O)C(=O)O	132.11	Hechao Chen et al.2024
	1222	22927-13-5	2-ethylbenzaldehyde	CCC1=CC=CC=C1C=O	134.17	Hechao Chen et al.2024
	1223	463-77-4	carbamic acid	C(=O)(N)O	61.04	Hechao Chen et al.2024
	1224	4743-82-2	(E)-4-oxopent-2-enoic acid	CC(=O)C=CC(=O)O	114.1	Hechao Chen et al.2024
	1225	120-80-9	benzene-1,2-diol	C1=CC=C(C(=C1)O)O	110.11	Hechao Chen et al.2024
	1226	498-23-7	(Z)-2-methylbut-2-enedioic acid	CC(=CC(=O)O)C(=O)O	130.1	Hechao Chen et al.2024
	1227	123-31-9	benzene-1,4-diol	C1=CC(=CC=C1O)O	110.11	Hechao Chen et al.2024
	1228	14998-27-7	chlorite	[O-]Cl=O	67.45	Hechao Chen et al.2024
	1229	56857-23-9	2,2-dichloropropanedioic acid	C(=O)(C(C(=O)O)(Cl)Cl)O	172.95	Hechao Chen et al.2024
	1230	18240-68-1	2,2-dichloropentanoic acid	CCCC(C(=O)O)(Cl)Cl	171.02	Hechao Chen et al.2024
	1231	506-30-9	icosanoic acid	CCCCCCCCCCCCCCCCCCCC(=O)O	312.5	Hechao Chen et al.2024
	1232	112-85-6	docosanoic acid	CCCCCCCCCCCCCCCCCCCCCC(=O)O	340.6	Hechao Chen et al.2024
	1233	2433-96-7	tricosanoic acid	CCCCCCCCCCCCCCCCCCCCCCC(=O)O	354.6	Hechao Chen et al.2024
	1234	506-38-7	pentacosanoic acid	CCCCCCCCCCCCCCCCCCCCCCCCC(=O)O	382.7	Hechao Chen et al.2024
	1235	506-46-7	hexacosanoic acid	CCCCCCCCCCCCCCCCCCCCCCCCCC(=O)O	396.7	Hechao Chen et al.2024
	1236	15541-45-4	bromate	[O-]Br(=O)=O	127.9	Hechao Chen et al.2024
	1237	595-46-0	2,2-dimethylpropanedioic acid	CC(C)(C(=O)O)C(=O)O	132.11	Hechao Chen et al.2024
	1238	617-43-6	(E)-2-chlorobut-2-enedioic acid	C(=C(C(=O)O)Cl)C(=O)O	150.52	Hechao Chen et al.2024
	1239	7722-84-1	hydrogen peroxide	OO	34.015	Hechao Chen et al.2024
	1240	119-67-5	2-formylbenzoic acid	C1=CC=C(C(=C1)C=O)C(=O)O	150.13	Hechao Chen et al.2024
	1241	3958-03-0	2,3,4,5-tetrabromothiophene	C1(=C(SC(=C1Br)Br)Br)Br	399.73	Hechao Chen et al.2024
	1242	30957-55-2	1,1-dibromo-1-chloropropan-2-one	CC(=O)C(Cl)(Br)Br	250.31	Hechao Chen et al.2024
	1243	6012-97-1	2,3,4,5-tetrachlorothiophene	C1(=C(SC(=C1Cl)Cl)Cl)Cl	221.9	Hechao Chen et al.2024
	1244	1600-37-9	1,1,2,3,3-pentachloroprop-1-ene	C(C(=C(Cl)Cl)Cl)(Cl)Cl	214.3	Hechao Chen et al.2024
	1245	2648-51-3	3,3-dichloroprop-2-enal	C(=C(Cl)Cl)C=O	124.95	Hechao Chen et al.2024
	1246	15347-86-1	1,1,1,4,4-pentachlorobut-3-en-2-one	C(=C(Cl)Cl)C(=O)C(Cl)(Cl)Cl	242.3	Hechao Chen et al.2024
	1247	16051-87-9	3-cyanopropanoic acid	C(CC(=O)O)C#N	99.09	Hechao Chen et al.2024
	1248	39201-33-7	4-cyanobutanoic acid	C(CC#N)CC(=O)O	113.11	Hechao Chen et al.2024
	1249	120-72-9	1H-indole	C1=CC=C2C(=C1)C=CN2	117.15	Hechao Chen et al.2024
	1250	4170-24-5	2-chlorobutanoic acid	CCC(C(=O)O)Cl	122.55	Hechao Chen et al.2024
	1251	6155-96-0	2-chloropentanoic acid	CCCC(C(=O)O)Cl	136.58	Hechao Chen et al.2024
	1252	3533-69-5	methyl (Z)-2,3-dichloroprop-2-enoate	COC(=O)C(=CCl)Cl	154.98	Hechao Chen et al.2024
	1253	29671-30-5	2-chlorohexanoic acid	CCCCC(C(=O)O)Cl	150.6	Hechao Chen et al.2024
	1254	20563-94-4	2-chloroheptanoic acid	CCCCCC(C(=O)O)Cl	164.63	Hechao Chen et al.2024
	1255	1878-66-6	2-(4-chlorophenyl)acetic acid	C1=CC(=CC=C1CC(=O)O)Cl	170.59	Hechao Chen et al.2024
	1256	938165-29-8	2,4-dichloro-3-hydroxybutanoic acid	C(C(C(C(=O)O)Cl)O)Cl	172.99	Hechao Chen et al.2024
	1257	18240-70-5	2,2-dichlorohexanoic acid	CCCCC(C(=O)O)(Cl)Cl	185.05	Hechao Chen et al.2024
	1258	5077-74-7	6,6-dichlorohexanoic acid	C(CCC(=O)O)CC(Cl)Cl	185.05	Hechao Chen et al.2024
	1259	16714-79-7	2-chloroheptanedioic acid	C(CCC(=O)O)CC(C(=O)O)Cl	194.61	Hechao Chen et al.2024
	1260	50901-13-8	2,2-dichloropentanedioic acid	C(CC(C(=O)O)(Cl)Cl)C(=O)O	201	Hechao Chen et al.2024
	1261	6575-24-2	2-(2,6-dichlorophenyl)acetic acid	C1=CC(=C(C(=C1)Cl)CC(=O)O)Cl	205.03	Hechao Chen et al.2024
	1262	13159-46-1	4,4,4-trichloro-3-hydroxybutanoic acid	C(C(C(Cl)(Cl)Cl)O)C(=O)O	207.43	Hechao Chen et al.2024
	1263	24479-92-3	2-chlorooctanedioic acid	C(CCC(C(=O)O)Cl)CCC(=O)O	208.64	Hechao Chen et al.2024
	1264	90722-61-5	2-chlorononanedioic acid	C(CCCC(=O)O)CCC(C(=O)O)Cl	222.66	Hechao Chen et al.2024
	1265	31001-00-0	2,2-dichlorooctanedioic acid	C(CCC(=O)O)CCC(C(=O)O)(Cl)Cl	243.08	Hechao Chen et al.2024
	1266	101205-10-1	3,3,5,5,5-pentachloro-4-hydroxypentanoic acid	C(C(=O)O)C(C(C(Cl)(Cl)Cl)O)(Cl)Cl	290.3	Hechao Chen et al.2024
	1267	646-30-0	nonadecanoic acid	CCCCCCCCCCCCCCCCCCC(=O)O	298.5	Hechao Chen et al.2024
	1268	101205-11-2	2,3,3,5,5,5-hexachloro-4-hydroxypentanoic acid	C(C(=O)O)(C(C(C(Cl)(Cl)Cl)O)(Cl)Cl)Cl	324.8	Hechao Chen et al.2024
	1269	7138-40-1	heptacosanoic acid	CCCCCCCCCCCCCCCCCCCCCCCCCCC(=O)O	410.7	Hechao Chen et al.2024
	1270	506-48-9	octacosanoic acid	CCCCCCCCCCCCCCCCCCCCCCCCCCCC(=O)O	424.7	Hechao Chen et al.2024
	1271	3083-23-6	2-(trichloromethyl)oxirane	C1C(O1)C(Cl)(Cl)Cl	161.41	Hechao Chen et al.2024
	1272	74-11-3	4-chlorobenzoic acid	C1=CC(=CC=C1C(=O)O)Cl	156.56	Hechao Chen et al.2024
	1273	617-42-5	(Z)-2-chlorobut-2-enedioic acid	C(=C(C(=O)O)Cl)C(=O)O	150.52	Hechao Chen et al.2024
	1274	544-10-5	1-chlorohexane	CCCCCCCl	120.62	Hechao Chen et al.2024
	1275	22230-93-9	(Z)-4,4,4-trichlorobut-2-enoic acid	C(=CC(Cl)(Cl)Cl)C(=O)O	189.42	Hechao Chen et al.2024
	1276	512-56-1	trimethyl phosphate	COP(=O)(OC)OC	140.07	Hechao Chen et al.2024
	1277	857816-26-3	2,2-dichloro-3-hydroxypropanoic acid	C(C(C(=O)O)(Cl)Cl)O	158.96	Hechao Chen et al.2024
	1278	89283-14-7	3,4,5-trichlorocyclopent-3-ene-1,2-dione	C1(C(=C(C(=O)C1=O)Cl)Cl)Cl	199.41	Hechao Chen et al.2024
	1279	25476-89-5	1-chlorobut-3-en-2-one	C=CC(=O)CCl	104.53	Hechao Chen et al.2024
	1280	99-14-9	propane-1,2,3-tricarboxylic acid	C(C(CC(=O)O)C(=O)O)C(=O)O	176.12	Hechao Chen et al.2024
	1281	612-19-1	2-ethylbenzoic acid	CCC1=CC=CC=C1C(=O)O	150.17	Hechao Chen et al.2024
	1282	498-02-2	1-(4-hydroxy-3-methoxyphenyl)ethanone	CC(=O)C1=CC(=C(C=C1)O)OC	166.17	Hechao Chen et al.2024
	1283	544-76-3	hexadecane	CCCCCCCCCCCCCCCC	226.44	Hechao Chen et al.2024
	1284	629-78-7	heptadecane	CCCCCCCCCCCCCCCCC	240.5	Hechao Chen et al.2024
	1285	112-95-8	icosane	CCCCCCCCCCCCCCCCCCCC	282.5	Hechao Chen et al.2024
	1286	629-97-0	docosane	CCCCCCCCCCCCCCCCCCCCCC	310.6	Hechao Chen et al.2024
	1287	638-67-5	tricosane	CCCCCCCCCCCCCCCCCCCCCCC	324.6	Hechao Chen et al.2024
	1288	646-31-1	tetracosane	CCCCCCCCCCCCCCCCCCCCCCCC	338.7	Hechao Chen et al.2024
	1289	629-99-2	pentacosane	CCCCCCCCCCCCCCCCCCCCCCCCC	352.7	Hechao Chen et al.2024
	1290	630-01-3	hexacosane	CCCCCCCCCCCCCCCCCCCCCCCCCC	366.7	Hechao Chen et al.2024
	1291	593-49-7	heptacosane	CCCCCCCCCCCCCCCCCCCCCCCCCCC	380.7	Hechao Chen et al.2024
	1292	630-02-4	octacosane	CCCCCCCCCCCCCCCCCCCCCCCCCCCC	394.8	Hechao Chen et al.2024
	1293	630-03-5	nonacosane	CCCCCCCCCCCCCCCCCCCCCCCCCCCCC	408.8	Hechao Chen et al.2024
	1294	638-68-6	triacontane	CCCCCCCCCCCCCCCCCCCCCCCCCCCCCC	422.8	Hechao Chen et al.2024
	1295	610-02-6	2,3,4-trihydroxybenzoic acid	C1=CC(=C(C(=C1C(=O)O)O)O)O	170.12	Hechao Chen et al.2024
	1296	10171-38-7	ethoxymethanol	CCOCO	76.09	Hechao Chen et al.2024
	1297	586-38-9	3-methoxybenzoic acid	COC1=CC=CC(=C1)C(=O)O	152.15	Hechao Chen et al.2024
	1298	10471-14-4	1-ethoxy-1-methoxyethane	CCOC(C)OC	104.15	Hechao Chen et al.2024
	1299	49827-44-3	dimethyl 2,2-dimethylbutanedioate	CC(C)(CC(=O)OC)C(=O)OC	174.19	Hechao Chen et al.2024
	1300	111-82-0	methyl dodecanoate	CCCCCCCCCCCC(=O)OC	214.34	Hechao Chen et al.2024
	1301	3621-79-2	2-methylidenepentanedioic acid	C=C(CCC(=O)O)C(=O)O	144.12	Hechao Chen et al.2024
	1302	93-07-2	3,4-dimethoxybenzoic acid	COC1=C(C=C(C=C1)C(=O)O)OC	182.17	Hechao Chen et al.2024
	1303	541-05-9	2,2,4,4,6,6-hexamethyl-1,3,5,2,4,6-trioxatrisilinane	C[Si]1(O[Si](O[Si](O1)(C)C)(C)C)C	222.46	Hechao Chen et al.2024
	1304	76-93-7	2-hydroxy-2,2-diphenylacetic acid	C1=CC=C(C=C1)C(C2=CC=CC=C2)(C(=O)O)O	228.24	Hechao Chen et al.2024
	1305	117823-31-1	(Z)-2,4,4-trichloro-3-formylbut-2-enoic acid	C(=O)C(=C(C(=O)O)Cl)C(Cl)Cl	217.43	Hechao Chen et al.2024
	1306	15873-56-0	2-chloroethane-1,1-diol	C(C(O)O)Cl	96.51	Hechao Chen et al.2024
	1307	16721-81-6	1,2-bis(chloromethoxy)propane	CC(COCCl)OCCl	173.03	Hechao Chen et al.2024
	1308	856182-21-3	2,3,4-trichlorobut-2-enoic acid	C(C(=C(C(=O)O)Cl)Cl)Cl	189.42	Hechao Chen et al.2024
	1309	2588-77-4	3-bromo-2-methylbutan-2-ol	CC(C(C)(C)O)Br	167.04	Hechao Chen et al.2024
	1310	32821-75-3	2-methoxyprop-2-enoic acid	COC(=C)C(=O)O	102.09	Hechao Chen et al.2024
	1311	594-61-6	2-hydroxy-2-methylpropanoic acid	CC(C)(C(=O)O)O	104.1	Hechao Chen et al.2024
	1312	516-05-2	2-methylpropanedioic acid	CC(C(=O)O)C(=O)O	118.09	Hechao Chen et al.2024
	1313	6915-15-7	2-hydroxybutanedioic acid	C(C(C(=O)O)O)C(=O)O	134.09	Hechao Chen et al.2024
	1314	37557-96-3	dichloro(methylsulfonyl)methane	CS(=O)(=O)C(Cl)Cl	163.02	Hechao Chen et al.2024
	1315	107-02-8	prop-2-enal	C=CC=O	56.06	Hechao Chen et al.2024
	1316	2134-29-4	3-hydroxypropanal	C(CO)C=O	74.08	Hechao Chen et al.2024
	1317	692-29-5	4-oxobutanoic acid	C(CC(=O)O)C=O	102.09	Hechao Chen et al.2024
	1318	10436-39-2	1,1,2,3-tetrachloroprop-1-ene	C(C(=C(Cl)Cl)Cl)Cl	179.9	Hechao Chen et al.2024
	1319	63099-66-1	1,1,2,3-tetrachlorobut-1-ene	CC(C(=C(Cl)Cl)Cl)Cl	193.9	Hechao Chen et al.2024
	1320	21400-41-9	1,1,2,4,4-pentachlorobuta-1,3-diene	C(=C(Cl)Cl)C(=C(Cl)Cl)Cl	226.3	Hechao Chen et al.2024
	1321	926-61-4	3-oxopropanoic acid	C(C=O)C(=O)O	88.06	Hechao Chen et al.2024
	1322	111-30-8	pentanedial	C(CC=O)CC=O	100.12	Hechao Chen et al.2024
	1323	38254-49-8	1-bromo-2-methylpropan-2-ol	CC(C)(CBr)O	153.02	Hechao Chen et al.2024
	1324	74305-04-7	2-bromocyclopentan-1-ol	C1CC(C(C1)Br)O	165.03	Hechao Chen et al.2024
	1325	31736-62-6	1-bromo-2-methylbutan-2-ol	CCC(C)(CBr)O	167.04	Hechao Chen et al.2024
	1326	159572-83-5	(2R,3R)-2-bromopentan-3-ol	CCC(C(C)Br)O	167.04	Hechao Chen et al.2024
	1327	159475-11-3	(2R,3R)-3-bromopentan-2-ol	CCC(C(C)O)Br	167.04	Hechao Chen et al.2024
	1328	91198-48-0	3,4-dibromopent-1-ene	CC(C(C=C)Br)Br	227.92	Hechao Chen et al.2024
	1329	42474-20-4	1,3-dibromopentane	CCC(CCBr)Br	229.94	Hechao Chen et al.2024
	1330	5398-25-4	2,3-dibromopentane	CCC(C(C)Br)Br	229.94	Hechao Chen et al.2024
	1331	159475-14-6	(2S,3R)-1,2-dibromopentan-3-ol	CCC(C(CBr)Br)O	245.94	Hechao Chen et al.2024
	1332	159475-13-5	(2S,3S)-1,2-dibromopentan-3-ol	CCC(C(CBr)Br)O	245.94	Hechao Chen et al.2024
	1333	159475-15-7	(3S,4S)-1,4-dibromopentan-3-ol	CC(C(CCBr)O)Br	245.94	Hechao Chen et al.2024
	1334	159475-17-9	(2S,3S)-3,5-dibromopentan-2-ol	CC(C(CCBr)Br)O	245.94	Hechao Chen et al.2024
	1335	5912-58-3	1-chloroethyl acetate	CC(OC(=O)C)Cl	122.55	Hechao Chen et al.2024
	1336	54411-21-1	1-(2-chloroethyl)-3,5-dimethylbenzene	CC1=CC(=CC(=C1)CCCl)C	168.66	Hechao Chen et al.2024
	1337	147672-80-8	3-hydroxyprop-2-enoic acid	C(=CO)C(=O)O	88.06	Hechao Chen et al.2024
	1338	50-21-5	2-hydroxypropanoic acid	CC(C(=O)O)O	90.08	Hechao Chen et al.2024
	1339	503-66-2	3-hydroxypropanoic acid	C(CO)C(=O)O	90.08	Hechao Chen et al.2024
	1340	89-86-1	2,4-dihydroxybenzoic acid	C1=CC(=C(C=C1O)O)C(=O)O	154.12	Hechao Chen et al.2024
	1341	121-34-6	4-hydroxy-3-methoxybenzoic acid	COC1=C(C=CC(=C1)C(=O)O)O	168.15	Hechao Chen et al.2024
	1342	112-79-8	(E)-octadec-9-enoic acid	CCCCCCCCC=CCCCCCCCC(=O)O	282.5	Hechao Chen et al.2024
	1343	97-65-4	2-methylidenebutanedioic acid	C=C(CC(=O)O)C(=O)O	130.1	Hechao Chen et al.2024
	1344	99-96-7	4-hydroxybenzoic acid	C1=CC(=CC=C1C(=O)O)O	138.12	Hechao Chen et al.2024
	1345	123-08-0	4-hydroxybenzaldehyde	C1=CC(=CC=C1C=O)O	122.12	Hechao Chen et al.2024
	1346	108683-62-1	2-(chloromethyl)benzaldehyde	C1=CC=C(C(=C1)CCl)C=O	154.59	Hechao Chen et al.2024
	1347	58170-31-3	4,5-dibromo-2,3-dimethylphenol	CC1=C(C(=C(C=C1O)Br)Br)C	279.96	Hechao Chen et al.2024
	1348	114434-99-0	4,5-dichlorooxolan-2-one	C1C(C(OC1=O)Cl)Cl	154.98	Hechao Chen et al.2024
	1349	15454-31-6	iodate	[O-]I(=O)=O	174.903	Hechao Chen et al.2024
	1350	14010-45-8	3,4-dichloro-2-hydroxybenzoic acid	C1=CC(=C(C(=C1C(=O)O)O)Cl)Cl	207.01	Hechao Chen et al.2024
	1351	27072-47-5	1,1-dibromopropane	CCC(Br)Br	201.89	Hechao Chen et al.2024
	1352	121-33-5	4-hydroxy-3-methoxybenzaldehyde	COC1=C(C=CC(=C1)C=O)O	152.15	Hechao Chen et al.2024
	1353	2553-17-5	9-oxononanoic acid	C(CCCC=O)CCCC(=O)O	172.22	Hechao Chen et al.2024
	1354	505-03-3	5-oxohexanal	CC(=O)CCCC=O	114.14	Hechao Chen et al.2024
	1355	10140-87-1	1,2-dichloroethyl acetate	CC(=O)OC(CCl)Cl	156.99	Hechao Chen et al.2024
	1356	107-81-3	2-bromopentane	CCCC(C)Br	151.04	Hechao Chen et al.2024
	1357	110-41-8	2-methylundecanal	CCCCCCCCCC(C)C=O	184.32	Hechao Chen et al.2024
	1358	107-07-3	2-chloroethanol	C(CCl)O	80.51	Hechao Chen et al.2024
	1359	2363-83-9	(E)-but-2-enedial	C(=CC=O)C=O	84.07	Hechao Chen et al.2024
	1360	30801-96-8	(E)-3-methylhex-2-en-1-ol	CCCC(=CCO)C	114.19	Hechao Chen et al.2024
	1361	617-62-9	2-methylpentanedioic acid	CC(CCC(=O)O)C(=O)O	146.14	Hechao Chen et al.2024
	1362	28832-55-5	2-chlorobutanal	CCC(C=O)Cl	106.55	Hechao Chen et al.2024
	1363	1073-67-2	1-chloro-4-ethenylbenzene	C=CC1=CC=C(C=C1)Cl	138.59	Hechao Chen et al.2024
	1364	576-23-8	1-bromo-2,3-dimethylbenzene	CC1=C(C(=CC=C1)Br)C	185.06	Hechao Chen et al.2024
	1365	40101-33-5	1-bromo-2,3,4-trimethylbenzene	CC1=C(C(=C(C=C1)Br)C)C	199.09	Hechao Chen et al.2024
	1366	22802-37-5	4-bromo-2,3-dimethylphenol	CC1=C(C=CC(=C1C)Br)O	201.06	Hechao Chen et al.2024
	1367	652977-95-2	2-bromo-1,2-dihydronaphthalene	C1C(C=CC2=CC=CC=C21)Br	209.08	Hechao Chen et al.2024
	1368	54753-94-5	2-bromo-1,2,3,4-tetrahydronaphthalene	C1CC2=CC=CC=C2CC1Br	211.1	Hechao Chen et al.2024
	1369	425394-71-4	1-bromo-4-chloro-2,3-dimethylbenzene	CC1=C(C=CC(=C1C)Br)Cl	219.5	Hechao Chen et al.2024
	1370	652977-98-5	2-bromo-3-methyl-1,2,3,4-tetrahydronaphthalene	CC1CC2=CC=CC=C2CC1Br	225.12	Hechao Chen et al.2024
	1371	652977-99-6	6-bromo-5,6,7,8-tetrahydronaphthalen-1-ol	C1CC2=C(CC1Br)C=CC=C2O	227.1	Hechao Chen et al.2024
	1372	652977-96-3	4-(bromomethyl)-2,3,6-trimethylphenol	CC1=CC(=C(C(=C1O)C)C)CBr	229.11	Hechao Chen et al.2024
	1373	652977-97-4	1-(bromomethyl)-3-(2-chloroethyl)-5-methylbenzene	CC1=CC(=CC(=C1)CBr)CCCl	247.56	Hechao Chen et al.2024
	1374	2018-87-3	2,3-dibromo-1,2,3,4-tetrahydronaphthalene	C1C(C(CC2=CC=CC=C21)Br)Br	289.99	Hechao Chen et al.2024
	1375	1646-54-4	1,4-dibromo-2,3,5,6-tetramethylbenzene	CC1=C(C(=C(C(=C1Br)C)C)Br)C	292.01	Hechao Chen et al.2024
	1376	55133-10-3	3,4,5-tribromo-2,6-dimethylphenol	CC1=C(C(=C(C(=C1Br)Br)Br)C)O	358.85	Hechao Chen et al.2024
	1377	1074-11-9	1,2-dichloroethylbenzene	C1=CC=C(C=C1)C(CCl)Cl	175.05	Hechao Chen et al.2024
	1378	5593-85-1	3,4,4-trichlorobut-3-enoic acid	C(C(=C(Cl)Cl)Cl)C(=O)O	189.42	Hechao Chen et al.2024
	1379	22332-94-1	5-bromo-1,2,3,4,5-pentachlorocyclopenta-1,3-diene	C1(=C(C(C(=C1Cl)Cl)(Cl)Br)Cl)Cl	317.2	Hechao Chen et al.2024
	1380	111405-15-3	1,1,2,2-tetrabromo-1-chloroethane	C(C(Cl)(Br)Br)(Br)Br	380.1	Hechao Chen et al.2024
	1381	59110-15-5	2,3-dibromobut-2-enoic acid	CC(=C(C(=O)O)Br)Br	243.88	Hechao Chen et al.2024
	1382	576-24-9	2,3-dichlorophenol	C1=CC(=C(C(=C1)Cl)Cl)O	163	Hechao Chen et al.2024
	1383	149230-81-9	(E)-2,3-dibromobut-2-enedioic acid	C(=C(C(=O)O)Br)(C(=O)O)Br	273.86	Hechao Chen et al.2024
	1384	168295-33-8	(2E,4E)-5-bromopenta-2,4-dienal	C(=CC=O)C=CBr	161	Hechao Chen et al.2024
	1385	927-68-4	2-bromoethyl acetate	CC(=O)OCCBr	167	Hechao Chen et al.2024
	1386	14396-65-7	1,4-dibromobutane-2,3-diol	C(C(C(CBr)O)O)Br	247.91	Hechao Chen et al.2024
	1387	6308-13-0	2,3-dibromopropyl acetate	CC(=O)OCC(CBr)Br	259.92	Hechao Chen et al.2024
	1388	609-85-8	2-amino-3,5-dibromobenzoic acid	C1=C(C=C(C(=C1C(=O)O)N)Br)Br	294.93	Hechao Chen et al.2024
	1389	93146-89-5	2,2-dibromobutanoic acid	CCC(C(=O)O)(Br)Br	245.9	Hechao Chen et al.2024
	1390	816-39-7	1,3-dibromopropan-2-one	C(C(=O)CBr)Br	215.87	Hechao Chen et al.2024
	1391	3141-25-1	2,3,4-tribromothiophene	C1=C(C(=C(S1)Br)Br)Br	320.83	Hechao Chen et al.2024
	1392	38094-11-0	tributyl propane-1,2,3-tricarboxylate	CCCCOC(=O)CC(CC(=O)OCCCC)C(=O)OCCCC	344.4	Hechao Chen et al.2024
	1393	79-34-5	1,1,2,2-tetrachloroethane	C(C(Cl)Cl)(Cl)Cl	167.8	Hechao Chen et al.2024
	1394	78-40-0	triethyl phosphate	CCOP(=O)(OCC)OCC	182.15	Hechao Chen et al.2024
	1395	623-48-3	ethyl 2-iodoacetate	CCOC(=O)CI	214	Hechao Chen et al.2024
	1396	6372-02-7	(E)-3-iodoprop-2-enoic acid	C(=C/I)\C(=O)O	197.96	Hechao Chen et al.2024
	1397	141-76-4	3-iodopropanoic acid	C(CI)C(=O)O	199.97	Hechao Chen et al.2024
	1398	1806310-25-7	6-hydroxy-2,3-diiodobenzoic acid	C1=CC(=C(C(=C1O)C(=O)O)I)I	389.91	Hechao Chen et al.2024
	1399	33522-84-8	2,4-diiodobenzoic acid	C1=CC(=C(C=C1I)I)C(=O)O	373.91	Hechao Chen et al.2024
	1400	111830-28-5	2-bromo-4-hydroxybutanoic acid	C(CO)C(C(=O)O)Br	183	Hechao Chen et al.2024
	1401	201281-81-4	2-bromoethene-1,1,2-tricarboxylic acid	C(=C(C(=O)O)Br)(C(=O)O)C(=O)O	238.98	Hechao Chen et al.2024
	1402	619-58-9	4-iodobenzoic acid	C1=CC(=CC=C1C(=O)O)I	248.02	Hechao Chen et al.2024
	1403	5029-68-5	(Z)-2-iodobut-2-enedioic acid	C(=C(C(=O)O)I)C(=O)O	241.97	Hechao Chen et al.2024
	1404	80-69-3	2-hydroxypropanedioic acid	C(C(=O)O)(C(=O)O)O	120.06	Hechao Chen et al.2024
	1405	90-02-8	2-hydroxybenzaldehyde	C1=CC=C(C(=C1)C=O)O	122.12	Hechao Chen et al.2024
	1406	4755-72-0	2-chloro-2-phenylacetic acid	C1=CC=C(C=C1)C(C(=O)O)Cl	170.59	Hechao Chen et al.2024
	1407	634-67-3	2,3,4-trichloroaniline	C1=CC(=C(C(=C1N)Cl)Cl)Cl	196.5	Hechao Chen et al.2024
	1408	6213-89-4	(E)-3-bromoprop-2-enoic acid	C(=CBr)C(=O)O	150.96	Hechao Chen et al.2024
	1409	608-37-7	(Z)-2,3-dibromobut-2-enedioic acid	C(=C(C(=O)O)Br)(C(=O)O)Br	273.86	Hechao Chen et al.2024
	1410	6751-75-3	2-bromobenzene-1,3-diol	C1=CC(=C(C(=C1)O)Br)O	189.01	Hechao Chen et al.2024
	1411	22802-39-7	2-bromo-4,5-dimethylphenol	CC1=CC(=C(C=C1C)Br)O	201.06	Hechao Chen et al.2024
	1412	16750-67-7	4-amino-2-bromophenol	C1=CC(=C(C=C1N)Br)O	188.02	Hechao Chen et al.2024
	1413	3333-25-3	2,6-dibromobenzene-1,4-diol	C1=C(C=C(C(=C1Br)O)Br)O	267.9	Hechao Chen et al.2024
	1414	600-33-9	2-chloropropanedioic acid	C(C(=O)O)(C(=O)O)Cl	138.5	Hechao Chen et al.2024
	1415	4236-43-5	5,5,5-trichloropentanoic acid	C(CC(=O)O)CC(Cl)(Cl)Cl	205.46	Hechao Chen et al.2024
	1416	871-70-5	octadecanedioic acid	C(CCCCCCCCC(=O)O)CCCCCCCC(=O)O	314.5	Hechao Chen et al.2024
	1417	30515-28-7	7-bromoheptanoic acid	C(CCCBr)CCC(=O)O	209.08	Hechao Chen et al.2024
	1418	86006-42-0	3,5-dibromo-4-methylphenol	CC1=C(C=C(C=C1Br)O)Br	265.93	Hechao Chen et al.2024
	1419	108-42-9	3-chloroaniline	C1=CC(=CC(=C1)Cl)N	127.57	Hechao Chen et al.2024
	1420	106-47-8	4-chloroaniline	C1=CC(=CC=C1N)Cl	127.57	Hechao Chen et al.2024
	1421	88-74-4	2-nitroaniline	C1=CC=C(C(=C1)N)[N+](=O)[O-]	138.12	Hechao Chen et al.2024
	1422	95-76-1	3,4-dichloroaniline	C1=CC(=C(C=C1N)Cl)Cl	162.01	Hechao Chen et al.2024
	1423	634-93-5	2,4,6-trichloroaniline	C1=C(C=C(C(=C1Cl)N)Cl)Cl	196.5	Hechao Chen et al.2024
	1424	634-91-3	3,4,5-trichloroaniline	C1=C(C=C(C(=C1Cl)Cl)Cl)N	196.5	Hechao Chen et al.2024
	1425	43068-92-4	4-chloro-1,5-dimethyl-2-phenylpyrazol-3-one	CC1=C(C(=O)N(N1C)C2=CC=CC=C2)Cl	222.67	Hechao Chen et al.2024
	1426	69624-12-0	2,3,4-tribromo-1H-pyrrole	C1=C(C(=C(N1)Br)Br)Br	303.78	Hechao Chen et al.2024
	1427	859923-95-8	2-chloro-3,4,5-trihydroxybenzoic acid	C1=C(C(=C(C(=C1O)O)O)Cl)C(=O)O	204.56	Hechao Chen et al.2024
	1428	86004-47-9	2,6-dichloro-3,4,5-trihydroxybenzoic acid	C1(=C(C(=C(C(=C1Cl)O)O)O)Cl)C(=O)O	239.01	Hechao Chen et al.2024
	1429	80508-23-2	3-(1-nitrosopyrrolidin-2-yl)pyridine	C1CC(N(C1)N=O)C2=CN=CC=C2	177.2	Hechao Chen et al.2024
	1430	76014-81-8	N-(4-hydroxy-4-pyridin-3-ylbutyl)-N-methylnitrous amide	CN(CCCC(C1=CN=CC=C1)O)N=O	209.24	Hechao Chen et al.2024
	1431	38972-02-0	2,6-dibromo-4-(3-hydroxypropyl)phenol	C1=C(C=C(C(=C1Br)O)Br)CCCO	309.98	Hechao Chen et al.2024
	1432	3883-95-2	3-bromo-2-hydroxybenzoic acid	C1=CC(=C(C(=C1)Br)O)C(=O)O	217.02	Hechao Chen et al.2024
	1433	2200-85-3	5-bromo-3-chloro-2-hydroxybenzoic acid	C1=C(C=C(C(=C1C(=O)O)O)Cl)Br	251.46	Hechao Chen et al.2024
	1434	625-40-1	(E)-3-chloroprop-2-enoic acid	C(=CCl)C(=O)O	106.51	Hechao Chen et al.2024
	1435	923-06-8	2-bromobutanedioic acid	C(C(C(=O)O)Br)C(=O)O	196.98	Hechao Chen et al.2024
	1436	149261-48-3	(Z)-2-(dichloromethyl)but-2-enedioic acid	C(=C(C(Cl)Cl)C(=O)O)C(=O)O	198.99	Hechao Chen et al.2024
	1437	593-66-8	iodoethene	C=CI	153.95	Hechao Chen et al.2024
	1438	38169-97-0	2-hydroxy-6-iodobenzaldehyde	C1=CC(=C(C(=C1)I)C=O)O	248.02	Hechao Chen et al.2024
	1439	89677-81-6	2-hydroxy-6-iodobenzoic acid	C1=CC(=C(C(=C1)I)C(=O)O)O	264.02	Hechao Chen et al.2024
	1440	1638365-46-4	2,6-dichloro-3,5-dihydroxybenzoic acid	C1=C(C(=C(C(=C1O)Cl)C(=O)O)Cl)O	223.01	Hechao Chen et al.2024
	1441	3861-58-3	4-hydroxy-3-iodo-5-nitrobenzaldehyde	C1=C(C=C(C(=C1[N+](=O)[O-])O)I)C=O	293.02	Hechao Chen et al.2024
	1442	6225-10-1	N-methylpentanamide	CCCCC(=O)NC	115.17	Hechao Chen et al.2024
	1443	58653-97-7	methyl 2-methyloxirane-2-carboxylate	CC1(CO1)C(=O)OC	116.11	Hechao Chen et al.2024
	1444	19020-62-3	dimethyl 2-hydroxy-2-methylbutanedioate	CC(CC(=O)OC)(C(=O)OC)O	176.17	Hechao Chen et al.2024
	1445	39557-22-7	undecane-3,6-dione	CCCCCC(=O)CCC(=O)CC	184.27	Hechao Chen et al.2024
	1446	74663-71-1	3-cyclohexylbutan-2-ylcyclohexane	CC(C1CCCCC1)C(C)C2CCCCC2	222.41	Hechao Chen et al.2024
	1447	959067-92-6	1-O-hexyl 2-O-(2-methylpropyl) oxalate	CCCCCCOC(=O)C(=O)OCC(C)C	230.3	Hechao Chen et al.2024
	1448	921600-09-1	2-ethyl-2-methyltridecan-1-ol	CCCCCCCCCCCC(C)(CC)CO	242.44	Hechao Chen et al.2024
	1449	600-31-7	2-bromopropanedioic acid	C(C(=O)O)(C(=O)O)Br	182.96	Hechao Chen et al.2024
	1450	598-16-3	1,1,2-tribromoethene	C(=C(Br)Br)Br	264.74	Hechao Chen et al.2024
	1451	1003-91-4	2,4,5-tribromo-1-methylimidazole	CN1C(=C(N=C1Br)Br)Br	318.79	Hechao Chen et al.2024
	1452	13665-98-0	2,3,4,5,6-pentabromoaniline	C1(=C(C(=C(C(=C1Br)Br)Br)Br)Br)N	487.61	Hechao Chen et al.2024
	1453	2845-89-8	1-chloro-3-methoxybenzene	COC1=CC(=CC=C1)Cl	142.58	Hechao Chen et al.2024
	1454	766-51-8	1-chloro-2-methoxybenzene	COC1=CC=CC=C1Cl	142.58	Hechao Chen et al.2024
	1455	3972-56-3	1-tert-butyl-4-chlorobenzene	CC(C)(C)C1=CC=C(C=C1)Cl	168.66	Hechao Chen et al.2024
	1456	2196-99-8	2-chloro-1-(4-methoxyphenyl)ethanone	COC1=CC=C(C=C1)C(=O)CCl	184.62	Hechao Chen et al.2024
	1457	37908-96-6	3-chloro-4-methoxybenzoic acid	COC1=C(C=C(C=C1)C(=O)O)Cl	186.59	Hechao Chen et al.2024
	1458	1710-98-1	4-tert-butylbenzoyl chloride	CC(C)(C)C1=CC=C(C=C1)C(=O)Cl	196.67	Hechao Chen et al.2024
	1459	21886-62-4	1-(4-tert-butylphenyl)-2-chloroethanone	CC(C)(C)C1=CC=C(C=C1)C(=O)CCl	210.7	Hechao Chen et al.2024
	1460	29003-60-9	2,2-dichloro-1-(4-methoxyphenyl)ethanone	COC1=CC=C(C=C1)C(=O)C(Cl)Cl	219.06	Hechao Chen et al.2024
	1461	150-76-5	4-methoxyphenol	COC1=CC=C(C=C1)O	124.14	Hechao Chen et al.2024
	1462	98-54-4	4-tert-butylphenol	CC(C)(C)C1=CC=C(C=C1)O	150.22	Hechao Chen et al.2024
	1463	98-73-7	4-tert-butylbenzoic acid	CC(C)(C)C1=CC=C(C=C1)C(=O)O	178.23	Hechao Chen et al.2024
	1464	51326-37-5	1-(4-tert-butylphenyl)-2,2,2-trichloroethanone	CC(C)(C)C1=CC=C(C=C1)C(=O)C(Cl)(Cl)Cl	279.6	Hechao Chen et al.2024
	1465	100-09-4	4-methoxybenzoic acid	COC1=CC=C(C=C1)C(=O)O	152.15	Hechao Chen et al.2024
	1466	34593-75-4	4-tert-butyl-2,6-dichlorophenol	CC(C)(C)C1=CC(=C(C(=C1)Cl)O)Cl	219.1	Hechao Chen et al.2024
	1467	100-07-2	4-methoxybenzoyl chloride	COC1=CC=C(C=C1)C(=O)Cl	170.59	Hechao Chen et al.2024
	1468	40104-07-2	chloromethanesulfonic acid	C(S(=O)(=O)O)Cl	130.55	Hechao Chen et al.2024
	1469	1493-13-6	trifluoromethanesulfonic acid	C(F)(F)(F)S(=O)(=O)O	150.08	Hechao Chen et al.2024
	1470	27153-10-2	trichloromethanesulfonic acid	C(S(=O)(=O)O)(Cl)(Cl)Cl	199.4	Hechao Chen et al.2024
	1471	490-79-9	2,5-dihydroxybenzoic acid	C1=CC(=C(C=C1O)C(=O)O)O	154.12	Hechao Chen et al.2024
	1472	1955-21-1	2,6-diiodobenzene-1,4-diol	C1=C(C=C(C(=C1I)O)I)O	361.9	Hechao Chen et al.2024
	1473	35911-92-3	trichloromethanol	C(O)(Cl)(Cl)Cl	135.37	Hechao Chen et al.2024
	1474	194033-03-9	2,2-dichloro-2-iodoacetic acid	C(=O)(C(Cl)(Cl)I)O	254.84	Hechao Chen et al.2024
	1475	64339-43-1	5-iodobenzene-1,3-diol	C1=C(C=C(C=C1O)I)O	236.01	Hechao Chen et al.2024
	1476	41046-68-8	4-iodobenzene-1,3-diol	C1=CC(=C(C=C1O)O)I	236.01	Hechao Chen et al.2024
	1477	41046-67-7	2-iodobenzene-1,3-diol	C1=CC(=C(C(=C1)O)I)O	236.01	Hechao Chen et al.2024
	1478	115970-17-7	1-[(6-chloropyridin-3-yl)methyl]-4,5-dihydroimidazol-2-amine	C1CN(C(=N1)N)CC2=CN=C(C=C2)Cl	210.66	Hechao Chen et al.2024
	1479	120868-66-8	1-[(6-chloropyridin-3-yl)methyl]imidazolidin-2-one	C1CN(C(=O)N1)CC2=CN=C(C=C2)Cl	211.65	Hechao Chen et al.2024
	1480	127-19-5	N,N-dimethylacetamide	CC(=O)N(C)C	87.12	Hechao Chen et al.2024
	1481	2732-25-4	3-chloro-9H-carbazole	C1=CC=C2C(=C1)C3=C(N2)C=CC(=C3)Cl	201.65	Hechao Chen et al.2024
	1482	58910-95-5	1,3,6-trichloro-9H-carbazole	C1=CC2=C(C=C1Cl)C3=C(N2)C(=CC(=C3)Cl)Cl	270.5	Hechao Chen et al.2024
	1483	58910-96-6	1,3,6,8-tetrachloro-9H-carbazole	C1=C(C=C(C2=C1C3=C(N2)C(=CC(=C3)Cl)Cl)Cl)Cl	305	Hechao Chen et al.2024
	1484	100131-03-1	1,8-dibromo-3,6-dichloro-9H-carbazole	C1=C(C=C(C2=C1C3=C(N2)C(=CC(=C3)Cl)Br)Br)Cl	393.9	Hechao Chen et al.2024
	1485	55119-10-3	1,3,6-tribromo-9H-carbazole	C1=CC2=C(C=C1Br)C3=C(N2)C(=CC(=C3)Br)Br	403.89	Hechao Chen et al.2024
	1486	55119-09-0	1,3,6,8-tetrabromo-9H-carbazole	C1=C(C=C(C2=C1C3=C(N2)C(=CC(=C3)Br)Br)Br)Br	482.79	Hechao Chen et al.2024
	1487	99-93-4	1-(4-hydroxyphenyl)ethanone	CC(=O)C1=CC=C(C=C1)O	136.15	Hechao Chen et al.2024
	1488	15174-69-3	4-hydroxy-3-methylbenzaldehyde	CC1=C(C=CC(=C1)C=O)O	136.15	Hechao Chen et al.2024
	1489	616-76-2	5-formyl-2-hydroxybenzoic acid	C1=CC(=C(C=C1C=O)C(=O)O)O	166.13	Hechao Chen et al.2024
	1490	584-87-2	3-formyl-4-hydroxybenzoic acid	C1=CC(=C(C=C1C(=O)O)C=O)O	166.13	Hechao Chen et al.2024
	1491	610-35-5	4-hydroxyphthalic acid	C1=CC(=C(C=C1O)C(=O)O)C(=O)O	182.13	Hechao Chen et al.2024
	1492	3387-26-6	furan-3,4-dicarboxylic acid	C1=C(C(=CO1)C(=O)O)C(=O)O	156.09	Hechao Chen et al.2024
	1493	64354-26-3	4,6-dibromo-5-hydroxypyridine-2-carboxylic acid	C1=C(C(=C(N=C1C(=O)O)Br)O)Br	296.9	Hechao Chen et al.2024
	1494	100-66-3	anisole	COC1=CC=CC=C1	108.14	Hechao Chen et al.2024
	1495	98-06-6	tert-butylbenzene	CC(C)(C)C1=CC=CC=C1	134.22	Hechao Chen et al.2024
	1496	3934-97-2	4-methoxybenzene-1,2-diol	COC1=CC(=C(C=C1)O)O	140.14	Hechao Chen et al.2024
	1497	615-67-8	2-chlorobenzene-1,4-diol	C1=CC(=C(C=C1O)Cl)O	144.55	Hechao Chen et al.2024
	1498	100-06-1	1-(4-methoxyphenyl)ethanone	CC(=O)C1=CC=C(C=C1)OC	150.17	Hechao Chen et al.2024
	1499	18113-03-6	2-chloro-4-methoxyphenol	COC1=CC(=C(C=C1)O)Cl	158.58	Hechao Chen et al.2024
	1500	109347-45-7	2-(4-tert-butylphenyl)acetaldehyde	CC(C)(C)C1=CC=C(C=C1)CC=O	176.25	Hechao Chen et al.2024
	1501	943-27-1	1-(4-tert-butylphenyl)ethanone	CC(=O)C1=CC=C(C=C1)C(C)(C)C	176.25	Hechao Chen et al.2024
	1502	7099-91-4	2-(4-methoxyphenyl)-2-oxoacetic acid	COC1=CC=C(C=C1)C(=O)C(=O)O	180.16	Hechao Chen et al.2024
	1503	583-69-7	2-bromobenzene-1,4-diol	C1=CC(=C(C=C1O)Br)O	189.01	Hechao Chen et al.2024
	1504	13422-77-0	3-(4-methoxyphenyl)-3-oxopropanoic acid	COC1=CC=C(C=C1)C(=O)CC(=O)O	194.18	Hechao Chen et al.2024
	1505	35310-75-9	1-(3-bromo-4-methoxyphenyl)ethanone	CC(=O)C1=CC(=C(C=C1)OC)Br	229.07	Hechao Chen et al.2024
	1506	2198-66-5	2-bromo-4-tert-butylphenol	CC(C)(C)C1=CC(=C(C=C1)O)Br	229.11	Hechao Chen et al.2024
	1507	38603-09-7	1,3-dibromo-2-methoxybenzene	COC1=C(C=CC=C1Br)Br	265.93	Hechao Chen et al.2024
	1508	363599-46-6	(4-tert-butylphenyl) 4-methoxybenzoate	CC(C)(C)C1=CC=C(C=C1)OC(=O)C2=CC=C(C=C2)OC	284.3	Hechao Chen et al.2024
	1509	98-22-6	2,6-dibromo-4-tert-butylphenol	CC(C)(C)C1=CC(=C(C(=C1)Br)O)Br	308.01	Hechao Chen et al.2024
	1510	153915-05-0	5-(chloromethyl)-2H-benzotriazole	C1=CC2=NNN=C2C=C1CCl	167.59	Hechao Chen et al.2024
	1511	119437-62-6	bromo(hydroperoxy)methane	C(OO)Br	126.94	Hechao Chen et al.2024
	1512	618-30-4	5-chlorofuran-2-carboxylic acid	C1=C(OC(=C1)Cl)C(=O)O	146.53	Hechao Chen et al.2024
	1513	585-70-6	5-bromofuran-2-carboxylic acid	C1=C(OC(=C1)Br)C(=O)O	190.98	Hechao Chen et al.2024
	1514	51-39-8	3,4,5-trichlorobenzoic acid	C1=C(C=C(C(=C1Cl)Cl)Cl)C(=O)O	225.5	Hechao Chen et al.2024
	1515	35077-12-4	N-bromo-2,2,2-trichloroacetamide	C(=O)(C(Cl)(Cl)Cl)NBr	241.29	Hechao Chen et al.2024
	1516	117-18-0	1,2,4,5-tetrachloro-3-nitrobenzene	C1=C(C(=C(C(=C1Cl)Cl)[N+](=O)[O-])Cl)Cl	260.9	Hechao Chen et al.2024
	1517	289039-25-4	3-chloro-5-iodobenzoic acid	C1=C(C=C(C=C1Cl)I)C(=O)O	282.46	Hechao Chen et al.2024
	1518	103-84-4	N-phenylacetamide	CC(=O)NC1=CC=CC=C1	135.16	Hechao Chen et al.2024
	1519	17228-74-9	2,6-dichloro-1H-pyridin-4-one	C1=C(NC(=CC1=O)Cl)Cl	163.99	Hechao Chen et al.2024
	1520	130115-85-4	5-bromo-6-chloropyridin-3-ol	C1=C(C=NC(=C1Br)Cl)O	208.44	Hechao Chen et al.2024
	1521	286946-77-8	5-bromo-2-chloropyridin-3-ol	C1=C(C=NC(=C1O)Cl)Br	208.44	Hechao Chen et al.2024
	1522	78443-72-8	2,4-dichloro-6-hydroxybenzaldehyde	C1=C(C=C(C(=C1O)C=O)Cl)Cl	191.01	Hechao Chen et al.2024
	1523	717871-81-3	3,4-dimethoxyfuran-2-carbonyl chloride	COC1=COC(=C1OC)C(=O)Cl	190.58	Hechao Chen et al.2024
	1524	22752-94-9	(E)-2-chloro-4-oxohex-2-enedioic acid	C(C(=O)C=C(C(=O)O)Cl)C(=O)O	192.55	Hechao Chen et al.2024
	1525	83124-79-2	2,2-dichloro-1-(3,4-dihydro-2H-pyran-5-yl)ethanone	C1CC(=COC1)C(=O)C(Cl)Cl	195.04	Hechao Chen et al.2024
	1526	32417-81-5	3,4,5-trichlorofuran-2-carboxylic acid	C1(=C(OC(=C1Cl)Cl)C(=O)O)Cl	215.41	Hechao Chen et al.2024
	1527	84743-75-9	2,4-dibromobenzene-1,3,5-triol	C1=C(C(=C(C(=C1O)Br)O)Br)O	283.9	Hechao Chen et al.2024
	1528	497-16-5	2-oxopropanedial	C(=O)C(=O)C=O	86.05	Hechao Chen et al.2024
	1529	570-23-0	3-amino-2-hydroxybenzoic acid	C1=CC(=C(C(=C1)N)O)C(=O)O	153.14	Hechao Chen et al.2024
	1530	394-31-0	2-amino-5-hydroxybenzoic acid	C1=CC(=C(C=C1O)C(=O)O)N	153.14	Hechao Chen et al.2024
	1531	29681-43-4	methyl 4-methoxypyridine-2-carboxylate	COC1=CC(=NC=C1)C(=O)OC	167.16	Hechao Chen et al.2024
	1532	2040-88-2	2-bromo-6-chlorophenol	C1=CC(=C(C(=C1)Br)O)Cl	207.45	Hechao Chen et al.2024
	1533	10268-06-1	2-(2-chlorophenyl)acetamide	C1=CC=C(C(=C1)CC(=O)N)Cl	169.61	Hechao Chen et al.2024
	1534	58357-84-9	2-(3-chlorophenyl)acetamide	C1=CC(=CC(=C1)Cl)CC(=O)N	169.61	Hechao Chen et al.2024
	1535	55954-27-3	2-(2,4-dichlorophenyl)acetamide	C1=CC(=C(C=C1Cl)Cl)CC(=O)N	204.05	Hechao Chen et al.2024
	1536	78433-88-2	2-(2,6-dichlorophenyl)acetamide	C1=CC(=C(C(=C1)Cl)CC(=O)N)Cl	204.05	Hechao Chen et al.2024
	1537	868697-78-3	2-(3,4-dichlorophenyl)acetamide	C1=CC(=C(C=C1CC(=O)N)Cl)Cl	204.05	Hechao Chen et al.2024
	1538	60312-83-6	2-(3-bromophenyl)acetamide	C1=CC(=CC(=C1)Br)CC(=O)N	214.06	Hechao Chen et al.2024
	1539	65999-53-3	2-(2-bromophenyl)acetamide	C1=CC=C(C(=C1)CC(=O)N)Br	214.06	Hechao Chen et al.2024
	1540	195456-43-0	2-(2-iodophenyl)acetamide	C1=CC=C(C(=C1)CC(=O)N)I	261.06	Hechao Chen et al.2024
	1541	95-51-2	2-chloroaniline	C1=CC=C(C(=C1)N)Cl	127.57	Hechao Chen et al.2024
	1542	554-00-7	2,4-dichloroaniline	C1=CC(=C(C=C1Cl)Cl)N	162.01	Hechao Chen et al.2024
	1543	615-36-1	2-bromoaniline	C1=CC=C(C(=C1)N)Br	172.02	Hechao Chen et al.2024
	1544	635-22-3	4-chloro-3-nitroaniline	C1=CC(=C(C=C1N)[N+](=O)[O-])Cl	172.57	Hechao Chen et al.2024
	1545	121-87-9	2-chloro-4-nitroaniline	C1=CC(=C(C=C1[N+](=O)[O-])Cl)N	172.57	Hechao Chen et al.2024
	1546	38762-41-3	4-bromo-2-chloroaniline	C1=CC(=C(C=C1Br)Cl)N	206.47	Hechao Chen et al.2024
	1547	29666-56-6	2-bromo-6-chlorocyclohexa-2,5-diene-1,4-dione	C1=C(C(=O)C(=CC1=O)Br)Cl	221.43	Hechao Chen et al.2024
	1548	117-34-0	2,2-diphenylacetic acid	C1=CC=C(C=C1)C(C2=CC=CC=C2)C(=O)O	212.24	Hechao Chen et al.2024
	1549	1010-60-2	2-chloronaphthalene-1,4-dione	C1=CC=C2C(=C1)C(=O)C=C(C2=O)Cl	192.6	Hechao Chen et al.2024
	1550	2065-37-4	2-bromonaphthalene-1,4-dione	C1=CC=C2C(=C1)C(=O)C=C(C2=O)Br	237.05	Hechao Chen et al.2024
	1551	117-80-6	2,3-dichloronaphthalene-1,4-dione	C1=CC=C2C(=C1)C(=O)C(=C(C2=O)Cl)Cl	227.04	Hechao Chen et al.2024
	1552	13243-65-7	2,3-dibromonaphthalene-1,4-dione	C1=CC=C2C(=C1)C(=O)C(=C(C2=O)Br)Br	315.94	Hechao Chen et al.2024
	1553	695-99-8	2-chlorocyclohexa-2,5-diene-1,4-dione	C1=CC(=O)C(=CC1=O)Cl	142.54	Hechao Chen et al.2024
	1554	1123-64-4	2-chloro-6-methylcyclohexa-2,5-diene-1,4-dione	CC1=CC(=O)C=C(C1=O)Cl	156.56	Hechao Chen et al.2024
	1555	40967-77-9	5-chloro-2,3-dimethylcyclohexa-2,5-diene-1,4-dione	CC1=C(C(=O)C(=CC1=O)Cl)C	170.59	Hechao Chen et al.2024
	1556	3958-82-5	2-bromocyclohexa-2,5-diene-1,4-dione	C1=CC(=O)C(=CC1=O)Br	186.99	Hechao Chen et al.2024
	1557	6293-55-6	2-bromo-6-methylcyclohexa-2,5-diene-1,4-dione	CC1=CC(=O)C=C(C1=O)Br	201.02	Hechao Chen et al.2024
	1558	15707-31-0	2,3-dichloro-5,6-dimethylcyclohexa-2,5-diene-1,4-dione	CC1=C(C(=O)C(=C(C1=O)Cl)Cl)C	205.03	Hechao Chen et al.2024
	1559	3958-83-6	2-iodocyclohexa-2,5-diene-1,4-dione	C1=CC(=O)C(=CC1=O)I	233.99	Hechao Chen et al.2024
	1560	25779-26-4	2,3,5-tribromocyclohexa-2,5-diene-1,4-dione	C1=C(C(=O)C(=C(C1=O)Br)Br)Br	344.78	Hechao Chen et al.2024
	1561	619-08-9	2-chloro-4-nitrophenol	C1=CC(=C(C=C1[N+](=O)[O-])Cl)O	173.55	Hechao Chen et al.2024
	1562	946-31-6	2-chloro-4,6-dinitrophenol	C1=C(C=C(C(=C1[N+](=O)[O-])O)Cl)[N+](=O)[O-]	218.55	Hechao Chen et al.2024
	1563	74696-96-1	3-acetyl-7-(diethylamino)chromen-2-one	CCN(CC)C1=CC2=C(C=C1)C=C(C(=O)O2)C(=O)C	259.3	Hechao Chen et al.2024
	1564	478-94-4	(6aR,9R)-7-methyl-6,6a,8,9-tetrahydro-4H-indolo[4,3-fg]quinoline-9-carboxamide	CN1CC(C=C2C1CC3=CNC4=CC=CC2=C34)C(=O)N	267.33	Hechao Chen et al.2024
	1565	540515-70-6	2-amino-N-[2-(4-methylphenoxy)ethyl]benzamide	CC1=CC=C(C=C1)OCCNC(=O)C2=CC=CC=C2N	270.33	Hechao Chen et al.2024
	1566	50-60-2	3-[N-(4,5-dihydro-1H-imidazol-2-ylmethyl)-4-methylanilino]phenol	CC1=CC=C(C=C1)N(CC2=NCCN2)C3=CC(=CC=C3)O	281.35	Hechao Chen et al.2024
	1567	1508-75-4	N-ethyl-3-hydroxy-2-phenyl-N-(pyridin-4-ylmethyl)propanamide	CCN(CC1=CC=NC=C1)C(=O)C(CO)C2=CC=CC=C2	284.35	Hechao Chen et al.2024
	1568	80614-27-3	1-[(E)-3-phenylmethoxyoct-1-enyl]imidazole	CCCCCC(C=CN1C=CN=C1)OCC2=CC=CC=C2	284.4	Hechao Chen et al.2024
	1569	91-84-9	N'-[(4-methoxyphenyl)methyl]-N,N-dimethyl-N'-pyridin-2-ylethane-1,2-diamine	CN(C)CCN(CC1=CC=C(C=C1)OC)C2=CC=CC=N2	285.4	Hechao Chen et al.2024
	1570	2391-56-2	4-[5-(4-aminophenoxy)pentoxy]aniline	C1=CC(=CC=C1N)OCCCCCOC2=CC=C(C=C2)N	286.37	Hechao Chen et al.2024
	1571	122852-42-0	5-methyl-2-[(5-methyl-1H-imidazol-4-yl)methyl]-3,4-dihydropyrido[4,3-b]indol-1-one	CC1=C(N=CN1)CN2CCC3=C(C2=O)C4=CC=CC=C4N3C	294.35	Hechao Chen et al.2024
	1572	139756-03-9	4-[(2-ethoxybenzoyl)amino]-2-methyl-5-propylpyrazole-3-carboxamide	CCCC1=NN(C(=C1NC(=O)C2=CC=CC=C2OCC)C(=O)N)C	330.4	Hechao Chen et al.2024
	1573	1891-95-8	3,5-dichloro-4-hydroxybenzonitrile	C1=C(C=C(C(=C1Cl)O)Cl)C#N	188.01	Hechao Chen et al.2024
	1574	3336-32-1	3,5-dichloro-2-hydroxybenzonitrile	C1=C(C=C(C(=C1C#N)O)Cl)Cl	188.01	Hechao Chen et al.2024
	1575	1689-86-7	3-bromo-5-chloro-4-hydroxybenzonitrile	C1=C(C=C(C(=C1Cl)O)Br)C#N	232.46	Hechao Chen et al.2024
	1576	1260810-06-7	5-bromo-3-chloro-2-hydroxybenzonitrile	C1=C(C=C(C(=C1C#N)O)Cl)Br	232.46	Hechao Chen et al.2024
	1577	1689-84-5	3,5-dibromo-4-hydroxybenzonitrile	C1=C(C=C(C(=C1Br)O)Br)C#N	276.91	Hechao Chen et al.2024
	1578	40718-08-9	3,5-dibromo-2-hydroxybenzonitrile	C1=C(C=C(C(=C1C#N)O)Br)Br	276.91	Hechao Chen et al.2024
	1579	1689-83-4	4-hydroxy-3,5-diiodobenzonitrile	C1=C(C=C(C(=C1I)O)I)C#N	370.91	Hechao Chen et al.2024
	1580	77323-84-3	1,2,3-trichlorocyclopenta-1,3-diene	C1C=C(C(=C1Cl)Cl)Cl	169.43	Hechao Chen et al.2024
	1581	695-77-2	1,2,3,4-tetrachlorocyclopenta-1,3-diene	C1C(=C(C(=C1Cl)Cl)Cl)Cl	203.9	Hechao Chen et al.2024
	1582	25329-35-5	1,2,3,4,5-pentachlorocyclopenta-1,3-diene	C1(C(=C(C(=C1Cl)Cl)Cl)Cl)Cl	238.3	Hechao Chen et al.2024
	1583	260-94-6	acridine	C1=CC=C2C(=C1)C=C3C=CC=CC3=N2	179.22	Hechao Chen et al.2024
	1584	885-23-4	acridine-9-carbaldehyde	C1=CC=C2C(=C1)C(=C3C=CC=CC3=N2)C=O	207.23	Hechao Chen et al.2024
	1585	50700-49-7	N-(4-oxocyclohexa-2,5-dien-1-ylidene)acetamide	CC(=O)N=C1C=CC(=O)C=C1	149.15	Hechao Chen et al.2024
	1586	105326-71-4	N-(2,3-dichloro-4-hydroxyphenyl)acetamide	CC(=O)NC1=C(C(=C(C=C1)O)Cl)Cl	220.05	Hechao Chen et al.2024
	1587	54237-72-8	1-cyano-2-methyl-3-[2-[(5-methyl-1H-imidazol-4-yl)methylsulfinyl]ethyl]guanidine	CC1=C(N=CN1)CS(=O)CCNC(=NC)NC#N	268.34	Hechao Chen et al.2024
	1588	29636-87-1	(5-methyl-1H-imidazol-4-yl)methanol	CC1=C(N=CN1)CO	112.13	Hechao Chen et al.2024
	1589	86604-94-6	4-chloro-5-methyl-1H-imidazole	CC1=C(N=CN1)Cl	116.55	Hechao Chen et al.2024
	1590	27204-57-5	[2-(2,6-dichloroanilino)phenyl]methanol	C1=CC=C(C(=C1)CO)NC2=C(C=CC=C2Cl)Cl	268.13	Hechao Chen et al.2024
	1591	161559-08-6	1-chloro-4-(2-methoxyethyl)benzene	COCCC1=CC=C(C=C1)Cl	170.63	Hechao Chen et al.2024
	1592	4526-56-1	2,4-dibromo-6-chlorophenol	C1=C(C=C(C(=C1Cl)O)Br)Br	286.35	Hechao Chen et al.2024
	1593	150900-92-8	2-bromo-6-chlorobenzene-1,4-diol	C1=C(C=C(C(=C1Cl)O)Br)O	223.45	Hechao Chen et al.2024
	1594	25841-43-4	2-methyl-2-methylsulfonylpropanoic acid	CC(C)(C(=O)O)S(=O)(=O)C	166.2	Hechao Chen et al.2024
	1595	7651-91-4	N,N-dichloromethanamine	CN(Cl)Cl	99.94	Hechao Chen et al.2024
	1596	10025-85-1		N(Cl)(Cl)Cl	120.36	Hechao Chen et al.2024
	1597	36507-30-9	3-oxa-11-azatetracyclo[10.4.0.02,4.05,10]hexadeca-1(16),5,7,9,12,14-hexaene-11-carboxamide	C1=CC=C2C(=C1)C3C(O3)C4=CC=CC=C4N2C(=O)N	252.27	Hechao Chen et al.2024
	1598	611-10-9	ethyl 2-oxocyclopentane-1-carboxylate	CCOC(=O)C1CCCC1=O	156.18	Hechao Chen et al.2024
	1599	3058-01-3	3-methylhexanedioic acid	CC(CCC(=O)O)CC(=O)O	160.17	Hechao Chen et al.2024
	1600	1076-38-6	4-hydroxychromen-2-one	C1=CC=C2C(=C1)C(=CC(=O)O2)O	162.14	Hechao Chen et al.2024
	1601	16536-36-0	1,4-benzodioxine-2,3-dione	C1=CC=C2C(=C1)OC(=O)C(=O)O2	164.11	Hechao Chen et al.2024
	1602	614-60-8	(E)-3-(2-hydroxyphenyl)prop-2-enoic acid	C1=CC=C(C(=C1)C=CC(=O)O)O	164.16	Hechao Chen et al.2024
	1603	17119-15-2	2-hydroxy-2-(3-hydroxyphenyl)acetic acid	C1=CC(=CC(=C1)O)C(C(=O)O)O	168.15	Hechao Chen et al.2024
	1604	6065-82-3	ethyl 2,2-diethoxyacetate	CCOC(C(=O)OCC)OCC	176.21	Hechao Chen et al.2024
	1605	79713-03-4	4-hydroxy-1H-imidazole-5-carbonitrile	C1=NC(=C(N1)C#N)O	109.09	Hechao Chen et al.2024
	1606	98-98-6	pyridine-2-carboxylic acid	C1=CC=NC(=C1)C(=O)O	123.11	Hechao Chen et al.2024
	1607	2380-94-1	1H-indol-4-ol	C1=CC2=C(C=CN2)C(=C1)O	133.15	Hechao Chen et al.2024
	1608	19621-92-2	6-oxo-1H-pyridine-2-carboxylic acid	C1=CC(=O)NC(=C1)C(=O)O	139.11	Hechao Chen et al.2024
	1609	79-44-7	N,N-dimethylcarbamoyl chloride	CN(C)C(=O)Cl	107.54	Hechao Chen et al.2024
	1610	11069-19-5	1,1-dichlorobut-1-ene	CCC=C(Cl)Cl	124.99	Hechao Chen et al.2024
	1611	79-49-2	1,1,1,3,3-pentabromopropan-2-one	C(C(=O)C(Br)(Br)Br)(Br)Br	452.56	Hechao Chen et al.2024
	1612	557-68-6	bromo(iodo)methane	C(Br)I	220.84	Hechao Chen et al.2024
	1613	3019-04-3	1-iodopropan-2-one	CC(=O)CI	183.98	Hechao Chen et al.2024
	1614	88525-62-6	1,1-diiodopropan-2-one	CC(=O)C(I)I	309.87	Hechao Chen et al.2024
	1615	470-82-6	1,3,3-trimethyl-2-oxabicyclo[2.2.2]octane	CC1(C2CCC(O1)(CC2)C)C	154.25	Hechao Chen et al.2024
	1616	10396-80-2	2,6-ditert-butyl-4-hydroxy-4-methylcyclohexa-2,5-dien-1-one	CC1(C=C(C(=O)C(=C1)C(C)(C)C)C(C)(C)C)O	236.35	Hechao Chen et al.2024
	1617	128-37-0	2,6-ditert-butyl-4-methylphenol	CC1=CC(=C(C(=C1)C(C)(C)C)O)C(C)(C)C	220.35	Hechao Chen et al.2024
	1618	4489-61-6	dibutan-2-yl benzene-1,2-dicarboxylate	CCC(C)OC(=O)C1=CC=CC=C1C(=O)OC(C)CC	278.34	Hechao Chen et al.2024
	1619	82304-66-3	7,9-ditert-butyl-1-oxaspiro[4.5]deca-6,9-diene-2,8-dione	CC(C)(C)C1=CC2(CCC(=O)O2)C=C(C1=O)C(C)(C)C	276.4	Hechao Chen et al.2024
	1620	874-18-0	2,4-dibromo-6-chloroaniline	C1=C(C=C(C(=C1Cl)N)Br)Br	285.36	Hechao Chen et al.2024
	1621	939-19-5	3-hydroxychromen-2-one	C1=CC=C2C(=C1)C=C(C(=O)O2)O	162.14	Hechao Chen et al.2024
	1622	15969-10-5	2-bromo-4-chloro-6-nitrophenol	C1=C(C=C(C(=C1[N+](=O)[O-])O)Br)Cl	252.45	Hechao Chen et al.2024
	1623	78-87-5	1,2-dichloropropane	CC(CCl)Cl	112.98	Hechao Chen et al.2024
	1624	79-77-6	(E)-4-(2,6,6-trimethylcyclohexen-1-yl)but-3-en-2-one	CC1=C(C(CCC1)(C)C)C=CC(=O)C	192.3	Hechao Chen et al.2024
	1625	432-25-7	2,6,6-trimethylcyclohexene-1-carbaldehyde	CC1=C(C(CCC1)(C)C)C=O	152.23	Hechao Chen et al.2024
	1626	2408-37-9	2,2,6-trimethylcyclohexan-1-one	CC1CCCC(C1=O)(C)C	140.22	Hechao Chen et al.2024
	1627	52175-99-2	N-chloroformamide	C(=O)NCl	79.48	Hechao Chen et al.2024
	1628	637-61-6	4-chloroiminocyclohexa-2,5-dien-1-one	C1=CC(=O)C=CC1=NCl	141.55	Hechao Chen et al.2024
	1629	645-56-7	4-propylphenol	CCCC1=CC=C(C=C1)O	136.19	Hechao Chen et al.2024
	1630	14191-95-8	2-(4-hydroxyphenyl)acetonitrile	C1=CC(=CC=C1CC#N)O	133.15	Hechao Chen et al.2024
	1631	7495-69-4	2,6-dichloro-4-ethylphenol	CCC1=CC(=C(C(=C1)Cl)O)Cl	191.05	Hechao Chen et al.2024
	1632	13669-42-6	quinoline-3-carbaldehyde	C1=CC=C2C(=C1)C=C(C=N2)C=O	157.17	Hechao Chen et al.2024
	1633	2591-98-2	2-(1H-indol-3-yl)acetaldehyde	C1=CC=C2C(=C1)C(=CN2)CC=O	159.18	Hechao Chen et al.2024
	1634	609-66-5	2-chlorobenzamide	C1=CC=C(C(=C1)C(=O)N)Cl	155.58	Hechao Chen et al.2024
	1635	2447-79-2	2,4-dichlorobenzamide	C1=CC(=C(C=C1Cl)Cl)C(=O)N	190.02	Hechao Chen et al.2024
	1636	2008-58-4	2,6-dichlorobenzamide	C1=CC(=C(C(=C1)Cl)C(=O)N)Cl	190.02	Hechao Chen et al.2024
	1637	4001-73-4	2-bromobenzamide	C1=CC=C(C(=C1)C(=O)N)Br	200.03	Hechao Chen et al.2024
	1638	175205-85-3	3,5-dibromobenzamide	C1=C(C=C(C=C1Br)Br)C(=O)N	278.93	Hechao Chen et al.2024
	1639	3930-83-4	2-iodobenzamide	C1=CC=C(C(=C1)C(=O)N)I	247.03	Hechao Chen et al.2024
	1640	1046818-83-0	2-chloro-4-hydroxybenzamide	C1=CC(=C(C=C1O)Cl)C(=O)N	171.58	Hechao Chen et al.2024
	1641	6329-74-4	5-bromo-2-hydroxybenzamide	C1=CC(=C(C=C1Br)C(=O)N)O	216.03	Hechao Chen et al.2024
	1642	609-89-2	2,4-dichloro-6-nitrophenol	C1=C(C=C(C(=C1[N+](=O)[O-])O)Cl)Cl	208	Hechao Chen et al.2024
	1643	58349-01-2	4-bromo-2-chloro-6-nitrophenol	C1=C(C=C(C(=C1[N+](=O)[O-])O)Cl)Br	252.45	Hechao Chen et al.2024
	1644	15969-09-2	2,4-dibromo-6-nitrophenol	C1=C(C=C(C(=C1[N+](=O)[O-])O)Br)Br	296.9	Hechao Chen et al.2024
	1645	1820-81-1	5-chloro-1H-pyrimidine-2,4-dione	C1=C(C(=O)NC(=O)N1)Cl	146.53	Hechao Chen et al.2024
	1646	4270-27-3	6-chloro-1H-pyrimidine-2,4-dione	C1=C(NC(=O)NC1=O)Cl	146.53	Hechao Chen et al.2024
	1647	1839-18-5	2-chloro-7H-purin-6-amine	C1=NC2=NC(=NC(=C2N1)N)Cl	169.57	Hechao Chen et al.2024
	1648	10310-21-1	6-chloro-7H-purin-2-amine	C1=NC2=C(N1)C(=NC(=N2)N)Cl	169.57	Hechao Chen et al.2024
	1649	51-20-7	5-bromo-1H-pyrimidine-2,4-dione	C1=C(C(=O)NC(=O)N1)Br	190.98	Hechao Chen et al.2024
	1650	101-38-2	2,6-dichloro-4-chloroiminocyclohexa-2,5-dien-1-one	C1=C(C(=O)C(=CC1=NCl)Cl)Cl	210.4	Hechao Chen et al.2024
	1651	537-45-1	2,6-dibromo-4-chloroiminocyclohexa-2,5-dien-1-one	C1=C(C(=O)C(=CC1=NCl)Br)Br	299.35	Hechao Chen et al.2024
	1652	25523-14-2	3,3-dichloroprop-1-yne	C#CC(Cl)Cl	108.95	Hechao Chen et al.2024
	1653	5166-35-8	3-chloro-2-methylbut-1-ene	CC(C(=C)C)Cl	104.58	Hechao Chen et al.2024
	1654	507-45-9	2,3-dichloro-2-methylbutane	CC(C(C)(C)Cl)Cl	141.04	Hechao Chen et al.2024
	1655	17773-65-8	2-chloro-3-methylbut-2-ene	CC(=C(C)Cl)C	104.58	Hechao Chen et al.2024
	1656	4166-46-5	2,3-dimethylhexan-3-ol	CCCC(C)(C(C)C)O	130.23	Hechao Chen et al.2024
	1657	1067-09-0	1,3-dichloro-2-(chloromethyl)-2-methylpropane	CC(CCl)(CCl)CCl	175.48	Hechao Chen et al.2024
	1658	23010-02-8	2-(chloromethyl)but-1-ene	CCC(=C)CCl	104.58	Hechao Chen et al.2024
	1659	2040-83-7	2,4-dichloro-6-iodophenol	C1=C(C=C(C(=C1Cl)O)I)Cl	288.89	Hechao Chen et al.2024
	1660	63709-57-9	2,3-dichloro-6-(2,4-dichlorophenoxy)phenol	C1=CC(=C(C=C1Cl)Cl)OC2=C(C(=C(C=C2)Cl)Cl)O	324	Hechao Chen et al.2024
	1661	3380-44-7	4,5-dichloro-2-(2,4-dichlorophenoxy)phenol	C1=CC(=C(C=C1Cl)Cl)OC2=CC(=C(C=C2O)Cl)Cl	324	Hechao Chen et al.2024
	1662	53555-01-4	2,3,4-trichloro-6-(2,4-dichlorophenoxy)phenol	C1=CC(=C(C=C1Cl)Cl)OC2=CC(=C(C(=C2O)Cl)Cl)Cl	358.4	Hechao Chen et al.2024
	1663	202982-72-7	4-chloro-3-iodophenol	C1=CC(=C(C=C1O)I)Cl	254.45	Hechao Chen et al.2024
	1664	207115-22-8	4-bromo-2-iodophenol	C1=CC(=C(C=C1Br)I)O	298.9	Hechao Chen et al.2024
	1665	15459-51-5	4-bromo-2,6-diiodophenol	C1=C(C=C(C(=C1I)O)I)Br	424.8	Hechao Chen et al.2024
	1666	20103-10-0	2,6-dichlorobenzene-1,4-diol	C1=C(C=C(C(=C1Cl)O)Cl)O	179	Hechao Chen et al.2024
	1667	54-05-7	4-N-(7-chloroquinolin-4-yl)-1-N,1-N-diethylpentane-1,4-diamine	CCN(CC)CCCC(C)NC1=C2C=CC(=CC2=NC=C1)Cl	319.9	Hechao Chen et al.2024
	1668	90986-10-0	2,6-dichloro-4-(2,4,6-trichlorophenoxy)phenol	C1=C(C=C(C(=C1Cl)O)Cl)OC2=C(C=C(C=C2Cl)Cl)Cl	358.4	Hechao Chen et al.2024
	1669	18936-17-9	2-methylbutanenitrile	CCC(C)C#N	83.13	Hechao Chen et al.2024
	1670	5426-65-3	4-bromo-1,5-dimethyl-2-phenylpyrazol-3-one	CC1=C(C(=O)N(N1C)C2=CC=CC=C2)Br	267.12	Hechao Chen et al.2024
	1671	681490-35-7	2-chloro-6-hydroxycyclohexa-2,5-diene-1,4-dione	C1=C(C(=O)C(=CC1=O)Cl)O	158.54	Hechao Chen et al.2024
	1672	23893-13-2	(1S,2R,3R,4S,5R,8R,9S,10S,11R,12R,14R)-11-[(2S,3R,4S,6R)-4-(dimethylamino)-3-hydroxy-6-methyloxan-2-yl]oxy-5-ethyl-3-hydroxy-9-[(2R,4R,5S,6S)-5-hydroxy-4-methoxy-4,6-dimethyloxan-2-yl]oxy-2,4,8,10,12,14-hexamethyl-6,15,16-trioxatricyclo[10.2.1.11,4]hexadecan-7-one	CCC1C2(C(C(C3(O2)C(CC(O3)(C(C(C(C(C(=O)O1)C)OC4CC(C(C(O4)C)O)(C)OC)C)OC5C(C(CC(O5)C)N(C)C)O)C)C)C)O)C	715.9	Hechao Chen et al.2024
	1673	101666-68-6	(3R,4S,5S,6R,7R,9R,11R,12R,13S,14R)-14-ethyl-12,13-dihydroxy-4-[(2R,4R,5S,6S)-5-hydroxy-4-methoxy-4,6-dimethyloxan-2-yl]oxy-6-[(2S,3R,4S,6R)-3-hydroxy-6-methyl-4-(methylamino)oxan-2-yl]oxy-7-methoxy-3,5,7,9,11,13-hexamethyl-oxacyclotetradecane-2,10-dione	CCC1C(C(C(C(=O)C(CC(C(C(C(C(C(=O)O1)C)OC2CC(C(C(O2)C)O)(C)OC)C)OC3C(C(CC(O3)C)NC)O)(C)OC)C)C)O)(C)O	733.9	Hechao Chen et al.2024
	1674	5598-15-2	diethyl (3,5,6-trichloropyridin-2-yl) phosphate	CCOP(=O)(OCC)OC1=NC(=C(C=C1Cl)Cl)Cl	334.5	Hechao Chen et al.2024
	1675	1575569-69-5	1-[(6-chloropyridin-3-yl)methyl]-2-nitroguanidine	C1=CC(=NC=C1CNC(=N[N+](=O)[O-])N)Cl	229.62	Hechao Chen et al.2024
	1676	5470-15-5	N-(3,4-dichlorophenyl)formamide	C1=CC(=C(C=C1NC=O)Cl)Cl	190.02	Hechao Chen et al.2024
	1677	23100-12-1	6-chloropyridine-3-carbaldehyde	C1=CC(=NC=C1C=O)Cl	141.55	Hechao Chen et al.2024
	1678	5326-23-8	6-chloropyridine-3-carboxylic acid	C1=CC(=NC=C1C(=O)O)Cl	157.55	Hechao Chen et al.2024
	1679	95-74-9	3-chloro-4-methylaniline	CC1=C(C=C(C=C1)N)Cl	141.6	Hechao Chen et al.2024
	1680	7260-94-8	dimethylcarbamic acid	CN(C)C(=O)O	89.09	Hechao Chen et al.2024
	1681	3964-52-1	4-amino-2-chlorophenol	C1=CC(=C(C=C1N)Cl)O	143.57	Hechao Chen et al.2024
	1682	6358-06-1	5-amino-2-chlorophenol	C1=CC(=C(C=C1N)O)Cl	143.57	Hechao Chen et al.2024
	1683	13047-04-6	4-aminobenzene-1,2-diol	C1=CC(=C(C=C1N)O)O	125.13	Hechao Chen et al.2024
	1684	101328-98-7	2,4-dichlorobenzene-1,3,5-triol	C1=C(C(=C(C(=C1O)Cl)O)Cl)O	195	Hechao Chen et al.2024
	1685	60939-21-1	2-oxoacetamide	C(=O)C(=O)N	73.05	Hechao Chen et al.2024
	1686	542-78-9	propanedial	C(C=O)C=O	72.06	Hechao Chen et al.2024
	1687	631-66-3	2-oxopropanamide	CC(=O)C(=O)N	87.08	Hechao Chen et al.2024
	1688	62094-45-5	furan-2,3-dione	C1=COC(=O)C1=O	98.06	Hechao Chen et al.2024
	1689	30887-80-0	2-oxobutanamide	CCC(=O)C(=O)N	101.1	Hechao Chen et al.2024
	1690	27719-81-9	4-oxobutanamide	C(CC(=O)N)C=O	101.1	Hechao Chen et al.2024
	1691	921-11-9	pentane-2,3,4-trione	CC(=O)C(=O)C(=O)C	114.1	Hechao Chen et al.2024
	1692	120-92-3	cyclopentanone	C1CCC(=O)C1	84.12	Hechao Chen et al.2024
	1693	600-14-6	pentane-2,3-dione	CCC(=O)C(=O)C	100.12	Hechao Chen et al.2024
	1694	7424-54-6	heptane-3,5-dione	CCC(=O)CC(=O)CC	128.17	Hechao Chen et al.2024
	1695	932-66-1	1-(cyclohexen-1-yl)ethanone	CC(=O)C1=CCCCC1	124.18	Hechao Chen et al.2024
	1696	598-02-7	diethyl hydrogen phosphate	CCOP(=O)(O)OCC	154.1	Hechao Chen et al.2024
	1697	2814-20-2	4-methyl-2-propan-2-yl-1H-pyrimidin-6-one	CC1=CC(=O)NC(=N1)C(C)C	152.19	Hechao Chen et al.2024
	1698	626-48-2	6-methyl-1H-pyrimidine-2,4-dione	CC1=CC(=O)NC(=O)N1	126.11	Hechao Chen et al.2024
	1699	962-58-3	diethyl (6-methyl-2-propan-2-ylpyrimidin-4-yl) phosphate	CCOP(=O)(OCC)OC1=NC(=NC(=C1)C)C(C)C	288.28	Hechao Chen et al.2024
	1700	5337-72-4	2,6-dimethylcyclohexan-1-ol	CC1CCCC(C1O)C	128.21	Hechao Chen et al.2024
	1701	2148928-89-4	2,6-dichloro-4-(4-hydroxyphenyl)sulfonylphenol	C1=CC(=CC=C1O)S(=O)(=O)C2=CC(=C(C(=C2)Cl)O)Cl	319.2	Hechao Chen et al.2024
	1702	46947-87-9	2-chloro-4-(3-chloro-4-hydroxyphenyl)sulfonylphenol	C1=CC(=C(C=C1S(=O)(=O)C2=CC(=C(C=C2)O)Cl)Cl)O	319.2	Hechao Chen et al.2024
	1703	80396-78-7	2,6-dichloro-4-(3-chloro-4-hydroxyphenyl)sulfonylphenol	C1=CC(=C(C=C1S(=O)(=O)C2=CC(=C(C(=C2)Cl)O)Cl)Cl)O	353.6	Hechao Chen et al.2024
	1704	30609-79-1	2,6-dichloro-4-(3,5-dichloro-4-hydroxyphenyl)sulfonylphenol	C1=C(C=C(C(=C1Cl)O)Cl)S(=O)(=O)C2=CC(=C(C(=C2)Cl)O)Cl	388	Hechao Chen et al.2024
	1705	98-67-9	4-hydroxybenzenesulfonic acid	C1=CC(=CC=C1O)S(=O)(=O)O	174.18	Hechao Chen et al.2024
	1706	55191-20-3	(3-chloro-4-hydroxyphenyl)-phenylmethanone	C1=CC=C(C=C1)C(=O)C2=CC(=C(C=C2)O)Cl	232.66	Hechao Chen et al.2024
	1707	35350-43-7	1-nitro-2-[(2-nitrophenyl)diselanyl]benzene	C1=CC=C(C(=C1)[N+](=O)[O-])[Se][Se]C2=CC=CC=C2[N+](=O)[O-]	402.1	Hechao Chen et al.2024
	1708	86607-60-5	2,6-dichloro-3-methoxyphenol	COC1=C(C(=C(C=C1)Cl)O)Cl	193.02	Hechao Chen et al.2024
	1709	75-52-5	nitromethane	C[N+](=O)[O-]	61.04	Hechao Chen et al.2024
	1710	2255-17-6	dimethyl (3-methyl-4-nitrophenyl) phosphate	CC1=C(C=CC(=C1)OP(=O)(OC)OC)[N+](=O)[O-]	261.17	Hechao Chen et al.2024
	1711	2581-34-2	3-methyl-4-nitrophenol	CC1=C(C=CC(=C1)O)[N+](=O)[O-]	153.14	Hechao Chen et al.2024
	1712	115872-75-8	(E)-2,4-diphenylbut-2-enal	C1=CC=C(C=C1)CC=C(C=O)C2=CC=CC=C2	222.28	Hechao Chen et al.2024
	1713	92-07-9	3,5-diphenylpyridine	C1=CC=C(C=C1)C2=CC(=CN=C2)C3=CC=CC=C3	231.29	Hechao Chen et al.2024
	1714	157948-52-2	3,4-dichlorofuran-2,5-dicarbaldehyde	C(=O)C1=C(C(=C(O1)C=O)Cl)Cl	192.98	Hechao Chen et al.2024
	1715	13529-17-4	5-formylfuran-2-carboxylic acid	C1=C(OC(=C1)C(=O)O)C=O	140.09	Hechao Chen et al.2024
	1716	586-35-6	2-bromoterephthalic acid	C1=CC(=C(C=C1C(=O)O)Br)C(=O)O	245.03	Hechao Chen et al.2024
	1717	20846-52-0	2-chloroethanimidamide	C(C(=N)N)Cl	92.53	Hechao Chen et al.2024
	1718	747357-91-1	2-bromoethanimidamide	C(C(=N)N)Br	136.98	Hechao Chen et al.2024
	1719	44301-22-6	2,2-dichloroethanimidamide	C(C(=N)N)(Cl)Cl	126.97	Hechao Chen et al.2024
	1720	885959-22-8	2-bromopropanimidamide	CC(C(=N)N)Br	151.01	Hechao Chen et al.2024
	1721	73713-79-8	2,1,3-benzothiadiazole-4-sulfonyl chloride	C1=CC2=NSN=C2C(=C1)S(=O)(=O)Cl	234.7	Hechao Chen et al.2024
	1722	5344-55-8	2,2,3-trichlorobutanoic acid	CC(C(C(=O)O)(Cl)Cl)Cl	191.44	Hechao Chen et al.2024
	1723	34346-68-4	(2,4,6-trichlorophenyl) hydrogen sulfate	C1=C(C=C(C(=C1Cl)OS(=O)(=O)O)Cl)Cl	277.5	Hechao Chen et al.2024
	1724	527-69-5	furan-2-carbonyl chloride	C1=COC(=C1)C(=O)Cl	130.53	Hechao Chen et al.2024
	1725	3967-55-3	4,5-dichloro-1,3-dioxolan-2-one	C1(C(OC(=O)O1)Cl)Cl	156.95	Hechao Chen et al.2024
	1726	67329-11-7	3-chloro-2-(chloromethyl)-2-methylpropanoic acid	CC(CCl)(CCl)C(=O)O	171.02	Hechao Chen et al.2024
	1727	2144-37-8	methyl 5-(chloromethyl)furan-2-carboxylate	COC(=O)C1=CC=C(O1)CCl	174.58	Hechao Chen et al.2024
	1728	93983-14-3	2-chloro-1-(chloromethyl)-3,4-dimethoxybenzene	COC1=C(C(=C(C=C1)CCl)Cl)OC	221.08	Hechao Chen et al.2024
	1729	76341-70-3	2-chloro-4-hydroxy-3,5-dimethoxybenzoic acid	COC1=C(C(=C(C(=C1)C(=O)O)Cl)OC)O	232.62	Hechao Chen et al.2024
	1730	35077-10-2	N,2,2,2-tetrachloroacetamide	C(=O)(C(Cl)(Cl)Cl)NCl	196.8	Hechao Chen et al.2024
	1731	1119-72-8	(2Z,4Z)-hexa-2,4-dienedioic acid	C(=CC(=O)O)C=CC(=O)O	142.11	Hechao Chen et al.2024
	1732	6245-87-0	INDOANILINE	O=C1C=CC(=NC2=CC=C(N)C=C2)C=C1	198.22	Hechao Chen et al.2024
	1733	56052-84-7	1-Methoxy-3-methyl-2-hexene	O(C)CC=C(C)CCC	128.21	Hechao Chen et al.2024
	1734	39254-88-1	2-bromo-2-chloro-Propanedioic acid	O=C(O)C(Cl)(Br)C(=O)O	217.4	Hechao Chen et al.2024
	1735	82179-12-2	Carboniodidic acid	O=C(I)O	171.922	Hechao Chen et al.2024
	1736	59110-13-3	3,3-Diiodo-2-propenoic acid	O=C(O)C=C(I)I	323.86	Hechao Chen et al.2024
	1737	19071-23-9	2-Iodo-2-butenedioic acid	O=C(O)C=C(I)C(=O)O	241.97	Hechao Chen et al.2024
	1738	769146-64-7	(2Z)-2-Iodo-3-methyl-2-butenedioic acid	O=C(O)C(I)=C(C(=O)O)C	255.99	Hechao Chen et al.2024
	1739	234449-87-7	(2Z)-2-Bromo-3-chloro-2-butenedioic acid	O=C(O)C(Cl)=C(Br)C(=O)O	229.41	Hechao Chen et al.2024
	1740	59311-38-5	2-bromo-4-hydroxy-6-methyl-Benzoic acid	O=C(O)C=1C(Br)=CC(O)=CC1C	231.04	Hechao Chen et al.2024
	1741	859783-10-1	4-Bromo-2-chloro-3,5-dimethylphenol	ClC1=C(O)C=C(C(Br)=C1C)C	235.5	Hechao Chen et al.2024
	1742	83385-86-8	2,6-Dibromo-3,5-dimethylphenol	BrC=1C(O)=C(Br)C(=CC1C)C	279.96	Hechao Chen et al.2024
	1743	2091795-08-1	2,6-Dibromo-4-ethoxyphenol	BrC=1C=C(OCC)C=C(Br)C1O	295.96	Hechao Chen et al.2024
	1744	126521-72-0	2,4-Dibromo-6-ethyl-1,3-benzenediol	BrC=1C=C(C(O)=C(Br)C1O)CC	295.96	Hechao Chen et al.2024
	1745	1824289-72-6	3-Amino-2,6-dibromophenol	BrC1=CC=C(N)C(Br)=C1O	266.92	Hechao Chen et al.2024
	1746	1162663-28-6	3-Bromo-4-(dichloromethyl)-5-hydroxy-2(5H)-furanone	O=C1OC(O)C(=C1Br)C(Cl)Cl	261.88	Hechao Chen et al.2024
	1747	848772-87-2	2-Bromo-3,5-dihydroxy-4-methoxybenzoic acid	O=C(O)C1=CC(O)=C(OC)C(O)=C1Br	263.04	Hechao Chen et al.2024
	1748	1567418-28-3	1,1-Dibromo-1-nitromethanol	O=N(=O)C(Br)(Br)O	234.83	Hechao Chen et al.2024
	1749	165545-53-9	4,4,4-Tribromo-1-butanol	BrC(Br)(Br)CCCO	310.81	Hechao Chen et al.2024
	1750	36610-77-2	2-(Dibromomethyl)-2-butenedioic acid	O=C(O)C=C(C(=O)O)C(Br)Br	287.89	Hechao Chen et al.2024
	1751	90801-60-8	(trichloromethyl)-Maleic acid	O=C(O)C=C(C(=O)O)C(Cl)(Cl)Cl	233.43	Hechao Chen et al.2024
	1752	2170105-18-5	2,6-Dibromo-4-dodecyl-3,5-dihydroxybenzenesulfonic acid	O=S(=O)(O)C1=C(Br)C(O)=C(C(O)=C1Br)CCCCCCCCCCCC	516.3	Hechao Chen et al.2024
	1753	750588-63-7	(2E,4Z)-5-Iodo-2,4-hexadienoic acid	O=C(O)C=CC=C(I)C	238.02	Hechao Chen et al.2024
	1754	34239-78-6	Bromomethanesulfonic acid sodium salt	[Na].O=S(=O)(O)CBr	196.99	Hechao Chen et al.2024
	1755	161678-05-3	2-Bromo-5-hydroxy-2,5-cyclohexadiene-1,4-dione	O=C1C=C(O)C(=O)C=C1Br	202.99	Hechao Chen et al.2024
	1756	1395105-04-0	2,5-Dibromo-3,4-furandicarboxylic acid	O=C(O)C1=C(Br)OC(Br)=C1C(=O)O	313.88	Hechao Chen et al.2024
	1757	89283-07-8	3-Bromo-5,6-dichloro-4-hydroxy-2H-pyran-2-one	O=C1OC(Cl)=C(Cl)C(O)=C1Br	259.87	Hechao Chen et al.2024
	1758	66596-91-6	2,6-Dichloro-3,5-dimethoxycyclohexa-2,5-diene-1,4-dione	O=C1C(Cl)=C(OC)C(=O)C(OC)=C1Cl	237.03	Hechao Chen et al.2024
	1759	82-58-6	(8β)-9,10-Didehydro-6-methylergoline-8-carboxylic acid	O=C(O)C1C=C2C=3C=CC=C4NC=C(C43)CC2N(C)C1	268.31	Hechao Chen et al.2024
	1760	123040-69-7	Azasetron	O=C(NC1CN2CCC1CC2)C3=CC(Cl)=CC4=C3OCC(=O)N4C	349.8	Hechao Chen et al.2024
	1761	57659-99-1	1,2,4-Trichloro-1,3-cyclopentadiene	ClC=1C=C(Cl)CC1Cl	169.43	Hechao Chen et al.2024
	1762	3588-17-8	trans-Muconic acid	O=C(O)C=CC=CC(=O)O	142.11	Hechao Chen et al.2024
	1763	23267-57-4	5,6-Epoxy-β-ionone	O=C(C=CC12OC2(C)CCCC1(C)C)C	208.3	Hechao Chen et al.2024
	1764	3598-34-3	4-Chloro-1,2,3-benzenetriol	ClC1=CC=C(O)C(O)=C1O	160.55	Hechao Chen et al.2024
	1765	87441-03-0	4,6-Dichloro-1,2,3-benzenetriol	ClC=1C=C(Cl)C(O)=C(O)C1O	195	Hechao Chen et al.2024
	1766	2953-50-6	cis-1,3,3-Trichloro-1-propene	ClC=CC(Cl)Cl	145.41	Hechao Chen et al.2024
	1767	5729-47-5	4-Oxo-2-pentenal	O=CC=CC(=O)C	98.1	Hechao Chen et al.2024
3-New from artical	1768	13073-27-3	3-chloro-2-hydroxybenzonitrile	C1=CC(=C(C(=C1)Cl)O)C#N	153.56	Shaoyang Hu et al. 2024
Number：19	1769	13589-72-5	5-chloro-2-hydroxybenzonitrile	C1=CC(=C(C=C1Cl)C#N)O	153.56	Shaoyang Hu et al. 2024
	1770	2315-81-3	3-chloro-4-hydroxybenzonitrile	C1=CC(=C(C=C1C#N)Cl)O	153.56	Shaoyang Hu et al. 2024
	1771	13073-28-4	3-bromo-2-hydroxybenzonitrile	C1=CC(=C(C(=C1)Br)O)C#N	198.02	Shaoyang Hu et al. 2024
	1772	40530-18-5	5-bromo-2-hydroxybenzonitrile	C1=CC(=C(C=C1Br)C#N)O	198.02	Shaoyang Hu et al. 2024
	1773	2315-86-8	3-bromo-4-hydroxybenzonitrile	C1=CC(=C(C=C1C#N)Br)O	198.02	Shaoyang Hu et al. 2024
	1774	685103-95-1	5-iodo-2-hydroxybenzonitrile	C1=CC(=C(C=C1I)C#N)O	245.02	Shaoyang Hu et al. 2024
	1775	2296-23-3	3-iodo-4-hydroxybenzonitrile	C1=CC(=C(C=C1C#N)I)O	245.02	Shaoyang Hu et al. 2024
	1776	74115-12-1	5-Chloro-3-pyridinol	C1=C(C=NC=C1Cl)O	129.54	Haiyang Tang et al.2021
	1777	6602-32-0	2-bromo-3-pyridinol	C1=CC(=C(N=C1)Br)O	174	Haiyang Tang et al.2021
	1778	6602-33-1	2,6-dibromo-3-pyridinol	C1=CC(=NC(=C1O)Br)Br	252.89	Haiyang Tang et al.2021
	1779	1196146-82-3	5-bromo-2-chloro-3-pyridinol	C1=C(NC=C(C1=O)Br)Cl	208.44	Haiyang Tang et al.2021
	1780	6602-34-2	2,4,6-tribromo-3-pyridinol	C1=C(C(=C(N=C1Br)Br)O)Br	331.79	Leyi Wang et al.2024
	1781	6636-78-8	2-chloro-3-pyridinol	C1=CC(=C(N=C1)Cl)O	129.54	Leyi Wang et al.2024
	1782	52764-11-1	2,6-dichloro-3-pyridinol	C1=CC(=NC(=C1O)Cl)Cl	163.99	Leyi Wang et al.2024
	1783	58498-59-2	2,4,6-trichloro-3-pyridinol	C1=C(C(=C(N=C1Cl)Cl)O)Cl	198.43	Leyi Wang et al.2024
	1784	580-18-7	3-hydroxyquinoline	C1=CC=C2C(=C1)C=C(C=N2)O	145.16	Bao-Jun Xu et al.2024
	1785	611-36-9	4-hydroxyquinoline	C1=CC=C2C(=C1)C(=O)C=CN2	145.16	Bao-Jun Xu et al.2024
	1786	91-22-5	benzopyridine	C1=CC=C2C(=C1)C=CC=N2	129.16	Bao-Jun Xu et al.2024
4-from Geno data set	1787	7758-01-2	Potassium Bromate	[O-]Br(=O)=O.[K+]	167	Plewa et al. 2002
Number：11	1788	39121-35-2	(E)-3-Bromo-2-Iodopropenoic Acid	C(=C(C(=O)O)I)Br	276.86	Richardson et al. 2008
	1789	957-75-5	5-bromouridine	OC[C@H]1O[C@H]([C@H](O)[C@@H]1O)N1C=C(Br)C(=O)NC1=O	323.1	Guangrong Sun et al.2023
	1790	301-12-2	1-Dimethoxyphosphorylsulfanyl-2-ethylsulfinylethane	CC[S+]([O-])CCSP(=O)(OC)OC	246.3	QSAR toolbox
	1791	94-75-7	(2,4-dichloro-phenoxy)-acetic acid	C1=CC(=C(C=C1Cl)Cl)OCC(=O)O	221.03	QSAR toolbox
	1792	556-52-5	2-Oxiranemethanol	OCC1CO1	74.08	QSAR toolbox
	1793	1918-00-9	3,6-dichloro-2-methoxybenzoic acid	COC1=C(C=CC(=C1C(=O)O)Cl)Cl	221.03	QSAR toolbox
	1794	96-24-2	3-Chloro-1,2-propanediol	OCC(O)CCl	110.54	QSAR toolbox
	1795	7681-11-0	Potassium iodide	[K+].[I-]	166.003	QSAR toolbox
	1796	7758-05-6	Iodic acid	[K+].[O-]I(=O)=O	214.001	QSAR toolbox
	1797	222417-90-5	2,3-diiodo-1,4-benzoquinone	O=C1C=CC(=O)C(I)=C1I	359.89	Moe. Et al. 2016
5-from cyto data set	1798	35077-09-9	N,2,2-Trichloroacetamide	O=C(NCl)C(Cl)Cl	162.4	Plewa et al. 2018
Number：19	1799	6893-02-3	4-Hydroxy-3-Iodophenyl	C1=CC(=C(C=C1OC2=C(C=C(C=C2I)C[C@@H](C(=O)O)N)I)I)O	650.97	Wagner et al. 2017
	1800	70-78-0	3-Iodo-L-tyrosine	NC(Cc1ccc(O)c(I)c1)C(O)=O	307.08	Dayong Tian et al.2020
	1801	300-38-9	3,5-Dibromo-tyrosine	NC(Cc1cc(Br)c(O)c(Br)c1)C(O)=O	338.98	Dayong Tian et al.2020
	1802	66-02-4	3,5-Diiodo-tyrosine	NC(Cc1cc(I)c(O)c(I)c1)C(O)=O	432.98	Dayong Tian et al.2020
	1803	1935918-32-3	2-(2,6-dibromophenyl)acetamide	O=C(N)CC=1C(Br)=CC=CC1Br	292.95	Shaoyang Hu et al.2022
	1804	2766856-31-7	2-(2-bromo-6-chlorophenyl)acetamide	O=C(N)CC=1C(Cl)=CC=CC1Br	248.5	Shaoyang Hu et al.2022
	1805	54788-30-6	3-bromotyrosine	C1=CC(=C(C=C1CC(C(=O)O)N)Br)O	260.08	Dayong Tian et al.2020
	1806	537-24-6	3,5-dibromotyrosine	NC(Cc1cc(Br)c(O)c(Br)c1)C(O)=O	338.98	Shaoyang Hu et al.2022
	1807	300-39-0	3,5-diiodotyrosine	C1=C(C=C(C(=C1I)O)I)C[C@@H](C(=O)O)N	432.98	Shaoyang Hu et al.2022
	1808	35079-24-4	2-idodine-1,4-naphthoquinone	C1=CC=C2C(=C1)C(=O)C=C(C2=O)I	284.05	Hangcheng Jiang et al.2022
	1809	130-15-4	1,4- naphthoquinone	O=C1C=CC(=O)c2ccccc12	158.15	Hangcheng Jiang et al.2022
	1810	90-13-1	1-Chloronaphthalene	C1=CC=C2C(=C1)C=CC=C2Cl	162.61	Hangcheng Jiang et al.2022
	1811	2240-25-7	5-bromocytosine	NC1=NC(=O)NC=C1Br	190	Guangrong Sun et al.2023
	1812	146-77-0	2-chloroadenosine	Nc1nc(Cl)nc2c1ncn2C1OC(CO)C(O)C1O	301.69	Guangrong Sun et al.2023
	1813	2946-39-6	8-bromoadenosine	Nc1ncnc2c1nc(Br)n2[C@@H]1O[C@H](CO)[C@@H](O)[C@H]1O	346.14	Guangrong Sun et al.2023
	1814	4016-63-1	8-bromoguanosine	Nc1nc(O)c2nc(Br)n([C@@H]3O[C@H](CO)[C@@H](O)[C@H]3O)c2n1	362.14	Guangrong Sun et al.2023
	1815	2004-07-1	6-chloroguanosine	C1=NC2=C(N1[C@H]3[C@@H]([C@@H]([C@H](O3)CO)O)O)N=C(N=C2Cl)N	301.69	Guangrong Sun et al.2023
	1816	3066-86-2	5-bromocytidine	C1=C(C(=NC(=O)N1[C@H]2[C@@H]([C@@H]([C@H](O2)CO)O)O)N)Br	322.11	Guangrong Sun et al.2023
Some substances have identical SMILES codes (because they are isomers) but different CAS numbers. We decided to consider them as different DBPs.
Reference articles	Full name
Shuxin Sui et al.2024	Sui, S.; Zhou, N.; Liu, H.; Watson, P.; Yang, X. Recognizing high-priority disinfection byproducts based on experimental and predicted endocrine disrupting data: Virtual screening and in vitro study. Chemosphere 2024, 358, 142239. DOI: 10.1016/j.chemosphere.2024.142239.
Hechao Chen et al.2024	Chen, H.; Xie, J.; Huang, C.; Liang, Y.; Zhang, Y.; Zhao, X.; Ling, Y.; Wang, L.; Zheng, Q.; Yang, X. Database and review of disinfection by-products since 1974: constituent elements, molecular weights, and structures. J. Hazard. Mater. 2024, 462, 132792. DOI: 10.1016/j.jhazmat.2023.132792.
Shaoyang Hu et al. 2024	Hu, S.; Li, X.; Li, G.; Li, Z.; He, F.; Tian, G.; Zhao, X.; Liu, R. New Species and Cytotoxicity Mechanism of Halohydroxybenzonitrile Disinfection Byproducts in Drinking Water. Environ. Sci. Technol. 2024, 58 (35), 15816–15826. DOI: 10.1021/acs.est.4c06163
Haiyang Tang et al.2021	Tang, H.; Zhong, H.; Pan, Y.; Zhou, Q.; Huo, Z.; Chu, W.; Xu, B. A New Group of Heterocyclic Nitrogenous Disinfection Byproducts (DBPs) in Drinking Water: Role of Extraction pH in Unknown DBP Exploration. Environ. Sci. Technol. 2021, 55 (10), 6764–6772. DOI: 10.1021/acs.est.1c00078.
Leyi Wang et al.2024	Wang, L.; Zhong, H.; Chen, X.; Chen, X.; Zhou, Q.; Li, A.; Pan, Y. A group of emerging heterocyclic nitrogenous disinfection byproducts: formation and cytotoxicity of halopyridinols in drinking water. J. Hazard. Mater. 2024, 472, 134569. DOI: 10.1016/j.jhazmat.2024.134569.
Bao-Jun Xu et al.2024	Xu, B.-J.; Lu, Y.; Liu, N.; Chen, Y.; Liu, M.; Wu, Q.-Y.; Du, Y. Increased Toxicity toward Mammalian Cells in the Periodate Oxidation Process of Wastewater: The Overlooked Formation of Noniodinated but Nitrogenous Byproducts. Environ. Sci. Technol. 2024, 58 (50), 22064–22075. DOI: 10.1021/acs.est.4c10187.
Plewa et al. 2002	Plewa, M. J.; Kargalioglu, Y.; Vankerk, D.; Minear, R. A.; Wagner, E. D. Mammalian cell cytotoxicity and genotoxicity analysis of drinking water disinfection by‐products. Environ. Mol. Mutagen. 2002, 40 (2), 134–142. DOI: 10.1002/em.10092
Richardson et al. 2008	Richardson, S. D.; Fasano, F.; Ellington, J. J.; Crumley, F. G.; Buettner, K. M.; Evans, J. J.; Blount, B. C.; Silva, L. K.; Waite, T. J.; Luther, G. W.; McKague, A. B.; Miltner, R. J.; Wagner, E. D.; Plewa, M. J. Occurrence and mammalian cell toxicity of iodinated disinfection byproducts in drinking water. Environ. Sci. Technol. 2008, 42 (22), 8330–8338. DOI: 10.1021/es801169k.
Guangrong Sun et al.2023	Sun, G.; Guo, P.; Kaw, H. Y.; Zhou, M.; Wang, W. Uncovering an emerging group of halogenated nucleobase-derived disinfection byproducts in drinking water: prioritization of the highly cytotoxic 2-chloroadenine. Environ. Sci. Technol. 2023, 57 (23), 8768–8775. DOI: 10.1021/acs.est.3c01484
QSAR toolbox	Dimitrov, S. D.; Diderich, R.; Sobanski, T.; Pavlov, T. S.; Chankov, G. V.; Chapkanov, A. S.; Karakolev, Y. H.; Temelkov, S. G.; Vasilev, R. A.; Gerova, K. D.; Kuseva, C. D.; Todorova, N. D.; Mehmed, A. M.; Rasenberg, M.; Mekenyan, O. G. QSAR toolbox - workflow and major functionalities. SAR QSAR Environ. Res. 2016, 27 (3), 203–219. DOI: 10.1080/1062936X.2015.1136680.
Moe. Et al. 2016	Li, J.; Moe, B.; Vemula, S.; Wang, W.; Li, X.-F. Emerging Disinfection Byproducts, Halobenzoquinones: Effects of Isomeric Structure and Halogen Substitution on Cytotoxicity, Formation of Reactive Oxygen Species, and Genotoxicity. Environ. Sci. Technol. 2016, 50 (13), 6744–6752. DOI: 10.1021/acs.est.5b05585.
Plewa et al. 2018	Vu, T. N.; Kimura, S. Y.; Plewa, M. J.; Richardsond, S. D.; Marinas, B. J. Predominant N-haloacetamide and haloacetonitrile formation in drinking water via the aldehyde reaction pathway. Environ. Sci. Technol. 2019, 53 (2), 850–859. DOI: 10.1021/acs.est.8b02862.
Wagner et al. 2017	Wagner, E. D.; Plewa, M. J. CHO cell cytotoxicity and genotoxicity analyses of disinfection by-products: An updated review. J. Environ. Sci. 2017, 58, 64–76. DOI: 10.1016/j.jes.2017.04.021.
Dayong Tian et al.2020	Tian, D.; Moe, B.; Huang, G.; Jiang, P.; Ling, Z.-C.; Li, X.-F. Cytotoxicity of halogenated tyrosyl compounds, an emerging class of disinfection byproducts. Chem. Res. Toxicol. 2020, 33 (4), 1028–1035. DOI: 10.1021/acs.chemrestox.0c00049.
Shaoyang Hu et al.2022	Hu, S.; Kaw, H. Y.; Zhu, L.; Wang, W. Formation and cytotoxicity of halophenylacetamides: a new group of nitrogenous aromatic halogenated disinfection byproducts in drinking water. Environ. Sci. Technol. 2022, 56 (5), 3181–3192. DOI: 10.1021/acs.est.1c08419.
Hangcheng Jiang et al.2022	Jiang, H.; Kaw, H. Y.; Zhu, L.; Wang, W. Halonaphthoquinones: a group of emerging disinfection byproducts of high toxicity in drinking water. Water Res. 2022, 217, 118421. DOI: 10.1016/j.watres.2022.118421

## Sheet: Table S10
Table S10 Prediction Performance Comparison Between Optimal Genotoxicity Model and QSAR Toolbox Models
DBP Iformation				DBP Name	Chloroacetic Acid	Ethylmethanesulfonate	Trichloronitromethane	Bromochloronitromethane	Bromodichloronitromethane	Dibromochloronitromethane	Iodoacetic Acid	Tribromoacetamide	3,3-Dibromo-4-oxopentanoic acid	2,3-Dibromopropenoic acid	(Z)-3-Bromo-3-Iodopropenoic Acid	(E)-3-Bromo-2-Iodopropenoic Acid	Bromodiiodomethane	Chloroacetaldehyde	Bromoacetaldehyde	Dibromochloroacetaldehyde	Bromoacetonitrile	5-Amino-N1,N3-Bis(1,3-Dihydroxypropan-2-Yl)-2,4,6-Triiodoisophthalamide	N1,N3-Bis(1,3-Dihydroxy-Propan-2-Yl)-2,4,6-Triiodo-5-Nitroisophthalamide	5-bromouracil	(2,4-dichloro-phenoxy)-acetic acid	3-Chloro-1,2-propanediol	2,5-dichloro-1,4-benzoquinone	2,6-dibromo-1,4-benzoquinone
				CASN	79-11-8	62-50-0	76-06-2	135531-25-8	918-01-4	1184-89-0	64-69-7	594-47-8	199744-31-5	24767-86-0	39121-33-0	39121-35-2	557-95-9	107-20-0	17157-48-1	64316-11-6	590-17-0	60166-98-5	1877263-84-7	51-20-7	94-75-7	96-24-2	615-93-0	19643-45-9
				SMILES Code	OC(=O)CCl	CCOS(C)(=O)=O	[O-][N+](=O)C(Cl)(Cl)Cl	C([N+](=O)[O-])(Cl)Br	[O-][N+](=O)C(Cl)(Cl)Br	[O-][N+](=O)C(Cl)(Br)Br	OC(=O)CI	NC(=O)C(Br)(Br)Br	O=C(O)CC(Br)(Br)C(=O)C	C(=C(/C(=O)O)\Br)\Br	OC(=O)C(I)=CBr	C(=C(C(=O)O)I)Br	BrC(I)I	ClCC=O	BrCC=O	C(=O)C(Cl)(Br)Br	BrCC#N	C(C(CO)NC(=O)C1=C(C(=C(C(=C1I)N)I)C(=O)NC(CO)CO)I)O	O=C(NC(CO)CO)C=1C(I)=C(C(=O)NC(CO)CO)C(I)=C(C1I)N(=O)=O	BrC1=CNC(=O)NC1=O	C1=CC(=C(C=C1Cl)Cl)OCC(=O)O	OCC(O)CCl	C1=C(C(=O)C=C(C1=O)Cl)Cl	C1=C(C(=O)C(=CC1=O)Br)Br
				Experimental Genotoxicity	Positive	Positive	Positive	Positive	Positive	Positive	Positive	Positive	Positive	Negative	Negative	Negative	Negative	Positive	Positive	Positive	Positive	Negative	Negative	Positive	Positive	Positive	Positive	Positive
Model Group	Test cell	Test type	Metabolic activation	Model Name	Prediction Genotoxicity																								Prediction	True Prediction	Reference
Chromosome Aberrations in Chinese Hamster Ovary (CHO) Cells	CHO	in Vitro Mammalian Chromosome Aberration Test	With S9	Danish QSAR DB battery model	Out of AD	Out of AD	--	--	--	--	Out of AD	--	--	Out of AD	Out of AD	Out of AD	--	Out of AD	Out of AD	--	Out of AD	--	--	Out of AD	Positive	Out of AD	Out of AD	Out of AD	1	1	QSAR Toolbox
				Danish QSAR DB CASE Ultra model	Negative	Out of AD	--	--	--	--	Out of AD	Out of AD	--	Out of AD	Out of AD	Out of AD	--	Out of AD	Out of AD	--	Out of AD	--	--	Out of AD	Positive	Negative	Out of AD	Out of AD	3	1	QSAR Toolbox
				Danish QSAR DB Leadscope model	Negative	Out of AD	--	--	--	--	Out of AD	Negative	--	Out of AD	Out of AD	Out of AD	--	Negative	Out of AD	--	Out of AD	--	--	Out of AD	Positive	Negative	Out of AD	Out of AD	5	1	QSAR Toolbox
				Danish QSAR DB SciQSAR model	Negative	Out of AD	--	--	--	--	Negative	Negative	--	Out of AD	Out of AD	Out of AD	--	Positive	Negative	--	Negative	--	--	Negative	Positive	Positive	Negative	Out of AD	10	3	QSAR Toolbox
Mutations in HGPRT (Hypoxanthine-guanine phosphoribosyltransferase) Locus in Chinese Hamster Ovary (CHO) Cells	CHO	Mammalian Cell Gene Mutation Assay	With S9	Danish QSAR DB battery model	Out of AD	Positive	--	--	--	--	Out of AD	Out of AD	--	Out of AD	Out of AD	Out of AD	--	Out of AD	Out of AD	--	Out of AD	--	--	Out of AD	Negative	Out of AD	Out of AD	Out of AD	2	1	QSAR Toolbox
				Danish QSAR DB CASE Ultra model	Negative	Positive	--	--	--	--	Negative	Out of AD	--	Out of AD	Out of AD	Out of AD	--	Negative	Out of AD	--	Out of AD	--	--	Out of AD	Negative	Negative	Negative	Out of AD	7	1	QSAR Toolbox
				Danish QSAR DB Leadscope model	Negative	Positive	--	--	--	--	Negative	Out of AD	--	Out of AD	Negative	Negative	--	Negative	Out of AD	--	Out of AD	--	--	Out of AD	Negative	Negative	Negative	Out of AD	9	3	QSAR Toolbox
				Danish QSAR DB SciQSAR model	Negative	Positive	--	--	--	--	Negative	Out of AD	--	Negative	Positive	Positive	--	Negative	Negative	--	Out of AD	--	--	Positive	Negative	Negative	Negative	Negative	13	3	QSAR Toolbox
--	CHO	Single Cell Gel Electrophoresis (comet) Assay	--	RF model	Positive	Positive	Positive	Positive	Positive	Positive	Positive	Positive	Positive	Negative	Negative	Negative	Negative	Positive	Positive	Positive	Positive	Negative	Negative	Positive	Positive	Positive	Positive	Positive	24	24	This Paper

## Sheet: Table S11
Table S11 Tool Prediction Result of Updated Inventory DBPs
Prediction Result of Updated Inventory DBPs Out of Cytotoxicity Data Set									Prediction Result of Updated Inevntory DBPs Out of Genotoxicity Data Set
No.	Name	SMILES	CAS NO	CytToxPre(μM)	CytTox_AD	CytTox_Reliability	MolecularWeight	CyToxPre(mg/L)	No.	Name	SMILES Code	CAS NO	GenToxPre	GenTox_AD	GenTox_Reliability
1	Dimethylamine	N(C)C	124-40-3	4926	Within Euclidean Distance and Leverages	Low reliability	45.08	222.064	1	Dimethylamine	N(C)C	124-40-3	Negative	Within Euclidean Distance and Leverages	Low reliability
2	1,1-Dichloor-1-nitroeithaan	C(N(=O)=O)(C)(Cl)Cl	594-72-9	1075	Within Euclidean Distance and Leverages	Low reliability	143.95	154.746	2	1,1-Dichloor-1-nitroeithaan	C(N(=O)=O)(C)(Cl)Cl	594-72-9	Positive	Within Euclidean Distance and Leverages	Low reliability
3	N,N-Dimethyl-Guanidine	C(=N)(N(C)C)N	6145-42-2	48279	Within Euclidean Distance and Leverages	Low reliability	87.12	4206.07	3	N,N-Dimethyl-Guanidine	C(=N)(N(C)C)N	6145-42-2	Positive	Within Euclidean Distance and Leverages	Low reliability
4	3-Heptanamine, N-​ethyl-​3-​methyl-	C(CCCC)(NCC)(CC)C	89214-90-4	3891	Within Euclidean Distance	Low reliability	157.3	612.054	4	3-Heptanamine, N-​ethyl-​3-​methyl-	C(CCCC)(NCC)(CC)C	89214-90-4	Positive	Within Euclidean Distance and Leverages	Low reliability
5	Chlormethine	N(CCCl)(CCCl)C	51-75-2	55.1	Within Euclidean Distance and Leverages	Low reliability	156.05	8.59836	5	Chlormethine	N(CCCl)(CCCl)C	51-75-2	Positive	Within Euclidean Distance and Leverages	Low reliability
6	N,N-Dimethyldodecylamine	C(CCCCCCCCC)CCN(C)C	112-18-5	5505	Within Euclidean Distance	Low reliability	213.4	1174.77	6	N,N-Dimethyldodecylamine	C(CCCCCCCCC)CCN(C)C	112-18-5	Negative	Within Euclidean Distance and Leverages	Low reliability
7	N-METHYLDODECYLAMINE	C(CCCCCNC)CCCCCC	7311-30-0	3488	Within Euclidean Distance	Low reliability	199.38	695.437	7	N-METHYLDODECYLAMINE	C(CCCCCNC)CCCCCC	7311-30-0	Negative	Within Euclidean Distance and Leverages	Low reliability
8	N-nitrosomethy-lethylamine	N(CC)(N=O)C	10595-95-6	1081	Within Euclidean Distance and Leverages	Low reliability	88.11	95.2469	8	N-nitrosomethy-lethylamine	N(CC)(N=O)C	10595-95-6	Negative	Within Euclidean Distance and Leverages	Low reliability
9	N-nitrosodiethylamine	N(CC)(CC)N=O	55-18-5	1412	Within Euclidean Distance and Leverages	Low reliability	102.14	144.222	9	N-nitrosodiethylamine	N(CC)(CC)N=O	55-18-5	Negative	Within Euclidean Distance and Leverages	Moderate reliability
10	N-Nitrosomethanamine	N(N=O)C	64768-29-2	4469	Within Euclidean Distance and Leverages	Low reliability	60.056	268.39	10	N-Nitrosomethanamine	N(N=O)C	64768-29-2	Positive	Within Euclidean Distance and Leverages	Low reliability
11	N-nitrosodi-n-propyl-amine	N(CCC)(CCC)N=O	621-64-7	629	Within Euclidean Distance and Leverages	Low reliability	130.19	81.8895	11	N-nitrosodi-n-propyl-amine	N(CCC)(CCC)N=O	621-64-7	Negative	Within Euclidean Distance and Leverages	Moderate reliability
12	N-nitrosodi-n-butylamine	N(CCCC)(CCCC)N=O	924-16-3	468	Within Euclidean Distance	Low reliability	158.24	74.0563	12	N-nitrosodi-n-butylamine	N(CCCC)(CCCC)N=O	924-16-3	Negative	Within Euclidean Distance and Leverages	Moderate reliability
13	N-nitrosodimethylamine	N(N=O)(C)C	62-75-9	903	Within Euclidean Distance and Leverages	Low reliability	74.08	66.8942	14	N-nitrosodiethanolamine	N(CCO)(CCO)N=O	1116-54-7	Negative	Within Euclidean Distance and Leverages	Moderate reliability
14	N-nitrosodiethanolamine	N(CCO)(CCO)N=O	1116-54-7	2223	Within Euclidean Distance and Leverages	Moderate reliability	134.13	298.171	15	N-nitrodimethylamine	N(N(=O)=O)(C)C	4164-28-7	Negative	Within Euclidean Distance and Leverages	Moderate reliability
15	N-nitrodimethylamine	N(N(=O)=O)(C)C	4164-28-7	38110	Within Euclidean Distance and Leverages	Low reliability	90.08	3432.95	16	N-nitrodiethanolamine	N(CCON(=O)=O)(CCON(=O)=O)N(=O)=O	4185-47-1	Negative	Within Euclidean Distance and Leverages	Low reliability
17	1-Pentanamine, N-nitro-	C(NN(=O)=O)CCCC	72884-67-4	3720	Within Euclidean Distance and Leverages	Low reliability	132.16	491.635	17	1-Pentanamine, N-nitro-	C(NN(=O)=O)CCCC	72884-67-4	Negative	Within Euclidean Distance and Leverages	Low reliability
18	Isobutyric anhydride	C(=O)(OC(=O)C(C)C)C(C)C	97-72-3	2428	Within Euclidean Distance and Leverages	Low reliability	158.19	384.085	18	Isobutyric anhydride	C(=O)(OC(=O)C(C)C)C(C)C	97-72-3	Positive	Within Euclidean Distance and Leverages	Low reliability
19	2-methylbutyric anhydride	C(=O)(OC(=O)C(CC)C)C(CC)C	1519-23-9	926	Within Euclidean Distance and Leverages	Low reliability	186.25	172.468	19	2-methylbutyric anhydride	C(=O)(OC(=O)C(CC)C)C(CC)C	1519-23-9	Negative	Within Euclidean Distance and Leverages	Low reliability
20	Heptanoyl anhydride	O(C(=O)CCCCCC)C(=O)CCCCCC	626-27-7	595	Within Euclidean Distance	Low reliability	242.35	144.198	20	Heptanoyl anhydride	O(C(=O)CCCCCC)C(=O)CCCCCC	626-27-7	Negative	Within Euclidean Distance and Leverages	Low reliability
21	Hexanoic anhydride	O(C(=O)CCCCC)C(=O)CCCCC	2051-49-2	804	Within Euclidean Distance	Low reliability	214.3	172.297	21	Hexanoic anhydride	O(C(=O)CCCCC)C(=O)CCCCC	2051-49-2	Positive	Within Euclidean Distance and Leverages	Low reliability
22	Acetic anhydride	O(C(=O)C)C(=O)C	108-24-7	5658	Within Euclidean Distance and Leverages	Low reliability	102.09	577.625	22	Acetic anhydride	O(C(=O)C)C(=O)C	108-24-7	Positive	Within Euclidean Distance and Leverages	Low reliability
23	Butyric anhydride	C(=O)(OC(=O)CCC)CCC	106-31-0	2416	Within Euclidean Distance and Leverages	Low reliability	158.19	382.187	23	Butyric anhydride	C(=O)(OC(=O)CCC)CCC	106-31-0	Positive	Within Euclidean Distance and Leverages	Low reliability
24	Propionic anhydride	O(C(=O)CC)C(=O)CC	123-62-6	1077	Within Euclidean Distance and Leverages	Low reliability	130.14	140.161	24	Propionic anhydride	O(C(=O)CC)C(=O)CC	123-62-6	Positive	Within Euclidean Distance and Leverages	Low reliability
25	2-Methylpentanoic anhydride	O(C(=O)C(CCC)C)C(=O)C(CCC)C	63169-61-9	622	Within Euclidean Distance and Leverages	Low reliability	214.3	133.295	25	2-Methylpentanoic anhydride	O(C(=O)C(CCC)C)C(=O)C(CCC)C	63169-61-9	Negative	Within Euclidean Distance and Leverages	Low reliability
26	2-Nitro-1-propanol	C(N(=O)=O)(CO)C	2902-96-7	3863	Within Euclidean Distance and Leverages	Low reliability	105.09	405.963	26	2-Nitro-1-propanol	C(N(=O)=O)(CO)C	2902-96-7	Positive	Within Euclidean Distance and Leverages	Low reliability
27	di-n-Butyldibrmotin	[Sn](CCCC)(CCCC)(Br)Br	996-08-7	173	Within Euclidean Distance	Low reliability	392.75	67.9458	27	di-n-Butyldibrmotin	[Sn](CCCC)(CCCC)(Br)Br	996-08-7	Negative	Within Euclidean Distance and Leverages	Low reliability
28	Tributylbromostannane	[Sn](CCCC)(CCCC)(CCCC)Br	1461-23-0	297	Within Euclidean Distance	Low reliability	369.96	109.878	28	Tributylbromostannane	[Sn](CCCC)(CCCC)(CCCC)Br	1461-23-0	Positive	Within Euclidean Distance and Leverages	Low reliability
29	Tris(2-butoxyethyl) phosphate	P(=O)(OCCOCCCC)(OCCOCCCC)OCCOCCCC	78-51-3	1400	Out of Euclidean Distance and Leverages	Low reliability	398.5	557.9	29	Tris(2-butoxyethyl) phosphate	P(=O)(OCCOCCCC)(OCCOCCCC)OCCOCCCC	78-51-3	Negative	Out of Euclidean Distance and Leverages	Low reliability
30	-	C(=N\C#N)(/N(C)C)\Cl	2089238-10-6	2158	Within Euclidean Distance and Leverages	Low reliability	131.56	283.906	30	-	C(=N\C#N)(/N(C)C)\Cl	2089238-10-6	Negative	Within Euclidean Distance and Leverages	Low reliability
31	4-Azidoheptane	C(CCC)(CCC)N=[N+]=[N-]	27126-22-3	1424	Within Euclidean Distance and Leverages	Low reliability	141.21	201.083	31	4-Azidoheptane	C(CCC)(CCC)N=[N+]=[N-]	27126-22-3	Negative	Within Euclidean Distance and Leverages	Low reliability
32	N-Hydroxy-N,N-dimethyl-1-dodecanaminium	C(CCCCCCCCC)CC[N+](C)(C)O	48069-15-4	2924	Within Euclidean Distance	Low reliability	230.41	673.719	32	N-Hydroxy-N,N-dimethyl-1-dodecanaminium	C(CCCCCCCCC)CC[N+](C)(C)O	48069-15-4	Positive	Within Euclidean Distance and Leverages	Low reliability
33	8-Hexadecyne	C(#CCCCCCCC)CCCCCCC	19781-86-3	1399	Within Euclidean Distance	Low reliability	222.41	311.152	33	8-Hexadecyne	C(#CCCCCCCC)CCCCCCC	19781-86-3	Negative	Within Euclidean Distance and Leverages	Low reliability
34	Dichloroacetate	C(C(=O)[O-])(Cl)Cl	13425-80-4	1888	Within Euclidean Distance and Leverages	Moderate reliability	127.93	241.532	34	Dichloroacetate	C(C(=O)[O-])(Cl)Cl	13425-80-4	Positive	Within Euclidean Distance and Leverages	High reliability
35	Methanesulfonyl chloride	S(=O)(=O)(C)Cl	124-63-0	12085	Within Euclidean Distance and Leverages	Low reliability	114.55	1384.34	35	Methanesulfonyl chloride	S(=O)(=O)(C)Cl	124-63-0	Negative	Within Euclidean Distance and Leverages	Low reliability
36	1-Acetoxy-2-chloroethane	O(C(=O)C)CCCl	542-58-5	209	Within Euclidean Distance and Leverages	Low reliability	122.55	25.6129	36	1-Acetoxy-2-chloroethane	O(C(=O)C)CCCl	542-58-5	Positive	Within Euclidean Distance and Leverages	Low reliability
37	Acetic acid, 2-bromo-​2-​chloro-​, methyl ester	C(=O)(C(Br)Cl)OC	20428-74-4	31.6	Within Euclidean Distance and Leverages	Moderate reliability	187.42	5.92247	37	Acetic acid, 2-bromo-​2-​chloro-​, methyl ester	C(=O)(C(Br)Cl)OC	20428-74-4	Positive	Within Euclidean Distance and Leverages	Moderate reliability
38	Dichloroacetic acid methyl ester	C(=O)(C(Cl)Cl)OC	116-54-1	239	Within Euclidean Distance and Leverages	Low reliability	142.97	34.1698	38	Dichloroacetic acid methyl ester	C(=O)(C(Cl)Cl)OC	116-54-1	Positive	Within Euclidean Distance and Leverages	Moderate reliability
39	Methyl 2,2-Dibromoacetate	C(=O)(C(Br)Br)OC	6482-26-4	14.5	Within Euclidean Distance and Leverages	Moderate reliability	231.87	3.36212	39	Methyl 2,2-Dibromoacetate	C(=O)(C(Br)Br)OC	6482-26-4	Negative	Within Euclidean Distance and Leverages	Moderate reliability
40	2-Butanol, 3-chloro-, acetate, (2R,3R)-rel- (9CI)	[C@H](OC(=O)C)([C@@H](C)Cl)C	54192-20-0	31	Within Euclidean Distance and Leverages	Low reliability	150.6	4.6686	40	2-Butanol, 3-chloro-, acetate, (2R,3R)-rel- (9CI)	[C@H](OC(=O)C)([C@@H](C)Cl)C	54192-20-0	Positive	Within Euclidean Distance and Leverages	Low reliability
50	2-chloro-n-(2-cyanoethyl)-acetamid	C(=O)(NCCC#N)CCl	17756-81-9	136	Within Euclidean Distance and Leverages	Low reliability	146.57	19.9335	50	2-chloro-n-(2-cyanoethyl)-acetamid	C(=O)(NCCC#N)CCl	17756-81-9	Positive	Within Euclidean Distance and Leverages	Low reliability
63	2,3-Dichloropropamide	C(C(=O)N)(CCl)Cl	19433-84-2	244	Within Euclidean Distance and Leverages	Moderate reliability	141.98	34.6431	63	2,3-Dichloropropamide	C(C(=O)N)(CCl)Cl	19433-84-2	Positive	Within Euclidean Distance and Leverages	Moderate reliability
65	Tetrachloroethylene	C(=C(Cl)Cl)(Cl)Cl	127-18-4	1786	Within Euclidean Distance and Leverages	Low reliability	165.8	296.119	65	Tetrachloroethylene	C(=C(Cl)Cl)(Cl)Cl	127-18-4	Negative	Within Euclidean Distance and Leverages	Low reliability
66	Trichloroethylene	C(=CCl)(Cl)Cl	79-01-6	1720	Within Euclidean Distance and Leverages	Low reliability	131.38	225.974	66	Trichloroethylene	C(=CCl)(Cl)Cl	79-01-6	Negative	Within Euclidean Distance and Leverages	Low reliability
67	1,1-dichloro-ethylen	C(=C)(Cl)Cl	75-35-4	294	Within Euclidean Distance and Leverages	Low reliability	96.94	28.5004	67	1,1-dichloro-ethylen	C(=C)(Cl)Cl	75-35-4	Positive	Within Euclidean Distance and Leverages	Low reliability
68	1,2-cis-Dichloroethylene	C(=C\Cl)\Cl	156-59-2	1589	Within Euclidean Distance and Leverages	Low reliability	96.94	154.038	68	1,2-cis-Dichloroethylene	C(=C\Cl)\Cl	156-59-2	Negative	Within Euclidean Distance and Leverages	Low reliability
69	Vinyl chloride	C(=C)Cl	75-01-4	208	Within Euclidean Distance and Leverages	Low reliability	62.5	13	69	Vinyl chloride	C(=C)Cl	75-01-4	Negative	Within Euclidean Distance and Leverages	Low reliability
70	trans-1, 2-Dichloroethylene	C(=C\Cl)/Cl	156-60-5	1589	Within Euclidean Distance and Leverages	Low reliability	96.94	154.038	70	trans-1, 2-Dichloroethylene	C(=C\Cl)/Cl	156-60-5	Negative	Within Euclidean Distance and Leverages	Low reliability
71	3,3,3-Trichloro-2-methyl-1-propene	C(C(=C)C)(Cl)(Cl)Cl	4749-27-3	623	Within Euclidean Distance and Leverages	Low reliability	159.44	99.3311	71	3,3,3-Trichloro-2-methyl-1-propene	C(C(=C)C)(Cl)(Cl)Cl	4749-27-3	Positive	Within Euclidean Distance and Leverages	Low reliability
72	2,4-Dibromo-1-butene	C(C(=C)Br)CBr	55030-57-4	4.21	Within Euclidean Distance and Leverages	Low reliability	213.9	0.900519	72	2,4-Dibromo-1-butene	C(C(=C)Br)CBr	55030-57-4	Positive	Within Euclidean Distance and Leverages	Low reliability
73	Bromochloromethane	C(Br)Cl	74-97-5	102	Within Euclidean Distance and Leverages	Moderate reliability	129.38	13.1968	73	Bromochloromethane	C(Br)Cl	74-97-5	Negative	Within Euclidean Distance and Leverages	Moderate reliability
74	1,1,1-Trichloroethane	C(C)(Cl)(Cl)Cl	71-55-6	116	Within Euclidean Distance and Leverages	Low reliability	133.4	15.4744	74	1,1,1-Trichloroethane	C(C)(Cl)(Cl)Cl	71-55-6	Negative	Within Euclidean Distance and Leverages	Low reliability
75	Tribromochloromethane	C(Br)(Br)(Br)Cl	594-15-0	2646	Within Euclidean Distance and Leverages	Low reliability	287.17	759.852	75	Tribromochloromethane	C(Br)(Br)(Br)Cl	594-15-0	Negative	Within Euclidean Distance and Leverages	Low reliability
76	Dibromomethane	C(Br)Br	74-95-3	197	Within Euclidean Distance and Leverages	Low reliability	173.83	34.2445	76	Dibromomethane	C(Br)Br	74-95-3	Negative	Within Euclidean Distance and Leverages	Low reliability
77	1,1,1-Trichloropropane	C(CC)(Cl)(Cl)Cl	7789-89-1	579	Within Euclidean Distance and Leverages	Low reliability	147.43	85.362	77	1,1,1-Trichloropropane	C(CC)(Cl)(Cl)Cl	7789-89-1	Negative	Within Euclidean Distance and Leverages	Low reliability
78	1,2-Dibromoethane	C(CBr)Br	106-93-4	2.3	Within Euclidean Distance and Leverages	Low reliability	187.86	0.432078	78	1,2-Dibromoethane	C(CBr)Br	106-93-4	Negative	Within Euclidean Distance and Leverages	Low reliability
79	Chloroiodomethane	C(Cl)I	593-71-5	394	Within Euclidean Distance and Leverages	Low reliability	176.38	69.4937	79	Chloroiodomethane	C(Cl)I	593-71-5	Negative	Within Euclidean Distance and Leverages	Moderate reliability
80	Methyl chloride	CCl	74-87-3	537	Within Euclidean Distance and Leverages	Low reliability	50.49	27.1131	80	Methyl chloride	CCl	74-87-3	Negative	Within Euclidean Distance and Leverages	Low reliability
81	1,1-Dichloroethane	C(C)(Cl)Cl	75-34-3	106	Within Euclidean Distance and Leverages	Low reliability	98.96	10.4898	81	1,1-Dichloroethane	C(C)(Cl)Cl	75-34-3	Positive	Within Euclidean Distance and Leverages	Low reliability
82	1,2,3-Trichloropropane	C(CCl)(CCl)Cl	96-18-4	115	Within Euclidean Distance and Leverages	Low reliability	147.43	16.9545	82	1,2,3-Trichloropropane	C(CCl)(CCl)Cl	96-18-4	Positive	Within Euclidean Distance and Leverages	Low reliability
83	1,2-Dibromo-3-chloropropane	C(CBr)(CCl)Br	96-12-8	0.9	Within Euclidean Distance and Leverages	Low reliability	236.33	0.212697	83	1,2-Dibromo-3-chloropropane	C(CBr)(CCl)Br	96-12-8	Positive	Within Euclidean Distance and Leverages	Low reliability
84	1,2-Dichloroethane	C(CCl)Cl	107-06-2	66.3	Within Euclidean Distance and Leverages	Low reliability	98.96	6.56105	84	1,2-Dichloroethane	C(CCl)Cl	107-06-2	Negative	Within Euclidean Distance and Leverages	Low reliability
85	2,3-Dichlorobutane	C(C(C)Cl)(C)Cl	7581-97-7	996	Within Euclidean Distance and Leverages	Low reliability	127.01	126.502	85	2,3-Dichlorobutane	C(C(C)Cl)(C)Cl	7581-97-7	Negative	Within Euclidean Distance and Leverages	Low reliability
86	Diiodomethane	C(I)I	75-11-6	95.4	Within Euclidean Distance and Leverages	Low reliability	267.835	25.5515	86	Diiodomethane	C(I)I	75-11-6	Negative	Within Euclidean Distance and Leverages	Low reliability
87	Ethane, 1,1,1,2-tetrabromo-2-chloro-	C(C(Br)Cl)(Br)(Br)Br	379226-03-6	3.48	Within Euclidean Distance and Leverages	Low reliability	380.1	1.32275	87	Ethane, 1,1,1,2-tetrabromo-2-chloro-	C(C(Br)Cl)(Br)(Br)Br	379226-03-6	Negative	Within Euclidean Distance and Leverages	Low reliability
88	Carbon tetrachloride	C(Cl)(Cl)(Cl)Cl	56-23-5	5944	Within Euclidean Distance and Leverages	Low reliability	153.8	914.187	88	Carbon tetrachloride	C(Cl)(Cl)(Cl)Cl	56-23-5	Negative	Within Euclidean Distance and Leverages	Low reliability
89	1-Chlorooctane	C(CCCC)CCCCl	111-85-3	612	Within Euclidean Distance	Low reliability	148.67	90.986	89	1-Chlorooctane	C(CCCC)CCCCl	111-85-3	Negative	Within Euclidean Distance and Leverages	Low reliability
90	1-Chlorotetradecane	C(CCCCCCC)CCCCCCCl	2425-54-9	842	Within Euclidean Distance	Low reliability	232.83	196.043	90	1-Chlorotetradecane	C(CCCCCCC)CCCCCCCl	2425-54-9	Negative	Within Euclidean Distance and Leverages	Low reliability
91	2-chlorododecane	C(CCCCCC)CCCC(C)Cl	2350-11-0	838	Within Euclidean Distance	Low reliability	204.78	171.606	91	2-chlorododecane	C(CCCCCC)CCCC(C)Cl	2350-11-0	Negative	Within Euclidean Distance and Leverages	Low reliability
92	Hexadecane, 1,16-dichloro-	C(CCCCCCCCCl)CCCCCCCCl	7735-39-9	1497	Out of Euclidean Distance and Leverages	Low reliability	295.3	442.064	92	Hexadecane, 1,16-dichloro-	C(CCCCCCCCCl)CCCCCCCCl	7735-39-9	Negative	Within Leverages	Low reliability
93	1,1,2-Trichloroethane	C(CCl)(Cl)Cl	79-00-5	62.7	Within Euclidean Distance and Leverages	Low reliability	133.4	8.36418	93	1,1,2-Trichloroethane	C(CCl)(Cl)Cl	79-00-5	Negative	Within Euclidean Distance and Leverages	Low reliability
94	1,1,2-Trichlorotrifluoroethane	C(C(Cl)(F)F)(Cl)(Cl)F	76-13-1	8669	Within Euclidean Distance and Leverages	Low reliability	187.37	1624.31	94	1,1,2-Trichlorotrifluoroethane	C(C(Cl)(F)F)(Cl)(Cl)F	76-13-1	Positive	Within Euclidean Distance and Leverages	Low reliability
95	1,1-dibromopropane	C(CC)(Br)Br	598-17-4	1.69	Within Euclidean Distance and Leverages	Low reliability	201.89	0.341194	95	1,1-dibromopropane	C(CC)(Br)Br	598-17-4	Positive	Within Euclidean Distance and Leverages	Low reliability
96	Ethane, 1,2-dibromo-1-chloro-	C(CBr)(Br)Cl	598-20-9	0.804	Within Euclidean Distance and Leverages	Low reliability	222.3	0.178729	96	Ethane, 1,2-dibromo-1-chloro-	C(CBr)(Br)Cl	598-20-9	Positive	Within Euclidean Distance and Leverages	Low reliability
97	1-Bromohexane	C(CCBr)CCC	111-25-1	1.69	Within Euclidean Distance	Low reliability	165.07	0.278968	97	1-Bromohexane	C(CCBr)CCC	111-25-1	Negative	Within Euclidean Distance and Leverages	Low reliability
98	1-Chlorododecane	C(CCCCCC)CCCCCCl	112-52-7	946	Within Euclidean Distance	Low reliability	204.78	193.722	98	1-Chlorododecane	C(CCCCCC)CCCCCCl	112-52-7	Negative	Within Euclidean Distance and Leverages	Low reliability
99	2-Bromobutane	C(CC)(Br)C	78-76-2	5.65	Within Euclidean Distance and Leverages	Low reliability	137.02	0.774163	99	2-Bromobutane	C(CC)(Br)C	78-76-2	Negative	Within Euclidean Distance and Leverages	Low reliability
100	4-chloro-octan	C(CCCC)(CCC)Cl	999-07-5	625	Within Euclidean Distance	Low reliability	148.67	92.9187	100	4-chloro-octan	C(CCCC)(CCC)Cl	999-07-5	Negative	Within Euclidean Distance and Leverages	Low reliability
101	Bromotrichloromethane	C(Br)(Cl)(Cl)Cl	75-62-7	1883	Within Euclidean Distance and Leverages	Low reliability	198.27	373.342	101	Bromotrichloromethane	C(Br)(Cl)(Cl)Cl	75-62-7	Negative	Within Euclidean Distance and Leverages	Low reliability
102	Dibromodichloromethane	C(Br)(Br)(Cl)Cl	594-18-3	2914	Within Euclidean Distance and Leverages	Low reliability	242.72	707.286	102	Dibromodichloromethane	C(Br)(Br)(Cl)Cl	594-18-3	Negative	Within Euclidean Distance and Leverages	Low reliability
103	Hexane,2-bromo-	C(C(Br)C)CCC	3377-86-4	2.16	Within Euclidean Distance and Leverages	Low reliability	165.07	0.356551	103	Hexane,2-bromo-	C(C(Br)C)CCC	3377-86-4	Negative	Within Euclidean Distance and Leverages	Low reliability
104	Pentane,1,1,5,5-tetrachloro-	C(CC(Cl)Cl)CC(Cl)Cl	17655-64-0	93.6	Within Euclidean Distance and Leverages	Low reliability	209.9	19.6466	104	Pentane,1,1,5,5-tetrachloro-	C(CC(Cl)Cl)CC(Cl)Cl	17655-64-0	Positive	Within Euclidean Distance and Leverages	Low reliability
105	1,2-dichloro-2-methylbutane	C(CC)(CCl)(C)Cl	23010-04-0	53.9	Within Euclidean Distance and Leverages	Low reliability	141.04	7.60206	105	1,2-dichloro-2-methylbutane	C(CC)(CCl)(C)Cl	23010-04-0	Positive	Within Euclidean Distance and Leverages	Low reliability
106	Hexachloroethane	C(C(Cl)(Cl)Cl)(Cl)(Cl)Cl	67-72-1	201	Within Euclidean Distance and Leverages	Low reliability	236.7	47.5767	106	Hexachloroethane	C(C(Cl)(Cl)Cl)(Cl)(Cl)Cl	67-72-1	Negative	Within Euclidean Distance and Leverages	Low reliability
107	Undecane, 1-iodo-2-methyl-	C(CCCCCCCC)C(CI)C	73105-67-6	356	Within Euclidean Distance	Low reliability	296.23	105.458	107	Undecane, 1-iodo-2-methyl-	C(CCCCCCCC)C(CI)C	73105-67-6	Positive	Within Euclidean Distance and Leverages	Low reliability
108	1,2,3,4-tetrachloro-butan	C(C(CCl)Cl)(CCl)Cl	3405-32-1	277	Within Euclidean Distance and Leverages	Low reliability	195.9	54.2643	108	1,2,3,4-tetrachloro-butan	C(C(CCl)Cl)(CCl)Cl	3405-32-1	Positive	Within Euclidean Distance and Leverages	Low reliability
109	Butane, 1,1-dichloro-2-methyl-	C(C(Cl)Cl)(CC)C	23010-05-1	38	Within Euclidean Distance and Leverages	Low reliability	141.04	5.35952	109	Butane, 1,1-dichloro-2-methyl-	C(C(Cl)Cl)(CC)C	23010-05-1	Positive	Within Euclidean Distance and Leverages	Low reliability
110	Octane, 3-chloro-	C(CCCCC)(CC)Cl	128399-51-9	611	Within Euclidean Distance	Low reliability	148.67	90.8374	110	Octane, 3-chloro-	C(CCCCC)(CC)Cl	128399-51-9	Negative	Within Euclidean Distance and Leverages	Low reliability
121	1,2dibromopropane	C(CBr)(Br)C	78-75-1	1.98	Within Euclidean Distance and Leverages	Low reliability	201.89	0.399742	115	Tribromomethane	C(Br)(Br)Br	75-25-2	Negative	Within Euclidean Distance and Leverages	Low reliability
122	Methylenechloride	C(Cl)Cl	75-09-2	1038	Within Euclidean Distance and Leverages	Low reliability	84.93	88.1573	116	Chlorodibromomethane	C(Br)(Br)Cl	124-48-1	Negative	Within Euclidean Distance and Leverages	Low reliability
123	1-BroMo-1,1-dichloro-2-propanone	C(C(=O)C)(Br)(Cl)Cl	1751-16-2	12.1	Within Euclidean Distance and Leverages	Low reliability	205.86	2.49091	117	Trichloromethane	C(Cl)(Cl)Cl	67-66-3	Negative	Within Euclidean Distance and Leverages	Moderate reliability
124	1,1,3-Tribromoacetone	C(=O)(C(Br)Br)CBr	3475-39-6	1.52	Within Euclidean Distance and Leverages	Low reliability	294.77	0.44805	118	Bromodichloromethane	C(Br)(Cl)Cl	75-27-4	Negative	Within Euclidean Distance and Leverages	Low reliability
125	Chloroacetone	C(=O)(CCl)C	78-95-5	119	Within Euclidean Distance and Leverages	Low reliability	92.52	11.0099	121	1,2dibromopropane	C(CBr)(Br)C	78-75-1	Positive	Within Euclidean Distance and Leverages	Low reliability
126	1,1,3-Trichloroacetone	C(=O)(C(Cl)Cl)CCl	921-03-9	209	Within Euclidean Distance and Leverages	Low reliability	161.41	33.7347	122	Methylenechloride	C(Cl)Cl	75-09-2	Negative	Within Euclidean Distance and Leverages	Moderate reliability
127	1,1,3-Tribromo-3-chloroacetone	C(=O)(C(Br)Br)C(Br)Cl	55716-01-3	10.5	Within Euclidean Distance and Leverages	Low reliability	329.21	3.4567	123	1-BroMo-1,1-dichloro-2-propanone	C(C(=O)C)(Br)(Cl)Cl	1751-16-2	Positive	Within Euclidean Distance and Leverages	Low reliability
128	1,1-Dibromo-3,3-dichloroacetone	C(=O)(C(Br)Br)C(Cl)Cl	62874-83-3	13.3	Within Euclidean Distance and Leverages	Low reliability	284.76	3.78731	124	1,1,3-Tribromoacetone	C(=O)(C(Br)Br)CBr	3475-39-6	Positive	Within Euclidean Distance and Leverages	Low reliability
129	1,1-Dibromoacetone	C(C(=O)C)(Br)Br	867-54-9	11.7	Within Euclidean Distance and Leverages	Low reliability	215.87	2.52568	125	Chloroacetone	C(=O)(CCl)C	78-95-5	Positive	Within Euclidean Distance and Leverages	Low reliability
130	1,3-Dibromo-1,3-dichloroacetone	C(=O)(C(Br)Cl)C(Br)Cl	62874-84-4	13.3	Within Euclidean Distance and Leverages	Low reliability	284.76	3.78731	126	1,1,3-Trichloroacetone	C(=O)(C(Cl)Cl)CCl	921-03-9	Positive	Within Euclidean Distance and Leverages	Low reliability
131	1-chlorobutane-2,3-dione	C(=O)(C(=O)C)CCl	5559-62-6	335	Within Euclidean Distance and Leverages	Low reliability	120.53	40.3775	127	1,1,3-Tribromo-3-chloroacetone	C(=O)(C(Br)Br)C(Br)Cl	55716-01-3	Positive	Within Euclidean Distance and Leverages	Low reliability
132	2-Butanone, 1,1,1-trichloro-	C(=O)(C(Cl)(Cl)Cl)CC	815-01-0	254	Within Euclidean Distance and Leverages	Low reliability	175.44	44.5618	128	1,1-Dibromo-3,3-dichloroacetone	C(=O)(C(Br)Br)C(Cl)Cl	62874-83-3	Positive	Within Euclidean Distance and Leverages	Low reliability
133	pentachloroacetone	C(=O)(C(Cl)(Cl)Cl)C(Cl)Cl	1768-31-6	505	Within Euclidean Distance and Leverages	Low reliability	230.3	116.302	129	1,1-Dibromoacetone	C(C(=O)C)(Br)Br	867-54-9	Positive	Within Euclidean Distance and Leverages	Low reliability
134	2-Propanone, 1,1,1-tribromo-	C(C(=O)C)(Br)(Br)Br	3770-98-7	4.57	Within Euclidean Distance and Leverages	Low reliability	294.77	1.3471	130	1,3-Dibromo-1,3-dichloroacetone	C(=O)(C(Br)Cl)C(Br)Cl	62874-84-4	Positive	Within Euclidean Distance and Leverages	Low reliability
135	2-Propanone, 1,1-dibromo-3-chloro-	C(=O)(C(Br)Br)CCl	1578-18-3	3.62	Within Euclidean Distance and Leverages	Low reliability	250.31	0.906122	131	1-chlorobutane-2,3-dione	C(=O)(C(=O)C)CCl	5559-62-6	Positive	Within Euclidean Distance and Leverages	Low reliability
136	1-bromo-2-butanon	C(=O)(CBr)CC	816-40-0	3.13	Within Euclidean Distance and Leverages	Low reliability	151	0.47263	132	2-Butanone, 1,1,1-trichloro-	C(=O)(C(Cl)(Cl)Cl)CC	815-01-0	Positive	Within Euclidean Distance and Leverages	Low reliability
137	1-chlorobutan-2-one	C(=O)(CC)CCl	616-27-3	54.4	Within Euclidean Distance and Leverages	Low reliability	106.55	5.79632	133	pentachloroacetone	C(=O)(C(Cl)(Cl)Cl)C(Cl)Cl	1768-31-6	Positive	Within Euclidean Distance and Leverages	Low reliability
138	Tetrachloroacetone	C(=O)(C(Cl)(Cl)Cl)CCl	16995-35-0	476	Within Euclidean Distance and Leverages	Low reliability	195.9	93.2484	134	2-Propanone, 1,1,1-tribromo-	C(C(=O)C)(Br)(Br)Br	3770-98-7	Positive	Within Euclidean Distance and Leverages	Low reliability
139	2-Butanone,1,1-dichloro-	C(=O)(C(Cl)Cl)CC	2648-56-8	58.4	Within Euclidean Distance and Leverages	Low reliability	140.99	8.23382	135	2-Propanone, 1,1-dibromo-3-chloro-	C(=O)(C(Br)Br)CCl	1578-18-3	Positive	Within Euclidean Distance and Leverages	Low reliability
140	3,3-dichlorobutan-2-one	C(C(=O)C)(C)(Cl)Cl	2648-57-9	276	Within Euclidean Distance and Leverages	Low reliability	140.99	38.9132	136	1-bromo-2-butanon	C(=O)(CBr)CC	816-40-0	Positive	Within Euclidean Distance and Leverages	Low reliability
141	2-Pentanone, 5-bromo-	C(C(=O)C)CCBr	3884-71-7	9.88	Within Euclidean Distance and Leverages	Low reliability	165.03	1.6305	137	1-chlorobutan-2-one	C(=O)(CC)CCl	616-27-3	Positive	Within Euclidean Distance and Leverages	Low reliability
142	3-Chloro-2-butanone	C(C(=O)C)(C)Cl	4091-39-8	235	Within Euclidean Distance and Leverages	Low reliability	106.55	25.0392	138	Tetrachloroacetone	C(=O)(C(Cl)(Cl)Cl)CCl	16995-35-0	Positive	Within Euclidean Distance and Leverages	Low reliability
143	2-Propanone, 1,​1,​1,​3,​3-​pentabromo-​3-​chloro-	C(=O)(C(Br)(Br)Br)C(Br)(Br)Cl	23162-65-4	33.7	Within Euclidean Distance and Leverages	Low reliability	487	16.4119	139	2-Butanone,1,1-dichloro-	C(=O)(C(Cl)Cl)CC	2648-56-8	Positive	Within Euclidean Distance and Leverages	Low reliability
144	2-Propanone, 1-bromo-1-chloro-	C(C(=O)C)(Br)Cl	72007-33-1	24.5	Within Euclidean Distance and Leverages	Low reliability	171.42	4.19979	140	3,3-dichlorobutan-2-one	C(C(=O)C)(C)(Cl)Cl	2648-57-9	Positive	Within Euclidean Distance and Leverages	Low reliability
145	3-Pentanone, 2,2-dichloro-	C(=O)(C(C)(Cl)Cl)CC	73651-50-0	320	Within Euclidean Distance and Leverages	Low reliability	155.02	49.6064	141	2-Pentanone, 5-bromo-	C(C(=O)C)CCBr	3884-71-7	Positive	Within Euclidean Distance and Leverages	Low reliability
146	2-Propanone, 1,​1,​1,​3-​tetrabromo-​3-​chloro-	C(=O)(C(Br)(Br)Br)C(Br)Cl	247147-89-3	7.08	Within Euclidean Distance and Leverages	Low reliability	408.11	2.88942	142	3-Chloro-2-butanone	C(C(=O)C)(C)Cl	4091-39-8	Positive	Within Euclidean Distance and Leverages	Low reliability
147	3-bromo-2-butanon	C(C(=O)C)(Br)C	814-75-5	27.4	Within Euclidean Distance and Leverages	Low reliability	151	4.1374	143	2-Propanone, 1,​1,​1,​3,​3-​pentabromo-​3-​chloro-	C(=O)(C(Br)(Br)Br)C(Br)(Br)Cl	23162-65-4	Positive	Within Euclidean Distance and Leverages	Low reliability
148	2-Propanone, 1-bromo-1,3,3-trichloro-	C(=O)(C(Br)Cl)C(Cl)Cl	62874-82-2	21.4	Within Euclidean Distance and Leverages	Low reliability	240.31	5.14263	144	2-Propanone, 1-bromo-1-chloro-	C(C(=O)C)(Br)Cl	72007-33-1	Positive	Within Euclidean Distance and Leverages	Low reliability
149	1,3-dichlorobutan-2-one	C(=O)(C(C)Cl)CCl	16714-77-5	92.4	Within Euclidean Distance and Leverages	Low reliability	140.99	13.0275	145	3-Pentanone, 2,2-dichloro-	C(=O)(C(C)(Cl)Cl)CC	73651-50-0	Positive	Within Euclidean Distance and Leverages	Low reliability
150	2-Butanone, 1,​1,​3-​trichloro-	C(=O)(C(C)Cl)C(Cl)Cl	52945-79-6	246	Within Euclidean Distance and Leverages	Low reliability	175.44	43.1582	146	2-Propanone, 1,​1,​1,​3-​tetrabromo-​3-​chloro-	C(=O)(C(Br)(Br)Br)C(Br)Cl	247147-89-3	Positive	Within Euclidean Distance and Leverages	Low reliability
151	1,3,3-trichlorobutan-2-one	C(=O)(C(C)(Cl)Cl)CCl	64697-38-7	246	Within Euclidean Distance and Leverages	Low reliability	175.44	43.1582	147	3-bromo-2-butanon	C(C(=O)C)(Br)C	814-75-5	Positive	Within Euclidean Distance and Leverages	Low reliability
152	3-Pentanone, 2,​2,​4-​trichloro-	C(=O)(C(C)(Cl)Cl)C(C)Cl	74600-02-5	519	Within Euclidean Distance and Leverages	Low reliability	189.46	98.3297	148	2-Propanone, 1-bromo-1,3,3-trichloro-	C(=O)(C(Br)Cl)C(Cl)Cl	62874-82-2	Positive	Within Euclidean Distance and Leverages	Low reliability
153	3-Buten-2-one, 3-chloro-	C(=C)(C(=O)C)Cl	683-70-5	235	Within Euclidean Distance and Leverages	Low reliability	104.53	24.5646	149	1,3-dichlorobutan-2-one	C(=O)(C(C)Cl)CCl	16714-77-5	Positive	Within Euclidean Distance and Leverages	Low reliability
154	3-Penten-2-one, 3-bromo-4-methyl-	C(=C(C)C)(C(=O)C)Br	5682-80-4	779	Within Euclidean Distance and Leverages	Low reliability	177.04	137.914	150	2-Butanone, 1,​1,​3-​trichloro-	C(=O)(C(C)Cl)C(Cl)Cl	52945-79-6	Positive	Within Euclidean Distance and Leverages	Low reliability
155	3-Methylvaleric acid chloride	C(CC(=O)Cl)(CC)C	51116-72-4	43.1	Within Euclidean Distance and Leverages	Low reliability	134.6	5.80126	151	1,3,3-trichlorobutan-2-one	C(=O)(C(C)(Cl)Cl)CCl	64697-38-7	Positive	Within Euclidean Distance and Leverages	Low reliability
156	Hexachloroacetone	C(=O)(C(Cl)(Cl)Cl)C(Cl)(Cl)Cl	116-16-5	824	Within Euclidean Distance and Leverages	Low reliability	264.7	218.113	152	3-Pentanone, 2,​2,​4-​trichloro-	C(=O)(C(C)(Cl)Cl)C(C)Cl	74600-02-5	Negative	Within Euclidean Distance and Leverages	Low reliability
157	1,1,1-tricloroacetone	C(C(=O)C)(Cl)(Cl)Cl	918-00-3	391	Within Euclidean Distance and Leverages	Low reliability	161.41	63.1113	153	3-Buten-2-one, 3-chloro-	C(=C)(C(=O)C)Cl	683-70-5	Positive	Within Euclidean Distance and Leverages	Low reliability
158	1-1-dichloropropanone	C(=O)(C(Cl)Cl)C	513-88-2	394	Within Euclidean Distance and Leverages	Low reliability	126.97	50.0262	154	3-Penten-2-one, 3-bromo-4-methyl-	C(=C(C)C)(C(=O)C)Br	5682-80-4	Positive	Within Euclidean Distance and Leverages	Low reliability
159	Bromoacetone	C(=O)(CBr)C	598-31-2	3.93	Within Euclidean Distance and Leverages	Low reliability	136.98	0.538331	155	3-Methylvaleric acid chloride	C(CC(=O)Cl)(CC)C	51116-72-4	Negative	Within Euclidean Distance and Leverages	Low reliability
160	1,3-Dichloropropanone	C(=O)(CCl)CCl	534-07-6	241	Within Euclidean Distance and Leverages	Low reliability	126.97	30.5998	156	Hexachloroacetone	C(=O)(C(Cl)(Cl)Cl)C(Cl)(Cl)Cl	116-16-5	Positive	Within Euclidean Distance and Leverages	Low reliability
161	1,1,3,3-Tetrachloropropanone	C(=O)(C(Cl)Cl)C(Cl)Cl	632-21-3	520	Within Euclidean Distance and Leverages	Low reliability	195.9	101.868	157	1,1,1-tricloroacetone	C(C(=O)C)(Cl)(Cl)Cl	918-00-3	Positive	Within Euclidean Distance and Leverages	Low reliability
162	1,1,3,3-Tetrabromopropanone	C(=O)(C(Br)Br)C(Br)Br	22612-89-1	14.3	Within Euclidean Distance and Leverages	Low reliability	373.66	5.34334	158	1-1-dichloropropanone	C(=O)(C(Cl)Cl)C	513-88-2	Positive	Within Euclidean Distance and Leverages	Low reliability
163	3,3-Dichloropropenoic acid	C(=C(Cl)Cl)C(=O)O	1561-20-2	884	Within Euclidean Distance and Leverages	Low reliability	140.95	124.6	159	Bromoacetone	C(=O)(CBr)C	598-31-2	Positive	Within Euclidean Distance and Leverages	Low reliability
164	Triiodoaceticacid	C(C(=O)O)(I)(I)I	594-68-3	121	Within Euclidean Distance and Leverages	Moderate reliability	437.74	52.9665	160	1,3-Dichloropropanone	C(=O)(CCl)CCl	534-07-6	Positive	Within Euclidean Distance and Leverages	Low reliability
165	(E)-2-Chloro-3-(dichloromethyl)butenedioic acid	C(=C(\C(=O)O)/Cl)(\C(Cl)Cl)/C(=O)O	126572-80-3	2345	Within Euclidean Distance and Leverages	Low reliability	233.43	547.393	161	1,1,3,3-Tetrachloropropanone	C(=O)(C(Cl)Cl)C(Cl)Cl	632-21-3	Positive	Within Euclidean Distance and Leverages	Low reliability
166	2,2-Dichloropropionic acid	C(C(=O)O)(C)(Cl)Cl	75-99-0	1078	Within Euclidean Distance and Leverages	Low reliability	142.97	154.122	162	1,1,3,3-Tetrabromopropanone	C(=O)(C(Br)Br)C(Br)Br	22612-89-1	Positive	Within Euclidean Distance and Leverages	Low reliability
167	2-chloro-3-(dichloromethyl)-4-oxobutenoic acid	C(=C(\C(=O)O)/Cl)(\C(Cl)Cl)/C=O	115340-67-5	502	Within Euclidean Distance and Leverages	Low reliability	217.43	109.15	163	3,3-Dichloropropenoic acid	C(=C(Cl)Cl)C(=O)O	1561-20-2	Positive	Within Euclidean Distance and Leverages	Low reliability
168	2-Chloropropionic acid	C(C(=O)O)(C)Cl	598-78-7	1219	Within Euclidean Distance and Leverages	Moderate reliability	108.52	132.286	164	Triiodoaceticacid	C(C(=O)O)(I)(I)I	594-68-3	Positive	Within Euclidean Distance and Leverages	Moderate reliability
169	2-Butenedioic acid, 2,3-dichloro-, (2Z)-	C(=C(\C(=O)O)/Cl)(\C(=O)O)/Cl	608-42-4	11845	Within Euclidean Distance and Leverages	Low reliability	184.96	2190.85	165	(E)-2-Chloro-3-(dichloromethyl)butenedioic acid	C(=C(\C(=O)O)/Cl)(\C(Cl)Cl)/C(=O)O	126572-80-3	Positive	Within Euclidean Distance and Leverages	Low reliability
170	3-Chloropropionic acid	C(C(=O)O)CCl	107-94-8	212	Within Euclidean Distance and Leverages	Low reliability	108.52	23.0062	166	2,2-Dichloropropionic acid	C(C(=O)O)(C)(Cl)Cl	75-99-0	Positive	Within Euclidean Distance and Leverages	Moderate reliability
171	Propanoic acid, 2,2-dibromo-	C(C(=O)O)(Br)(Br)C	594-48-9	98	Within Euclidean Distance and Leverages	Low reliability	231.87	22.7233	167	2-chloro-3-(dichloromethyl)-4-oxobutenoic acid	C(=C(\C(=O)O)/Cl)(\C(Cl)Cl)/C=O	115340-67-5	Positive	Within Euclidean Distance and Leverages	Low reliability
172	(2E)-2,3-dibromo-2-butenedioic acid	C(=C(\C(=O)O)/Br)(/C(=O)O)\Br	608-38-8	4669	Within Euclidean Distance and Leverages	Moderate reliability	273.86	1278.65	168	2-Chloropropionic acid	C(C(=O)O)(C)Cl	598-78-7	Positive	Within Euclidean Distance and Leverages	Moderate reliability
173	2,3-Dibromopropionic acid	C(C(=O)O)(CBr)Br	600-05-5	5.77	Within Euclidean Distance and Leverages	Moderate reliability	231.87	1.33789	169	2-Butenedioic acid, 2,3-dichloro-, (2Z)-	C(=C(\C(=O)O)/Cl)(\C(=O)O)/Cl	608-42-4	Positive	Within Euclidean Distance and Leverages	Low reliability
174	2-Chloro-3-methylbutanoic acid	C(C(C)C)(C(=O)O)Cl	921-08-4	153	Within Euclidean Distance and Leverages	Low reliability	136.58	20.8967	170	3-Chloropropionic acid	C(C(=O)O)CCl	107-94-8	Positive	Within Euclidean Distance and Leverages	Low reliability
175	3,3,3-trichlorolactic acid	C(C(Cl)(Cl)Cl)(C(=O)O)O	599-01-9	1314	Within Euclidean Distance and Leverages	Low reliability	193.41	254.141	171	Propanoic acid, 2,2-dibromo-	C(C(=O)O)(Br)(Br)C	594-48-9	Positive	Within Euclidean Distance and Leverages	Low reliability
176	bromomaleic acid	C(=C\C(=O)O)(\C(=O)O)/Br	584-99-6	1935	Within Euclidean Distance and Leverages	High reliability	194.97	377.267	172	(2E)-2,3-dibromo-2-butenedioic acid	C(=C(\C(=O)O)/Br)(/C(=O)O)\Br	608-38-8	Negative	Within Euclidean Distance and Leverages	Moderate reliability
177	Butanedioic acid, 2,2-dichloro-	C(CC(=O)O)(C(=O)O)(Cl)Cl	15519-38-7	880	Within Euclidean Distance and Leverages	Low reliability	186.97	164.534	173	2,3-Dibromopropionic acid	C(C(=O)O)(CBr)Br	600-05-5	Positive	Within Euclidean Distance and Leverages	Moderate reliability
178	2,2-Dichlorobutanoic acid	C(C(=O)O)(CC)(Cl)Cl	13023-00-2	1157	Within Euclidean Distance and Leverages	Low reliability	156.99	181.637	174	2-Chloro-3-methylbutanoic acid	C(C(C)C)(C(=O)O)Cl	921-08-4	Positive	Within Euclidean Distance and Leverages	Low reliability
179	2-Propenoicacid,2,3,3-trichloro-	C(=C(Cl)Cl)(C(=O)O)Cl	2257-35-4	1439	Within Euclidean Distance and Leverages	Moderate reliability	175.39	252.386	175	3,3,3-trichlorolactic acid	C(C(Cl)(Cl)Cl)(C(=O)O)O	599-01-9	Positive	Within Euclidean Distance and Leverages	Low reliability
180	Pentanoic acid,5,5,5-trichloro-4-oxo-	C(=O)(C(Cl)(Cl)Cl)CCC(=O)O	2903-43-7	124	Within Euclidean Distance and Leverages	Low reliability	219.45	27.2118	176	bromomaleic acid	C(=C\C(=O)O)(\C(=O)O)/Br	584-99-6	Negative	Within Euclidean Distance and Leverages	Low reliability
181	2-Butenedioic acid, 2,​3-​dichloro-​, (2E)​-	C(=C(\C(=O)O)/Cl)(/C(=O)O)\Cl	25144-43-8	11845	Within Euclidean Distance and Leverages	Low reliability	184.96	2190.85	177	Butanedioic acid, 2,2-dichloro-	C(CC(=O)O)(C(=O)O)(Cl)Cl	15519-38-7	Positive	Within Euclidean Distance and Leverages	Low reliability
182	3-chlorolevulinic acid	C(CC(=O)O)(C(=O)C)Cl	77012-53-4	127	Within Euclidean Distance and Leverages	Low reliability	150.56	19.1211	178	2,2-Dichlorobutanoic acid	C(C(=O)O)(CC)(Cl)Cl	13023-00-2	Positive	Within Euclidean Distance and Leverages	Low reliability
183	2-Chloro-3-(dichloromethyl)-2-butenedioic acid	C(=C(\C(=O)O)/Cl)(/C(Cl)Cl)\C(=O)O	126572-79-0	2345	Within Euclidean Distance and Leverages	Low reliability	233.43	547.393	179	2-Propenoicacid,2,3,3-trichloro-	C(=C(Cl)Cl)(C(=O)O)Cl	2257-35-4	Positive	Within Euclidean Distance and Leverages	Moderate reliability
184	Pentanoic acid, 3,3-dichloro-4-oxo-	C(CC(=O)O)(C(=O)C)(Cl)Cl	158551-88-3	129	Within Euclidean Distance and Leverages	Low reliability	185	23.865	180	Pentanoic acid,5,5,5-trichloro-4-oxo-	C(=O)(C(Cl)(Cl)Cl)CCC(=O)O	2903-43-7	Positive	Within Euclidean Distance and Leverages	Moderate reliability
185	2-Propenoic acid, 2-​bromo-​3,​3-​dichloro-	C(=C(Cl)Cl)(C(=O)O)Br	1050447-14-7	1270	Within Euclidean Distance and Leverages	Moderate reliability	219.85	279.209	181	2-Butenedioic acid, 2,​3-​dichloro-​, (2E)​-	C(=C(\C(=O)O)/Cl)(/C(=O)O)\Cl	25144-43-8	Positive	Within Euclidean Distance and Leverages	Low reliability
186	2-Propenoic acid, 3-​bromo-​2,​3-​dichloro-​, (2E)​-	C(=C(\Br)/Cl)(\C(=O)O)/Cl	1050447-15-8	1051	Within Euclidean Distance and Leverages	Low reliability	219.85	231.062	182	3-chlorolevulinic acid	C(CC(=O)O)(C(=O)C)Cl	77012-53-4	Positive	Within Euclidean Distance and Leverages	Moderate reliability
187	2-Propenoic acid, 3-​bromo-​2,​3-​dichloro-​, (2Z)​-	C(=C(\Br)/Cl)(/C(=O)O)\Cl	1050447-16-9	1051	Within Euclidean Distance and Leverages	Low reliability	219.85	231.062	183	2-Chloro-3-(dichloromethyl)-2-butenedioic acid	C(=C(\C(=O)O)/Cl)(/C(Cl)Cl)\C(=O)O	126572-79-0	Positive	Within Euclidean Distance and Leverages	Low reliability
188	(S)-2-Chlorobutanedioic acid	[C@H](CC(=O)O)(C(=O)O)Cl	4198-33-8	804	Within Euclidean Distance and Leverages	Low reliability	152.53	122.634	184	Pentanoic acid, 3,3-dichloro-4-oxo-	C(CC(=O)O)(C(=O)C)(Cl)Cl	158551-88-3	Positive	Within Euclidean Distance and Leverages	Moderate reliability
189	2,3-Dichloropropionic acid	C(C(=O)O)(CCl)Cl	565-64-0	229	Within Euclidean Distance and Leverages	Moderate reliability	142.97	32.7401	185	2-Propenoic acid, 2-​bromo-​3,​3-​dichloro-	C(=C(Cl)Cl)(C(=O)O)Br	1050447-14-7	Negative	Within Euclidean Distance and Leverages	Low reliability
190	2-Bromopropionic acid	C(C(=O)O)(Br)C	598-72-1	578	Within Euclidean Distance and Leverages	Low reliability	152.97	88.4167	186	2-Propenoic acid, 3-​bromo-​2,​3-​dichloro-​, (2E)​-	C(=C(\Br)/Cl)(\C(=O)O)/Cl	1050447-15-8	Negative	Within Euclidean Distance and Leverages	Low reliability
191	2-Propenoic acid, 3-bromo-3-chloro-	C(=C(Br)Cl)C(=O)O	1379403-76-5	294	Within Euclidean Distance and Leverages	Moderate reliability	185.4	54.5076	187	2-Propenoic acid, 3-​bromo-​2,​3-​dichloro-​, (2Z)​-	C(=C(\Br)/Cl)(/C(=O)O)\Cl	1050447-16-9	Negative	Within Euclidean Distance and Leverages	Low reliability
192	2-Propenoic acid, 2-bromo-3-chloro-, (2E)-	C(=C\Cl)(\C(=O)O)/Br	1081832-96-3	142	Within Euclidean Distance and Leverages	Low reliability	185.4	26.3268	188	(S)-2-Chlorobutanedioic acid	[C@H](CC(=O)O)(C(=O)O)Cl	4198-33-8	Positive	Within Euclidean Distance and Leverages	Low reliability
193	(Z)-2,3-Dibromopropenoic acid	C(=C\Br)(/C(=O)O)\Br	24557-10-6	84.5	Within Euclidean Distance and Leverages	Moderate reliability	229.85	19.4223	189	2,3-Dichloropropionic acid	C(C(=O)O)(CCl)Cl	565-64-0	Positive	Within Euclidean Distance and Leverages	Moderate reliability
194	(E)-2,3-Dibromopropenoic acid	C(=C\Br)(\C(=O)O)/Br	1578-72-9	84.5	Within Euclidean Distance and Leverages	Moderate reliability	229.85	19.4223	190	2-Bromopropionic acid	C(C(=O)O)(Br)C	598-72-1	Positive	Within Euclidean Distance and Leverages	Moderate reliability
195	2-Propenoic acid, 3,​3-​dibromo-​2-​chloro-	C(=C(Br)Br)(C(=O)O)Cl	88917-05-9	380	Within Euclidean Distance and Leverages	Moderate reliability	264.3	100.434	191	2-Propenoic acid, 3-bromo-3-chloro-	C(=C(Br)Cl)C(=O)O	1379403-76-5	Positive	Within Euclidean Distance and Leverages	Moderate reliability
196	2-Propenoic acid, 2,​3-​dibromo-​3-​chloro-​, (2E)​-	C(=C(\Br)/Cl)(\C(=O)O)/Br	1403267-32-2	310	Within Euclidean Distance and Leverages	Moderate reliability	264.3	81.933	192	2-Propenoic acid, 2-bromo-3-chloro-, (2E)-	C(=C\Cl)(\C(=O)O)/Br	1081832-96-3	Positive	Within Euclidean Distance and Leverages	Low reliability
197	2-Propenoic acid, 2,​3-​dibromo-​3-​chloro-​, (2Z)​-	C(=C(\Br)/Cl)(/C(=O)O)\Br	1403267-33-3	310	Within Euclidean Distance and Leverages	Moderate reliability	264.3	81.933	193	(Z)-2,3-Dibromopropenoic acid	C(=C\Br)(/C(=O)O)\Br	24557-10-6	Negative	Within Euclidean Distance and Leverages	Moderate reliability
198	(Z)-2-Bromo-2-butenoic acid	C(=C\C)(/C(=O)O)\Br	5405-34-5	147	Within Euclidean Distance and Leverages	High reliability	164.99	24.2535	194	(E)-2,3-Dibromopropenoic acid	C(=C\Br)(\C(=O)O)/Br	1578-72-9	Negative	Within Euclidean Distance and Leverages	Moderate reliability
199	(E)-2-Bromo-2-butenoic acid	C(=C\C)(\C(=O)O)/Br	36297-22-0	147	Within Euclidean Distance and Leverages	High reliability	164.99	24.2535	195	2-Propenoic acid, 3,​3-​dibromo-​2-​chloro-	C(=C(Br)Br)(C(=O)O)Cl	88917-05-9	Negative	Within Euclidean Distance and Leverages	Moderate reliability
200	(2E)-2,3-Dibromo-2-butenoic acid	C(=C(\Br)/C)(\C(=O)O)/Br	24557-17-3	413	Within Euclidean Distance and Leverages	Moderate reliability	243.88	100.722	196	2-Propenoic acid, 2,​3-​dibromo-​3-​chloro-​, (2E)​-	C(=C(\Br)/Cl)(\C(=O)O)/Br	1403267-32-2	Negative	Within Euclidean Distance and Leverages	Low reliability
201	(Z)-2,3-dichloro-4-oxo-but-2-enoic acid	C(=C(C=O)Cl)(C(=O)O)Cl	57697-64-0	2937	Within Euclidean Distance and Leverages	Low reliability	168.96	496.236	197	2-Propenoic acid, 2,​3-​dibromo-​3-​chloro-​, (2Z)​-	C(=C(\Br)/Cl)(/C(=O)O)\Br	1403267-33-3	Negative	Within Euclidean Distance and Leverages	Low reliability
202	2-Butenoic acid, 2,​4,​4-​trichloro-​3-​formyl-	C(=C(C(=O)O)Cl)(C(Cl)Cl)C=O	135679-99-1	502	Within Euclidean Distance and Leverages	Low reliability	217.43	109.15	198	(Z)-2-Bromo-2-butenoic acid	C(=C\C)(/C(=O)O)\Br	5405-34-5	Positive	Within Euclidean Distance and Leverages	Low reliability
203	2-Butenoic acid, 4-​bromo-​2,​4-​dichloro-​3-​formyl-	C(=C(C(=O)O)Cl)(C(Br)Cl)C=O	700365-45-3	140	Within Euclidean Distance and Leverages	Low reliability	261.88	36.6632	199	(E)-2-Bromo-2-butenoic acid	C(=C\C)(\C(=O)O)/Br	36297-22-0	Positive	Within Euclidean Distance and Leverages	Low reliability
204	2-Butenoic acid, 4,​4-​dibromo-​2-​chloro-​3-​formyl-	C(=C(C(=O)O)Cl)(C(Br)Br)C=O	700365-47-5	56.6	Within Euclidean Distance and Leverages	Low reliability	306.33	17.3383	200	(2E)-2,3-Dibromo-2-butenoic acid	C(=C(\Br)/C)(\C(=O)O)/Br	24557-17-3	Positive	Within Euclidean Distance and Leverages	Moderate reliability
205	2-Butenoic acid, 2,​4,​4-​tribromo-​3-​formyl-	C(=C(C(=O)O)Br)(C(Br)Br)C=O	700365-46-4	54	Within Euclidean Distance and Leverages	Moderate reliability	350.79	18.9427	201	(Z)-2,3-dichloro-4-oxo-but-2-enoic acid	C(=C(C=O)Cl)(C(=O)O)Cl	57697-64-0	Positive	Within Euclidean Distance and Leverages	Low reliability
206	2-Pentenoic acid, 2,​3,​5-​trichloro-​4-​oxo-	C(=C(C(=O)O)Cl)(C(=O)CCl)Cl	412034-77-6	232	Within Euclidean Distance and Leverages	Low reliability	217.43	50.4438	202	2-Butenoic acid, 2,​4,​4-​trichloro-​3-​formyl-	C(=C(C(=O)O)Cl)(C(Cl)Cl)C=O	135679-99-1	Positive	Within Euclidean Distance and Leverages	Low reliability
207	2,5-​Cyclohexadiene-​1,​4-​dione, 3,​5-​dichloro-​2-​hydroxy-	C(=C(C(=O)O)Cl)(C(=O)C(Cl)(Cl)Cl)Cl	19359-89-8	916	Within Euclidean Distance and Leverages	Low reliability	286.3	262.251	203	2-Butenoic acid, 4-​bromo-​2,​4-​dichloro-​3-​formyl-	C(=C(C(=O)O)Cl)(C(Br)Cl)C=O	700365-45-3	Positive	Within Euclidean Distance and Leverages	Low reliability
208	2-Pentenoic acid, 3,5,5,5-tetrachloro-2-methyl-4-oxo-	C(=C(C(=O)O)C)(C(=O)C(Cl)(Cl)Cl)Cl	158347-29-6	442	Within Euclidean Distance and Leverages	Low reliability	265.9	117.528	204	2-Butenoic acid, 4,​4-​dibromo-​2-​chloro-​3-​formyl-	C(=C(C(=O)O)Cl)(C(Br)Br)C=O	700365-47-5	Positive	Within Euclidean Distance and Leverages	Low reliability
209	3-Hexenoic acid, 2,2,3,4,6,6,6-heptachloro-5-oxo-	C(=C(C(=O)C(Cl)(Cl)Cl)Cl)(C(C(=O)O)(Cl)Cl)Cl	101205-16-7	1381	Within Euclidean Distance and Leverages	Low reliability	369.2	509.865	205	2-Butenoic acid, 2,​4,​4-​tribromo-​3-​formyl-	C(=C(C(=O)O)Br)(C(Br)Br)C=O	700365-46-4	Positive	Within Euclidean Distance and Leverages	Low reliability
210	Propanedioic acid, 2-(1,3,3,3-tetrachloro-2-oxopropylidene)-	C(=C(C(=O)C(Cl)(Cl)Cl)Cl)(C(=O)O)C(=O)O	101205-15-6	550	Within Euclidean Distance and Leverages	Low reliability	295.9	162.745	206	2-Pentenoic acid, 2,​3,​5-​trichloro-​4-​oxo-	C(=C(C(=O)O)Cl)(C(=O)CCl)Cl	412034-77-6	Positive	Within Euclidean Distance and Leverages	Low reliability
211	2-Bromobutyric acid	C(C(=O)O)(CC)Br	80-58-0	7.11	Within Euclidean Distance and Leverages	Moderate reliability	167	1.18737	207	2,5-​Cyclohexadiene-​1,​4-​dione, 3,​5-​dichloro-​2-​hydroxy-	C(=C(C(=O)O)Cl)(C(=O)C(Cl)(Cl)Cl)Cl	19359-89-8	Positive	Within Euclidean Distance and Leverages	Low reliability
212	4-Bromocrotonic acid	C(=C\CBr)/C(=O)O	13991-36-1	18.8	Within Euclidean Distance and Leverages	Moderate reliability	164.99	3.10181	208	2-Pentenoic acid, 3,5,5,5-tetrachloro-2-methyl-4-oxo-	C(=C(C(=O)O)C)(C(=O)C(Cl)(Cl)Cl)Cl	158347-29-6	Positive	Within Euclidean Distance and Leverages	Low reliability
213	Propanoic acid,3,3-dibromo-	C(C(Br)Br)C(=O)O	5469-80-7	6.49	Within Euclidean Distance and Leverages	Moderate reliability	231.87	1.50484	209	3-Hexenoic acid, 2,2,3,4,6,6,6-heptachloro-5-oxo-	C(=C(C(=O)C(Cl)(Cl)Cl)Cl)(C(C(=O)O)(Cl)Cl)Cl	101205-16-7	Positive	Within Euclidean Distance and Leverages	Low reliability
233	MucochloricAcid	C(=C(\C=O)/Cl)(\C(=O)O)/Cl	87-56-9	2937	Within Euclidean Distance and Leverages	Low reliability	168.96	496.236	210	Propanedioic acid, 2-(1,3,3,3-tetrachloro-2-oxopropylidene)-	C(=C(C(=O)C(Cl)(Cl)Cl)Cl)(C(=O)O)C(=O)O	101205-15-6	Positive	Within Euclidean Distance and Leverages	Low reliability
234	ChlorosuccinicAcid	C(CC(=O)O)(C(=O)O)Cl	16045-92-4	804	Within Euclidean Distance and Leverages	Low reliability	152.53	122.634	211	2-Bromobutyric acid	C(C(=O)O)(CC)Br	80-58-0	Positive	Within Euclidean Distance and Leverages	Low reliability
239	2-Propenal, 2,3-dichloro-	C(=CCl)(C=O)Cl	26910-68-9	928	Within Euclidean Distance and Leverages	Low reliability	124.95	115.954	212	4-Bromocrotonic acid	C(=C\CBr)/C(=O)O	13991-36-1	Positive	Within Euclidean Distance and Leverages	Moderate reliability
240	Propanal, 2-bromo-2-methyl-	C(C=O)(Br)(C)C	13206-46-7	27.4	Within Euclidean Distance and Leverages	Low reliability	151	4.1374	213	Propanoic acid,3,3-dibromo-	C(C(Br)Br)C(=O)O	5469-80-7	Positive	Within Euclidean Distance and Leverages	Moderate reliability
241	2-chloro-2-methylpropionaldehyde	C(C=O)(C)(C)Cl	917-93-1	235	Within Euclidean Distance and Leverages	Low reliability	106.55	25.0392	222	Chloroiodoaceticacid	C(C(=O)O)(Cl)I	53715-09-6	Positive	Within Euclidean Distance and Leverages	Moderate reliability
242	2-chloroacrolein	C(=C)(C=O)Cl	683-51-2	148	Within Euclidean Distance and Leverages	Low reliability	90.51	13.3955	226	Bromodichloroaceticacid	C(C(=O)O)(Br)(Cl)Cl	71133-14-7	Negative	Within Euclidean Distance and Leverages	Moderate reliability
243	Hexanal, 2-chloro-	C(CCCC)(C=O)Cl	762-39-0	105	Within Euclidean Distance and Leverages	Low reliability	134.6	14.133	229	3,3-Dibromopropenoicacid	C(=C(Br)Br)C(=O)O	1578-21-8	Negative	Within Euclidean Distance and Leverages	Moderate reliability
244	Butanal, 4-chloro-​3-​oxo-	C(=O)(CC=O)CCl	232616-51-2	175	Within Euclidean Distance and Leverages	Low reliability	120.53	21.0928	231	2,3,3-Tribromopropenoicacid	C(=C(Br)Br)(C(=O)O)Br	71815-46-8	Positive	Within Euclidean Distance and Leverages	Low reliability
245	2,2-Dichloropropanal	C(C=O)(C)(Cl)Cl	27313-32-2	928	Within Euclidean Distance and Leverages	Moderate reliability	126.97	117.828	233	MucochloricAcid	C(=C(\C=O)/Cl)(\C(=O)O)/Cl	87-56-9	Positive	Within Euclidean Distance and Leverages	Low reliability
246	2,2,3-Trichloropropanal	C(CCl)(C=O)(Cl)Cl	7789-90-4	208	Within Euclidean Distance and Leverages	Moderate reliability	161.41	33.5733	234	ChlorosuccinicAcid	C(CC(=O)O)(C(=O)O)Cl	16045-92-4	Positive	Within Euclidean Distance and Leverages	Low reliability
247	2,2,3-trichlorobutyraldehyde	C(C(C)Cl)(C=O)(Cl)Cl	76-36-8	246	Within Euclidean Distance and Leverages	Low reliability	175.44	43.1582	238	2-Bromo-3-methyl-butenedioicacid	C(=C(\C(=O)O)/C)(/C(=O)O)\Br	23366-89-4	Positive	Within Euclidean Distance and Leverages	Moderate reliability
248	2-bromo-butyraldehyde	C(CC)(C=O)Br	24764-97-4	2.22	Within Euclidean Distance and Leverages	Low reliability	151	0.33522	239	2-Propenal, 2,3-dichloro-	C(=CCl)(C=O)Cl	26910-68-9	Positive	Within Euclidean Distance and Leverages	Low reliability
249	Butanal, 2-iodo-	C(CC)(C=O)I	20175-17-1	4.22	Within Euclidean Distance and Leverages	Low reliability	198	0.83556	240	Propanal, 2-bromo-2-methyl-	C(C=O)(Br)(C)C	13206-46-7	Negative	Within Euclidean Distance and Leverages	Low reliability
250	2-Propenal, 2,3,3-trichloro-	C(=C(Cl)Cl)(C=O)Cl	3787-28-8	580	Within Euclidean Distance and Leverages	Moderate reliability	159.39	92.4462	241	2-chloro-2-methylpropionaldehyde	C(C=O)(C)(C)Cl	917-93-1	Negative	Within Euclidean Distance and Leverages	Low reliability
251	2-Butenal, 2,3-​dichloro-	C(=C(C)Cl)(C=O)Cl	876498-64-5	409	Within Euclidean Distance and Leverages	Low reliability	138.98	56.8428	242	2-chloroacrolein	C(=C)(C=O)Cl	683-51-2	Positive	Within Euclidean Distance and Leverages	Low reliability
252	2-Butenal, 2-bromo-	C(=CC)(C=O)Br	24247-53-8	36	Within Euclidean Distance and Leverages	Low reliability	148.99	5.36364	243	Hexanal, 2-chloro-	C(CCCC)(C=O)Cl	762-39-0	Negative	Within Euclidean Distance and Leverages	Low reliability
253	2,4-​Pentadienal, 2-​bromo-	C(=CC=C)(C=O)Br	72473-88-2	1.6	Within Euclidean Distance and Leverages	Low reliability	161	0.2576	244	Butanal, 4-chloro-​3-​oxo-	C(=O)(CC=O)CCl	232616-51-2	Positive	Within Euclidean Distance and Leverages	Low reliability
254	2-Butenal, 4-​chloro-	C(=CC=O)CCl	24443-10-5	59.3	Within Euclidean Distance and Leverages	Low reliability	104.53	6.19863	245	2,2-Dichloropropanal	C(C=O)(C)(Cl)Cl	27313-32-2	Positive	Within Euclidean Distance and Leverages	Moderate reliability
255	2-Butenedial, 2-​chloro-​3-​methyl-	C(=C(C=O)Cl)(C=O)C	2408402-65-1	72.8	Within Euclidean Distance and Leverages	Low reliability	132.55	9.64964	246	2,2,3-Trichloropropanal	C(CCl)(C=O)(Cl)Cl	7789-90-4	Positive	Within Euclidean Distance and Leverages	Moderate reliability
266	Propane, 1-bromo-3-(chloromethoxy)-	C(CCBr)OCCl	54314-83-9	2.96	Within Euclidean Distance and Leverages	Low reliability	187.46	0.554882	247	2,2,3-trichlorobutyraldehyde	C(C(C)Cl)(C=O)(Cl)Cl	76-36-8	Positive	Within Euclidean Distance and Leverages	Low reliability
267	Ethane, 2-chloro-1-ethoxy-1-methoxy-	C(OCC)(CCl)OC	64362-62-5	35.5	Within Euclidean Distance and Leverages	Low reliability	138.59	4.91995	248	2-bromo-butyraldehyde	C(CC)(C=O)Br	24764-97-4	Positive	Within Euclidean Distance and Leverages	Low reliability
268	1-Propene, 1,1-​dichloro-​3-​(dichloromethoxy)​-​2-​methyl-	C(=C(Cl)Cl)(COC(Cl)Cl)C	153343-41-0	200	Within Euclidean Distance and Leverages	Low reliability	223.9	44.78	249	Butanal, 2-iodo-	C(CC)(C=O)I	20175-17-1	Positive	Within Euclidean Distance and Leverages	Low reliability
269	Chloro(chloromethoxy) methane	O(CCl)CCl	542-88-1	193	Within Euclidean Distance and Leverages	Low reliability	114.96	22.1873	250	2-Propenal, 2,3,3-trichloro-	C(=C(Cl)Cl)(C=O)Cl	3787-28-8	Positive	Within Euclidean Distance and Leverages	Moderate reliability
270	Bis(dichloromethyl) ether	O(C(Cl)Cl)C(Cl)Cl	20524-86-1	250	Within Euclidean Distance and Leverages	Low reliability	183.8	45.95	251	2-Butenal, 2,3-​dichloro-	C(=C(C)Cl)(C=O)Cl	876498-64-5	Positive	Within Euclidean Distance and Leverages	Low reliability
271	2,2-Dichloropropanenitrile	C(C#N)(C)(Cl)Cl	594-40-1	409	Within Euclidean Distance and Leverages	Low reliability	123.97	50.7037	252	2-Butenal, 2-bromo-	C(=CC)(C=O)Br	24247-53-8	Positive	Within Euclidean Distance and Leverages	Low reliability
272	3,4-Dichlorobutyronitrile	C(CC#N)(CCl)Cl	34362-21-5	218	Within Euclidean Distance and Leverages	Low reliability	137.99	30.0818	253	2,4-​Pentadienal, 2-​bromo-	C(=CC=C)(C=O)Br	72473-88-2	Positive	Within Euclidean Distance and Leverages	Low reliability
273	Propanenitrile, 3-bromo-​2,​3-​dichloro-	C(C(Br)Cl)(C#N)Cl	181529-82-8	18.9	Within Euclidean Distance and Leverages	Low reliability	202.86	3.83405	254	2-Butenal, 4-​chloro-	C(=CC=O)CCl	24443-10-5	Negative	Within Euclidean Distance and Leverages	Low reliability
274	5-Chlorovaleronitrile	C(CCCl)CC#N	6280-87-1	18.5	Within Euclidean Distance and Leverages	Low reliability	117.58	2.17523	255	2-Butenedial, 2-​chloro-​3-​methyl-	C(=C(C=O)Cl)(C=O)C	2408402-65-1	Negative	Within Euclidean Distance and Leverages	Low reliability
275	Butanenitrile, 2,2-​dibromo-	C(CC)(C#N)(Br)Br	1360686-37-8	10.1	Within Euclidean Distance and Leverages	Low reliability	226.9	2.29169	266	Propane, 1-bromo-3-(chloromethoxy)-	C(CCBr)OCCl	54314-83-9	Positive	Within Euclidean Distance and Leverages	Low reliability
276	Propanenitrile, 2,2-​dibromo-	C(C#N)(Br)(Br)C	408538-05-6	9.45	Within Euclidean Distance and Leverages	Low reliability	212.87	2.01162	267	Ethane, 2-chloro-1-ethoxy-1-methoxy-	C(OCC)(CCl)OC	64362-62-5	Positive	Within Euclidean Distance and Leverages	Low reliability
277	Diiodoacetonitrile	C(C#N)(I)I	959961-04-7	2.61	Within Euclidean Distance and Leverages	Low reliability	292.84	0.764312	268	1-Propene, 1,1-​dichloro-​3-​(dichloromethoxy)​-​2-​methyl-	C(=C(Cl)Cl)(COC(Cl)Cl)C	153343-41-0	Negative	Within Euclidean Distance and Leverages	Low reliability
288	2,3-Dibromopropionitrile	C(CBr)(C#N)Br	4554-16-9	5.27	Within Euclidean Distance and Leverages	Low reliability	212.87	1.12182	269	Chloro(chloromethoxy) methane	O(CCl)CCl	542-88-1	Negative	Within Euclidean Distance and Leverages	Low reliability
292	3-Bromopropionitrile	C(CBr)C#N	2417-90-5	4.62	Within Euclidean Distance and Leverages	Moderate reliability	133.97	0.618941	270	Bis(dichloromethyl) ether	O(C(Cl)Cl)C(Cl)Cl	20524-86-1	Negative	Within Euclidean Distance and Leverages	Low reliability
293	Ethanesulfonyl chloride	S(=O)(=O)(CC)Cl	594-44-5	4033	Within Euclidean Distance and Leverages	Low reliability	128.58	518.563	271	2,2-Dichloropropanenitrile	C(C#N)(C)(Cl)Cl	594-40-1	Negative	Within Euclidean Distance and Leverages	Low reliability
294	Chloromethanesulfonyl chloride	S(=O)(=O)(CCl)Cl	3518-65-8	1330	Within Euclidean Distance and Leverages	Low reliability	149	198.17	272	3,4-Dichlorobutyronitrile	C(CC#N)(CCl)Cl	34362-21-5	Positive	Within Euclidean Distance and Leverages	Low reliability
295	3-chlorobutan-2-ol	C(C(C)O)(C)Cl	563-84-8	1499	Within Euclidean Distance and Leverages	Low reliability	108.57	162.746	273	Propanenitrile, 3-bromo-​2,​3-​dichloro-	C(C(Br)Cl)(C#N)Cl	181529-82-8	Negative	Within Euclidean Distance and Leverages	Moderate reliability
296	2-Bromoethanol	C(CO)Br	540-51-2	4.86	Within Euclidean Distance and Leverages	Low reliability	124.96	0.607306	274	5-Chlorovaleronitrile	C(CCCl)CC#N	6280-87-1	Negative	Within Euclidean Distance and Leverages	Low reliability
297	Trichloroethanol	C(CO)(Cl)(Cl)Cl	115-20-8	977	Within Euclidean Distance and Leverages	Moderate reliability	149.4	145.964	275	Butanenitrile, 2,2-​dibromo-	C(CC)(C#N)(Br)Br	1360686-37-8	Positive	Within Euclidean Distance and Leverages	Low reliability
298	2,2,2-tribromoethane-1,1-diol	C(C(O)O)(Br)(Br)Br	507-42-6	474	Within Euclidean Distance and Leverages	Low reliability	298.76	141.612	276	Propanenitrile, 2,2-​dibromo-	C(C#N)(Br)(Br)C	408538-05-6	Positive	Within Euclidean Distance and Leverages	Low reliability
299	2-Pentanol, 4,​5-​dichloro-	C(CC(C)O)(CCl)Cl	232616-52-3	87.9	Within Euclidean Distance and Leverages	Low reliability	157.04	13.8038	277	Diiodoacetonitrile	C(C#N)(I)I	959961-04-7	Positive	Within Euclidean Distance and Leverages	Low reliability
300	2-Butanol, 3-chloro-2-methyl-	C(C(C)Cl)(C)(C)O	21326-62-5	130	Within Euclidean Distance and Leverages	Low reliability	122.59	15.9367	288	2,3-Dibromopropionitrile	C(CBr)(C#N)Br	4554-16-9	Positive	Within Euclidean Distance and Leverages	Moderate reliability
302	3-chloro-2,2-dimethyl-1-propanol	C(CCl)(CO)(C)C	13401-56-4	20.9	Within Euclidean Distance and Leverages	Low reliability	122.59	2.56213	290	Cyanogenchloride	C(#N)Cl	506-77-4	Positive	Within Euclidean Distance and Leverages	Low reliability
303	2,3,3-trichloro-2-propenenitrile	C(=C(Cl)Cl)(C#N)Cl	16212-28-5	144	Within Euclidean Distance and Leverages	Moderate reliability	156.39	22.5202	292	3-Bromopropionitrile	C(CBr)C#N	2417-90-5	Positive	Within Euclidean Distance and Leverages	Low reliability
304	2-Butenenitrile, 2,​3,​4-​trichloro-​, (2E)​-	C(=C(\C#N)/Cl)(/CCl)\Cl	181529-83-9	764	Within Euclidean Distance and Leverages	Low reliability	170.42	130.201	293	Ethanesulfonyl chloride	S(=O)(=O)(CC)Cl	594-44-5	Positive	Within Euclidean Distance and Leverages	Low reliability
305	2-Butenenitrile, 2,​3,​4-​trichloro-​, (2Z)​-	C(=C(\C#N)/Cl)(\CCl)/Cl	181529-84-0	764	Within Euclidean Distance and Leverages	Low reliability	170.42	130.201	294	Chloromethanesulfonyl chloride	S(=O)(=O)(CCl)Cl	3518-65-8	Positive	Within Euclidean Distance and Leverages	Low reliability
306	2-Ethylhexyl acetate	C(COC(=O)C)(CCCC)CC	103-09-3	527	Within Euclidean Distance and Leverages	Low reliability	172.26	90.781	295	3-chlorobutan-2-ol	C(C(C)O)(C)Cl	563-84-8	Positive	Within Euclidean Distance and Leverages	Low reliability
307	Dodecyl acrylate	C(COC(=O)C=C)CCCCCCCCCC	2156-97-0	2938	Within Euclidean Distance	Low reliability	240.38	706.236	296	2-Bromoethanol	C(CO)Br	540-51-2	Positive	Within Euclidean Distance and Leverages	Low reliability
308	Dibutyl maleate	C(=O)(/C=C\C(=O)OCCCC)OCCCC	105-76-0	893	Within Euclidean Distance	Low reliability	228.28	203.854	297	Trichloroethanol	C(CO)(Cl)(Cl)Cl	115-20-8	Negative	Within Euclidean Distance and Leverages	Low reliability
309	Diisobutyl maleate	C(=O)(/C=C\C(=O)OCC(C)C)OCC(C)C	14234-82-3	492	Within Euclidean Distance and Leverages	Low reliability	228.28	112.314	298	2,2,2-tribromoethane-1,1-diol	C(C(O)O)(Br)(Br)Br	507-42-6	Positive	Within Euclidean Distance and Leverages	Low reliability
310	Dimethyl sebacate	C(=O)(CCCCCCCCC(=O)OC)OC	106-79-6	2637	Within Euclidean Distance	Low reliability	230.3	607.301	299	2-Pentanol, 4,​5-​dichloro-	C(CC(C)O)(CCl)Cl	232616-52-3	Positive	Within Euclidean Distance and Leverages	Low reliability
311	Dioctyl adipate	C(CCCC(=O)OCCCCCCCC)C(=O)OCCCCCCCC	123-79-5	961	Out of Euclidean Distance and Leverages	Low reliability	370.6	356.147	300	2-Butanol, 3-chloro-2-methyl-	C(C(C)Cl)(C)(C)O	21326-62-5	Negative	Within Euclidean Distance and Leverages	Low reliability
312	Ethyl 2-methylbutyrate	C(=O)(C(CC)C)OCC	7452-79-1	3678	Within Euclidean Distance and Leverages	Low reliability	130.18	478.802	301	ChloralHydrate	C(C(O)O)(Cl)(Cl)Cl	302-17-0	Negative	Within Euclidean Distance and Leverages	Low reliability
313	methyl 5-oxopentanoate	C(=O)(CCCC=O)OC	6026-86-4	2073	Within Euclidean Distance and Leverages	Low reliability	130.14	269.78	302	3-chloro-2,2-dimethyl-1-propanol	C(CCl)(CO)(C)C	13401-56-4	Negative	Within Euclidean Distance and Leverages	Low reliability
314	methyl 6-oxoheptanoate	C(CCCC(=O)C)C(=O)OC	2046-21-1	1049	Within Euclidean Distance and Leverages	Low reliability	158.19	165.941	303	2,3,3-trichloro-2-propenenitrile	C(=C(Cl)Cl)(C#N)Cl	16212-28-5	Positive	Within Euclidean Distance and Leverages	Moderate reliability
315	Methyl heptanoate	C(=O)(CCCCCC)OC	106-73-0	1597	Within Euclidean Distance and Leverages	Low reliability	144.21	230.303	304	2-Butenenitrile, 2,​3,​4-​trichloro-​, (2E)​-	C(=C(\C#N)/Cl)(/CCl)\Cl	181529-83-9	Positive	Within Euclidean Distance and Leverages	Low reliability
316	tert-Butyl acetoacetate	O(C(C)(C)C)C(=O)CC(=O)C	1694-31-1	8210	Within Euclidean Distance and Leverages	Low reliability	158.19	1298.74	305	2-Butenenitrile, 2,​3,​4-​trichloro-​, (2Z)​-	C(=C(\C#N)/Cl)(\CCl)/Cl	181529-84-0	Positive	Within Euclidean Distance and Leverages	Low reliability
317	10-Undecynoic acid, methyl ester	C(CCC(=O)OC)CCCCCC#C	2777-66-4	2970	Within Euclidean Distance	Low reliability	196.29	582.981	306	2-Ethylhexyl acetate	C(COC(=O)C)(CCCC)CC	103-09-3	Positive	Within Euclidean Distance and Leverages	Low reliability
318	4-Decenoic acid methyl ester	C(CC=CCCCCC)C(=O)OC	1191-02-2	1565	Within Euclidean Distance	Low reliability	184.27	288.383	307	Dodecyl acrylate	C(COC(=O)C=C)CCCCCCCCCC	2156-97-0	Negative	Within Euclidean Distance and Leverages	Low reliability
319	4-Oxodecanoic acid methyl ester	C(=O)(CCC(=O)OC)CCCCCC	7011-82-7	4861	Within Euclidean Distance	Low reliability	200.27	973.512	308	Dibutyl maleate	C(=O)(/C=C\C(=O)OCCCC)OCCCC	105-76-0	Negative	Within Euclidean Distance and Leverages	Low reliability
320	9-Ketocapric acid methyl ester	C(=O)(CCCCCCCC(=O)C)OC	2575-07-7	2740	Within Euclidean Distance	Low reliability	200.27	548.74	309	Diisobutyl maleate	C(=O)(/C=C\C(=O)OCC(C)C)OCC(C)C	14234-82-3	Negative	Within Euclidean Distance and Leverages	Low reliability
321	9-Ketononanoic acid methyl ester	C(CCCCCCC=O)C(=O)OC	1931-63-1	5146	Within Euclidean Distance	Low reliability	186.25	958.442	310	Dimethyl sebacate	C(=O)(CCCCCCCCC(=O)OC)OC	106-79-6	Positive	Within Euclidean Distance and Leverages	Low reliability
322	Allyl 3-methylbutanoate	C(C(=O)OCC=C)C(C)C	2835-39-4	2209	Within Euclidean Distance and Leverages	Low reliability	142.2	314.12	311	Dioctyl adipate	C(CCCC(=O)OCCCCCCCC)C(=O)OCCCCCCCC	123-79-5	Negative	Out of Euclidean Distance and Leverages	Low reliability
323	Caprylic acid methyl ester	C(CC(=O)OC)CCCCC	111-11-5	1495	Within Euclidean Distance	Low reliability	158.24	236.569	312	Ethyl 2-methylbutyrate	C(=O)(C(CC)C)OCC	7452-79-1	Negative	Within Euclidean Distance and Leverages	Low reliability
324	Dimethyl azelate	C(=O)(CCCCCCCC(=O)OC)OC	1732-10-1	3066	Within Euclidean Distance	Low reliability	216.27	663.084	313	methyl 5-oxopentanoate	C(=O)(CCCC=O)OC	6026-86-4	Positive	Within Euclidean Distance and Leverages	Low reliability
325	Ethyl butyrate	C(=O)(CCC)OCC	105-54-4	2186	Within Euclidean Distance and Leverages	Low reliability	116.16	253.926	314	methyl 6-oxoheptanoate	C(CCCC(=O)C)C(=O)OC	2046-21-1	Positive	Within Euclidean Distance and Leverages	Low reliability
326	Ethyl valerate	C(=O)(CCCC)OCC	539-82-2	1553	Within Euclidean Distance and Leverages	Low reliability	130.18	202.17	315	Methyl heptanoate	C(=O)(CCCCCC)OC	106-73-0	Positive	Within Euclidean Distance and Leverages	Low reliability
327	Hendecanedioic acid dimethyl ester	C(=O)(CCCCCCCCCC(=O)OC)OC	4567-98-0	2664	Within Euclidean Distance	Low reliability	244.33	650.895	316	tert-Butyl acetoacetate	O(C(C)(C)C)C(=O)CC(=O)C	1694-31-1	Positive	Within Euclidean Distance and Leverages	Low reliability
328	hexyl pivalate	C(=O)(OCCCCCC)C(C)(C)C	5434-57-1	4053	Within Euclidean Distance and Leverages	Low reliability	186.29	755.033	317	10-Undecynoic acid, methyl ester	C(CCC(=O)OC)CCCCCC#C	2777-66-4	Negative	Within Euclidean Distance and Leverages	Low reliability
329	methyl 8-oxooctanoate	C(CCC(=O)OC)CCCC=O	3884-92-2	1888	Within Euclidean Distance	Low reliability	172.22	325.151	318	4-Decenoic acid methyl ester	C(CC=CCCCCC)C(=O)OC	1191-02-2	Positive	Within Euclidean Distance and Leverages	Low reliability
330	Methyl valerianate	C(=O)(CCCC)OC	624-24-8	796	Within Euclidean Distance and Leverages	Low reliability	116.16	92.4634	319	4-Oxodecanoic acid methyl ester	C(=O)(CCC(=O)OC)CCCCCC	7011-82-7	Positive	Within Euclidean Distance and Leverages	Low reliability
331	Methyl-7-oxooctanoate	C(CCC(=O)OC)CCC(=O)C	16493-42-8	9957	Within Euclidean Distance and Leverages	Low reliability	172.22	1714.79	320	9-Ketocapric acid methyl ester	C(=O)(CCCCCCCC(=O)C)OC	2575-07-7	Positive	Within Euclidean Distance and Leverages	Low reliability
332	Propanoic acid, 2,2-dimethyl-, propyl ester_x000D_	C(=O)(C(C)(C)C)OCCC	5129-35-1	2180	Within Euclidean Distance and Leverages	Low reliability	144.21	314.378	321	9-Ketononanoic acid methyl ester	C(CCCCCCC=O)C(=O)OC	1931-63-1	Negative	Within Euclidean Distance and Leverages	Low reliability
333	Tributyl citrate	C(CC(=O)OCCCC)(CC(=O)OCCCC)(C(=O)OCCCC)O	77-94-1	725	Out of Euclidean Distance and Leverages	Low reliability	360.4	261.29	322	Allyl 3-methylbutanoate	C(C(=O)OCC=C)C(C)C	2835-39-4	Negative	Within Euclidean Distance and Leverages	Low reliability
334	Vinyl Pivalate	C(=O)(C(C)(C)C)OC=C	3377-92-2	1160	Within Euclidean Distance and Leverages	Low reliability	128.17	148.677	323	Caprylic acid methyl ester	C(CC(=O)OC)CCCCC	111-11-5	Negative	Within Euclidean Distance and Leverages	Low reliability
335	tert-butyl octaneperoxoate	C(=O)(OOC(C)(C)C)CCCCCCC	13467-82-8	622	Within Euclidean Distance and Leverages	Low reliability	216.32	134.551	324	Dimethyl azelate	C(=O)(CCCCCCCC(=O)OC)OC	1732-10-1	Positive	Within Euclidean Distance and Leverages	Low reliability
336	1-methylhexyl acetate	C(C(OC(=O)C)C)CCCC	5921-82-4	3206	Within Euclidean Distance and Leverages	Low reliability	158.24	507.317	325	Ethyl butyrate	C(=O)(CCC)OCC	105-54-4	Positive	Within Euclidean Distance and Leverages	Low reliability
337	Butanedioic acid, 2-hydroxy-​2-​methyl-​, 1,​4-​dimethyl ester, (2R)​-	[C@@](CC(=O)OC)(C(=O)OC)(C)O	81426-68-8	5085	Within Euclidean Distance and Leverages	Low reliability	176.17	895.824	326	Ethyl valerate	C(=O)(CCCC)OCC	539-82-2	Positive	Within Euclidean Distance and Leverages	Low reliability
338	Dodecyl 3-sulfanylpropanoate	C(CCCCCCCCCCC)OC(=O)CCS	6380-71-8	751	Within Euclidean Distance	Low reliability	274.5	206.149	327	Hendecanedioic acid dimethyl ester	C(=O)(CCCCCCCCCC(=O)OC)OC	4567-98-0	Negative	Within Euclidean Distance and Leverages	Low reliability
339	n-Decyl propanoate	C(COC(=O)CC)CCCCCCCC	5454-19-3	3304	Within Euclidean Distance	Low reliability	214.34	708.179	328	hexyl pivalate	C(=O)(OCCCCCC)C(C)(C)C	5434-57-1	Negative	Within Euclidean Distance and Leverages	Low reliability
340	tert-Butyl forMate	O(C(C)(C)C)C=O	762-75-4	195	Within Euclidean Distance and Leverages	Low reliability	102.13	19.9154	329	methyl 8-oxooctanoate	C(CCC(=O)OC)CCCC=O	3884-92-2	Negative	Within Euclidean Distance and Leverages	Low reliability
341	hexanoicacid,6-(acetyloxy)-,ethyl	C(CCCCOC(=O)C)C(=O)OCC	104986-28-9	3425	Within Euclidean Distance	Low reliability	202.25	692.706	330	Methyl valerianate	C(=O)(CCCC)OC	624-24-8	Positive	Within Euclidean Distance and Leverages	Low reliability
342	Ethyl propionate	C(=O)(OCC)CC	105-37-3	687	Within Euclidean Distance and Leverages	Low reliability	102.13	70.1633	331	Methyl-7-oxooctanoate	C(CCC(=O)OC)CCC(=O)C	16493-42-8	Positive	Within Euclidean Distance and Leverages	Low reliability
343	11-Dodecenoic acid, methyl ester	C(CCC(=O)OC)CCCCCCC=C	29972-79-0	3767	Within Euclidean Distance	Low reliability	212.33	799.847	332	Propanoic acid, 2,2-dimethyl-, propyl ester_x000D_	C(=O)(C(C)(C)C)OCCC	5129-35-1	Positive	Within Euclidean Distance and Leverages	Low reliability
344	3-Hydroxy Myristic Acid Methyl Ester	C(CCCCCCCCCCC)(CC(=O)OC)O	55682-83-2	2327	Within Euclidean Distance	Low reliability	258.4	601.297	333	Tributyl citrate	C(CC(=O)OCCCC)(CC(=O)OCCCC)(C(=O)OCCCC)O	77-94-1	Negative	Out of Euclidean Distance and Leverages	Low reliability
345	Methyl undecylenate	C(CCC(=O)OC)CCCCCC=C	111-81-9	3187	Within Euclidean Distance	Low reliability	198.3	631.982	334	Vinyl Pivalate	C(=O)(C(C)(C)C)OC=C	3377-92-2	Positive	Within Euclidean Distance and Leverages	Low reliability
346	3-Pentenoic acid, 5-methoxy-, methyl ester	C(=O)(CC=CCOC)OC	58185-66-3	659	Within Euclidean Distance and Leverages	Low reliability	144.17	95.008	335	tert-butyl octaneperoxoate	C(=O)(OOC(C)(C)C)CCCCCCC	13467-82-8	Positive	Within Euclidean Distance and Leverages	Low reliability
347	7-Nonenoic acid methyl ester	C(CCC(=O)OC)CCC=CC	20731-22-0	2649	Within Euclidean Distance	Low reliability	170.25	450.992	336	1-methylhexyl acetate	C(C(OC(=O)C)C)CCCC	5921-82-4	Positive	Within Euclidean Distance and Leverages	Low reliability
348	8-Nonenoic acid methyl ester	C(CCC(=O)OC)CCCC=C	20731-23-1	2754	Within Euclidean Distance	Low reliability	170.25	468.868	337	Butanedioic acid, 2-hydroxy-​2-​methyl-​, 1,​4-​dimethyl ester, (2R)​-	[C@@](CC(=O)OC)(C(=O)OC)(C)O	81426-68-8	Positive	Within Euclidean Distance and Leverages	Low reliability
349	4-Octenoic acid, 8-oxo-, methyl ester, (Z)-	C(=C\CCC=O)\CCC(=O)OC	82302-70-3	3257	Within Euclidean Distance and Leverages	Low reliability	170.21	554.374	338	Dodecyl 3-sulfanylpropanoate	C(CCCCCCCCCCC)OC(=O)CCS	6380-71-8	Negative	Within Euclidean Distance and Leverages	Low reliability
350	methyl (Z)-oct-4-enoate	C(CC(=O)OC)/C=C\CCC	21063-71-8	1479	Within Euclidean Distance and Leverages	Low reliability	156.22	231.049	339	n-Decyl propanoate	C(COC(=O)CC)CCCCCCCC	5454-19-3	Negative	Within Euclidean Distance and Leverages	Low reliability
351	methyl (E)-2-decenoate	C(=C\CCCCCCC)/C(=O)OC	7367-85-3	5628	Within Euclidean Distance	Low reliability	184.27	1037.07	340	tert-Butyl forMate	O(C(C)(C)C)C=O	762-75-4	Negative	Within Euclidean Distance and Leverages	Low reliability
352	13-Tetradecynoic acid methyl ester	C(CCC(=O)OC)CCCCCCCCC#C	56909-03-6	2938	Within Euclidean Distance	Low reliability	238.37	700.331	341	hexanoicacid,6-(acetyloxy)-,ethyl	C(CCCCOC(=O)C)C(=O)OCC	104986-28-9	Positive	Within Euclidean Distance and Leverages	Low reliability
353	8-Hydroxyoctanoic acid methyl ester	C(CCC(=O)OC)CCCCO	20257-95-8	2422	Within Euclidean Distance	Low reliability	174.24	422.009	342	Ethyl propionate	C(=O)(OCC)CC	105-37-3	Positive	Within Euclidean Distance and Leverages	Low reliability
354	(Z)-3-Octenoic acid methyl ester	C(=C\CCCC)\CC(=O)OC	69668-85-5	500	Within Euclidean Distance and Leverages	Low reliability	156.22	78.11	343	11-Dodecenoic acid, methyl ester	C(CCC(=O)OC)CCCCCCC=C	29972-79-0	Negative	Within Euclidean Distance and Leverages	Low reliability
355	17-Octadecynoic acid, methyl ester	C(CCCCCCCCCCC#C)CCCCC(=O)OC	68950-90-3	1385	Out of Euclidean Distance and Leverages	Low reliability	294.5	407.882	344	3-Hydroxy Myristic Acid Methyl Ester	C(CCCCCCCCCCC)(CC(=O)OC)O	55682-83-2	Negative	Within Euclidean Distance and Leverages	Low reliability
356	Propanoic acid, 2-hydroxy-​, 2-​methylpropyl ester, (2R)​-	C(=O)(OCC(C)C)[C@@H](C)O	61597-96-4	1841	Within Euclidean Distance and Leverages	Low reliability	146.18	269.117	345	Methyl undecylenate	C(CCC(=O)OC)CCCCCC=C	111-81-9	Negative	Within Euclidean Distance and Leverages	Low reliability
357	Butanoic acid, 3-methyl-​, 2-​methoxyethyl ester	O(C(=O)CC(C)C)CCOC	98560-79-3	3064	Within Euclidean Distance and Leverages	Low reliability	160.21	490.883	346	3-Pentenoic acid, 5-methoxy-, methyl ester	C(=O)(CC=CCOC)OC	58185-66-3	Positive	Within Euclidean Distance and Leverages	Low reliability
358	Dodecanoic acid, 2-hexen-​1-​yl ester	C(=O)(CCCCCCCCCCC)OCC=CCCC	1199263-93-8	396	Out of Euclidean Distance and Leverages	Low reliability	282.5	111.87	347	7-Nonenoic acid methyl ester	C(CCC(=O)OC)CCC=CC	20731-22-0	Positive	Within Euclidean Distance and Leverages	Low reliability
359	Acetic acid, 2-methoxy-​, 1-​ethylundecyl ester	C(OC(=O)COC)(CCCCCCCCCC)CC	361149-11-3	520	Within Euclidean Distance	Low reliability	272.42	141.658	348	8-Nonenoic acid methyl ester	C(CCC(=O)OC)CCCC=C	20731-23-1	Positive	Within Euclidean Distance and Leverages	Low reliability
360	Isoamyl acetate	C(CC(C)C)OC(=O)C	123-92-2	1257	Within Euclidean Distance and Leverages	Low reliability	130.18	163.636	349	4-Octenoic acid, 8-oxo-, methyl ester, (Z)-	C(=C\CCC=O)\CCC(=O)OC	82302-70-3	Positive	Within Euclidean Distance and Leverages	Low reliability
361	N-(1-Cyano-1-methylethyl)isobutyramide	C(NC(=O)C(C)C)(C#N)(C)C	84213-57-0	2866	Within Euclidean Distance and Leverages	Low reliability	154.21	441.966	350	methyl (Z)-oct-4-enoate	C(CC(=O)OC)/C=C\CCC	21063-71-8	Positive	Within Euclidean Distance and Leverages	Low reliability
362	Pentanamide	C(C(=O)N)CCC	626-97-1	535	Within Euclidean Distance and Leverages	Low reliability	101.15	54.1153	351	methyl (E)-2-decenoate	C(=C\CCCCCCC)/C(=O)OC	7367-85-3	Negative	Within Euclidean Distance and Leverages	Low reliability
363	N,N-Dibutylformamide	N(CCCC)(CCCC)C=O	761-65-9	1183	Within Euclidean Distance	Low reliability	157.25	186.027	352	13-Tetradecynoic acid methyl ester	C(CCC(=O)OC)CCCCCCCCC#C	56909-03-6	Negative	Within Euclidean Distance and Leverages	Low reliability
364	N,N-Diethylformamide	N(CC)(CC)C=O	617-84-5	625	Within Euclidean Distance and Leverages	Low reliability	101.15	63.2188	353	8-Hydroxyoctanoic acid methyl ester	C(CCC(=O)OC)CCCCO	20257-95-8	Negative	Within Euclidean Distance and Leverages	Low reliability
365	N-Butylformamide	C(CCC)NC=O	871-71-6	420	Within Euclidean Distance and Leverages	Low reliability	101.15	42.483	354	(Z)-3-Octenoic acid methyl ester	C(=C\CCCC)\CC(=O)OC	69668-85-5	Positive	Within Euclidean Distance and Leverages	Low reliability
366	n-ethyl-formamid	N(CC)C=O	627-45-2	340	Within Euclidean Distance and Leverages	Low reliability	73.09	24.8506	355	17-Octadecynoic acid, methyl ester	C(CCCCCCCCCCC#C)CCCCC(=O)OC	68950-90-3	Negative	Out of Euclidean Distance and Leverages	Low reliability
367	N-Hexylbutyramide	C(=O)(NCCCCCC)CCC	10264-17-2	2608	Within Euclidean Distance	Low reliability	171.28	446.698	356	Propanoic acid, 2-hydroxy-​, 2-​methylpropyl ester, (2R)​-	C(=O)(OCC(C)C)[C@@H](C)O	61597-96-4	Negative	Within Euclidean Distance and Leverages	Low reliability
368	2-Amino-2-cyanoacetamide	C(C(=O)N)(C#N)N	6719-21-7	7958	Within Euclidean Distance and Leverages	Low reliability	99.09	788.558	357	Butanoic acid, 3-methyl-​, 2-​methoxyethyl ester	O(C(=O)CC(C)C)CCOC	98560-79-3	Positive	Within Euclidean Distance and Leverages	Low reliability
369	Propionamide	C(=O)(CC)N	79-05-0	4087	Within Euclidean Distance and Leverages	Moderate reliability	73.09	298.719	358	Dodecanoic acid, 2-hexen-​1-​yl ester	C(=O)(CCCCCCCCCCC)OCC=CCCC	1199263-93-8	Negative	Out of Euclidean Distance and Leverages	Low reliability
370	Valeric Acid Hydrazine	C(=O)(CCCC)NN	38291-82-6	1283	Within Euclidean Distance and Leverages	Low reliability	116.16	149.033	359	Acetic acid, 2-methoxy-​, 1-​ethylundecyl ester	C(OC(=O)COC)(CCCCCCCCCC)CC	361149-11-3	Negative	Within Leverages	Low reliability
371	(E)-2-Dodecene	C(CCC/C=C/C)CCCCC	7206-13-5	3489	Within Euclidean Distance	Low reliability	168.32	587.268	360	Isoamyl acetate	C(CC(C)C)OC(=O)C	123-92-2	Positive	Within Euclidean Distance and Leverages	Low reliability
372	(7E)-7-Tetradecene	C(=CCCCCCC)CCCCCC	10374-74-0	4396	Within Euclidean Distance	Low reliability	196.37	863.243	361	N-(1-Cyano-1-methylethyl)isobutyramide	C(NC(=O)C(C)C)(C#N)(C)C	84213-57-0	Positive	Within Euclidean Distance and Leverages	Low reliability
373	1-Hexene, 3,5-dimethyl-	C(CC(C)C)(C=C)C	7423-69-0	1898	Within Euclidean Distance and Leverages	Low reliability	112.21	212.975	362	Pentanamide	C(C(=O)N)CCC	626-97-1	Positive	Within Euclidean Distance and Leverages	Low reliability
374	2,4-Dimethyl-1,4-pentadiene	C(C(=C)C)C(=C)C	4161-65-3	684	Within Euclidean Distance and Leverages	Low reliability	96.17	65.7803	363	N,N-Dibutylformamide	N(CCCC)(CCCC)C=O	761-65-9	Negative	Within Euclidean Distance and Leverages	Low reliability
375	2,4-Dimethyl-1-pentene	C(C(C)C)C(=C)C	2213-32-3	770	Within Euclidean Distance and Leverages	Low reliability	98.19	75.6063	364	N,N-Diethylformamide	N(CC)(CC)C=O	617-84-5	Negative	Within Euclidean Distance and Leverages	Low reliability
376	2-Hexene, 4-methyl-	C(C=CC)(CC)C	3404-55-5	1124	Within Euclidean Distance and Leverages	Low reliability	98.19	110.366	365	N-Butylformamide	C(CCC)NC=O	871-71-6	Negative	Within Euclidean Distance and Leverages	Low reliability
377	_x000D_ 1-Nonene	C(CCCC)CCC=C	124-11-8	3837	Within Euclidean Distance	Low reliability	126.24	484.383	366	n-ethyl-formamid	N(CC)C=O	627-45-2	Negative	Within Euclidean Distance and Leverages	Low reliability
378	1-Tidecene	C(CCCCCC)CCCCC=C	2437-56-1	2794	Within Euclidean Distance	Low reliability	182.35	509.486	367	N-Hexylbutyramide	C(=O)(NCCCCCC)CCC	10264-17-2	Positive	Within Euclidean Distance and Leverages	Low reliability
379	4,4-Dimethyl-1-pentene	C(C(C)(C)C)C=C	762-62-9	578	Within Euclidean Distance and Leverages	Low reliability	98.19	56.7538	368	2-Amino-2-cyanoacetamide	C(C(=O)N)(C#N)N	6719-21-7	Positive	Within Euclidean Distance and Leverages	Low reliability
380	4-Methyl-1-decene	C(CCCCCC)(CC=C)C	13151-29-6	2842	Within Euclidean Distance	Low reliability	154.29	438.492	369	Propionamide	C(=O)(CC)N	79-05-0	Positive	Within Euclidean Distance and Leverages	Moderate reliability
381	5-Octadecene, (5E)-	C(CCC/C=C/CCCC)CCCCCCCC	7206-21-5	3698	Out of Euclidean Distance and Leverages	Low reliability	252.5	933.745	370	Valeric Acid Hydrazine	C(=O)(CCCC)NN	38291-82-6	Positive	Within Euclidean Distance and Leverages	Low reliability
382	Undecane, 6-(2,2-dimethylpropylidene)-4,8-dimethyl-	C(=CC(C)(C)C)(CC(CCC)C)CC(CCC)C	56671-76-2	4529	Within Euclidean Distance	Low reliability	252.5	1143.57	371	(E)-2-Dodecene	C(CCC/C=C/C)CCCCC	7206-13-5	Negative	Within Euclidean Distance and Leverages	Low reliability
383	(E)-2,2-Dimethyl-3-decene	C(=C\CCCCCC)/C(C)(C)C	55499-02-0	2948	Within Euclidean Distance	Low reliability	168.32	496.207	372	(7E)-7-Tetradecene	C(=CCCCCCC)CCCCCC	10374-74-0	Negative	Within Euclidean Distance and Leverages	Low reliability
384	(7Z)-7-Tetradecene	C(=C\CCCCCC)\CCCCCC	41446-60-0	4396	Within Euclidean Distance	Low reliability	196.37	863.243	373	1-Hexene, 3,5-dimethyl-	C(CC(C)C)(C=C)C	7423-69-0	Positive	Within Euclidean Distance and Leverages	Low reliability
385	(Z)-3-Methyl-4-nonene	C(/C=C\CCCC)(CC)C	63830-69-3	2447	Within Euclidean Distance and Leverages	Low reliability	140.27	343.241	374	2,4-Dimethyl-1,4-pentadiene	C(C(=C)C)C(=C)C	4161-65-3	Positive	Within Euclidean Distance and Leverages	Low reliability
386	4-Undecene, 9-​methyl-	C(CCC(CC)C)C=CCCC	1150663-02-7	3194	Within Euclidean Distance	Low reliability	168.32	537.614	375	2,4-Dimethyl-1-pentene	C(C(C)C)C(=C)C	2213-32-3	Positive	Within Euclidean Distance and Leverages	Low reliability
387	2,2,3,3-tetramethylhexane	C(C(C)(C)C)(CCC)(C)C	13475-81-5	1778	Within Euclidean Distance and Leverages	Low reliability	142.28	252.974	376	2-Hexene, 4-methyl-	C(C=CC)(CC)C	3404-55-5	Negative	Within Euclidean Distance and Leverages	Low reliability
388	2,4-dimethyldecane	C(C(CC(C)C)C)CCCCC	2801-84-5	3330	Within Euclidean Distance	Low reliability	170.33	567.199	377	_x000D_ 1-Nonene	C(CCCC)CCC=C	124-11-8	Negative	Within Euclidean Distance and Leverages	Low reliability
389	2,5-DimethylNonane	C(CCC(C)C)(CCCC)C	17302-27-1	737	Within Euclidean Distance	Low reliability	156.31	115.2	378	1-Tidecene	C(CCCCCC)CCCCC=C	2437-56-1	Negative	Within Euclidean Distance and Leverages	Low reliability
390	2,6-Dimethylundecene	C(CCCC(C)C)(CCCCC)C	17301-23-4	2533	Within Euclidean Distance	Low reliability	184.36	466.984	379	4,4-Dimethyl-1-pentene	C(C(C)(C)C)C=C	762-62-9	Negative	Within Euclidean Distance and Leverages	Low reliability
391	3-methyl-3-ethylheptane	C(CCCC)(CC)(CC)C	17302-01-1	3070	Within Euclidean Distance and Leverages	Low reliability	142.28	436.8	380	4-Methyl-1-decene	C(CCCCCC)(CC=C)C	13151-29-6	Negative	Within Euclidean Distance and Leverages	Low reliability
392	pentane,2,3,3,4-tetramethyl-	C(C(C)C)(C(C)C)(C)C	16747-38-9	3942	Within Euclidean Distance and Leverages	Low reliability	128.25	505.562	381	5-Octadecene, (5E)-	C(CCC/C=C/CCCC)CCCCCCCC	7206-21-5	Negative	Out of Euclidean Distance and Leverages	Low reliability
393	Hexane, 2,3,3-trimethyl-	C(CCC)(C(C)C)(C)C	16747-28-7	2712	Within Euclidean Distance and Leverages	Low reliability	128.25	347.814	382	Undecane, 6-(2,2-dimethylpropylidene)-4,8-dimethyl-	C(=CC(C)(C)C)(CC(CCC)C)CC(CCC)C	56671-76-2	Positive	Within Euclidean Distance and Leverages	Low reliability
394	2,3,5-Trimethylheptane.	C(C(C(C)C)C)C(CC)C	20278-85-7	1498	Within Euclidean Distance and Leverages	Low reliability	142.28	213.135	383	(E)-2,2-Dimethyl-3-decene	C(=C\CCCCCC)/C(C)(C)C	55499-02-0	Positive	Within Euclidean Distance and Leverages	Low reliability
395	Heptadecane, 2,6,​10,​14-​tetramethyl-	C(CCCC(CCCC(C)C)C)(CCCC(CCC)C)C	18344-37-1	2589	Out of Euclidean Distance and Leverages	Low reliability	296.6	767.897	384	(7Z)-7-Tetradecene	C(=C\CCCCCC)\CCCCCC	41446-60-0	Negative	Within Euclidean Distance and Leverages	Low reliability
396	2,8-Dimethylundecane	C(CC(CCC)C)CCCC(C)C	17301-25-6	2533	Within Euclidean Distance	Low reliability	184.36	466.984	385	(Z)-3-Methyl-4-nonene	C(/C=C\CCCC)(CC)C	63830-69-3	Positive	Within Euclidean Distance and Leverages	Low reliability
397	2-Methylnonane	C(CCCCC)CC(C)C	871-83-0	2785	Within Euclidean Distance	Low reliability	142.28	396.25	386	4-Undecene, 9-​methyl-	C(CCC(CC)C)C=CCCC	1150663-02-7	Positive	Within Euclidean Distance and Leverages	Low reliability
398	3,3-Dimethyloctane	C(CCCCC)(CC)(C)C	4110-44-5	2774	Within Euclidean Distance	Low reliability	142.28	394.685	387	2,2,3,3-tetramethylhexane	C(C(C)(C)C)(CCC)(C)C	13475-81-5	Positive	Within Euclidean Distance and Leverages	Low reliability
399	3,4-Dimethylheptane	C(C(CC)C)(CCC)C	922-28-1	4730	Within Euclidean Distance and Leverages	Low reliability	128.25	606.623	388	2,4-dimethyldecane	C(C(CC(C)C)C)CCCCC	2801-84-5	Positive	Within Euclidean Distance and Leverages	Low reliability
400	3-Ethyl-2,4-dimethylpentane	C(C(C)C)(C(C)C)CC	1068-87-7	1362	Within Euclidean Distance and Leverages	Low reliability	128.25	174.677	389	2,5-DimethylNonane	C(CCC(C)C)(CCCC)C	17302-27-1	Positive	Within Euclidean Distance and Leverages	Low reliability
401	3-Methyloctane	C(CCCCC)(CC)C	2216-33-3	4764	Within Euclidean Distance	Low reliability	128.25	610.983	390	2,6-Dimethylundecene	C(CCCC(C)C)(CCCCC)C	17301-23-4	Positive	Within Euclidean Distance and Leverages	Low reliability
402	4-Methyldodecane	C(CCCCCCCC)(CCC)C	6117-97-1	2090	Within Euclidean Distance	Low reliability	184.36	385.312	391	3-methyl-3-ethylheptane	C(CCCC)(CC)(CC)C	17302-01-1	Negative	Within Euclidean Distance and Leverages	Low reliability
403	5-Methyl-5-propylnonane	C(CCCC)(CCCC)(CCC)C	17312-75-3	582	Within Euclidean Distance	Low reliability	184.36	107.298	392	pentane,2,3,3,4-tetramethyl-	C(C(C)C)(C(C)C)(C)C	16747-38-9	Positive	Within Euclidean Distance and Leverages	Low reliability
404	6-methylundecane	C(C(CCCCC)C)CCCC	17302-33-9	3492	Within Euclidean Distance	Low reliability	170.33	594.792	393	Hexane, 2,3,3-trimethyl-	C(CCC)(C(C)C)(C)C	16747-28-7	Positive	Within Euclidean Distance and Leverages	Low reliability
405	decane,2,6-dimethyl-_x000D_	C(CCCC(C)C)(CCCC)C	13150-81-7	2948	Within Euclidean Distance	Low reliability	170.33	502.133	394	2,3,5-Trimethylheptane.	C(C(C(C)C)C)C(CC)C	20278-85-7	Positive	Within Euclidean Distance and Leverages	Low reliability
406	Heptane	C(CCC)CCC	142-82-5	1905	Within Euclidean Distance	Low reliability	100.2	190.881	395	Heptadecane, 2,6,​10,​14-​tetramethyl-	C(CCCC(CCCC(C)C)C)(CCCC(CCC)C)C	18344-37-1	Positive	Out of Euclidean Distance and Leverages	Low reliability
407	n-Hendecane	C(CCCCC)CCCCC	1120-21-4	1988	Within Euclidean Distance	Low reliability	156.31	310.744	396	2,8-Dimethylundecane	C(CC(CCC)C)CCCC(C)C	17301-25-6	Positive	Within Euclidean Distance and Leverages	Low reliability
408	n-Nonadecane	C(CCCCCCCCC)CCCCCCCCC	629-92-5	3884	Out of Euclidean Distance and Leverages	Low reliability	268.5	1042.85	397	2-Methylnonane	C(CCCCC)CC(C)C	871-83-0	Positive	Within Euclidean Distance and Leverages	Low reliability
409	nonadecane,2-methyl-	C(CCCCCCCCCCC)CCCCCC(C)C	1560-86-7	3634	Out of Euclidean Distance and Leverages	Low reliability	282.5	1026.61	398	3,3-Dimethyloctane	C(CCCCC)(CC)(C)C	4110-44-5	Positive	Within Euclidean Distance and Leverages	Low reliability
410	Pentane, 2,2,4,4-tetramethyl-	C(C(C)(C)C)C(C)(C)C	1070-87-7	3490	Within Euclidean Distance and Leverages	Low reliability	128.25	447.593	399	3,4-Dimethylheptane	C(C(CC)C)(CCC)C	922-28-1	Negative	Within Euclidean Distance and Leverages	Low reliability
411	Tetraethylmethane	C(CC)(CC)(CC)CC	1067-20-5	1361	Within Euclidean Distance and Leverages	Low reliability	128.25	174.548	400	3-Ethyl-2,4-dimethylpentane	C(C(C)C)(C(C)C)CC	1068-87-7	Positive	Within Euclidean Distance and Leverages	Low reliability
412	2,2-dimethylundecane	C(CCCCCCCC)C(C)(C)C	17312-64-0	2327	Within Euclidean Distance	Low reliability	184.36	429.006	401	3-Methyloctane	C(CCCCC)(CC)C	2216-33-3	Negative	Within Euclidean Distance and Leverages	Low reliability
413	2,5-Dimethylheptane	C(CCC(C)C)(CC)C	2216-30-0	1988	Within Euclidean Distance and Leverages	Low reliability	128.25	254.961	402	4-Methyldodecane	C(CCCCCCCC)(CCC)C	6117-97-1	Positive	Within Euclidean Distance and Leverages	Low reliability
414	4-Ethyl-2,2,6,6-tetramethylheptane	C(C(CC(C)(C)C)CC)C(C)(C)C	62108-31-0	4655	Within Euclidean Distance and Leverages	Low reliability	184.36	858.196	403	5-Methyl-5-propylnonane	C(CCCC)(CCCC)(CCC)C	17312-75-3	Positive	Within Euclidean Distance and Leverages	Low reliability
415	6-ethyl-2-methyl-decane	C(CCCC(C)C)(CCCC)CC	62108-21-8	2263	Within Euclidean Distance	Low reliability	184.36	417.207	404	6-methylundecane	C(C(CCCCC)C)CCCC	17302-33-9	Positive	Within Euclidean Distance and Leverages	Low reliability
416	6-Methyltridecane	C(CCCCCCC)(CCCCC)C	13287-21-3	2900	Within Euclidean Distance	Low reliability	198.39	575.331	405	decane,2,6-dimethyl-_x000D_	C(CCCC(C)C)(CCCC)C	13150-81-7	Positive	Within Euclidean Distance and Leverages	Low reliability
417	Dodecane, 3-methyl-	C(CCCCCCCC)C(CC)C	17312-57-1	1868	Within Euclidean Distance	Low reliability	184.36	344.384	406	Heptane	C(CCC)CCC	142-82-5	Negative	Within Euclidean Distance and Leverages	Low reliability
418	Heptadecane, 2,6-dimethyl-	C(CCCCCCCCCCC)(CCCC(C)C)C	54105-67-8	4269	Out of Euclidean Distance and Leverages	Low reliability	268.5	1146.23	407	n-Hendecane	C(CCCCC)CCCCC	1120-21-4	Negative	Within Euclidean Distance and Leverages	Low reliability
419	Hexadecane,2,6,11,15-tetrymethyl-	C(C(CCCCC(CCCC(C)C)C)C)CCC(C)C	504-44-9	4093	Out of Euclidean Distance and Leverages	Low reliability	282.5	1156.27	408	n-Nonadecane	C(CCCCCCCCC)CCCCCCCCC	629-92-5	Negative	Out of Euclidean Distance and Leverages	Low reliability
420	Hexane,2,3,5-Trimethyl-	C(CC(C)C)(C(C)C)C	1069-53-0	1933	Within Euclidean Distance and Leverages	Low reliability	128.25	247.907	409	nonadecane,2-methyl-	C(CCCCCCCCCCC)CCCCCC(C)C	1560-86-7	Negative	Out of Euclidean Distance and Leverages	Low reliability
421	Octane, 2,3,6,7-tetramethyl-	C(C(C)C)(CCC(C(C)C)C)C	52670-34-5	3330	Within Euclidean Distance and Leverages	Low reliability	170.33	567.199	410	Pentane, 2,2,4,4-tetramethyl-	C(C(C)(C)C)C(C)(C)C	1070-87-7	Positive	Within Euclidean Distance and Leverages	Low reliability
422	Heptane, 5-ethyl-2,4-dimethyl-	C(C(CC(C)C)C)(CC)CC	61868-26-6	2189	Within Euclidean Distance and Leverages	Low reliability	156.31	342.163	411	Tetraethylmethane	C(CC)(CC)(CC)CC	1067-20-5	Negative	Within Euclidean Distance and Leverages	Low reliability
423	Hexadecane, 4-methyl-	C(CCCCCCCCCC)CC(CCC)C	25117-26-4	5218	Out of Euclidean Distance and Leverages	Low reliability	240.5	1254.93	412	2,2-dimethylundecane	C(CCCCCCCC)C(C)(C)C	17312-64-0	Positive	Within Euclidean Distance and Leverages	Low reliability
424	Heptane, 5-ethyl-2,2,3-trimethyl-	C(CC(C(C)(C)C)C)(CC)CC	62199-06-8	1114	Within Euclidean Distance and Leverages	Low reliability	170.33	189.748	413	2,5-Dimethylheptane	C(CCC(C)C)(CC)C	2216-30-0	Positive	Within Euclidean Distance and Leverages	Low reliability
425	Decane, 2,4,6-trimethyl-	C(CC(CCCC)C)(CC(C)C)C	62108-27-4	2537	Within Euclidean Distance	Low reliability	184.36	467.721	414	4-Ethyl-2,2,6,6-tetramethylheptane	C(C(CC(C)(C)C)CC)C(C)(C)C	62108-31-0	Positive	Within Euclidean Distance and Leverages	Low reliability
426	Nonadecane, 10-methyl-	C(C(CCCCCCCCC)C)CCCCCCCC	56862-62-5	3562	Out of Euclidean Distance and Leverages	Low reliability	282.5	1006.27	415	6-ethyl-2-methyl-decane	C(CCCC(C)C)(CCCC)CC	62108-21-8	Positive	Within Euclidean Distance and Leverages	Low reliability
427	Heptadecane,2,6,10,15-tetr	C(CCC(CCCCC(CC)C)C)C(CCCC(C)C)C	54833-48-6	2571	Out of Euclidean Distance and Leverages	Low reliability	296.6	762.559	416	6-Methyltridecane	C(CCCCCCC)(CCCCC)C	13287-21-3	Negative	Within Euclidean Distance and Leverages	Low reliability
428	9-Hexylheptadecane	C(CCCCCCCC)(CCCCCCCC)CCCCCC	55124-79-3	900	Out of Euclidean Distance and Leverages	Low reliability	324.6	292.14	417	Dodecane, 3-methyl-	C(CCCCCCCC)C(CC)C	17312-57-1	Negative	Within Euclidean Distance and Leverages	Low reliability
429	Dodecane	C(CCCCCC)CCCCC	112-40-3	3483	Within Euclidean Distance	Low reliability	170.33	593.259	418	Heptadecane, 2,6-dimethyl-	C(CCCCCCCCCCC)(CCCC(C)C)C	54105-67-8	Negative	Out of Euclidean Distance and Leverages	Low reliability
430	2-Butanone	C(=O)(CC)C	78-93-3	1495	Within Euclidean Distance and Leverages	Low reliability	72.11	107.804	419	Hexadecane,2,6,11,15-tetrymethyl-	C(C(CCCCC(CCCC(C)C)C)C)CCC(C)C	504-44-9	Positive	Out of Euclidean Distance and Leverages	Low reliability
431	2,3-Butanedione	C(=O)(C(=O)C)C	431-03-8	24932	Within Euclidean Distance and Leverages	Low reliability	86.09	2146.4	420	Hexane,2,3,5-Trimethyl-	C(CC(C)C)(C(C)C)C	1069-53-0	Positive	Within Euclidean Distance and Leverages	Low reliability
432	Acetone	C(=O)(C)C	67-64-1	2752	Within Euclidean Distance and Leverages	Low reliability	58.08	159.836	421	Octane, 2,3,6,7-tetramethyl-	C(C(C)C)(CCC(C(C)C)C)C	52670-34-5	Positive	Within Euclidean Distance and Leverages	Low reliability
433	6-hydroxyhexan-2-one	C(CCCO)C(=O)C	21856-89-3	1488	Within Euclidean Distance and Leverages	Low reliability	116.16	172.846	422	Heptane, 5-ethyl-2,4-dimethyl-	C(C(CC(C)C)C)(CC)CC	61868-26-6	Positive	Within Euclidean Distance and Leverages	Low reliability
434	2-Hexanone	C(C(=O)C)CCC	591-78-6	697	Within Euclidean Distance and Leverages	Low reliability	100.16	69.8115	423	Hexadecane, 4-methyl-	C(CCCCCCCCCC)CC(CCC)C	25117-26-4	Negative	Within Leverages	Low reliability
435	2-Pentanone	C(C(=O)C)CC	107-87-9	836	Within Euclidean Distance and Leverages	Low reliability	86.13	72.0047	424	Heptane, 5-ethyl-2,2,3-trimethyl-	C(CC(C(C)(C)C)C)(CC)CC	62199-06-8	Positive	Within Euclidean Distance and Leverages	Low reliability
436	Acetoin	C(C(=O)C)(C)O	513-86-0	7159	Within Euclidean Distance and Leverages	Low reliability	88.11	630.779	425	Decane, 2,4,6-trimethyl-	C(CC(CCCC)C)(CC(C)C)C	62108-27-4	Positive	Within Euclidean Distance and Leverages	Low reliability
437	1,3-Dihydroxyacetone	C(=O)(CO)CO	96-26-4	1625	Within Euclidean Distance and Leverages	Low reliability	90.08	146.38	426	Nonadecane, 10-methyl-	C(C(CCCCCCCCC)C)CCCCCCCC	56862-62-5	Negative	Out of Euclidean Distance and Leverages	Low reliability
438	3-Acetyl-1-propanol	C(C(=O)C)CCO	1071-73-4	278	Within Euclidean Distance and Leverages	Low reliability	102.13	28.3921	427	Heptadecane,2,6,10,15-tetr	C(CCC(CCCCC(CC)C)C)C(CCCC(C)C)C	54833-48-6	Negative	Out of Euclidean Distance and Leverages	Low reliability
439	3-Hexanone	C(=O)(CCC)CC	589-38-8	1799	Within Euclidean Distance and Leverages	Low reliability	100.16	180.188	428	9-Hexylheptadecane	C(CCCCCCCC)(CCCCCCCC)CCCCCC	55124-79-3	Negative	Out of Euclidean Distance and Leverages	Low reliability
440	6-Methyl-5-hepten-2-one	C(C=C(C)C)CC(=O)C	110-93-0	1790	Within Euclidean Distance and Leverages	Low reliability	126.2	225.898	429	Dodecane	C(CCCCCC)CCCCC	112-40-3	Negative	Within Euclidean Distance and Leverages	Low reliability
441	Diacetone Alcohol	C(C(C)(C)O)C(=O)C	123-42-2	1104	Within Euclidean Distance and Leverages	Low reliability	116.16	128.241	430	2-Butanone	C(=O)(CC)C	78-93-3	Positive	Within Euclidean Distance and Leverages	Low reliability
442	Hydroxyacetone	C(=O)(CO)C	116-09-6	3019	Within Euclidean Distance and Leverages	Low reliability	74.08	223.648	431	2,3-Butanedione	C(=O)(C(=O)C)C	431-03-8	Positive	Within Euclidean Distance and Leverages	Low reliability
443	1-Hydroxy-1-methylethyl methyl ketone	C(C(=O)C)(C)(C)O	115-22-0	454	Within Euclidean Distance and Leverages	Low reliability	102.13	46.367	432	Acetone	C(=O)(C)C	67-64-1	Positive	Within Euclidean Distance and Leverages	Low reliability
444	1-Hydroxy-2-methyl-3-butanone	C(C(=O)C)(CO)C	3393-64-4	342	Within Euclidean Distance and Leverages	Low reliability	102.13	34.9285	433	6-hydroxyhexan-2-one	C(CCCO)C(=O)C	21856-89-3	Positive	Within Euclidean Distance and Leverages	Low reliability
445	2-Nonanone	C(CCCCC)CC(=O)C	821-55-6	2284	Within Euclidean Distance	Low reliability	142.24	324.876	434	2-Hexanone	C(C(=O)C)CCC	591-78-6	Positive	Within Euclidean Distance and Leverages	Low reliability
446	2-Octanone	C(CC(=O)C)CCCC	111-13-7	988	Within Euclidean Distance and Leverages	Low reliability	128.21	126.671	435	2-Pentanone	C(C(=O)C)CC	107-87-9	Positive	Within Euclidean Distance and Leverages	Low reliability
447	2,2,8,8-Tetramethylnonane-5-one	C(=O)(CCC(C)(C)C)CCC(C)(C)C	5709-95-5	616	Within Euclidean Distance and Leverages	Low reliability	198.34	122.177	436	Acetoin	C(C(=O)C)(C)O	513-86-0	Positive	Within Euclidean Distance and Leverages	Low reliability
448	2-Heptadecanone	C(CCCCCCCCCC)CCCCC(=O)C	2922-51-2	2838	Out of Euclidean Distance and Leverages	Low reliability	254.5	722.271	437	1,3-Dihydroxyacetone	C(=O)(CO)CO	96-26-4	Positive	Within Euclidean Distance and Leverages	Low reliability
449	2-Heptanone	C(CCCC)C(=O)C	110-43-0	996	Within Euclidean Distance and Leverages	Low reliability	114.19	113.733	438	3-Acetyl-1-propanol	C(C(=O)C)CCO	1071-73-4	Positive	Within Euclidean Distance and Leverages	Low reliability
450	3-Heptanone	C(=O)(CCCC)CC	106-35-4	1037	Within Euclidean Distance and Leverages	Low reliability	114.19	118.415	439	3-Hexanone	C(=O)(CCC)CC	589-38-8	Positive	Within Euclidean Distance and Leverages	Low reliability
451	6,10-Dimethyl-5,9-undecadien-2-one	C(=CCCC(=O)C)(CCC=C(C)C)C	689-67-8	1834	Within Euclidean Distance and Leverages	Low reliability	194.31	356.365	440	6-Methyl-5-hepten-2-one	C(C=C(C)C)CC(=O)C	110-93-0	Positive	Within Euclidean Distance and Leverages	Low reliability
452	(5E,9E)-6,10-Dimethyl-5,9-dodecadien-2-one	C(=C\CCC(=O)C)(/CC/C=C(/CC)\C)\C	13833-96-0	4396	Within Euclidean Distance	Low reliability	208.34	915.863	441	Diacetone Alcohol	C(C(C)(C)O)C(=O)C	123-42-2	Positive	Within Euclidean Distance and Leverages	Low reliability
453	2,3-Heptanedione	C(=O)(C(=O)C)CCCC	96-04-8	679	Within Euclidean Distance and Leverages	Low reliability	128.17	87.0274	442	Hydroxyacetone	C(=O)(CO)C	116-09-6	Positive	Within Euclidean Distance and Leverages	Low reliability
454	2,5-Heptadien-4-one,2,6-dimethyl-	C(=C(C)C)C(=O)C=C(C)C	504-20-1	17273	Within Euclidean Distance and Leverages	Low reliability	138.21	2387.3	443	1-Hydroxy-1-methylethyl methyl ketone	C(C(=O)C)(C)(C)O	115-22-0	Positive	Within Euclidean Distance and Leverages	Low reliability
455	2-Decanone	C(CCCCC)CCC(=O)C	693-54-9	2023	Within Euclidean Distance	Low reliability	156.26	316.114	444	1-Hydroxy-2-methyl-3-butanone	C(C(=O)C)(CO)C	3393-64-4	Positive	Within Euclidean Distance and Leverages	Low reliability
456	2-Heptanone,6-methyl-	C(CC(C)C)CC(=O)C	928-68-7	1669	Within Euclidean Distance and Leverages	Low reliability	128.21	213.982	445	2-Nonanone	C(CCCCC)CC(=O)C	821-55-6	Positive	Within Euclidean Distance and Leverages	Low reliability
457	2-Pentanone,3-methyl-	C(C(=O)C)(CC)C	565-61-7	753	Within Euclidean Distance and Leverages	Low reliability	100.16	75.4205	446	2-Octanone	C(CC(=O)C)CCCC	111-13-7	Positive	Within Euclidean Distance and Leverages	Low reliability
458	3-Hepten-2-one	C(=CCCC)C(=O)C	1119-44-4	1011	Within Euclidean Distance and Leverages	Low reliability	112.17	113.404	447	2,2,8,8-Tetramethylnonane-5-one	C(=O)(CCC(C)(C)C)CCC(C)(C)C	5709-95-5	Positive	Within Euclidean Distance and Leverages	Low reliability
459	3-Methyl-2-butanone	C(C(=O)C)(C)C	563-80-4	4828	Within Euclidean Distance and Leverages	Low reliability	86.13	415.836	448	2-Heptadecanone	C(CCCCCCCCCC)CCCCC(=O)C	2922-51-2	Positive	Within Leverages	Low reliability
460	4,6-dimethyl-2-heptanon	C(C(CC(=O)C)C)C(C)C	19549-80-5	2515	Within Euclidean Distance and Leverages	Low reliability	142.24	357.734	449	2-Heptanone	C(CCCC)C(=O)C	110-43-0	Positive	Within Euclidean Distance and Leverages	Low reliability
461	4-Heptanone	C(=O)(CCC)CCC	123-19-3	2617	Within Euclidean Distance and Leverages	Low reliability	114.19	298.835	450	3-Heptanone	C(=O)(CCCC)CC	106-35-4	Positive	Within Euclidean Distance and Leverages	Low reliability
462	4-Hydroxy-2-butanone	C(C(=O)C)CO	590-90-9	2835	Within Euclidean Distance and Leverages	Low reliability	88.11	249.792	451	6,10-Dimethyl-5,9-undecadien-2-one	C(=CCCC(=O)C)(CCC=C(C)C)C	689-67-8	Positive	Within Euclidean Distance and Leverages	Low reliability
463	4-Methyl-2-pentanone	C(C(C)C)C(=O)C	108-10-1	727	Within Euclidean Distance and Leverages	Low reliability	100.16	72.8163	452	(5E,9E)-6,10-Dimethyl-5,9-dodecadien-2-one	C(=C\CCC(=O)C)(/CC/C=C(/CC)\C)\C	13833-96-0	Positive	Within Euclidean Distance and Leverages	Low reliability
464	8-Oxopentadecane	C(=O)(CCCCCCC)CCCCCCC	818-23-5	1014	Within Euclidean Distance	Low reliability	226.4	229.57	453	2,3-Heptanedione	C(=O)(C(=O)C)CCCC	96-04-8	Negative	Within Euclidean Distance and Leverages	Low reliability
465	Acetonylacetone	C(CC(=O)C)C(=O)C	110-13-4	385	Within Euclidean Distance and Leverages	Low reliability	114.14	43.9439	454	2,5-Heptadien-4-one,2,6-dimethyl-	C(=C(C)C)C(=O)C=C(C)C	504-20-1	Positive	Within Euclidean Distance and Leverages	Low reliability
466	Geranylacetone	C(=C\CCC(=O)C)(/CCC=C(C)C)\C	3796-70-1	1834	Within Euclidean Distance and Leverages	Low reliability	194.31	356.365	455	2-Decanone	C(CCCCC)CCC(=O)C	693-54-9	Positive	Within Euclidean Distance and Leverages	Low reliability
467	Heptan-2,5-dione	C(=O)(CCC(=O)C)CC	1703-51-1	646	Within Euclidean Distance and Leverages	Low reliability	128.17	82.7978	456	2-Heptanone,6-methyl-	C(CC(C)C)CC(=O)C	928-68-7	Positive	Within Euclidean Distance and Leverages	Low reliability
468	Mesity oxide	C(=C(C)C)C(=O)C	141-79-7	3627	Within Euclidean Distance and Leverages	Low reliability	98.14	355.954	457	2-Pentanone,3-methyl-	C(C(=O)C)(CC)C	565-61-7	Positive	Within Euclidean Distance and Leverages	Low reliability
469	octadecan-2-one	C(CCCCCCCCCCC)CCCCC(=O)C	7373-13-9	2838	Out of Euclidean Distance and Leverages	Low reliability	268.5	762.003	458	3-Hepten-2-one	C(=CCCC)C(=O)C	1119-44-4	Positive	Within Euclidean Distance and Leverages	Low reliability
470	Pentadecan-3-one	C(CCC(=O)CC)CCCCCCCCC	18787-66-1	3564	Within Euclidean Distance	Low reliability	226.4	806.89	459	3-Methyl-2-butanone	C(C(=O)C)(C)C	563-80-4	Positive	Within Euclidean Distance and Leverages	Low reliability
471	3-methylhexane-2,4-dione	C(C(=O)CC)(C(=O)C)C	4220-52-4	619	Within Euclidean Distance and Leverages	Low reliability	128.17	79.3372	460	4,6-dimethyl-2-heptanon	C(C(CC(=O)C)C)C(C)C	19549-80-5	Positive	Within Euclidean Distance and Leverages	Low reliability
472	3,3-dimethyl-2-hexanone	C(CCC)(C(=O)C)(C)C	26118-38-7	708	Within Euclidean Distance and Leverages	Low reliability	128.21	90.7727	461	4-Heptanone	C(=O)(CCC)CCC	123-19-3	Positive	Within Euclidean Distance and Leverages	Low reliability
473	4-Tridecanone, 5-​ethyl-	C(CCCCCCCC)(C(=O)CCC)CC	40238-74-2	3564	Within Euclidean Distance	Low reliability	226.4	806.89	462	4-Hydroxy-2-butanone	C(C(=O)C)CO	590-90-9	Positive	Within Euclidean Distance and Leverages	Low reliability
474	4-hydroxypentan-2-one	C(C(C)O)C(=O)C	4161-60-8	336	Within Euclidean Distance and Leverages	Low reliability	102.13	34.3157	463	4-Methyl-2-pentanone	C(C(C)C)C(=O)C	108-10-1	Positive	Within Euclidean Distance and Leverages	Low reliability
475	9-Octadecanone	C(C(=O)CCCCCCCC)CCCCCCCC	18394-00-8	549	Out of Euclidean Distance and Leverages	Low reliability	268.5	147.407	464	8-Oxopentadecane	C(=O)(CCCCCCC)CCCCCCC	818-23-5	Negative	Within Euclidean Distance and Leverages	Low reliability
476	1,2-Diacetylethene	C(=CC(=O)C)C(=O)C	4436-75-3	3268	Within Euclidean Distance and Leverages	Moderate reliability	112.13	366.441	465	Acetonylacetone	C(CC(=O)C)C(=O)C	110-13-4	Positive	Within Euclidean Distance and Leverages	Low reliability
477	Acetic acid	C(=O)(C)O	64-19-7	71343	Within Euclidean Distance and Leverages	Moderate reliability	60.05	4284.15	466	Geranylacetone	C(=C\CCC(=O)C)(/CCC=C(C)C)\C	3796-70-1	Positive	Within Euclidean Distance and Leverages	Low reliability
478	Nonanoic acid	C(CCCCC)CCC(=O)O	112-05-0	2366	Within Euclidean Distance	Low reliability	158.24	374.396	467	Heptan-2,5-dione	C(=O)(CCC(=O)C)CC	1703-51-1	Positive	Within Euclidean Distance and Leverages	Low reliability
479	Octanoic acid	C(CCCCC)CC(=O)O	124-07-2	1247	Within Euclidean Distance and Leverages	Low reliability	144.21	179.83	468	Mesity oxide	C(=C(C)C)C(=O)C	141-79-7	Positive	Within Euclidean Distance and Leverages	Low reliability
480	Decanoic acid	C(CCCCCC)CCC(=O)O	334-48-5	4299	Within Euclidean Distance	Low reliability	172.26	740.546	469	octadecan-2-one	C(CCCCCCCCCCC)CCCCC(=O)C	7373-13-9	Positive	Out of Euclidean Distance and Leverages	Low reliability
481	Glyoxylic acid	C(=O)(C=O)O	298-12-4	4383	Within Euclidean Distance and Leverages	Low reliability	74.04	324.517	470	Pentadecan-3-one	C(CCC(=O)CC)CCCCCCCCC	18787-66-1	Negative	Within Euclidean Distance and Leverages	Low reliability
482	Hendecanoic acid	C(CCCCCC)CCCC(=O)O	112-37-8	4323	Within Euclidean Distance	Low reliability	186.29	805.332	471	3-methylhexane-2,4-dione	C(C(=O)CC)(C(=O)C)C	4220-52-4	Positive	Within Euclidean Distance and Leverages	Low reliability
483	Ketomalonic acid	C(=O)(C(=O)O)C(=O)O	473-90-5	34738	Within Euclidean Distance and Leverages	Low reliability	118.04	4100.47	472	3,3-dimethyl-2-hexanone	C(CCC)(C(=O)C)(C)C	26118-38-7	Positive	Within Euclidean Distance and Leverages	Low reliability
484	Oxalic acid	C(=O)(C(=O)O)O	144-62-7	23403	Within Euclidean Distance and Leverages	Low reliability	90.03	2106.97	473	4-Tridecanone, 5-​ethyl-	C(CCCCCCCC)(C(=O)CCC)CC	40238-74-2	Negative	Within Euclidean Distance and Leverages	Low reliability
485	2-Butenedioic acid, 2-ethyl-3-methyl-, (2Z)-	C(=C(\C(=O)O)/C)(\C(=O)O)/CC	41654-09-5	1130	Within Euclidean Distance and Leverages	Moderate reliability	158.15	178.71	474	4-hydroxypentan-2-one	C(C(C)O)C(=O)C	4161-60-8	Positive	Within Euclidean Distance and Leverages	Low reliability
486	Azelaic acid	C(CC(=O)O)CCCCCC(=O)O	123-99-9	4244	Within Euclidean Distance and Leverages	Low reliability	188.22	798.806	475	9-Octadecanone	C(C(=O)CCCCCCCC)CCCCCCCC	18394-00-8	Negative	Out of Euclidean Distance and Leverages	Low reliability
487	Glycolic acid	C(=O)(CO)O	79-14-1	4462	Within Euclidean Distance and Leverages	Low reliability	76.05	339.335	476	1,2-Diacetylethene	C(=CC(=O)C)C(=O)C	4436-75-3	Positive	Within Euclidean Distance and Leverages	Moderate reliability
488	Decanoicacid,2-methyl-	C(C(C(=O)O)C)CCCCCCC	24323-23-7	4004	Within Euclidean Distance	Low reliability	186.29	745.905	477	Acetic acid	C(=O)(C)O	64-19-7	Positive	Within Euclidean Distance and Leverages	Low reliability
489	Lauricacid	C(CCCCCCCC)CCC(=O)O	143-07-7	2980	Within Euclidean Distance	Low reliability	200.32	596.954	478	Nonanoic acid	C(CCCCC)CCC(=O)O	112-05-0	Negative	Within Euclidean Distance and Leverages	Low reliability
490	maleicacid((E)-3-carboxyacrylate)	C(=C\C(=O)O)\C(=O)O	110-16-7	20691	Within Euclidean Distance and Leverages	Moderate reliability	116.07	2401.6	479	Octanoic acid	C(CCCCC)CC(=O)O	124-07-2	Negative	Within Euclidean Distance and Leverages	Low reliability
491	Formic acid	C(=O)O	64-18-6	1279	Within Euclidean Distance and Leverages	Low reliability	46.025	58.866	480	Decanoic acid	C(CCCCCC)CCC(=O)O	334-48-5	Negative	Within Euclidean Distance and Leverages	Low reliability
492	Fumaric acid	C(=C\C(=O)O)/C(=O)O	110-17-8	20691	Within Euclidean Distance and Leverages	Moderate reliability	116.07	2401.6	481	Glyoxylic acid	C(=O)(C=O)O	298-12-4	Positive	Within Euclidean Distance and Leverages	Low reliability
493	Oxobutanedioic acid	C(=O)(CC(=O)O)C(=O)O	328-42-7	5408	Within Euclidean Distance and Leverages	Low reliability	132.07	714.235	482	Hendecanoic acid	C(CCCCCC)CCCC(=O)O	112-37-8	Negative	Within Euclidean Distance and Leverages	Low reliability
494	PentadecanoicAcid	C(CCCCCCCC)CCCCCC(=O)O	1002-84-2	2586	Within Euclidean Distance	Low reliability	242.4	626.846	483	Ketomalonic acid	C(=O)(C(=O)O)C(=O)O	473-90-5	Positive	Within Euclidean Distance and Leverages	Low reliability
495	Pyruvic acid	C(=O)(C(=O)O)C	127-17-3	13147	Within Euclidean Distance and Leverages	Low reliability	88.06	1157.72	484	Oxalic acid	C(=O)(C(=O)O)O	144-62-7	Negative	Within Euclidean Distance and Leverages	Low reliability
496	TridecanoicAcid	C(CCCCCCCCC)CCC(=O)O	638-53-9	3341	Within Euclidean Distance	Low reliability	214.34	716.11	485	2-Butenedioic acid, 2-ethyl-3-methyl-, (2Z)-	C(=C(\C(=O)O)/C)(\C(=O)O)/CC	41654-09-5	Negative	Within Euclidean Distance and Leverages	Moderate reliability
497	1,11-Undecanedicarboxylic acid	C(CC(=O)O)CCCCCCCCCC(=O)O	505-52-2	3802	Within Euclidean Distance	Low reliability	244.33	928.943	486	Azelaic acid	C(CC(=O)O)CCCCCC(=O)O	123-99-9	Negative	Within Euclidean Distance and Leverages	Low reliability
498	5-Oxohexanoate	C(CC(=O)C)CC(=O)O	3128-06-1	4248	Within Euclidean Distance and Leverages	Low reliability	130.14	552.835	487	Glycolic acid	C(=O)(CO)O	79-14-1	Positive	Within Euclidean Distance and Leverages	Low reliability
499	Glutaric acid	C(CC(=O)O)CC(=O)O	110-94-1	5342	Within Euclidean Distance and Leverages	Low reliability	132.11	705.732	488	Decanoicacid,2-methyl-	C(C(C(=O)O)C)CCCCCCC	24323-23-7	Negative	Within Euclidean Distance and Leverages	Low reliability
500	Isobutyric acid	C(C(=O)O)(C)C	79-31-2	11074	Within Euclidean Distance and Leverages	Low reliability	88.11	975.73	489	Lauricacid	C(CCCCCCCC)CCC(=O)O	143-07-7	Negative	Within Euclidean Distance and Leverages	Low reliability
501	Malonic acid	C(C(=O)O)C(=O)O	141-82-2	4591	Within Euclidean Distance and Leverages	Low reliability	104.06	477.739	490	maleicacid((E)-3-carboxyacrylate)	C(=C\C(=O)O)\C(=O)O	110-16-7	Positive	Within Euclidean Distance and Leverages	Moderate reliability
502	n-Heptadecoic acid	C(CCCCCCCCCCC)CCCCC(=O)O	506-12-7	2164	Out of Euclidean Distance and Leverages	Low reliability	270.5	585.362	491	Formic acid	C(=O)O	64-18-6	Positive	Within Euclidean Distance and Leverages	Low reliability
503	Pimelic acid	C(CC(=O)O)CCCC(=O)O	111-16-0	2859	Out of Euclidean Distance and Leverages	Low reliability	160.17	457.926	492	Fumaric acid	C(=C\C(=O)O)/C(=O)O	110-17-8	Positive	Within Euclidean Distance and Leverages	Moderate reliability
504	Suberic acid	C(CC(=O)O)CCCCC(=O)O	505-48-6	4270	Within Euclidean Distance and Leverages	Low reliability	174.19	743.791	493	Oxobutanedioic acid	C(=O)(CC(=O)O)C(=O)O	328-42-7	Positive	Within Euclidean Distance and Leverages	Low reliability
505	2,2-Dimethylbutyric acid	C(C(=O)O)(CC)(C)C	595-37-9	2899	Within Euclidean Distance and Leverages	Low reliability	116.16	336.748	494	PentadecanoicAcid	C(CCCCCCCC)CCCCCC(=O)O	1002-84-2	Negative	Within Leverages	Low reliability
506	2,2-Dimethylsuccinic acid	C(CC(=O)O)(C(=O)O)(C)C	597-43-3	1685	Within Euclidean Distance and Leverages	Low reliability	146.14	246.246	495	Pyruvic acid	C(=O)(C(=O)O)C	127-17-3	Positive	Within Euclidean Distance and Leverages	Low reliability
507	2-Methyl butyric acid	C(C(=O)O)(CC)C	116-53-0	461	Within Euclidean Distance and Leverages	Low reliability	102.13	47.0819	496	TridecanoicAcid	C(CCCCCCCCC)CCC(=O)O	638-53-9	Negative	Within Euclidean Distance and Leverages	Low reliability
508	2-Oxovaleric acid	C(=O)(CCC)C(=O)O	1821-02-9	658	Within Euclidean Distance and Leverages	Low reliability	116.11	76.4004	497	1,11-Undecanedicarboxylic acid	C(CC(=O)O)CCCCCCCCCC(=O)O	505-52-2	Negative	Within Euclidean Distance and Leverages	Low reliability
509	Valeric acid	C(C(=O)O)CCC	109-52-4	337	Within Euclidean Distance and Leverages	Low reliability	102.13	34.4178	498	5-Oxohexanoate	C(CC(=O)C)CC(=O)O	3128-06-1	Positive	Within Euclidean Distance and Leverages	Low reliability
510	1,1-Butanedicarboxylic acid	C(CCC)(C(=O)O)C(=O)O	616-62-6	1763	Within Euclidean Distance and Leverages	Low reliability	146.14	257.645	499	Glutaric acid	C(CC(=O)O)CC(=O)O	110-94-1	Positive	Within Euclidean Distance and Leverages	Low reliability
511	10-ethoxy-10-keto-capric acid	C(CCCCCC(=O)O)CCC(=O)OCC	693-55-0	2630	Within Euclidean Distance	Low reliability	230.3	605.689	500	Isobutyric acid	C(C(=O)O)(C)C	79-31-2	Positive	Within Euclidean Distance and Leverages	Low reliability
512	2,2-Dimethylglutaric acid	C(CCC(=O)O)(C(=O)O)(C)C	681-57-2	2291	Within Euclidean Distance and Leverages	Low reliability	160.17	366.949	501	Malonic acid	C(C(=O)O)C(=O)O	141-82-2	Positive	Within Euclidean Distance and Leverages	Low reliability
513	2-Ethylhexanoic acid	C(CCCC)(C(=O)O)CC	149-57-5	4455	Within Euclidean Distance and Leverages	Low reliability	144.21	642.456	502	n-Heptadecoic acid	C(CCCCCCCCCCC)CCCCC(=O)O	506-12-7	Negative	Out of Euclidean Distance and Leverages	Low reliability
514	2-Methylvaleric acid	C(CCC)(C(=O)O)C	97-61-0	796	Within Euclidean Distance and Leverages	Low reliability	116.16	92.4634	503	Pimelic acid	C(CC(=O)O)CCCC(=O)O	111-16-0	Positive	Within Euclidean Distance and Leverages	Low reliability
515	3-Hydroxydecanoic acid	C(C(CC(=O)O)O)CCCCCC	14292-26-3	4317	Within Euclidean Distance and Leverages	Low reliability	188.26	812.718	504	Suberic acid	C(CC(=O)O)CCCCC(=O)O	505-48-6	Positive	Within Euclidean Distance and Leverages	Low reliability
516	3-methyl-2-ketobutanoic acid	C(=O)(C(C)C)C(=O)O	759-05-7	1673	Within Euclidean Distance and Leverages	Low reliability	116.11	194.252	505	2,2-Dimethylbutyric acid	C(C(=O)O)(CC)(C)C	595-37-9	Negative	Within Euclidean Distance and Leverages	Low reliability
517	4-Methyl-3-penten-1-oic acid	C(=C(C)C)CC(=O)O	504-85-8	2717	Within Euclidean Distance and Leverages	Low reliability	114.14	310.118	506	2,2-Dimethylsuccinic acid	C(CC(=O)O)(C(=O)O)(C)C	597-43-3	Positive	Within Euclidean Distance and Leverages	Low reliability
518	Acetoacetic Acid	C(C(=O)C)C(=O)O	541-50-4	4593	Within Euclidean Distance and Leverages	Low reliability	102.09	468.899	507	2-Methyl butyric acid	C(C(=O)O)(CC)C	116-53-0	Positive	Within Euclidean Distance and Leverages	Low reliability
519	Adipic acid	C(CCC(=O)O)CC(=O)O	124-04-9	4811	Within Euclidean Distance and Leverages	Low reliability	146.14	703.08	508	2-Oxovaleric acid	C(=O)(CCC)C(=O)O	1821-02-9	Negative	Within Euclidean Distance and Leverages	Low reliability
520	Azelaic acid monomethyl ester	C(=O)(CCCCCCCC(=O)O)OC	2104-19-0	3697	Within Euclidean Distance and Leverages	Low reliability	202.25	747.718	509	Valeric acid	C(C(=O)O)CCC	109-52-4	Positive	Within Euclidean Distance and Leverages	Low reliability
521	Butyric Acid	C(C(=O)O)CC	107-92-6	2224	Within Euclidean Distance and Leverages	Low reliability	88.11	195.957	510	1,1-Butanedicarboxylic acid	C(CCC)(C(=O)O)C(=O)O	616-62-6	Negative	Within Euclidean Distance and Leverages	Low reliability
522	Heptanoic acid	C(CC(=O)O)CCCC	111-14-8	1093	Within Euclidean Distance and Leverages	Low reliability	130.18	142.287	511	10-ethoxy-10-keto-capric acid	C(CCCCCC(=O)O)CCC(=O)OCC	693-55-0	Positive	Within Euclidean Distance and Leverages	Low reliability
523	Hexanoic acid	C(CCCC)C(=O)O	142-62-1	1121	Within Euclidean Distance and Leverages	Low reliability	116.16	130.215	512	2,2-Dimethylglutaric acid	C(CCC(=O)O)(C(=O)O)(C)C	681-57-2	Positive	Within Euclidean Distance and Leverages	Low reliability
524	Isovaleric acid	C(C(C)C)C(=O)O	503-74-2	232	Within Euclidean Distance and Leverages	Low reliability	102.13	23.6942	513	2-Ethylhexanoic acid	C(CCCC)(C(=O)O)CC	149-57-5	Negative	Within Euclidean Distance and Leverages	Low reliability
525	Levulinic acid	C(CC(=O)O)C(=O)C	123-76-2	543	Within Euclidean Distance and Leverages	Moderate reliability	116.11	63.0477	514	2-Methylvaleric acid	C(CCC)(C(=O)O)C	97-61-0	Negative	Within Euclidean Distance and Leverages	Low reliability
526	Myristic acid	C(CCCCCCCC)CCCCC(=O)O	544-63-8	2917	Within Euclidean Distance	Low reliability	228.37	666.155	515	3-Hydroxydecanoic acid	C(C(CC(=O)O)O)CCCCCC	14292-26-3	Positive	Within Euclidean Distance and Leverages	Low reliability
527	Octanedioic acid 1-methyl ester	C(=O)(CCCCCCC(=O)O)OC	3946-32-5	4896	Within Euclidean Distance and Leverages	Low reliability	188.22	921.525	516	3-methyl-2-ketobutanoic acid	C(=O)(C(C)C)C(=O)O	759-05-7	Negative	Within Euclidean Distance and Leverages	Low reliability
528	Palmitic acid	C(CCCCCCCCCC)CCCCC(=O)O	57-10-3	2164	Out of Euclidean Distance and Leverages	Low reliability	256.42	554.893	517	4-Methyl-3-penten-1-oic acid	C(=C(C)C)CC(=O)O	504-85-8	Positive	Within Euclidean Distance and Leverages	Low reliability
529	Sebacic acid	C(CC(=O)O)CCCCCCC(=O)O	111-20-6	3238	Within Euclidean Distance and Leverages	Low reliability	202.25	654.885	518	Acetoacetic Acid	C(C(=O)C)C(=O)O	541-50-4	Positive	Within Euclidean Distance and Leverages	Low reliability
530	Stearic acid	C(CCCCCCCCCCC)CCCCCC(=O)O	57-11-4	2903	Out of Euclidean Distance and Leverages	Low reliability	284.5	825.904	519	Adipic acid	C(CCC(=O)O)CC(=O)O	124-04-9	Positive	Within Euclidean Distance and Leverages	Low reliability
531	Succinic acid	C(CC(=O)O)C(=O)O	110-15-6	4456	Within Euclidean Distance and Leverages	Low reliability	118.09	526.209	520	Azelaic acid monomethyl ester	C(=O)(CCCCCCCC(=O)O)OC	2104-19-0	Positive	Within Euclidean Distance and Leverages	Low reliability
532	Tetracosanoic Acid	C(CCCCCCCCCCCCCCCC)CCCCCCC(=O)O	557-59-5	3836	Out of Euclidean Distance and Leverages	Low reliability	368.6	1413.95	521	Butyric Acid	C(C(=O)O)CC	107-92-6	Positive	Within Euclidean Distance and Leverages	Low reliability
533	Undecanedioic acid	C(CC(=O)O)CCCCCCCC(=O)O	1852-04-6	2658	Within Euclidean Distance	Low reliability	216.27	574.846	522	Heptanoic acid	C(CC(=O)O)CCCC	111-14-8	Negative	Within Euclidean Distance and Leverages	Low reliability
534	Heneicosylic Acid	C(CCCCCCCCCCCCC)CCCCCCC(=O)O	2363-71-5	1593	Out of Euclidean Distance and Leverages	Low reliability	326.6	520.274	523	Hexanoic acid	C(CCCC)C(=O)O	142-62-1	Positive	Within Euclidean Distance and Leverages	Low reliability
535	9-Hexadecenoic acid, (9E)-	C(CC/C=C/CCCCCC)CCCCC(=O)O	10030-73-6	2164	Within Euclidean Distance	Low reliability	254.41	550.543	524	Isovaleric acid	C(C(C)C)C(=O)O	503-74-2	Positive	Within Euclidean Distance and Leverages	Low reliability
536	2-oxobutanedioic acid	C(=O)(CC(=O)[O-])C(=O)[O-]	149-63-3	16837	Within Euclidean Distance and Leverages	Low reliability	130.06	2189.82	525	Levulinic acid	C(CC(=O)O)C(=O)C	123-76-2	Positive	Within Euclidean Distance and Leverages	Low reliability
537	2,6-Diaminopimelic acid	C(C(=O)O)(CCCC(C(=O)O)N)N	583-93-7	2120	Within Euclidean Distance and Leverages	Low reliability	190.2	403.224	526	Myristic acid	C(CCCCCCCC)CCCCC(=O)O	544-63-8	Negative	Within Euclidean Distance and Leverages	Low reliability
538	2-Methyl-3-aminopropanoic acid	C(C(=O)O)(CN)C	144-90-1	2504	Within Euclidean Distance and Leverages	Low reliability	103.12	258.212	527	Octanedioic acid 1-methyl ester	C(=O)(CCCCCCC(=O)O)OC	3946-32-5	Positive	Within Euclidean Distance and Leverages	Low reliability
539	2-Oxooctanoic acid	C(=O)(CCCCCC)C(=O)O	328-51-8	4354	Within Euclidean Distance and Leverages	Low reliability	158.19	688.759	528	Palmitic acid	C(CCCCCCCCCC)CCCCC(=O)O	57-10-3	Negative	Within Leverages	Low reliability
540	Pentanedioic acid, 2-methyl-	C(CCC(=O)O)(C(=O)O)C	18069-17-5	2731	Within Euclidean Distance and Leverages	Low reliability	146.14	399.108	529	Sebacic acid	C(CC(=O)O)CCCCCCC(=O)O	111-20-6	Negative	Within Euclidean Distance and Leverages	Low reliability
541	Butanoic acid, 2,3-dioxo- (9CI)	C(=O)(C(=O)C)C(=O)O	4374-46-3	19167	Within Euclidean Distance and Leverages	Low reliability	116.07	2224.71	530	Stearic acid	C(CCCCCCCCCCC)CCCCCC(=O)O	57-11-4	Negative	Out of Euclidean Distance and Leverages	Low reliability
542	Hexanoic acid, 2-ethyl-3-methyl-	C(C(CCC)C)(C(=O)O)CC	74581-94-5	2366	Within Euclidean Distance and Leverages	Low reliability	158.24	374.396	531	Succinic acid	C(CC(=O)O)C(=O)O	110-15-6	Positive	Within Euclidean Distance and Leverages	Low reliability
543	Decyl aldehyde	C(CCCCC)CCCC=O	112-31-2	817	Within Euclidean Distance	Low reliability	156.26	127.664	532	Tetracosanoic Acid	C(CCCCCCCCCCCCCCCC)CCCCCCC(=O)O	557-59-5	Negative	Out of Euclidean Distance and Leverages	Low reliability
544	Octanal	C(CCCC)CCC=O	124-13-0	679	Within Euclidean Distance	Low reliability	128.21	87.0546	533	Undecanedioic acid	C(CC(=O)O)CCCCCCCC(=O)O	1852-04-6	Negative	Within Euclidean Distance and Leverages	Low reliability
545	Glyoxal	C(=O)C=O	107-22-2	1107	Within Euclidean Distance and Leverages	Moderate reliability	58.04	64.2503	534	Heneicosylic Acid	C(CCCCCCCCCCCCC)CCCCCCC(=O)O	2363-71-5	Negative	Out of Euclidean Distance and Leverages	Low reliability
546	Methylglyoxal	C(=O)(C=O)C	78-98-8	3285	Within Euclidean Distance and Leverages	Low reliability	72.06	236.717	535	9-Hexadecenoic acid, (9E)-	C(CC/C=C/CCCCCC)CCCCC(=O)O	10030-73-6	Negative	Within Leverages	Low reliability
547	Isovaleraldehyde	C(C(C)C)C=O	590-86-3	338	Within Euclidean Distance and Leverages	Low reliability	86.13	29.1119	536	2-oxobutanedioic acid	C(=O)(CC(=O)[O-])C(=O)[O-]	149-63-3	Positive	Within Euclidean Distance and Leverages	Low reliability
548	Isobutyraldehyde	C(C=O)(C)C	78-84-2	1495	Within Euclidean Distance and Leverages	Low reliability	72.11	107.804	537	2,6-Diaminopimelic acid	C(C(=O)O)(CCCC(C(=O)O)N)N	583-93-7	Negative	Within Euclidean Distance and Leverages	Low reliability
549	trans-2-Hexenal	C(=C\C=O)/CCC	6728-26-3	541	Within Euclidean Distance and Leverages	Low reliability	98.14	53.0937	538	2-Methyl-3-aminopropanoic acid	C(C(=O)O)(CN)C	144-90-1	Positive	Within Euclidean Distance and Leverages	Low reliability
550	Butyraldehyde	C(CC)C=O	123-72-8	397	Within Euclidean Distance and Leverages	Low reliability	72.11	28.6277	539	2-Oxooctanoic acid	C(=O)(CCCCCC)C(=O)O	328-51-8	Negative	Within Euclidean Distance and Leverages	Low reliability
551	Dodecyl aldehyde	C(CCCCCC)CCCCC=O	112-54-9	1187	Within Euclidean Distance	Low reliability	184.32	218.788	540	Pentanedioic acid, 2-methyl-	C(CCC(=O)O)(C(=O)O)C	18069-17-5	Negative	Within Euclidean Distance and Leverages	Low reliability
552	Propionaldehyde	C(C=O)C	123-38-6	2599	Within Euclidean Distance and Leverages	Low reliability	58.08	150.95	541	Butanoic acid, 2,3-dioxo- (9CI)	C(=O)(C(=O)C)C(=O)O	4374-46-3	Positive	Within Euclidean Distance and Leverages	Low reliability
553	Undecanal	C(CCCCC=O)CCCCC	112-44-7	1856	Within Euclidean Distance	Low reliability	170.29	316.058	542	Hexanoic acid, 2-ethyl-3-methyl-	C(C(CCC)C)(C(=O)O)CC	74581-94-5	Negative	Within Euclidean Distance and Leverages	Low reliability
554	Valeraldehyde	C(CC=O)CC	110-62-3	296	Within Euclidean Distance and Leverages	Low reliability	86.13	25.4945	543	Decyl aldehyde	C(CCCCC)CCCC=O	112-31-2	Negative	Within Euclidean Distance and Leverages	Low reliability
555	3-Hydroxy-2,2-dimethylpropanal	C(CO)(C=O)(C)C	597-31-9	583	Within Euclidean Distance and Leverages	Low reliability	102.13	59.5418	544	Octanal	C(CCCC)CCC=O	124-13-0	Negative	Within Euclidean Distance and Leverages	Low reliability
556	3-hydroxy-butana	C(C(C)O)C=O	107-89-1	987	Within Euclidean Distance and Leverages	Low reliability	88.11	86.9646	545	Glyoxal	C(=O)C=O	107-22-2	Positive	Within Euclidean Distance and Leverages	Moderate reliability
557	4-hydroxybutyraldehyde	C(CC=O)CO	25714-71-0	614	Within Euclidean Distance and Leverages	Low reliability	88.11	54.0995	546	Methylglyoxal	C(=O)(C=O)C	78-98-8	Positive	Within Euclidean Distance and Leverages	Low reliability
558	Butanal, 2-hydroxy-	C(CC)(C=O)O	37428-67-4	2155	Within Euclidean Distance and Leverages	Low reliability	88.11	189.877	547	Isovaleraldehyde	C(C(C)C)C=O	590-86-3	Negative	Within Euclidean Distance and Leverages	Low reliability
559	Crotonaldehyde	C(=CC)C=O	4170-30-3	675	Within Euclidean Distance and Leverages	Low reliability	70.09	47.3108	548	Isobutyraldehyde	C(C=O)(C)C	78-84-2	Positive	Within Euclidean Distance and Leverages	Low reliability
560	Hexanal	C(CCC)CC=O	66-25-1	290	Within Euclidean Distance	Low reliability	100.16	29.0464	549	trans-2-Hexenal	C(=C\C=O)/CCC	6728-26-3	Negative	Within Euclidean Distance and Leverages	Low reliability
561	Succindialdehyde	C(CC=O)C=O	638-37-9	1598	Within Euclidean Distance and Leverages	Low reliability	86.09	137.572	550	Butyraldehyde	C(CC)C=O	123-72-8	Positive	Within Euclidean Distance and Leverages	Low reliability
562	Trans-2-Nonenal	C(C/C=C/C=O)CCCC	18829-56-6	2458	Within Euclidean Distance	Low reliability	140.22	344.661	551	Dodecyl aldehyde	C(CCCCCC)CCCCC=O	112-54-9	Negative	Within Euclidean Distance and Leverages	Low reliability
563	Tridecanal	C(CCCCCC=O)CCCCCC	10486-19-8	2229	Within Euclidean Distance	Low reliability	198.34	442.1	552	Propionaldehyde	C(C=O)C	123-38-6	Positive	Within Euclidean Distance and Leverages	Low reliability
564	Acetaldehyde	C(=O)C	75-07-0	4248	Within Euclidean Distance and Leverages	Low reliability	44.05	187.124	553	Undecanal	C(CCCCC=O)CCCCC	112-44-7	Negative	Within Euclidean Distance and Leverages	Low reliability
565	Formaldehyde	C=O	50-00-0	1601	Within Euclidean Distance and Leverages	Low reliability	30.026	48.0716	554	Valeraldehyde	C(CC=O)CC	110-62-3	Negative	Within Euclidean Distance and Leverages	Low reliability
566	(E)-2-Octenal	C(CCCC)/C=C/C=O	2548-87-0	751	Within Euclidean Distance and Leverages	Low reliability	126.2	94.7762	555	3-Hydroxy-2,2-dimethylpropanal	C(CO)(C=O)(C)C	597-31-9	Negative	Within Euclidean Distance and Leverages	Low reliability
567	Pentanal,3-methyl-	C(CC=O)(CC)C	15877-57-3	387	Within Euclidean Distance and Leverages	Low reliability	100.16	38.7619	556	3-hydroxy-butana	C(C(C)O)C=O	107-89-1	Positive	Within Euclidean Distance and Leverages	Low reliability
568	Methacrolein	C(=C)(C=O)C	78-85-3	1495	Within Euclidean Distance and Leverages	Low reliability	70.09	104.785	557	4-hydroxybutyraldehyde	C(CC=O)CO	25714-71-0	Negative	Within Euclidean Distance and Leverages	Low reliability
569	Tiglic aldehyde	C(=CC)(C=O)C	1115-11-3	2092	Within Euclidean Distance and Leverages	Low reliability	84.12	175.979	558	Butanal, 2-hydroxy-	C(CC)(C=O)O	37428-67-4	Negative	Within Euclidean Distance and Leverages	Low reliability
570	1-tetradecylaldehyde	C(CCCCCCC)CCCCCC=O	124-25-4	3522	Within Euclidean Distance	Low reliability	212.37	747.967	559	Crotonaldehyde	C(=CC)C=O	4170-30-3	Negative	Within Euclidean Distance and Leverages	Low reliability
571	2-Methylbutyraldehyde	C(CC)(C=O)C	96-17-3	507	Within Euclidean Distance and Leverages	Low reliability	86.13	43.6679	560	Hexanal	C(CCC)CC=O	66-25-1	Negative	Within Euclidean Distance and Leverages	Low reliability
572	Glycoaldehyde	C(C=O)O	141-46-8	744	Within Euclidean Distance and Leverages	Low reliability	60.05	44.6772	561	Succindialdehyde	C(CC=O)C=O	638-37-9	Positive	Within Euclidean Distance and Leverages	Low reliability
573	Heptaldehyde	C(CCC=O)CCC	111-71-7	1361	Within Euclidean Distance	Low reliability	114.19	155.413	562	Trans-2-Nonenal	C(C/C=C/C=O)CCCC	18829-56-6	Negative	Within Euclidean Distance and Leverages	Low reliability
574	hex-2-enal	C(=CC=O)CCC	505-57-7	541	Within Euclidean Distance and Leverages	Low reliability	98.14	53.0937	563	Tridecanal	C(CCCCCC=O)CCCCCC	10486-19-8	Negative	Within Euclidean Distance and Leverages	Low reliability
575	Methyl valeraldehyde	C(CCC)(C=O)C	123-15-9	554	Within Euclidean Distance and Leverages	Low reliability	100.16	55.4886	564	Acetaldehyde	C(=O)C	75-07-0	Positive	Within Euclidean Distance and Leverages	Low reliability
576	2-oxobutanal	C(=O)(CC)C=O	4417-81-6	1505	Within Euclidean Distance and Leverages	Low reliability	86.09	129.565	565	Formaldehyde	C=O	50-00-0	Negative	Within Euclidean Distance and Leverages	Low reliability
577	2-methyl-decana	C(CCC(C=O)C)CCCCC	19009-56-4	1856	Within Euclidean Distance	Low reliability	170.29	316.058	566	(E)-2-Octenal	C(CCCC)/C=C/C=O	2548-87-0	Negative	Within Euclidean Distance and Leverages	Low reliability
578	hexadecanal	C(CCCCCCCC)CCCCCCC=O	629-80-1	2974	Out of Euclidean Distance and Leverages	Low reliability	240.42	715.009	567	Pentanal,3-methyl-	C(CC=O)(CC)C	15877-57-3	Negative	Within Euclidean Distance and Leverages	Low reliability
579	(Z)-13-octadecenal	C(CCC/C=C\CCCC)CCCCCCCC=O	58594-45-9	2443	Out of Euclidean Distance and Leverages	Low reliability	266.5	651.06	568	Methacrolein	C(=C)(C=O)C	78-85-3	Positive	Within Euclidean Distance and Leverages	Low reliability
580	Butanal, 2,2-diethyl-	C(CC)(CC)(CC)C=O	26254-89-7	259	Within Euclidean Distance and Leverages	Low reliability	128.21	33.2064	569	Tiglic aldehyde	C(=CC)(C=O)C	1115-11-3	Negative	Within Euclidean Distance and Leverages	Low reliability
581	4-oxononan-1-al	C(C(=O)CCC=O)CCCC	74327-29-0	1852	Within Euclidean Distance	Low reliability	156.22	289.319	570	1-tetradecylaldehyde	C(CCCCCCC)CCCCCC=O	124-25-4	Negative	Within Euclidean Distance and Leverages	Low reliability
582	2,3-Dimethylpentaldehyde	C(C(C=O)C)(CC)C	32749-94-3	771	Within Euclidean Distance and Leverages	Low reliability	114.19	88.0405	571	2-Methylbutyraldehyde	C(CC)(C=O)C	96-17-3	Negative	Within Euclidean Distance and Leverages	Low reliability
583	2-​Butenedial, (2Z)​-	C(=C\C=O)\C=O	3675-13-6	1449	Within Euclidean Distance and Leverages	Low reliability	84.07	121.817	572	Glycoaldehyde	C(C=O)O	141-46-8	Positive	Within Euclidean Distance and Leverages	Low reliability
584	2-Butenedial, 2,​3-​dimethyl-	C(=C(C=O)C)(C=O)C	1094239-48-1	1408	Within Euclidean Distance and Leverages	Low reliability	112.13	157.879	573	Heptaldehyde	C(CCC=O)CCC	111-71-7	Negative	Within Euclidean Distance and Leverages	Low reliability
585	2-Butenedial,2-methyl-, (2Z)-	C(=C\C=O)(\C=O)/C	21973-20-6	637	Within Euclidean Distance and Leverages	Low reliability	98.1	62.4897	574	hex-2-enal	C(=CC=O)CCC	505-57-7	Negative	Within Euclidean Distance and Leverages	Low reliability
586	nonanal	C(CCCC=O)CCCC	124-19-6	2591	Within Euclidean Distance	Low reliability	142.24	368.544	575	Methyl valeraldehyde	C(CCC)(C=O)C	123-15-9	Negative	Within Euclidean Distance and Leverages	Low reliability
587	2-ethyl-1-hexanal	C(CCCC)(CC)C=O	123-05-7	1048	Within Euclidean Distance	Low reliability	128.21	134.364	576	2-oxobutanal	C(=O)(CC)C=O	4417-81-6	Positive	Within Euclidean Distance and Leverages	Low reliability
588	tert-Butyl methyl ether	C(OC)(C)(C)C	1634-04-4	4565	Within Euclidean Distance and Leverages	Low reliability	88.15	402.405	577	2-methyl-decana	C(CCC(C=O)C)CCCCC	19009-56-4	Negative	Within Euclidean Distance and Leverages	Low reliability
589	2-Ethoxyethyl ether	O(CCOCC)CCOCC	112-36-7	1509	Within Euclidean Distance	Low reliability	162.23	244.805	578	hexadecanal	C(CCCCCCCC)CCCCCCC=O	629-80-1	Negative	Within Leverages	Low reliability
590	1,1-Dimethoxyethane	C(OC)(OC)C	534-15-6	3451	Within Euclidean Distance and Leverages	Low reliability	90.12	311.004	579	(Z)-13-octadecenal	C(CCC/C=C\CCCC)CCCCCCCC=O	58594-45-9	Negative	Out of Euclidean Distance and Leverages	Low reliability
591	Diethylene Glycol Dimethyl Ether	O(CCOC)CCOC	111-96-6	1268	Within Euclidean Distance	Low reliability	134.17	170.128	580	Butanal, 2,2-diethyl-	C(CC)(CC)(CC)C=O	26254-89-7	Negative	Within Euclidean Distance and Leverages	Low reliability
592	3-Methoxy-3-methylhexane	C(CCC)(CC)(OC)C	74630-91-4	1207	Within Euclidean Distance and Leverages	Low reliability	130.23	157.188	581	4-oxononan-1-al	C(C(=O)CCC=O)CCCC	74327-29-0	Positive	Within Euclidean Distance and Leverages	Low reliability
593	1-Ethoxy-4,4-dimethyl-2-pentene	C(=CC(C)(C)C)COCC	55702-60-8	1253	Within Euclidean Distance and Leverages	Low reliability	142.24	178.227	582	2,3-Dimethylpentaldehyde	C(C(C=O)C)(CC)C	32749-94-3	Negative	Within Euclidean Distance and Leverages	Low reliability
594	1-Pentene, 3-​methoxy-​3-​methyl-	C(CC)(C=C)(OC)C	134777-62-1	496	Within Euclidean Distance and Leverages	Low reliability	114.19	56.6382	583	2-​Butenedial, (2Z)​-	C(=C\C=O)\C=O	3675-13-6	Positive	Within Euclidean Distance and Leverages	Low reliability
595	Pentane, 1-(2-propen-1-yloxy)-_x000D_	C(CCCC)OCC=C	23186-70-1	1019	Within Euclidean Distance	Low reliability	128.21	130.646	584	2-Butenedial, 2,​3-​dimethyl-	C(=C(C=O)C)(C=O)C	1094239-48-1	Negative	Within Euclidean Distance and Leverages	Low reliability
596	Acetonitrile, oxo- (9CI)	C(#N)C=O	4471-47-0	2720	Within Euclidean Distance and Leverages	Low reliability	55.04	149.709	585	2-Butenedial,2-methyl-, (2Z)-	C(=C\C=O)(\C=O)/C	21973-20-6	Negative	Within Euclidean Distance and Leverages	Low reliability
597	3-Methylbutanenitrile	C(C(C)C)C#N	625-28-5	3013	Within Euclidean Distance and Leverages	Low reliability	83.13	250.471	586	nonanal	C(CCCC=O)CCCC	124-19-6	Negative	Within Euclidean Distance and Leverages	Low reliability
598	Isobutyronitrile	C(C#N)(C)C	78-82-0	6955	Within Euclidean Distance and Leverages	Low reliability	69.11	480.66	587	2-ethyl-1-hexanal	C(CCCC)(CC)C=O	123-05-7	Negative	Within Euclidean Distance and Leverages	Low reliability
599	1-Heptanonitrile	C(CCC#N)CCC	629-08-3	2035	Within Euclidean Distance and Leverages	Low reliability	111.18	226.251	588	tert-Butyl methyl ether	C(OC)(C)(C)C	1634-04-4	Positive	Within Euclidean Distance and Leverages	Low reliability
600	hexadecanenitrile	C(CCCCCCCC)CCCCCCC#N	629-79-8	5503	Within Euclidean Distance	Low reliability	237.42	1306.52	589	2-Ethoxyethyl ether	O(CCOCC)CCOCC	112-36-7	Positive	Within Euclidean Distance and Leverages	Low reliability
601	Propionitrile	C(C#N)C	107-12-0	9250	Within Euclidean Distance and Leverages	Low reliability	55.08	509.49	590	1,1-Dimethoxyethane	C(OC)(OC)C	534-15-6	Positive	Within Euclidean Distance and Leverages	Low reliability
602	Hexanenitrile	C(CCC)CC#N	628-73-9	745	Within Euclidean Distance and Leverages	Low reliability	97.16	72.3842	591	Diethylene Glycol Dimethyl Ether	O(CCOC)CCOC	111-96-6	Negative	Within Euclidean Distance and Leverages	Low reliability
603	Lactonitrile	C(C#N)(C)O	78-97-7	26689	Within Euclidean Distance and Leverages	Low reliability	71.08	1897.05	592	3-Methoxy-3-methylhexane	C(CCC)(CC)(OC)C	74630-91-4	Positive	Within Euclidean Distance and Leverages	Low reliability
604	Octanenitrile	C(CCCC)CCC#N	124-12-9	1382	Within Euclidean Distance	Low reliability	125.21	173.04	593	1-Ethoxy-4,4-dimethyl-2-pentene	C(=CC(C)(C)C)COCC	55702-60-8	Positive	Within Euclidean Distance and Leverages	Low reliability
605	Glutaronitrile	C(CC#N)CC#N	544-13-8	872	Within Euclidean Distance and Leverages	Low reliability	94.11	82.0639	594	1-Pentene, 3-​methoxy-​3-​methyl-	C(CC)(C=C)(OC)C	134777-62-1	Positive	Within Euclidean Distance and Leverages	Low reliability
606	2,2-dimethyl-2,2-azodipropiononitrile	C(/N=N/C(C#N)(C)C)(C#N)(C)C	78-67-1	6901	Within Euclidean Distance and Leverages	Low reliability	164.21	1133.21	595	Pentane, 1-(2-propen-1-yloxy)-_x000D_	C(CCCC)OCC=C	23186-70-1	Negative	Within Euclidean Distance and Leverages	Low reliability
607	n-Nonanenitrile	C(CCCC#N)CCCC	2243-27-8	3540	Within Euclidean Distance	Low reliability	139.24	492.91	596	Acetonitrile, oxo- (9CI)	C(#N)C=O	4471-47-0	Negative	Within Euclidean Distance and Leverages	Low reliability
608	Succinonitrile	C(CC#N)C#N	110-61-2	10528	Within Euclidean Distance and Leverages	Low reliability	80.09	843.188	597	3-Methylbutanenitrile	C(C(C)C)C#N	625-28-5	Negative	Within Euclidean Distance and Leverages	Low reliability
609	Undecanoic acid nitrile	C(CCCCC#N)CCCCC	2244-07-7	2580	Within Euclidean Distance	Low reliability	167.29	431.608	598	Isobutyronitrile	C(C#N)(C)C	78-82-0	Positive	Within Euclidean Distance and Leverages	Low reliability
610	Malononitrile	C(C#N)C#N	109-77-3	6493	Within Euclidean Distance and Leverages	Low reliability	66.06	428.928	599	1-Heptanonitrile	C(CCC#N)CCC	629-08-3	Negative	Within Euclidean Distance and Leverages	Low reliability
612	2-Ethylhexanol	C(CCCC)(CC)CO	104-76-7	963	Within Euclidean Distance	Low reliability	130.23	125.411	600	hexadecanenitrile	C(CCCCCCCC)CCCCCCC#N	629-79-8	Negative	Within Leverages	Low reliability
613	1,3,5-Pentanetriol	C(CCO)(CCO)O	4328-94-3	1334	Within Euclidean Distance and Leverages	Low reliability	120.15	160.28	601	Propionitrile	C(C#N)C	107-12-0	Positive	Within Euclidean Distance and Leverages	Low reliability
614	2,2-Dimethyl-1,3-propanediol	C(CO)(CO)(C)C	126-30-7	338	Within Euclidean Distance and Leverages	Low reliability	104.15	35.2027	602	Hexanenitrile	C(CCC)CC#N	628-73-9	Negative	Within Euclidean Distance and Leverages	Low reliability
615	2,5-Hexanediol	C(CC(C)O)C(C)O	2935-44-6	418	Within Euclidean Distance and Leverages	Low reliability	118.17	49.3951	603	Lactonitrile	C(C#N)(C)O	78-97-7	Positive	Within Euclidean Distance and Leverages	Low reliability
616	2-Butoxyethanol	C(OCCO)CCC	111-76-2	929	Within Euclidean Distance	Low reliability	118.17	109.78	604	Octanenitrile	C(CCCC)CCC#N	124-12-9	Negative	Within Euclidean Distance and Leverages	Low reliability
617	Diethanolamine	N(CCO)CCO	111-42-2	1877	Within Euclidean Distance and Leverages	Low reliability	105.14	197.348	605	Glutaronitrile	C(CC#N)CC#N	544-13-8	Positive	Within Euclidean Distance and Leverages	Low reliability
618	trans-2-Decenol	C(CCCCC)C/C=C/CO	18409-18-2	1331	Within Euclidean Distance	Low reliability	156.26	207.982	606	2,2-dimethyl-2,2-azodipropiononitrile	C(/N=N/C(C#N)(C)C)(C#N)(C)C	78-67-1	Positive	Within Euclidean Distance and Leverages	Low reliability
619	1-Butanol	C(CC)CO	71-36-3	363	Within Euclidean Distance and Leverages	Low reliability	74.12	26.9056	607	n-Nonanenitrile	C(CCCC#N)CCCC	2243-27-8	Negative	Within Euclidean Distance and Leverages	Low reliability
620	1-Octen-3-ol	C(CCCCC)(C=C)O	3391-86-4	944	Within Euclidean Distance and Leverages	Low reliability	128.21	121.03	608	Succinonitrile	C(CC#N)C#N	110-61-2	Positive	Within Euclidean Distance and Leverages	Low reliability
621	2,4,7,9-Tetramethyl-5-decyne-4,7-diol	C(C#CC(CC(C)C)(C)O)(CC(C)C)(C)O	126-86-3	2055	Within Euclidean Distance and Leverages	Low reliability	226.35	465.149	609	Undecanoic acid nitrile	C(CCCCC#N)CCCCC	2244-07-7	Negative	Within Euclidean Distance and Leverages	Low reliability
622	2,6-dimethyl-heptan-3-ol	C(CCC(C)C)(C(C)C)O	19549-73-6	992	Within Euclidean Distance and Leverages	Low reliability	144.25	143.096	610	Malononitrile	C(C#N)C#N	109-77-3	Positive	Within Euclidean Distance and Leverages	Low reliability
623	2-ethyl-4-methylpentan-1-ol	C(CC(C)C)(CC)CO	106-67-2	327	Within Euclidean Distance and Leverages	Low reliability	130.23	42.5852	612	2-Ethylhexanol	C(CCCC)(CC)CO	104-76-7	Negative	Within Euclidean Distance and Leverages	Low reliability
624	2-methylpent-2-en-1-ol	C(=CCC)(CO)C	1610-29-3	1075	Within Euclidean Distance and Leverages	Low reliability	100.16	107.672	613	1,3,5-Pentanetriol	C(CCO)(CCO)O	4328-94-3	Positive	Within Euclidean Distance and Leverages	Low reliability
625	2-Octyl-1-dodecanol	C(CCCCCCCCCC)(CCCCCCCC)CO	5333-42-6	327	Out of Euclidean Distance and Leverages	Low reliability	298.5	97.6095	614	2,2-Dimethyl-1,3-propanediol	C(CO)(CO)(C)C	126-30-7	Negative	Within Euclidean Distance and Leverages	Low reliability
626	3,6,9,12-tetraoxahexadecan-1-ol	C(COCCOCCO)OCCOCCCC	1559-34-8	3499	Within Euclidean Distance	Low reliability	250.33	875.905	615	2,5-Hexanediol	C(CC(C)O)C(C)O	2935-44-6	Positive	Within Euclidean Distance and Leverages	Low reliability
627	3-Methyl-2-pentanol	C(C(C)O)(CC)C	565-60-6	424	Within Euclidean Distance and Leverages	Low reliability	102.17	43.3201	616	2-Butoxyethanol	C(OCCO)CCC	111-76-2	Negative	Within Euclidean Distance and Leverages	Low reliability
628	4-Penten-2-ol, 3-methyl-	C(C(C)O)(C=C)C	1569-59-1	648	Within Euclidean Distance and Leverages	Low reliability	100.16	64.9037	617	Diethanolamine	N(CCO)CCO	111-42-2	Negative	Within Euclidean Distance and Leverages	Low reliability
629	Butyldiglycol	C(COCCO)OCCCC	112-34-5	1727	Within Euclidean Distance	Low reliability	162.23	280.171	618	trans-2-Decenol	C(CCCCC)C/C=C/CO	18409-18-2	Negative	Within Euclidean Distance and Leverages	Low reliability
630	Triethylene glycol monobutyl ethe	C(OCCOCCO)COCCCC	143-22-6	3819	Within Euclidean Distance	Low reliability	206.28	787.783	619	1-Butanol	C(CC)CO	71-36-3	Negative	Within Euclidean Distance and Leverages	Low reliability
631	Trimethylolpropane	C(CC)(CO)(CO)CO	77-99-6	552	Within Euclidean Distance and Leverages	Low reliability	134.17	74.0618	620	1-Octen-3-ol	C(CCCCC)(C=C)O	3391-86-4	Positive	Within Euclidean Distance and Leverages	Low reliability
632	Triisopropylene glycol monomethyl ether	C(COC(COC)C)(OCC(C)O)C	20324-33-8	716	Within Euclidean Distance and Leverages	Low reliability	206.28	147.696	621	2,4,7,9-Tetramethyl-5-decyne-4,7-diol	C(C#CC(CC(C)C)(C)O)(CC(C)C)(C)O	126-86-3	Positive	Within Euclidean Distance and Leverages	Low reliability
633	1-Dodecanol, 2-ethyl-	C(CCCCCCCCCC)(CC)CO	19780-33-7	3689	Within Euclidean Distance	Low reliability	214.39	790.885	622	2,6-dimethyl-heptan-3-ol	C(CCC(C)C)(C(C)C)O	19549-73-6	Positive	Within Euclidean Distance and Leverages	Low reliability
634	1-Hepten-4-ol	C(CCC)(CC=C)O	3521-91-3	1389	Within Euclidean Distance and Leverages	Low reliability	114.19	158.61	623	2-ethyl-4-methylpentan-1-ol	C(CC(C)C)(CC)CO	106-67-2	Negative	Within Euclidean Distance and Leverages	Low reliability
635	1-Hexadecanol	C(CCCCCCCC)CCCCCCCO	36653-82-4	2856	Out of Euclidean Distance and Leverages	Low reliability	242.44	692.409	624	2-methylpent-2-en-1-ol	C(=CCC)(CO)C	1610-29-3	Negative	Within Euclidean Distance and Leverages	Low reliability
636	1-Undecanol	C(CCCCCO)CCCCC	112-42-5	2028	Within Euclidean Distance	Low reliability	172.31	349.445	625	2-Octyl-1-dodecanol	C(CCCCCCCCCC)(CCCCCCCC)CO	5333-42-6	Negative	Out of Euclidean Distance and Leverages	Low reliability
637	2-Hexanol, 2,5-dimethyl-	C(C(C)(C)O)CC(C)C	3730-60-7	761	Within Euclidean Distance and Leverages	Low reliability	130.23	99.105	626	3,6,9,12-tetraoxahexadecan-1-ol	C(COCCOCCO)OCCOCCCC	1559-34-8	Negative	Within Euclidean Distance and Leverages	Low reliability
638	3,4-Dimethyl-5-hexen-3-ol	C(C(C=C)C)(CC)(C)O	1569-45-5	604	Within Euclidean Distance and Leverages	Low reliability	128.21	77.4388	627	3-Methyl-2-pentanol	C(C(C)O)(CC)C	565-60-6	Positive	Within Euclidean Distance and Leverages	Low reliability
639	3,7,11-trimethyldodecyl alcohol	C(CCCC(CCO)C)(CCCC(C)C)C	6750-34-1	3474	Within Euclidean Distance	Low reliability	228.41	793.496	628	4-Penten-2-ol, 3-methyl-	C(C(C)O)(C=C)C	1569-59-1	Positive	Within Euclidean Distance and Leverages	Low reliability
640	2-Methyl-2-butanol	C(CC)(C)(C)O	75-85-4	2270	Within Euclidean Distance and Leverages	Low reliability	88.15	200.101	629	Butyldiglycol	C(COCCO)OCCCC	112-34-5	Negative	Within Euclidean Distance and Leverages	Low reliability
641	1-Heptanol,5-methyl-,(S)-	[C@@H](CCCCO)(CC)C	57803-73-3	1679	Within Euclidean Distance and Leverages	Low reliability	130.23	218.656	630	Triethylene glycol monobutyl ethe	C(OCCOCCO)COCCCC	143-22-6	Positive	Within Euclidean Distance and Leverages	Low reliability
642	5-methyl-2-heptanol	C(CCC(C)O)(CC)C	54630-50-1	1116	Within Euclidean Distance and Leverages	Low reliability	130.23	145.337	631	Trimethylolpropane	C(CC)(CO)(CO)CO	77-99-6	Negative	Within Euclidean Distance and Leverages	Low reliability
643	3-Octen-2-ol	C(=CC(C)O)CCCC	76649-14-4	1076	Within Euclidean Distance and Leverages	Low reliability	128.21	137.954	632	Triisopropylene glycol monomethyl ether	C(COC(COC)C)(OCC(C)O)C	20324-33-8	Positive	Within Euclidean Distance and Leverages	Low reliability
644	6-Undecanol	C(C(CCCCC)O)CCCC	23708-56-7	500	Within Euclidean Distance	Low reliability	172.31	86.155	633	1-Dodecanol, 2-ethyl-	C(CCCCCCCCCC)(CC)CO	19780-33-7	Negative	Within Euclidean Distance and Leverages	Low reliability
645	2-ethylhex-2-enol	C(=CCCC)(CC)CO	50639-00-4	971	Within Euclidean Distance and Leverages	Low reliability	128.21	124.492	634	1-Hepten-4-ol	C(CCC)(CC=C)O	3521-91-3	Positive	Within Euclidean Distance and Leverages	Low reliability
646	N-ethyl-N-phenylnitrous amide	N(CC)(N=O)c1ccccc1	612-64-6	2428	Within Euclidean Distance and Leverages	Low reliability	150.18	364.637	635	1-Hexadecanol	C(CCCCCCCC)CCCCCCCO	36653-82-4	Negative	Within Leverages	Low reliability
647	N-nitrosodiphenylamine	N(N=O)(c1ccccc1)c1ccccc1	86-30-6	1448	Within Euclidean Distance and Leverages	Low reliability	198.22	287.023	636	1-Undecanol	C(CCCCCO)CCCCC	112-42-5	Negative	Within Euclidean Distance and Leverages	Low reliability
648	N-Nitroso-N-propylbenzenamine	N(CCC)(N=O)c1ccccc1	19788-34-2	1053	Within Euclidean Distance and Leverages	Low reliability	164.2	172.903	637	2-Hexanol, 2,5-dimethyl-	C(C(C)(C)O)CC(C)C	3730-60-7	Positive	Within Euclidean Distance and Leverages	Low reliability
649	N-Acetyl 4-bromo-3-chloroaniline	N(C(=O)C)c1cc(Cl)c(cc1)Br	22459-81-0	1286	Within Euclidean Distance and Leverages	Low reliability	248.5	319.571	638	3,4-Dimethyl-5-hexen-3-ol	C(C(C=C)C)(CC)(C)O	1569-45-5	Positive	Within Euclidean Distance and Leverages	Low reliability
650	4-Hydroxyphenylacetamide	C(C(=O)N)c1ccc(cc1)O	17194-82-0	8425	Within Euclidean Distance and Leverages	Moderate reliability	151.16	1273.52	639	3,7,11-trimethyldodecyl alcohol	C(CCCC(CCO)C)(CCCC(C)C)C	6750-34-1	Negative	Within Euclidean Distance and Leverages	Low reliability
651	2-amino-2-phenylacetamide	C(C(=O)N)(N)c1ccccc1	700-63-0	1706	Within Euclidean Distance and Leverages	Moderate reliability	150.18	256.207	640	2-Methyl-2-butanol	C(CC)(C)(C)O	75-85-4	Positive	Within Euclidean Distance and Leverages	Low reliability
652	2-Phenyl-2-hydroxyacetamide	C(C(=O)N)(O)c1ccccc1	4410-31-5	2399	Within Euclidean Distance and Leverages	Low reliability	151.16	362.633	641	1-Heptanol,5-methyl-,(S)-	[C@@H](CCCCO)(CC)C	57803-73-3	Negative	Within Euclidean Distance and Leverages	Low reliability
653	2-Phenylacetamide	C(C(=O)N)c1ccccc1	103-81-1	10605	Within Euclidean Distance and Leverages	High reliability	135.16	1433.37	642	5-methyl-2-heptanol	C(CCC(C)O)(CC)C	54630-50-1	Positive	Within Euclidean Distance and Leverages	Low reliability
654	Benzamide	C(=O)(N)c1ccccc1	55-21-0	2879	Within Euclidean Distance and Leverages	Moderate reliability	121.14	348.762	643	3-Octen-2-ol	C(=CC(C)O)CCCC	76649-14-4	Positive	Within Euclidean Distance and Leverages	Low reliability
655	N,N'-(6,6'-dihydroxy-[1,1'-biphenyl]-3,3'-diyl)diacetamide	Oc1c(cc(cc1)NC(=O)C)c1cc(NC(=O)C)ccc1O	98966-14-4	17742	Within Euclidean Distance and Leverages	Low reliability	300.31	5328.1	644	6-Undecanol	C(C(CCCCC)O)CCCC	23708-56-7	Negative	Within Euclidean Distance and Leverages	Low reliability
656	Benzoyl hydrazine	C(=O)(NN)c1ccccc1	613-94-5	4652	Within Euclidean Distance and Leverages	Low reliability	136.15	633.37	645	2-ethylhex-2-enol	C(=CCCC)(CC)CO	50639-00-4	Negative	Within Euclidean Distance and Leverages	Low reliability
657	1-Phenyl-1-methylethanol	C(C)(C)(O)c1ccccc1	617-94-7	2936	Within Euclidean Distance and Leverages	Moderate reliability	136.19	399.854	646	N-ethyl-N-phenylnitrous amide	N(CC)(N=O)c1ccccc1	612-64-6	Negative	Within Euclidean Distance and Leverages	Moderate reliability
658	3-Phenoxy-1,2-propanediol	O(CC(CO)O)c1ccccc1	538-43-2	4043	Within Euclidean Distance and Leverages	Low reliability	168.19	679.992	648	N-Nitroso-N-propylbenzenamine	N(CCC)(N=O)c1ccccc1	19788-34-2	Negative	Within Euclidean Distance and Leverages	Moderate reliability
659	4-(1-methylethyl)-benzenemethano	C(C)(C)c1ccc(cc1)CO	536-60-7	2735	Within Euclidean Distance and Leverages	Low reliability	150.22	410.852	649	N-Acetyl 4-bromo-3-chloroaniline	N(C(=O)C)c1cc(Cl)c(cc1)Br	22459-81-0	Positive	Within Euclidean Distance and Leverages	Low reliability
660	5H-dibenzo[a,d]cycloheptene	c12c(C=Cc3c(C1)cccc3)cccc2	256-81-5	144	Within Euclidean Distance and Leverages	Low reliability	192.25	27.684	650	4-Hydroxyphenylacetamide	C(C(=O)N)c1ccc(cc1)O	17194-82-0	Positive	Within Euclidean Distance and Leverages	Low reliability
661	Anthraquinone	O=C1c2c(C(=O)c3c1cccc3)cccc2	84-65-1	50.5	Within Euclidean Distance and Leverages	Moderate reliability	208.21	10.5146	651	2-amino-2-phenylacetamide	C(C(=O)N)(N)c1ccccc1	700-63-0	Negative	Within Euclidean Distance and Leverages	Low reliability
662	Benzocyclobutene	c12c(CC1)cccc2	694-87-1	1488	Within Euclidean Distance and Leverages	Low reliability	104.15	154.975	652	2-Phenyl-2-hydroxyacetamide	C(C(=O)N)(O)c1ccccc1	4410-31-5	Negative	Within Euclidean Distance and Leverages	Low reliability
663	Benzeneethanimine, N-chloro- (9CI)	C(/C=N/Cl)c1ccccc1	144742-38-1	1349	Within Euclidean Distance and Leverages	Low reliability	153.61	207.22	653	2-Phenylacetamide	C(C(=O)N)c1ccccc1	103-81-1	Positive	Within Euclidean Distance and Leverages	Low reliability
664	1H-Inden-5-ol, 2,3-dihydro-1-(3-hydroxy-4-methylphenyl)-1,3,3,6-tetramethyl-	CC1(c2c(C(C1)(C)C)cc(c(c2)C)O)c1cc(O)c(cc1)C	107535-11-5	30	Within Euclidean Distance and Leverages	Low reliability	296.4	8.892	654	Benzamide	C(=O)(N)c1ccccc1	55-21-0	Positive	Within Euclidean Distance and Leverages	Low reliability
665	Benzeneethanimidamide, N-​chloro-	C(C(=N)NCl)c1ccccc1	49773-40-2	1036	Within Euclidean Distance and Leverages	Low reliability	168.62	174.69	655	N,N'-(6,6'-dihydroxy-[1,1'-biphenyl]-3,3'-diyl)diacetamide	Oc1c(cc(cc1)NC(=O)C)c1cc(NC(=O)C)ccc1O	98966-14-4	Positive	Within Euclidean Distance and Leverages	Low reliability
666	Phenylethylidenehydrazine	C(/C=N/N)c1ccccc1	29443-41-2	14845	Within Euclidean Distance and Leverages	Low reliability	134.18	1991.9	656	Benzoyl hydrazine	C(=O)(NN)c1ccccc1	613-94-5	Negative	Within Euclidean Distance and Leverages	Low reliability
667	Bromochlorophenol Blue	O=S1(=O)OC(c2c1cccc2)(c1cc(Br)c(c(c1)Cl)O)c1cc(Br)c(c(c1)Cl)O	2553-71-1	595	Within Euclidean Distance and Leverages	Low reliability	581.1	345.755	657	1-Phenyl-1-methylethanol	C(C)(C)(O)c1ccccc1	617-94-7	Positive	Within Euclidean Distance and Leverages	Low reliability
668	3,4-Dichlorophenethylamine	C(CN)c1cc(Cl)c(cc1)Cl	21581-45-3	1219	Within Euclidean Distance and Leverages	Moderate reliability	190.07	231.695	658	3-Phenoxy-1,2-propanediol	O(CC(CO)O)c1ccccc1	538-43-2	Negative	Within Euclidean Distance and Leverages	Low reliability
669	1-Indanone	O=C1c2c(CC1)cccc2	83-33-0	530	Within Euclidean Distance and Leverages	High reliability	132.16	70.0448	659	4-(1-methylethyl)-benzenemethano	C(C)(C)c1ccc(cc1)CO	536-60-7	Negative	Within Euclidean Distance and Leverages	Low reliability
670	9-Fluorenone	O=C1c2c(c3c1cccc3)cccc2	486-25-9	29.2	Within Euclidean Distance and Leverages	Moderate reliability	180.2	5.26184	660	5H-dibenzo[a,d]cycloheptene	c12c(C=Cc3c(C1)cccc3)cccc2	256-81-5	Positive	Within Euclidean Distance and Leverages	Low reliability
671	1-Hydroxy-9-fluorenone	O=C1c2c(c3c1cccc3)cccc2O	6344-60-1	26	Within Euclidean Distance and Leverages	Low reliability	196.2	5.1012	661	Anthraquinone	O=C1c2c(C(=O)c3c1cccc3)cccc2	84-65-1	Positive	Within Euclidean Distance and Leverages	Low reliability
672	Benzene	c1ccccc1	71-43-2	1495	Within Euclidean Distance and Leverages	Low reliability	78.11	116.774	662	Benzocyclobutene	c12c(CC1)cccc2	694-87-1	Positive	Within Euclidean Distance and Leverages	Low reliability
673	1,2-Propanediol, 2-methyl-3-(phenylmethoxy)-	C(OCC(CO)(C)O)c1ccccc1	32378-82-8	4194	Within Euclidean Distance and Leverages	Low reliability	196.24	823.031	663	Benzeneethanimine, N-chloro- (9CI)	C(/C=N/Cl)c1ccccc1	144742-38-1	Positive	Within Euclidean Distance and Leverages	Low reliability
674	6H-Cyclobuta[jk]​phenanthrene	c12c3c4=CC=CCc4cc1cc2ccc3	500764-31-8	46.3	Within Euclidean Distance and Leverages	Low reliability	200.32	9.27482	664	1H-Inden-5-ol, 2,3-dihydro-1-(3-hydroxy-4-methylphenyl)-1,3,3,6-tetramethyl-	CC1(c2c(C(C1)(C)C)cc(c(c2)C)O)c1cc(O)c(cc1)C	107535-11-5	Negative	Within Euclidean Distance and Leverages	Low reliability
675	Benzenemethanamine, N-dodecyl-N-methyl-	C(N(CCCCCCCCCCCC)C)c1ccccc1	68397-57-9	1205	Within Euclidean Distance	Low reliability	289.5	348.848	665	Benzeneethanimidamide, N-​chloro-	C(C(=N)NCl)c1ccccc1	49773-40-2	Positive	Within Euclidean Distance and Leverages	Low reliability
680	2-(3,5-bis((1,3-dihydroxypropan-2-yl)carbamoyl)-2,4,6-triiodophenoxy)propanoicacid	C(=O)(NC(CO)CO)c1c(I)c(C(=O)NC(CO)CO)c(c(c1I)OC(C(=O)O)C)I	1877263-83-6	1719	Within Euclidean Distance and Leverages	Low reliability	778.1	1337.55	666	Phenylethylidenehydrazine	C(/C=N/N)c1ccccc1	29443-41-2	Positive	Within Euclidean Distance and Leverages	Low reliability
681	1-Methylnaphthalene	Cc1c2c(ccc1)cccc2	90-12-0	731	Within Euclidean Distance and Leverages	Low reliability	142.2	103.948	667	Bromochlorophenol Blue	O=S1(=O)OC(c2c1cccc2)(c1cc(Br)c(c(c1)Cl)O)c1cc(Br)c(c(c1)Cl)O	2553-71-1	Negative	Within Euclidean Distance and Leverages	Low reliability
682	2-Methylnaphthalene	Cc1cc2c(cc1)cccc2	91-57-6	516	Within Euclidean Distance and Leverages	Low reliability	142.2	73.3752	668	3,4-Dichlorophenethylamine	C(CN)c1cc(Cl)c(cc1)Cl	21581-45-3	Negative	Within Euclidean Distance and Leverages	Low reliability
683	Naphthalene	c12c(cccc2)cccc1	91-20-3	1306	Within Euclidean Distance and Leverages	Low reliability	128.17	167.39	669	1-Indanone	O=C1c2c(CC1)cccc2	83-33-0	Positive	Within Euclidean Distance and Leverages	Low reliability
684	1,7-Dimethylnaphthalene_x000D_	Cc1c2c(ccc(c2)C)ccc1	575-37-1	147	Within Euclidean Distance and Leverages	Low reliability	156.22	22.9643	670	9-Fluorenone	O=C1c2c(c3c1cccc3)cccc2	486-25-9	Positive	Within Euclidean Distance and Leverages	Low reliability
686	2-bromo-4-nitrophenol	N(=O)(=O)c1cc(Br)c(cc1)O	5847-59-6	112	Within Euclidean Distance and Leverages	High reliability	218	24.416	671	1-Hydroxy-9-fluorenone	O=C1c2c(c3c1cccc3)cccc2O	6344-60-1	Positive	Within Euclidean Distance and Leverages	Low reliability
687	2-bromo-6-chloro-4-nitrophenol	N(=O)(=O)c1cc(Br)c(c(c1)Cl)O	20294-55-7	78	Within Euclidean Distance and Leverages	Moderate reliability	252.45	19.6911	672	Benzene	c1ccccc1	71-43-2	Positive	Within Euclidean Distance and Leverages	Low reliability
689	2,4-diiodo-6-nitrophenol	N(=O)(=O)c1c(O)c(I)cc(c1)I	20294-48-8	41.1	Within Euclidean Distance and Leverages	Moderate reliability	390.9	16.066	673	1,2-Propanediol, 2-methyl-3-(phenylmethoxy)-	C(OCC(CO)(C)O)c1ccccc1	32378-82-8	Positive	Within Euclidean Distance and Leverages	Low reliability
691	2,4-dibromo-6-nitrobenzenediol	N(=O)(=O)c1c(O)c(Br)c(c(c1)Br)O	484653-20-5	38.7	Within Euclidean Distance and Leverages	Moderate reliability	312.9	12.1092	674	6H-Cyclobuta[jk]​phenanthrene	c12c3c4=CC=CCc4cc1cc2ccc3	500764-31-8	Positive	Within Euclidean Distance and Leverages	Low reliability
692	chlorophenylalanylglycine	C([C@@H](C(=O)NCC(=O)O)NCl)c1ccccc1	201216-27-5	224	Within Euclidean Distance and Leverages	Low reliability	256.69	57.4986	675	Benzenemethanamine, N-dodecyl-N-methyl-	C(N(CCCCCCCCCCCC)C)c1ccccc1	68397-57-9	Negative	Out of Euclidean Distance and Leverages	Low reliability
693	chlorotyrosylglycine	C([C@@H](C(=O)NCC(=O)O)NCl)c1ccc(cc1)O	2095513-62-3	582	Within Euclidean Distance and Leverages	High reliability	272.69	158.706	681	1-Methylnaphthalene	Cc1c2c(ccc1)cccc2	90-12-0	Positive	Within Euclidean Distance and Leverages	Low reliability
694	chlorotyrosylalanine	C([C@@H](C(=O)N[C@H](C(=O)O)C)NCl)c1ccc(cc1)O	2095513-65-6	608	Within Euclidean Distance and Leverages	High reliability	286.71	174.32	682	2-Methylnaphthalene	Cc1cc2c(cc1)cccc2	91-57-6	Positive	Within Euclidean Distance and Leverages	Low reliability
695	dichlorophenylalanylglycine	C([C@@H](C(=O)NCC(=O)O)N(Cl)Cl)c1ccccc1	2095513-64-5	925	Within Euclidean Distance and Leverages	Low reliability	291.13	269.295	683	Naphthalene	c12c(cccc2)cccc1	91-20-3	Positive	Within Euclidean Distance and Leverages	Low reliability
696	dichlorotyrosylglycine	[C@H](Cc1ccc(cc1)O)(C(=O)NCC(=O)O)N(Cl)Cl	2095513-63-4	1286	Within Euclidean Distance and Leverages	High reliability	307.13	394.969	684	1,7-Dimethylnaphthalene_x000D_	Cc1c2c(ccc(c2)C)ccc1	575-37-1	Negative	Within Euclidean Distance and Leverages	Low reliability
697	bromotyrosylglycine	C([C@@H](C(=O)NCC(=O)O)NBr)c1ccc(cc1)O	2415934-48-2	1072	Within Euclidean Distance and Leverages	High reliability	317.14	339.974	685	2,6-dichloro-4-nitrophenol	N(=O)(=O)c1cc(Cl)c(c(c1)Cl)O	618-80-4	Negative	Within Euclidean Distance and Leverages	Low reliability
698	dichlorotyrosylalanine	C([C@@H](C(=O)N[C@H](C(=O)O)C)N(Cl)Cl)c1ccc(cc1)O	2095513-66-7	1255	Within Euclidean Distance and Leverages	High reliability	321.16	403.056	686	2-bromo-4-nitrophenol	N(=O)(=O)c1cc(Br)c(cc1)O	5847-59-6	Negative	Within Euclidean Distance and Leverages	Low reliability
699	bromotyrosylalanine	C([C@@H](C(=O)N[C@H](C(=O)O)C)NBr)c1ccc(cc1)O	2415934-44-8	1513	Within Euclidean Distance and Leverages	High reliability	331.16	501.045	687	2-bromo-6-chloro-4-nitrophenol	N(=O)(=O)c1cc(Br)c(c(c1)Cl)O	20294-55-7	Negative	Within Euclidean Distance and Leverages	Low reliability
700	N-bromo-N-chlorotyrosylglycine	[C@H](Cc1ccc(cc1)O)(C(=O)NCC(=O)O)N(Br)Cl	2415934-51-7	762	Within Euclidean Distance and Leverages	High reliability	351.58	267.904	688	2,6-dibromo-4-nitro-phenol	N(=O)(=O)c1cc(Br)c(c(c1)Br)O	99-28-5	Negative	Within Euclidean Distance and Leverages	Low reliability
701	N-bromo-N-chlorotyrosylalanine	C([C@@H](C(=O)N[C@H](C(=O)O)C)N(Br)Cl)c1ccc(cc1)O	2415934-45-9	1372	Within Euclidean Distance and Leverages	High reliability	365.61	501.617	689	2,4-diiodo-6-nitrophenol	N(=O)(=O)c1c(O)c(I)cc(c1)I	20294-48-8	Negative	Within Euclidean Distance and Leverages	Low reliability
702	(2-amino-3-(4-hydroxy-3-iodophenyl)propanoyl)glycine	C([C@@H](C(=O)NCC(=O)O)N)c1cc(I)c(cc1)O	71400-72-1	1775	Within Euclidean Distance and Leverages	High reliability	364.14	646.349	690	2,6-diiodo-4-nitrophenol	N(=O)(=O)c1cc(I)c(c(c1)I)O	305-85-1	Negative	Within Euclidean Distance and Leverages	Low reliability
704	dibromotyrosylglycine	[C@H](Cc1ccc(cc1)O)(C(=O)NCC(=O)O)N(Br)Br	2415934-49-3	736	Within Euclidean Distance and Leverages	High reliability	396.03	291.478	691	2,4-dibromo-6-nitrobenzenediol	N(=O)(=O)c1c(O)c(Br)c(c(c1)Br)O	484653-20-5	Positive	Within Euclidean Distance and Leverages	Low reliability
705	dibromotyrosylalanine	C([C@@H](C(=O)N[C@H](C(=O)O)C)N(Br)Br)c1ccc(cc1)O	2415934-46-0	1147	Within Euclidean Distance and Leverages	High reliability	410.06	470.339	692	chlorophenylalanylglycine	C([C@@H](C(=O)NCC(=O)O)NCl)c1ccccc1	201216-27-5	Positive	Within Euclidean Distance and Leverages	Low reliability
706	(2-(bromoamino)-3-(4-hydroxy-3-iodophenyl)propanoyl)glycine	C([C@@H](C(=O)NCC(=O)O)NBr)c1cc(I)c(cc1)O	2415934-50-6	1177	Within Euclidean Distance and Leverages	High reliability	443.03	521.446	693	chlorotyrosylglycine	C([C@@H](C(=O)NCC(=O)O)NCl)c1ccc(cc1)O	2095513-62-3	Positive	Within Euclidean Distance and Leverages	Low reliability
707	(2-(bromoamino)-3-(4-hydroxy-3-iodophenyl)propanoyl)alanine	C([C@@H](C(=O)N[C@H](C(=O)O)C)NBr)c1cc(I)c(cc1)O	2415934-47-1	960	Within Euclidean Distance and Leverages	High reliability	457.06	438.778	694	chlorotyrosylalanine	C([C@@H](C(=O)N[C@H](C(=O)O)C)NCl)c1ccc(cc1)O	2095513-65-6	Positive	Within Euclidean Distance and Leverages	Low reliability
708	(2-amino-3-(4-hydroxy-3,5-diiodophenyl)propanoyl)glycine	C([C@@H](C(=O)NCC(=O)O)N)c1cc(I)c(c(c1)I)O	1030-59-7	1597	Within Euclidean Distance and Leverages	High reliability	490.03	782.578	695	dichlorophenylalanylglycine	C([C@@H](C(=O)NCC(=O)O)N(Cl)Cl)c1ccccc1	2095513-64-5	Positive	Within Euclidean Distance and Leverages	Low reliability
710	Benzoic acid, 3-chloro-4-(dimethylamino)-, 2-ethylhexyl ester	C(=O)(OCC(CCCC)CC)c1cc(Cl)c(cc1)N(C)C	2074608-47-0	43.8	Within Euclidean Distance and Leverages	Low reliability	311.8	13.6568	696	dichlorotyrosylglycine	[C@H](Cc1ccc(cc1)O)(C(=O)NCC(=O)O)N(Cl)Cl	2095513-63-4	Positive	Within Euclidean Distance and Leverages	Low reliability
711	Benzoic acid, 3-bromo-​4-​(dimethylamino)​-​, 2-​ethylhexyl ester	C(=O)(OCC(CCCC)CC)c1cc(Br)c(cc1)N(C)C	2075745-69-4	72.7	Within Euclidean Distance and Leverages	Low reliability	356.3	25.903	697	bromotyrosylglycine	C([C@@H](C(=O)NCC(=O)O)NBr)c1ccc(cc1)O	2415934-48-2	Positive	Within Euclidean Distance and Leverages	Low reliability
712	Benzoic acid, 3-bromo-​5-​chloro-​4-​(dimethylamino)​-​, 2-​ethylhexyl ester	C(=O)(OCC(CCCC)CC)c1cc(Br)c(c(c1)Cl)N(C)C	2074606-88-3	72.7	Within Euclidean Distance and Leverages	Low reliability	390.7	28.4039	698	dichlorotyrosylalanine	C([C@@H](C(=O)N[C@H](C(=O)O)C)N(Cl)Cl)c1ccc(cc1)O	2095513-66-7	Positive	Within Euclidean Distance and Leverages	Low reliability
713	Benzoic acid, 3,5-​dibromo-​4-​(dimethylamino)​-​, 2-​ethylhexyl ester	C(=O)(OCC(CCCC)CC)c1cc(Br)c(c(c1)Br)N(C)C	2075745-70-7	59.8	Within Euclidean Distance and Leverages	Low reliability	435.2	26.025	699	bromotyrosylalanine	C([C@@H](C(=O)N[C@H](C(=O)O)C)NBr)c1ccc(cc1)O	2415934-44-8	Positive	Within Euclidean Distance and Leverages	Low reliability
714	Benzyl 2-chloroacetate	C(OC(=O)CCl)c1ccccc1	140-18-1	311	Within Euclidean Distance and Leverages	Low reliability	184.62	57.4168	700	N-bromo-N-chlorotyrosylglycine	[C@H](Cc1ccc(cc1)O)(C(=O)NCC(=O)O)N(Br)Cl	2415934-51-7	Positive	Within Euclidean Distance and Leverages	Low reliability
715	Propanoic acid, 3-chloro-​, 4-​formylphenyl ester	O(C(=O)CCCl)c1ccc(cc1)C=O	959313-38-3	1146	Within Euclidean Distance and Leverages	Low reliability	212.63	243.674	701	N-bromo-N-chlorotyrosylalanine	C([C@@H](C(=O)N[C@H](C(=O)O)C)N(Br)Cl)c1ccc(cc1)O	2415934-45-9	Positive	Within Euclidean Distance and Leverages	Low reliability
716	Benzoic acid, 3-chloro-​2-​hydroxy-​, phenylmethyl ester	C(=O)(OCc1ccccc1)c1c(O)c(Cl)ccc1	1106305-60-5	641	Within Euclidean Distance and Leverages	Moderate reliability	262.69	168.384	702	(2-amino-3-(4-hydroxy-3-iodophenyl)propanoyl)glycine	C([C@@H](C(=O)NCC(=O)O)N)c1cc(I)c(cc1)O	71400-72-1	Positive	Within Euclidean Distance and Leverages	Low reliability
717	Benzoic acid, 3,5-​dichloro-​2-​hydroxy-​, phenylmethyl ester	C(=O)(OCc1ccccc1)c1c(O)c(Cl)cc(c1)Cl	860000-69-7	456	Within Euclidean Distance and Leverages	High reliability	297.1	135.478	703	(2-amino-3-(4-hydroxy-3-iodophenyl)propanoyl)alanine	C([C@@H](C(=O)N[C@H](C(=O)O)C)N)c1cc(I)c(cc1)O	42934-94-1	Positive	Within Euclidean Distance and Leverages	Low reliability
718	Benzoic acid, 5-chloro-​2-​hydroxy-​, phenylmethyl ester	C(=O)(OCc1ccccc1)c1c(O)ccc(c1)Cl	56529-66-9	779	Within Euclidean Distance and Leverages	Moderate reliability	262.69	204.636	704	dibromotyrosylglycine	[C@H](Cc1ccc(cc1)O)(C(=O)NCC(=O)O)N(Br)Br	2415934-49-3	Positive	Within Euclidean Distance and Leverages	Low reliability
719	2,2-dichloro-acetophenon	C(=O)(C(Cl)Cl)c1ccccc1	2648-61-5	542	Within Euclidean Distance and Leverages	Moderate reliability	189.04	102.46	705	dibromotyrosylalanine	C([C@@H](C(=O)N[C@H](C(=O)O)C)N(Br)Br)c1ccc(cc1)O	2415934-46-0	Positive	Within Euclidean Distance and Leverages	Low reliability
720	2-Chloroacetophenone	C(=O)(CCl)c1ccccc1	532-27-4	189	Within Euclidean Distance and Leverages	Moderate reliability	154.59	29.2175	706	(2-(bromoamino)-3-(4-hydroxy-3-iodophenyl)propanoyl)glycine	C([C@@H](C(=O)NCC(=O)O)NBr)c1cc(I)c(cc1)O	2415934-50-6	Positive	Within Euclidean Distance and Leverages	Low reliability
721	(5-Chloro-2-hydroxy-4-methoxyphenyl)phenylmethanone	C(=O)(c1c(O)cc(c(c1)Cl)OC)c1ccccc1	3286-91-7	39.6	Within Euclidean Distance and Leverages	Moderate reliability	262.69	10.4025	707	(2-(bromoamino)-3-(4-hydroxy-3-iodophenyl)propanoyl)alanine	C([C@@H](C(=O)N[C@H](C(=O)O)C)NBr)c1cc(I)c(cc1)O	2415934-47-1	Positive	Within Euclidean Distance and Leverages	Low reliability
722	Methanone, (3,5-dichloro-2-hydroxy-4-methoxyphenyl)phenyl-	C(=O)(c1c(O)c(Cl)c(c(c1)Cl)OC)c1ccccc1	158547-83-2	81.5	Within Euclidean Distance and Leverages	Moderate reliability	297.1	24.2137	708	(2-amino-3-(4-hydroxy-3,5-diiodophenyl)propanoyl)glycine	C([C@@H](C(=O)NCC(=O)O)N)c1cc(I)c(c(c1)I)O	1030-59-7	Positive	Within Euclidean Distance and Leverages	Low reliability
723	4-Hydroxy-3,5-diiodo-1-phenyl	C(=O)(CC(C(C(C)I)O)I)c1ccccc1	1087738-33-7	306	Within Euclidean Distance and Leverages	Low reliability	444.05	135.879	709	(2-amino-3-(4-hydroxy-3,5-diiodophenyl)propanoyl)alanine	C([C@@H](C(=O)N[C@H](C(=O)O)C)N)c1cc(I)c(c(c1)I)O	42934-95-2	Positive	Within Euclidean Distance and Leverages	Low reliability
724	2,4-Dichlorobenzoic acid	C(=O)(O)c1c(Cl)cc(cc1)Cl	50-84-0	266	Within Euclidean Distance and Leverages	Moderate reliability	191.01	50.8087	710	Benzoic acid, 3-chloro-4-(dimethylamino)-, 2-ethylhexyl ester	C(=O)(OCC(CCCC)CC)c1cc(Cl)c(cc1)N(C)C	2074608-47-0	Negative	Within Euclidean Distance and Leverages	Low reliability
725	3,5-Dibromobenzoic acid	C(=O)(O)c1cc(Br)cc(c1)Br	618-58-6	174	Within Euclidean Distance and Leverages	Moderate reliability	279.91	48.7043	711	Benzoic acid, 3-bromo-​4-​(dimethylamino)​-​, 2-​ethylhexyl ester	C(=O)(OCC(CCCC)CC)c1cc(Br)c(cc1)N(C)C	2075745-69-4	Negative	Within Euclidean Distance and Leverages	Low reliability
726	2-Chlorophenylacetic acid	C(C(=O)O)c1c(Cl)cccc1	2444-36-2	1652	Within Euclidean Distance and Leverages	Low reliability	170.59	281.815	712	Benzoic acid, 3-bromo-​5-​chloro-​4-​(dimethylamino)​-​, 2-​ethylhexyl ester	C(=O)(OCC(CCCC)CC)c1cc(Br)c(c(c1)Cl)N(C)C	2074606-88-3	Negative	Within Euclidean Distance and Leverages	Low reliability
727	2,4-Dichlorophenylacetic acid	C(C(=O)O)c1c(Cl)cc(cc1)Cl	19719-28-9	732	Within Euclidean Distance and Leverages	Low reliability	205.03	150.082	713	Benzoic acid, 3,5-​dibromo-​4-​(dimethylamino)​-​, 2-​ethylhexyl ester	C(=O)(OCC(CCCC)CC)c1cc(Br)c(c(c1)Br)N(C)C	2075745-70-7	Negative	Within Euclidean Distance and Leverages	Low reliability
728	3-BroMo-4-hydroxybenzoic Acid	C(=O)(O)c1cc(Br)c(cc1)O	14348-41-5	799	Within Euclidean Distance and Leverages	High reliability	217.02	173.399	714	Benzyl 2-chloroacetate	C(OC(=O)CCl)c1ccccc1	140-18-1	Positive	Within Euclidean Distance and Leverages	Low reliability
729	3-Chloro-4-hydroxybenzoic Acid	C(=O)(O)c1cc(Cl)c(cc1)O	3964-58-7	293	Within Euclidean Distance and Leverages	High reliability	172.56	50.5601	715	Propanoic acid, 3-chloro-​, 4-​formylphenyl ester	O(C(=O)CCCl)c1ccc(cc1)C=O	959313-38-3	Negative	Within Euclidean Distance and Leverages	Low reliability
730	3-Chlorosalicylic acid	C(=O)(O)c1c(O)c(Cl)ccc1	1829-32-9	124	Within Euclidean Distance and Leverages	High reliability	172.56	21.3974	716	Benzoic acid, 3-chloro-​2-​hydroxy-​, phenylmethyl ester	C(=O)(OCc1ccccc1)c1c(O)c(Cl)ccc1	1106305-60-5	Negative	Within Euclidean Distance and Leverages	Moderate reliability
731	Phenylalanine, N-chloro-	C(C(C(=O)O)NCl)c1ccccc1	52316-76-4	386	Within Euclidean Distance and Leverages	Moderate reliability	199.63	77.0572	717	Benzoic acid, 3,5-​dichloro-​2-​hydroxy-​, phenylmethyl ester	C(=O)(OCc1ccccc1)c1c(O)c(Cl)cc(c1)Cl	860000-69-7	Negative	Within Euclidean Distance and Leverages	Moderate reliability
[truncated: 1,071 more rows]

## Sheet: Table S12
Table S12 List of High Priority DBPs
No.	CAS NO	Name	SMILES Code	Cyto_Pre(mg/L)	Geno_Pre	EndocrineDisrupting_Priority	AquaticTox_Priority	Predictive Hazard Priority	Current Regulation	Reference articles
[truncated: 386 more rows]
